# Supplementary material
Source: publisher figshare collection journal article supplement (https://frontiersin.figshare.com/ndownloader/files/15450311)

# HA-Group1

Supplementary Figure 3. 132 phylogenetic trees of HA used for the adaptive evolution analyses. Human strains are marked in red. Branches which have significant signals of positive selection are marked with \*.

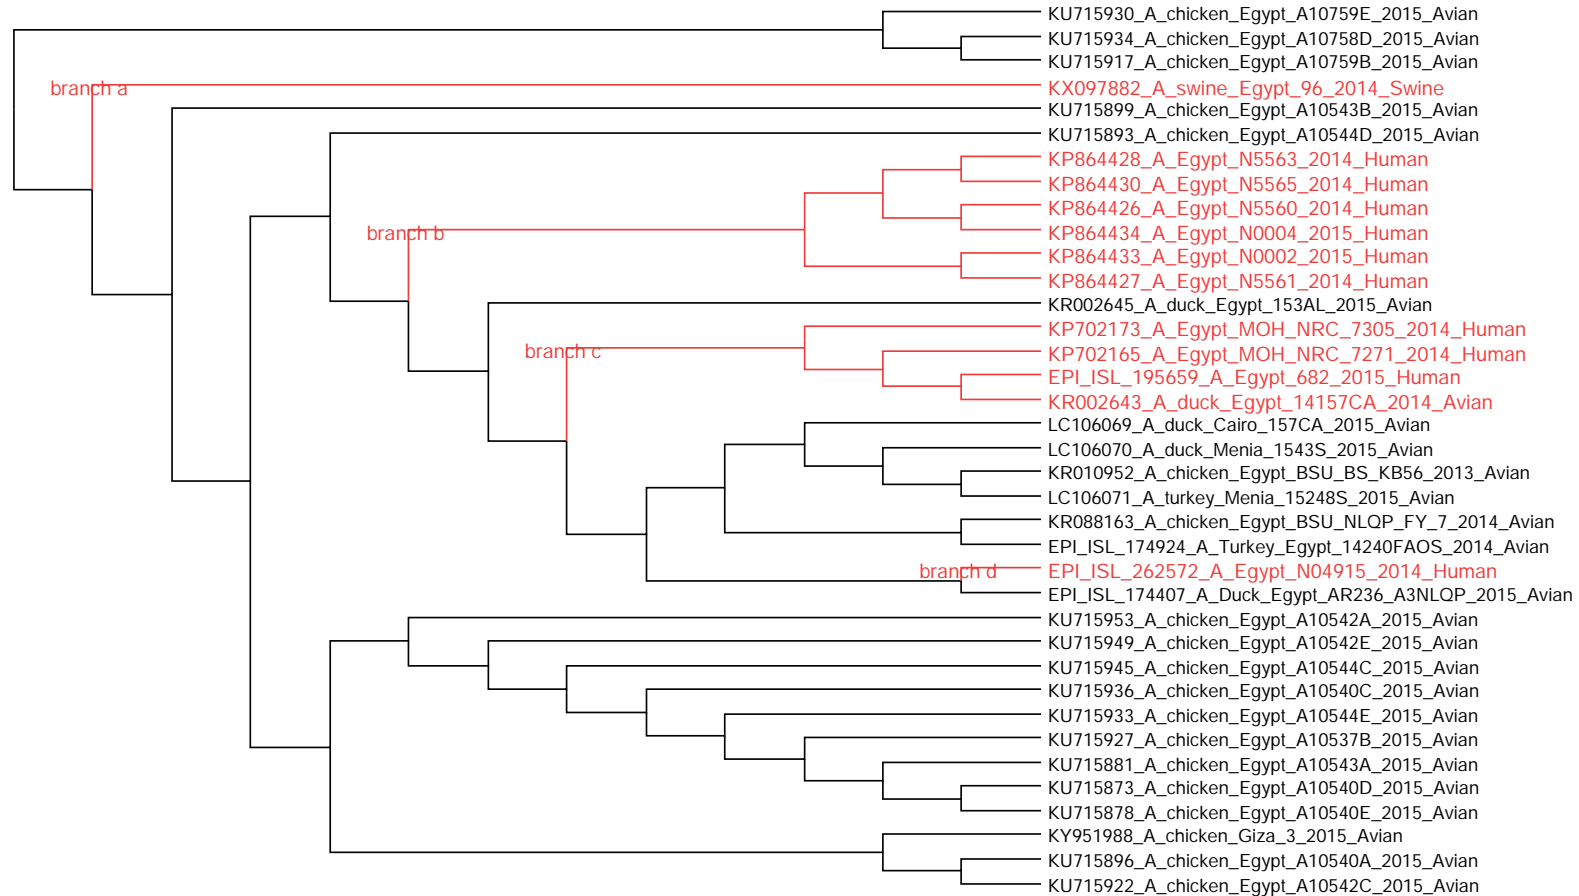

# HA-Group2

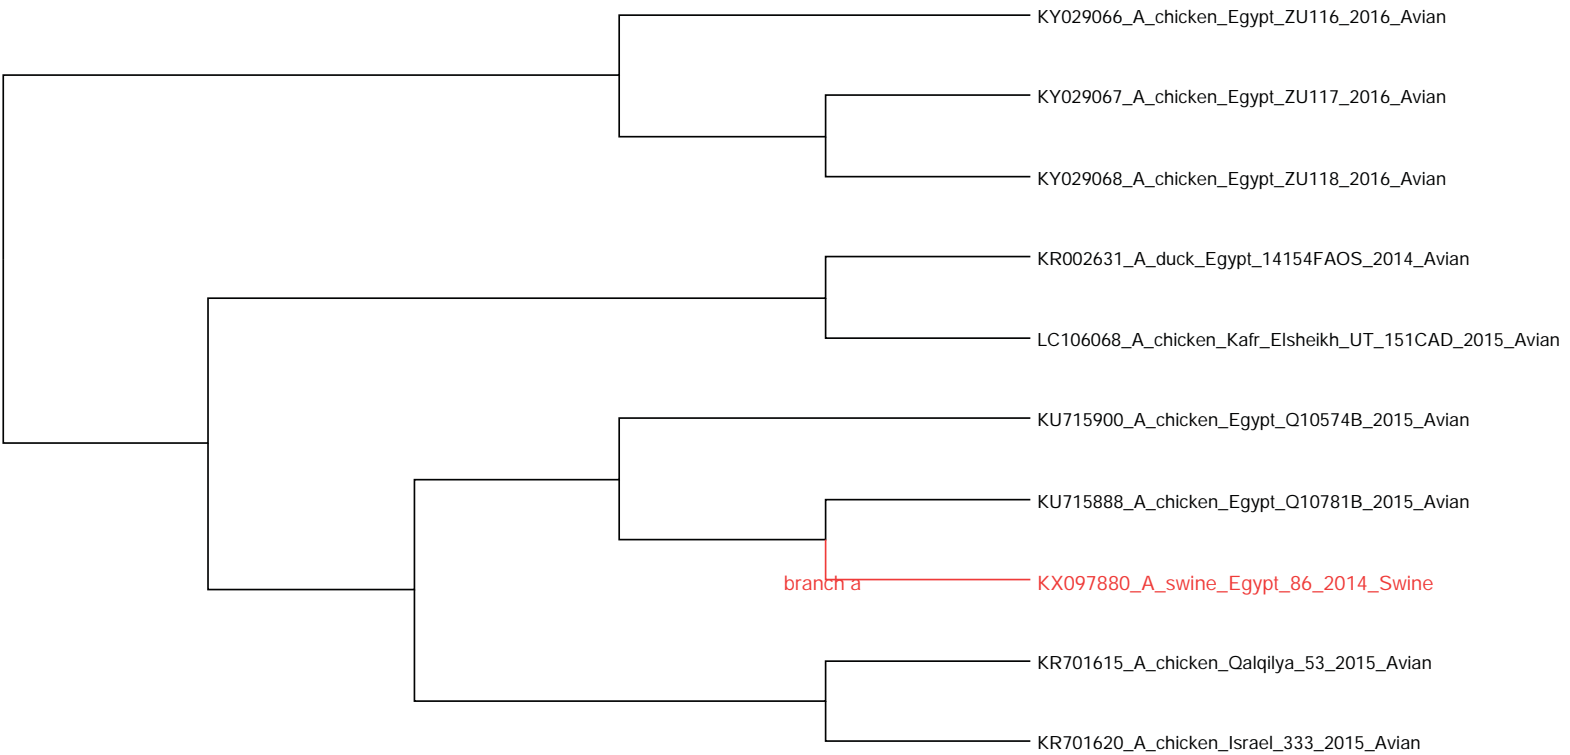

# HA-Group3

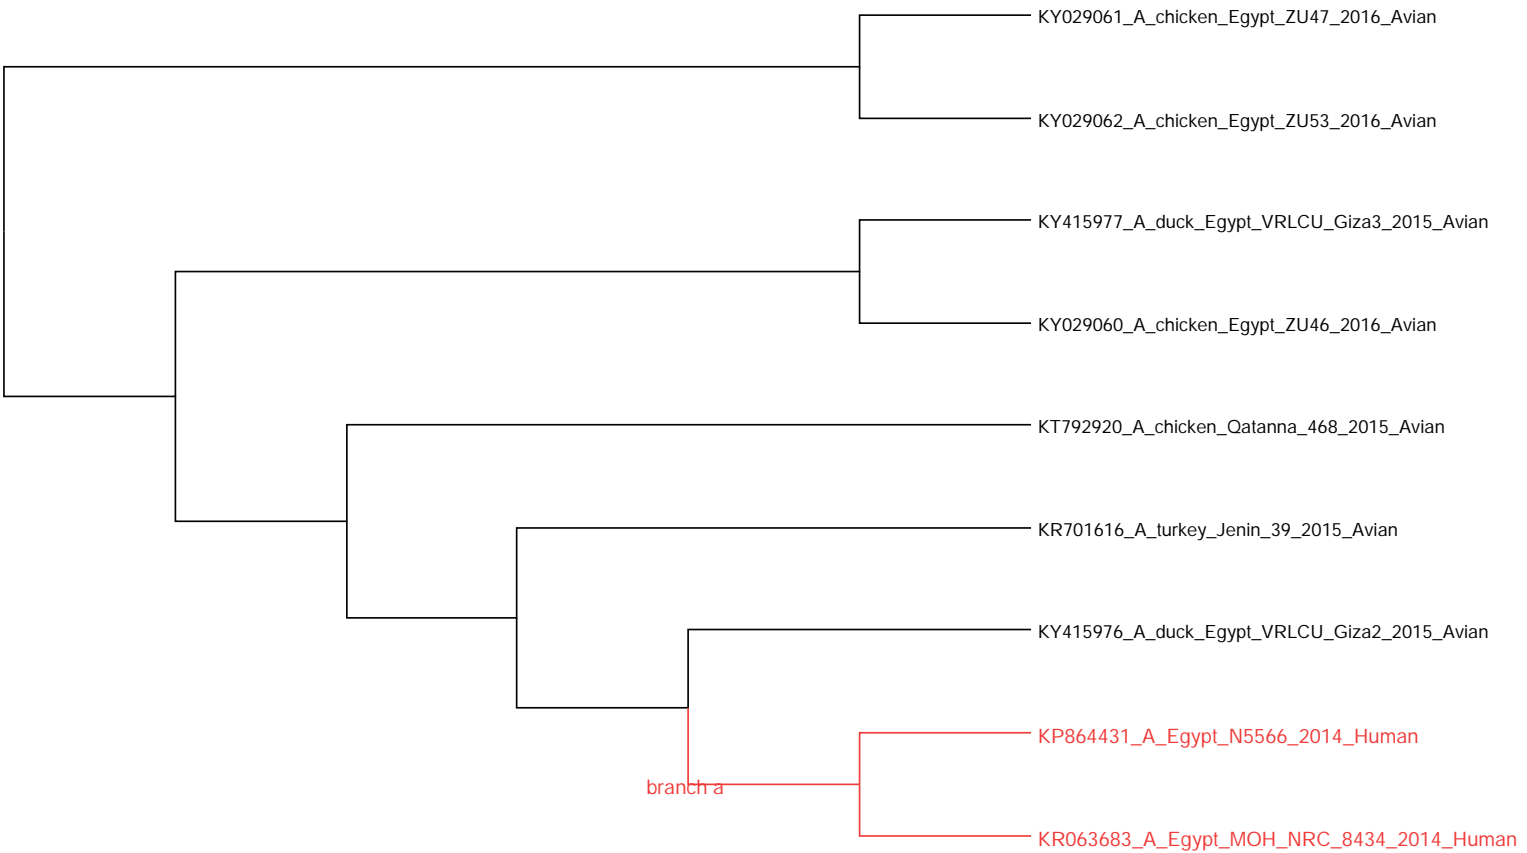

# HA-Group4

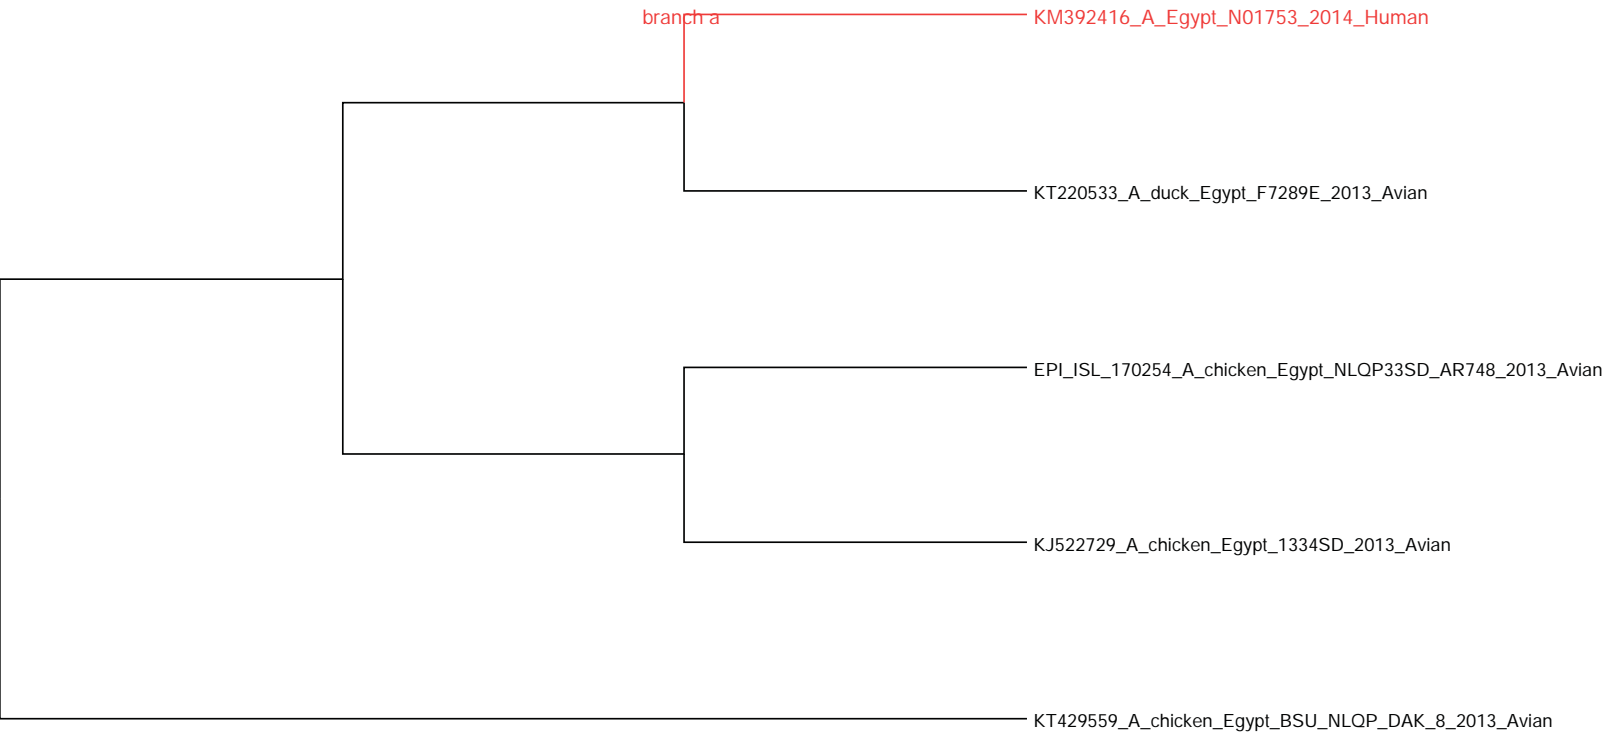

# HA-Groups

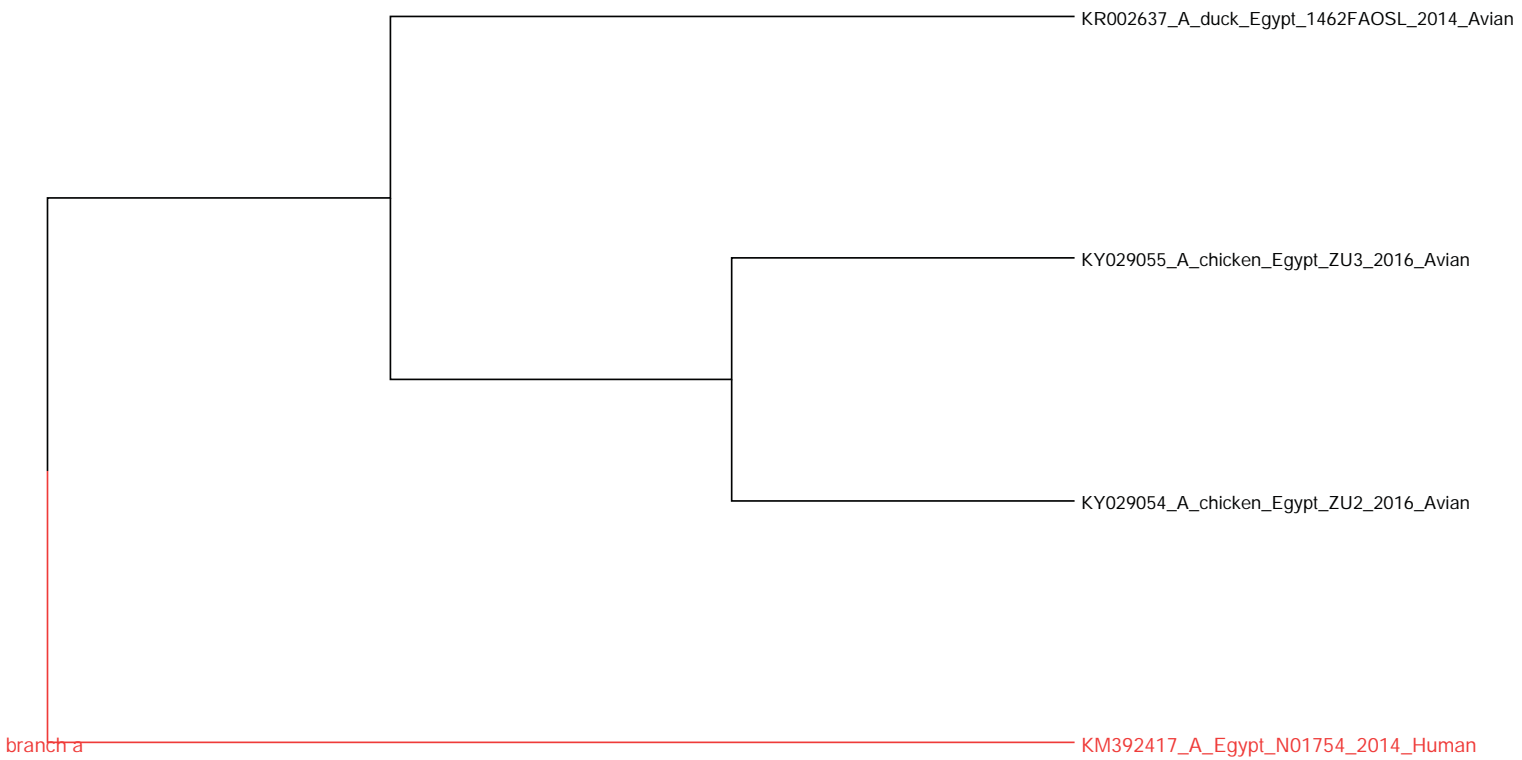

# HA-Group6

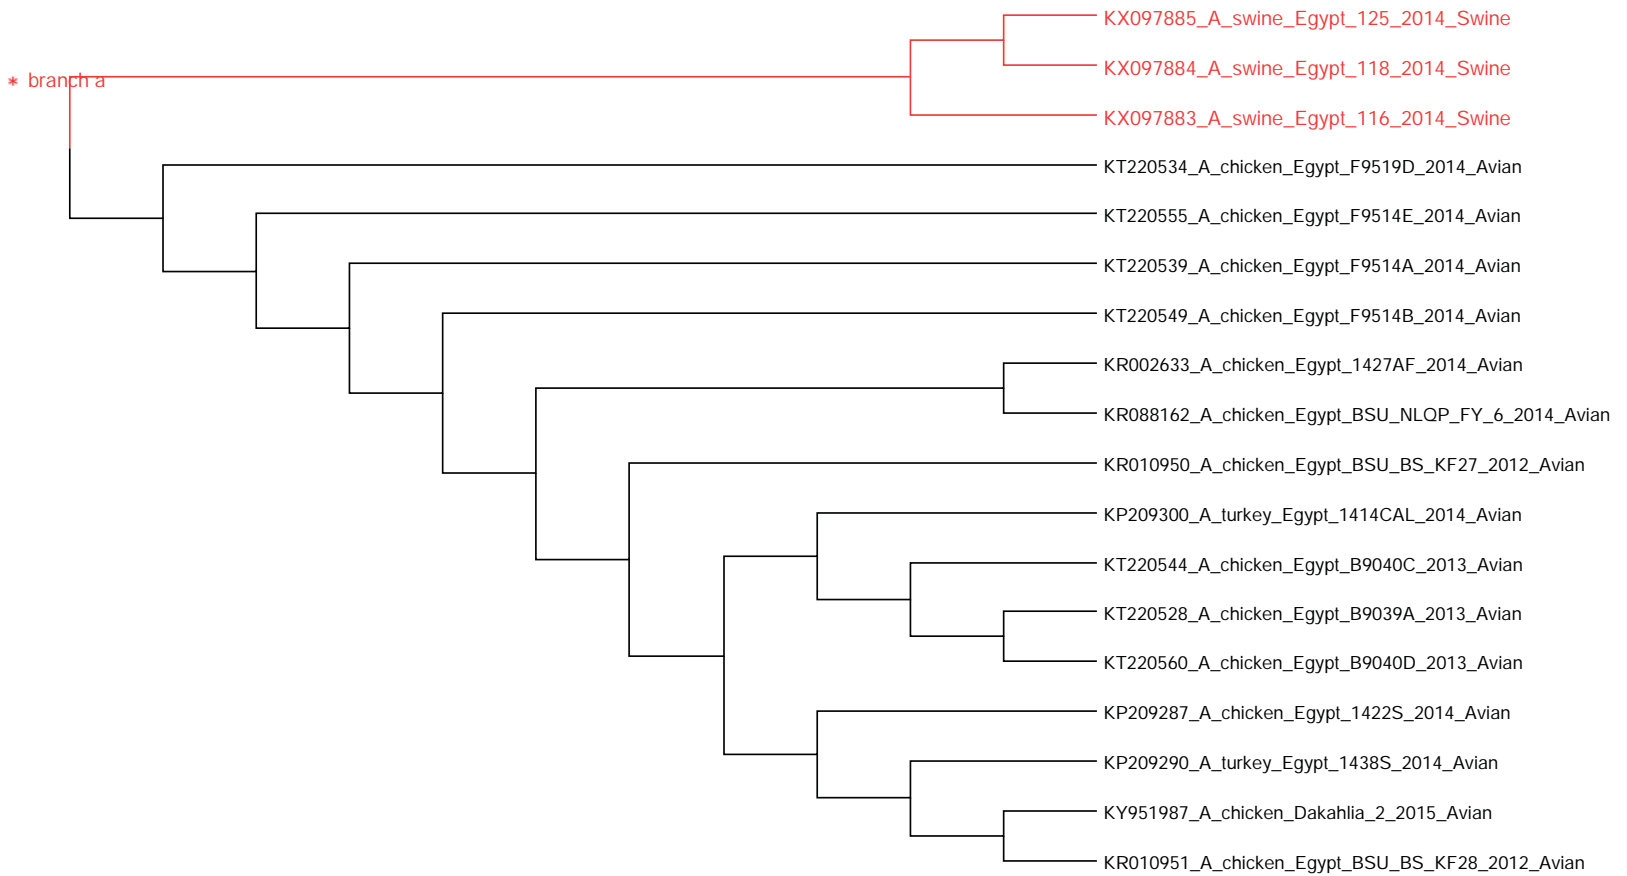

# HA-Group7

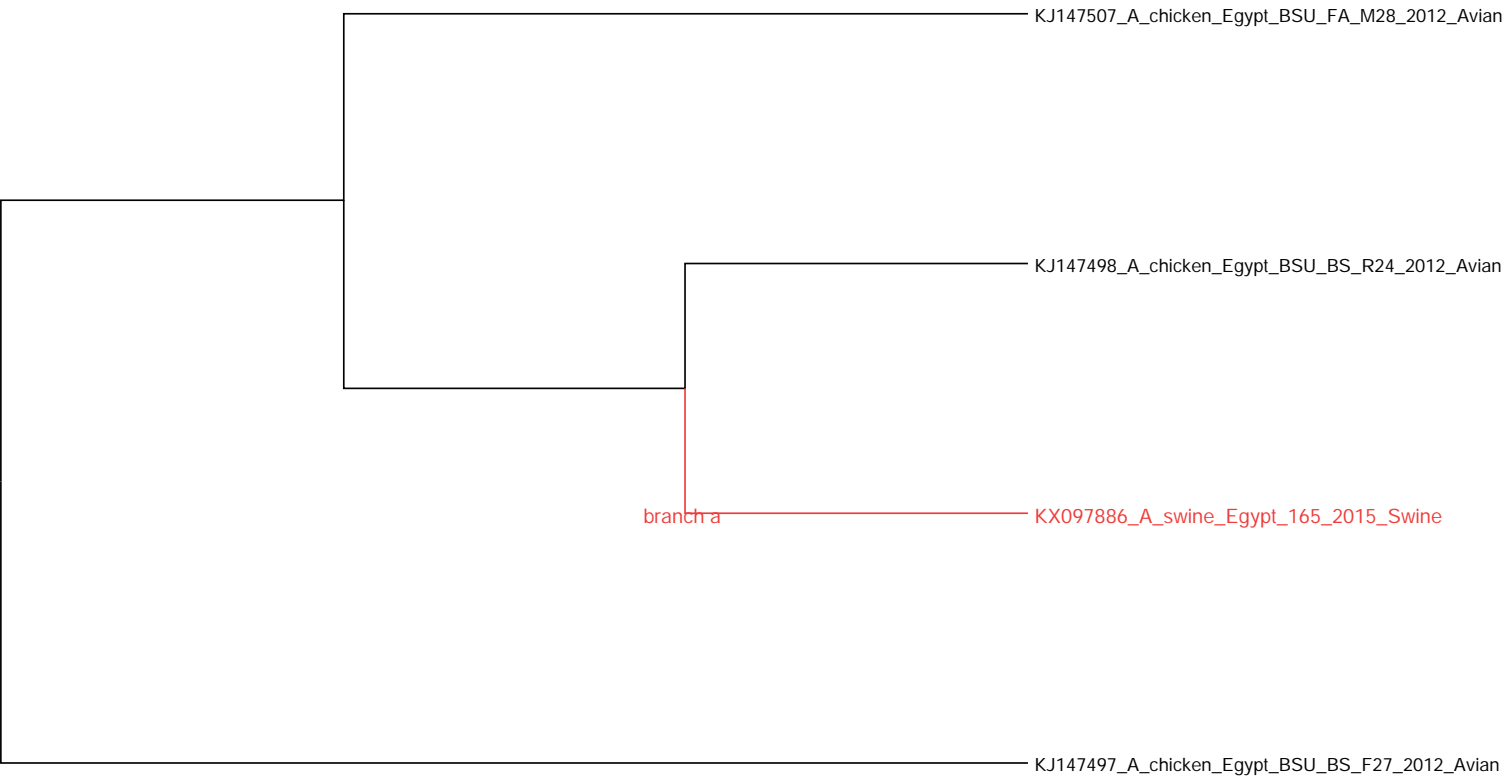

# HA-Group8

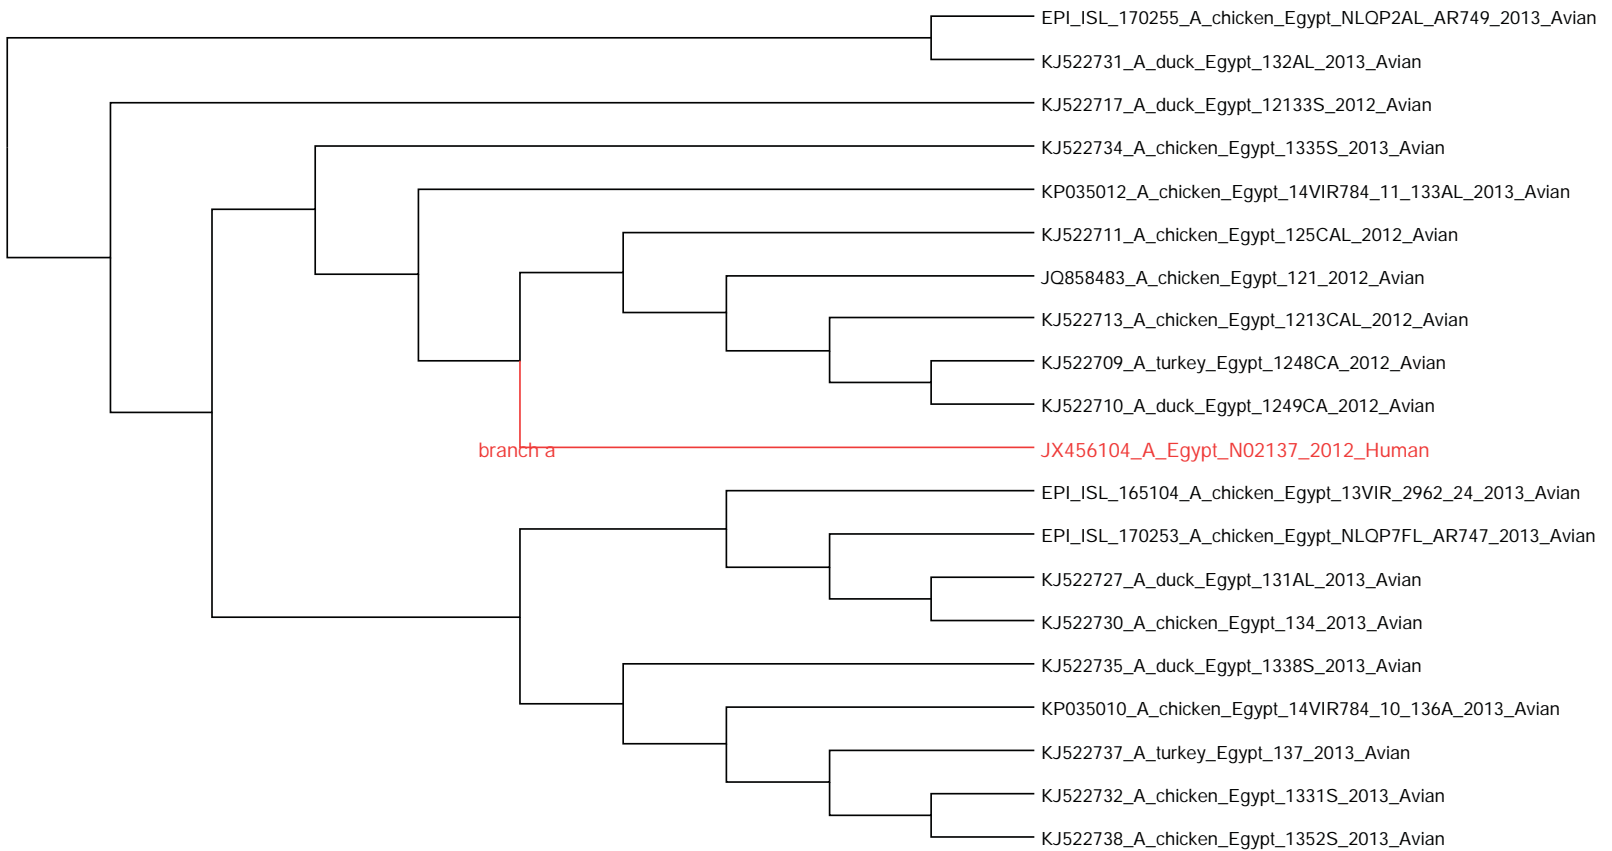



# HA-Group9

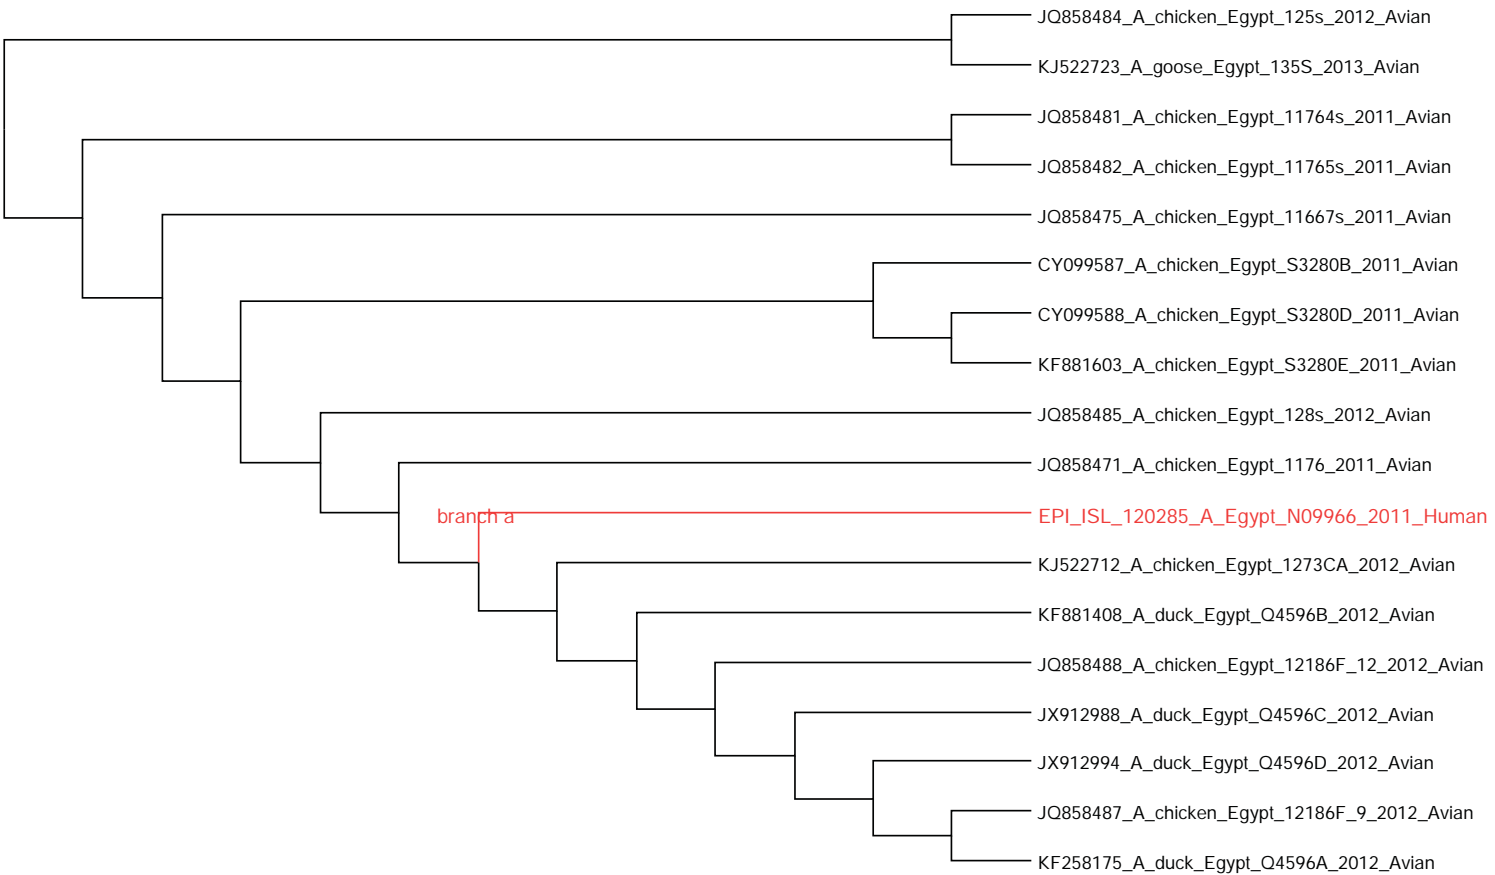

# HA-Group10

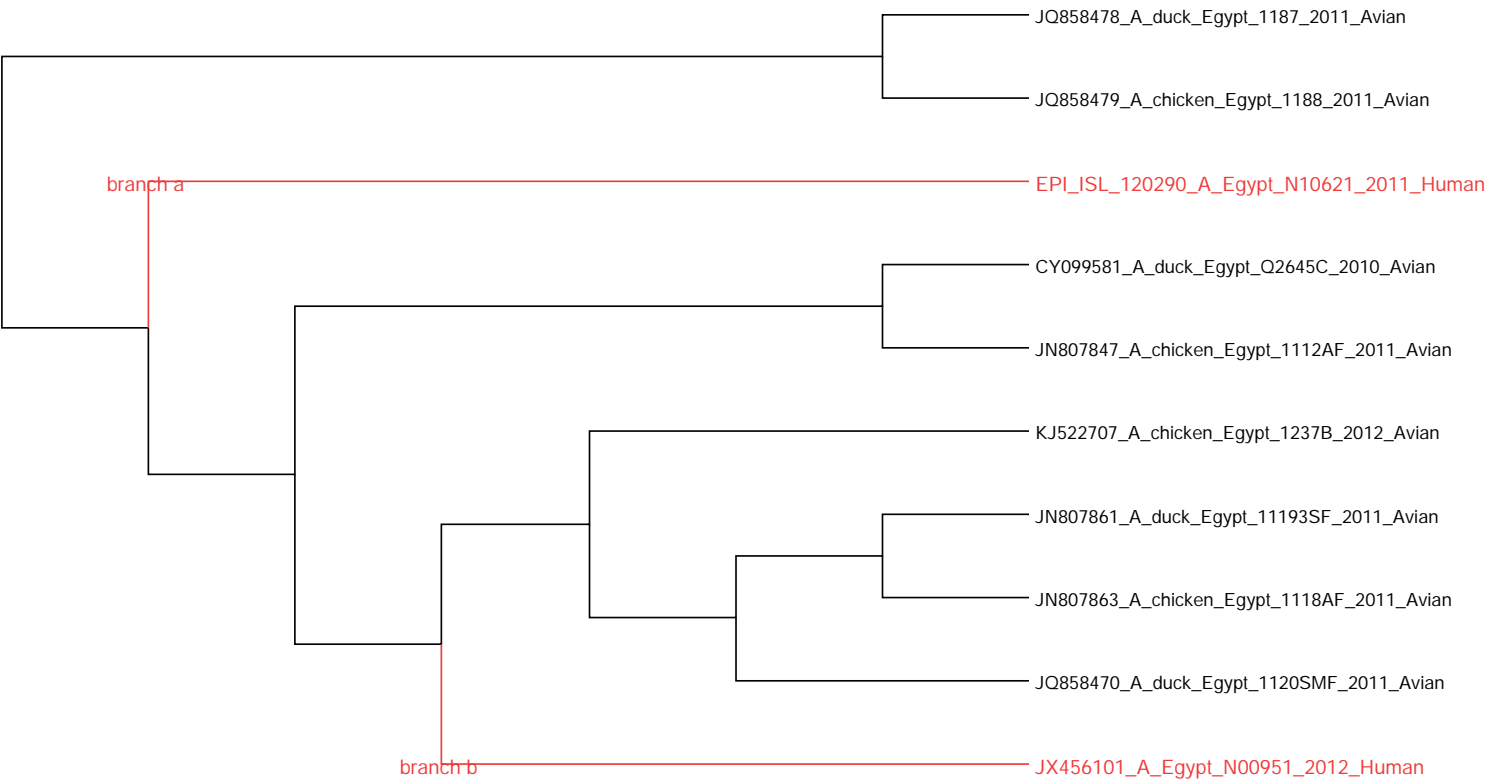

# HA-Group 1

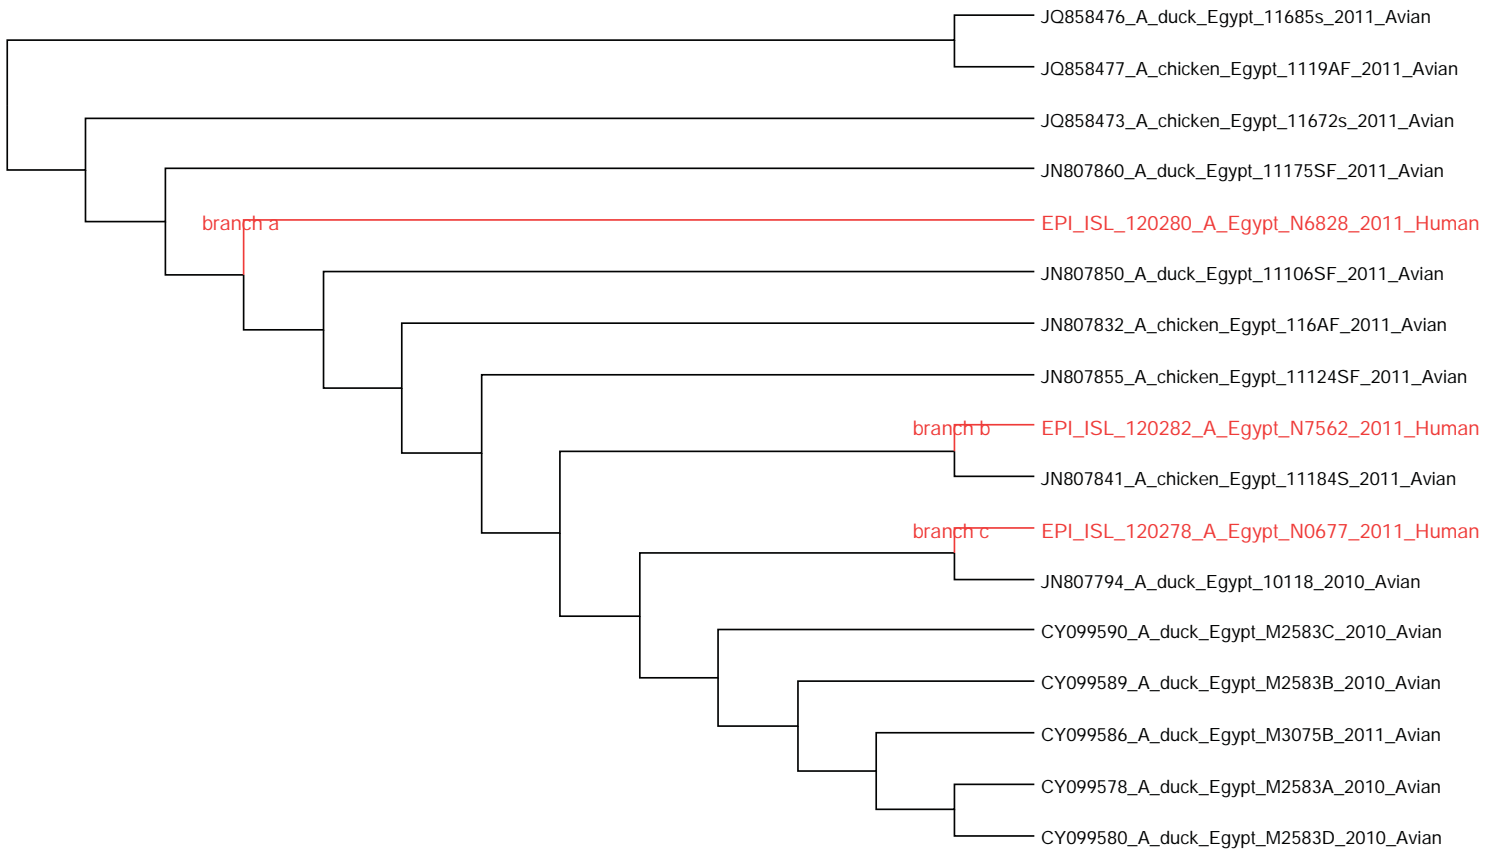

# HA-Group12

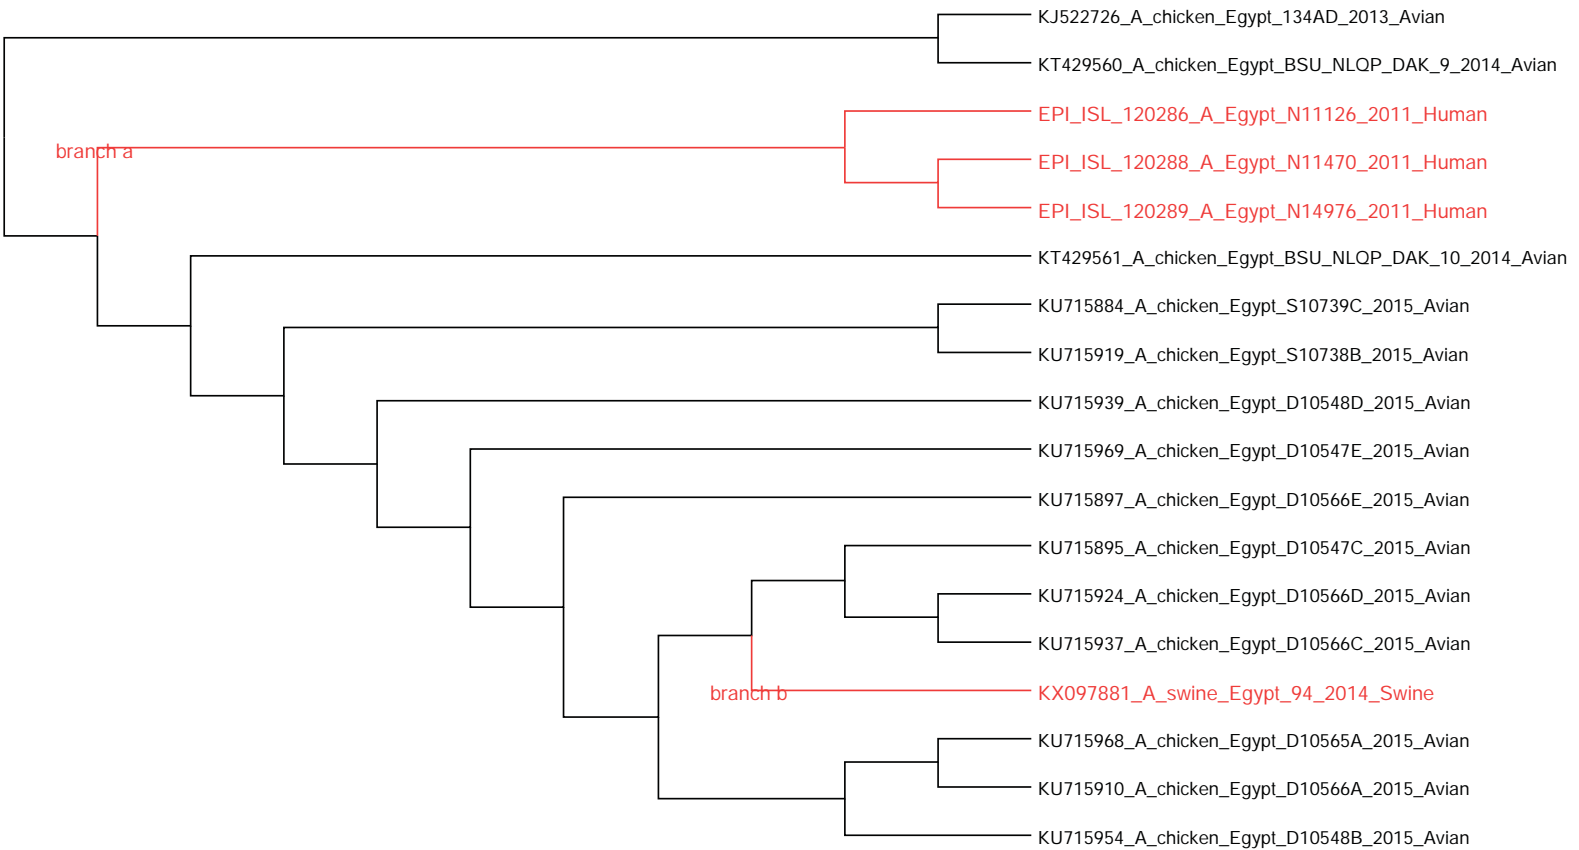

# HA-Group13

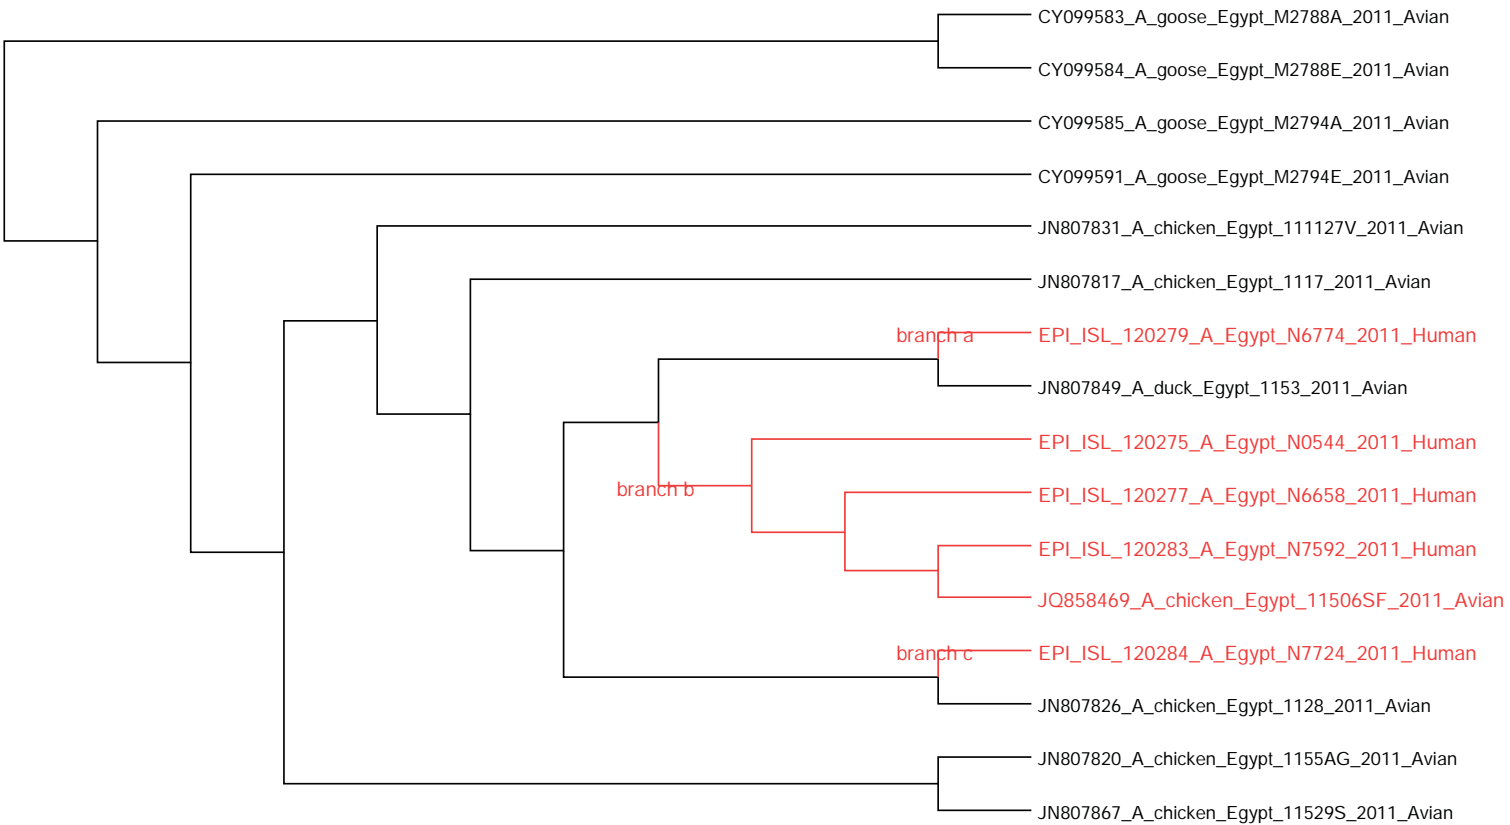

# HA-Group 14

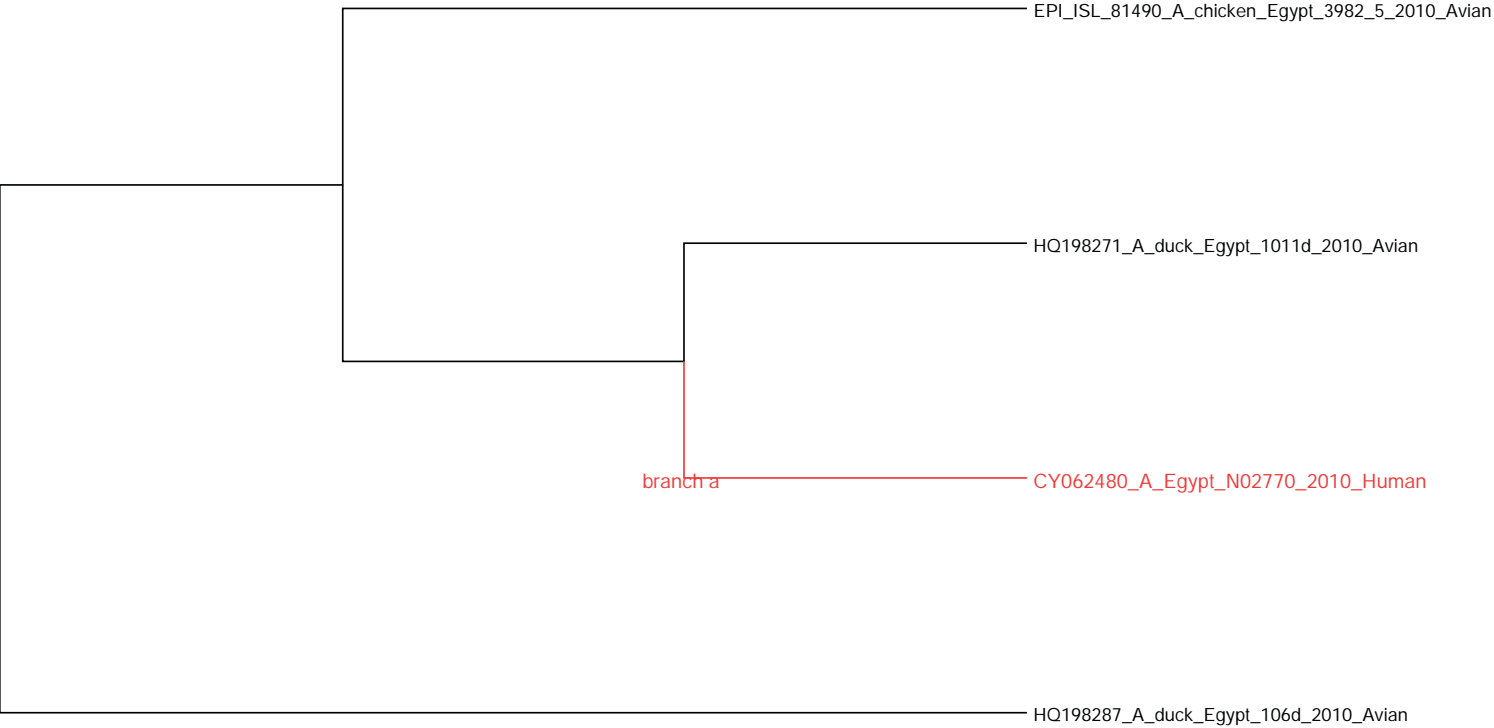

# HA-Group 15

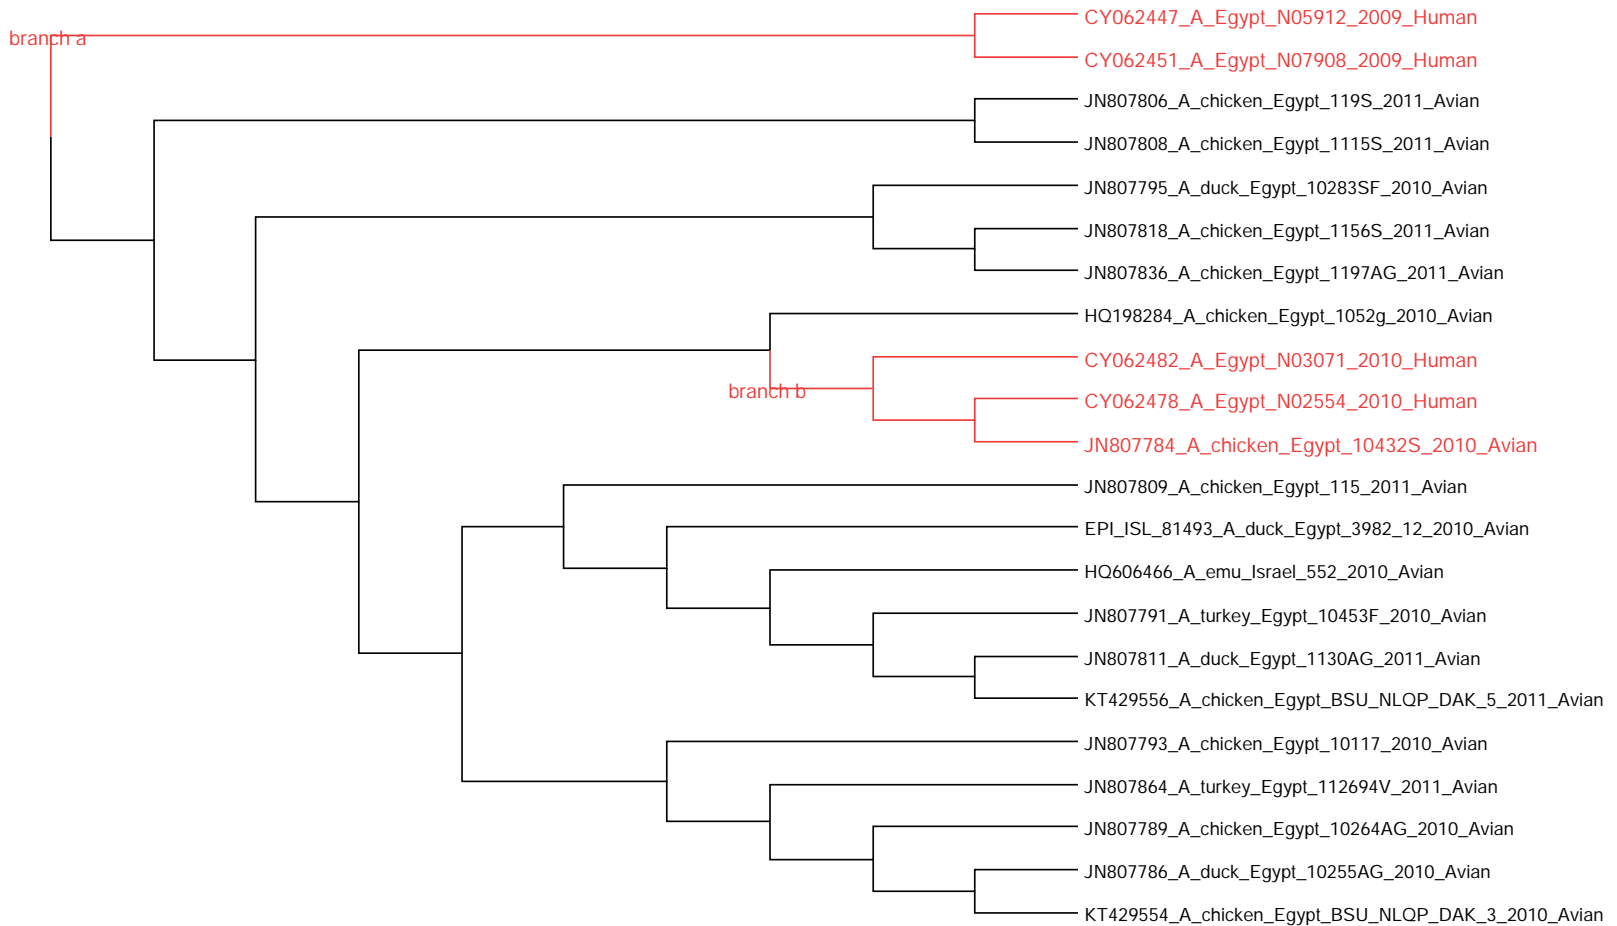

# HA-Group16

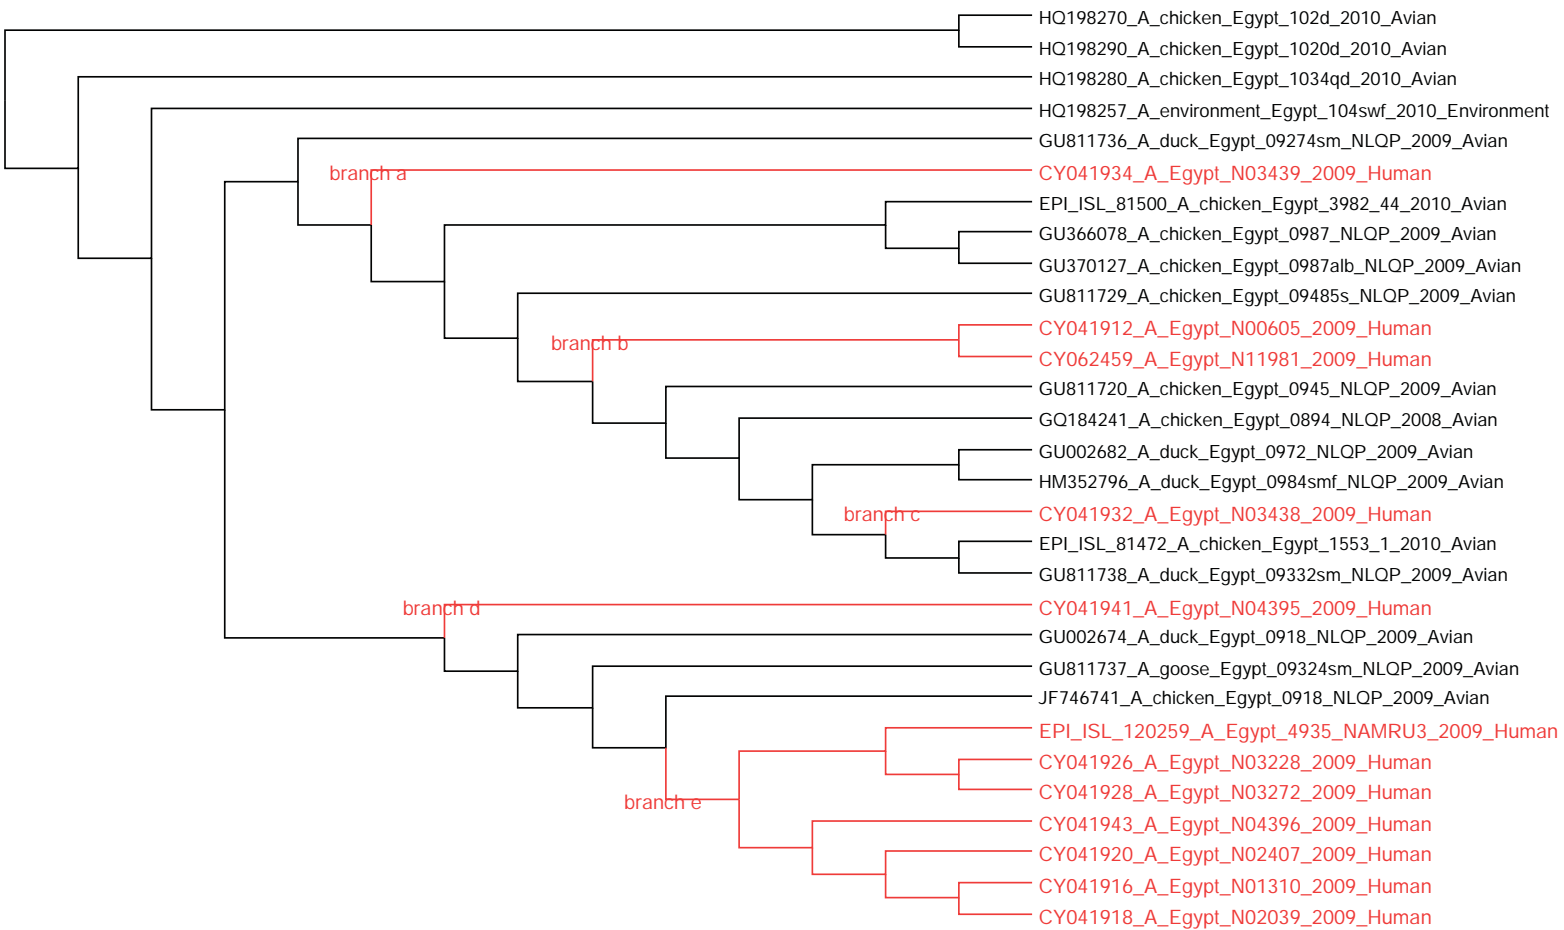



# HA-Group17

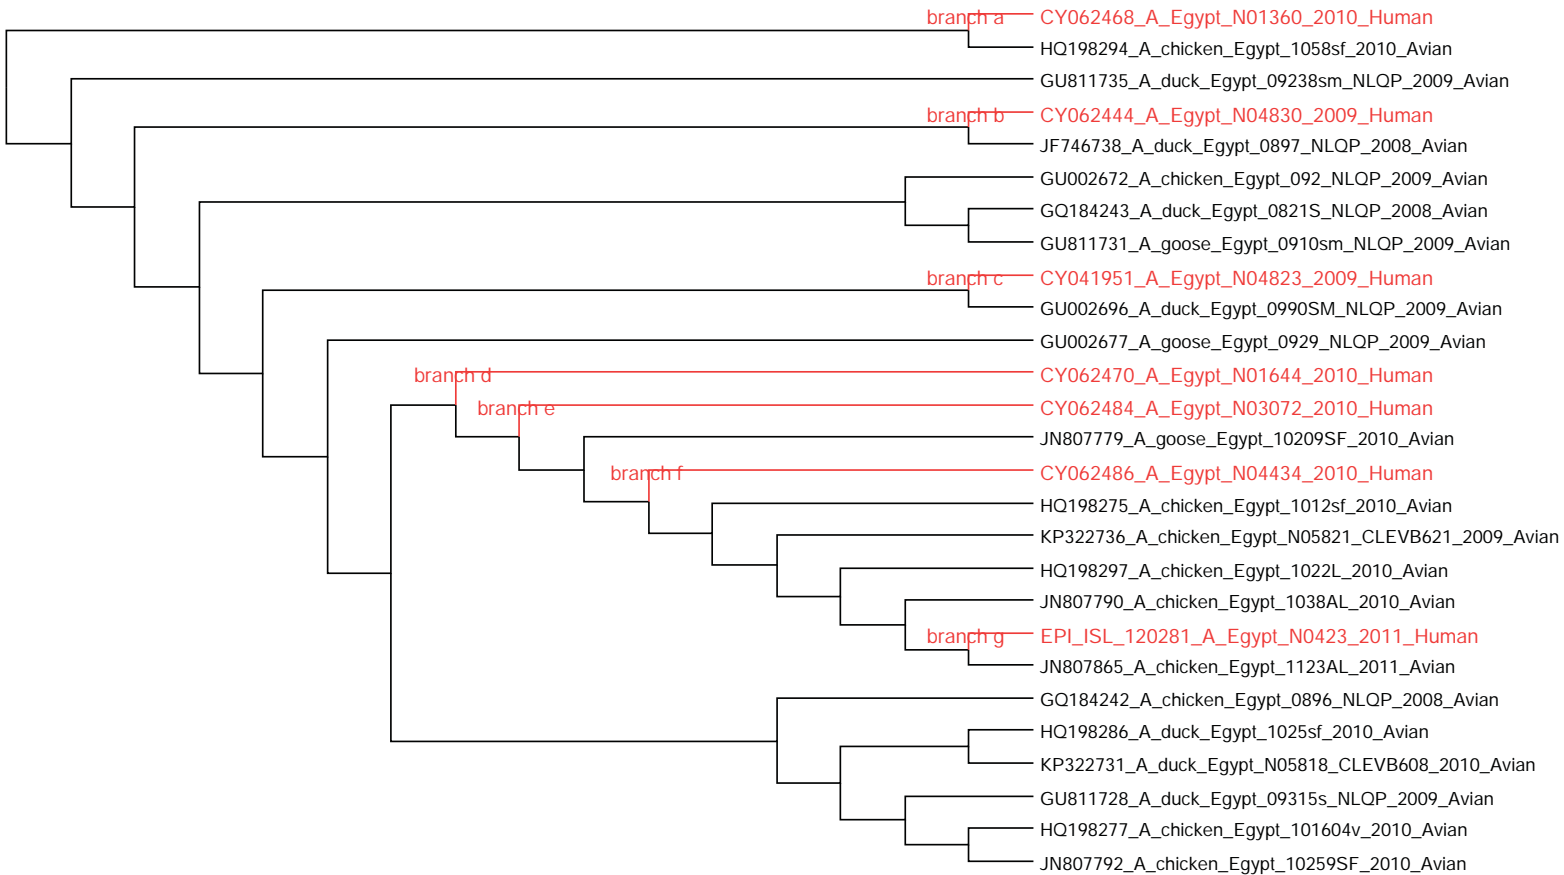

# HA-Group 18

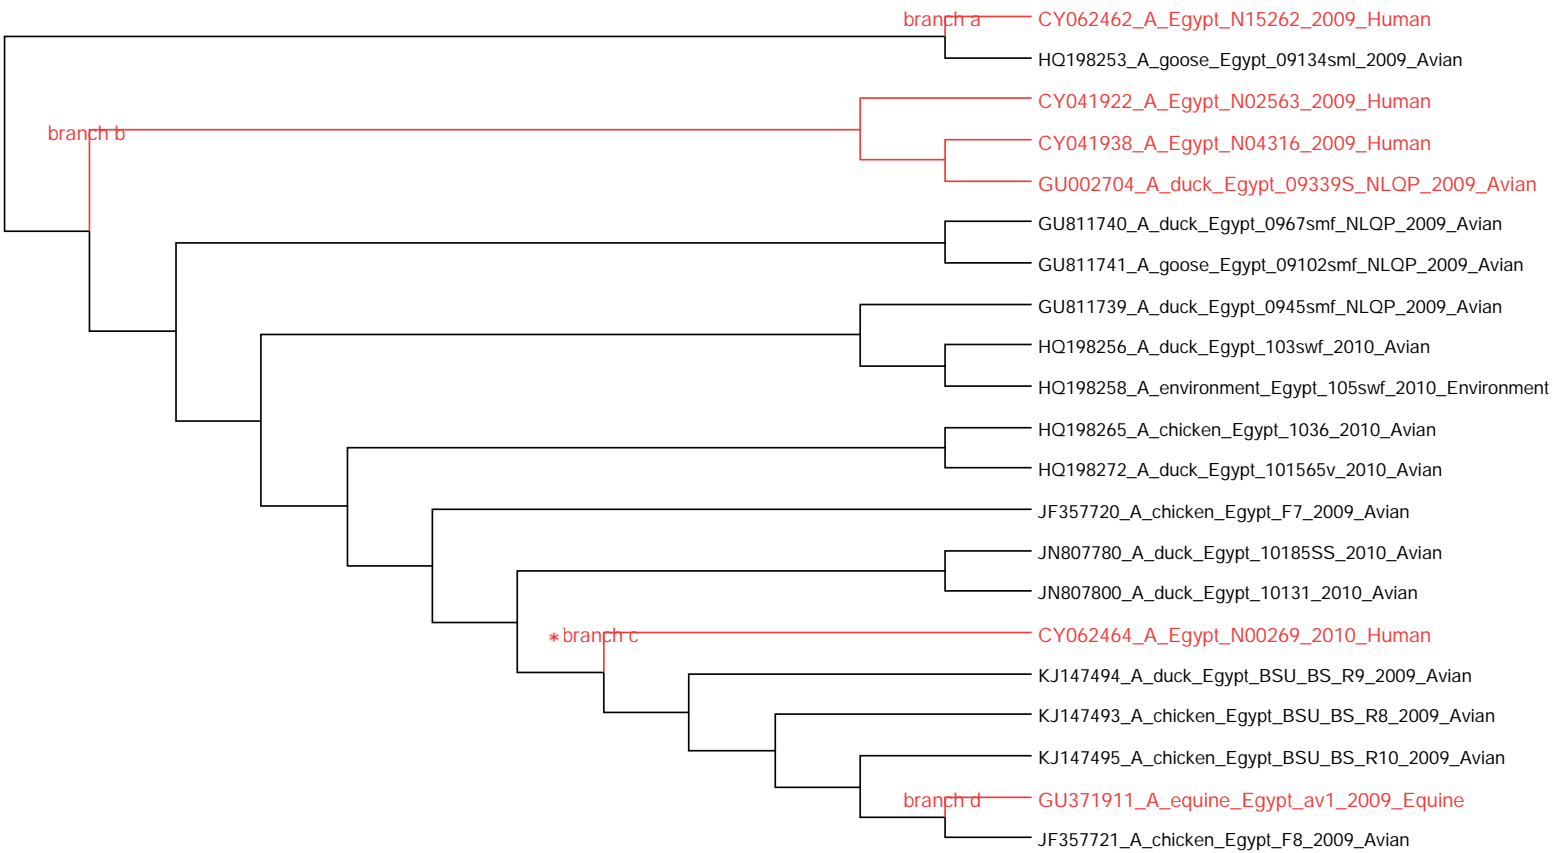

# HA-Group19

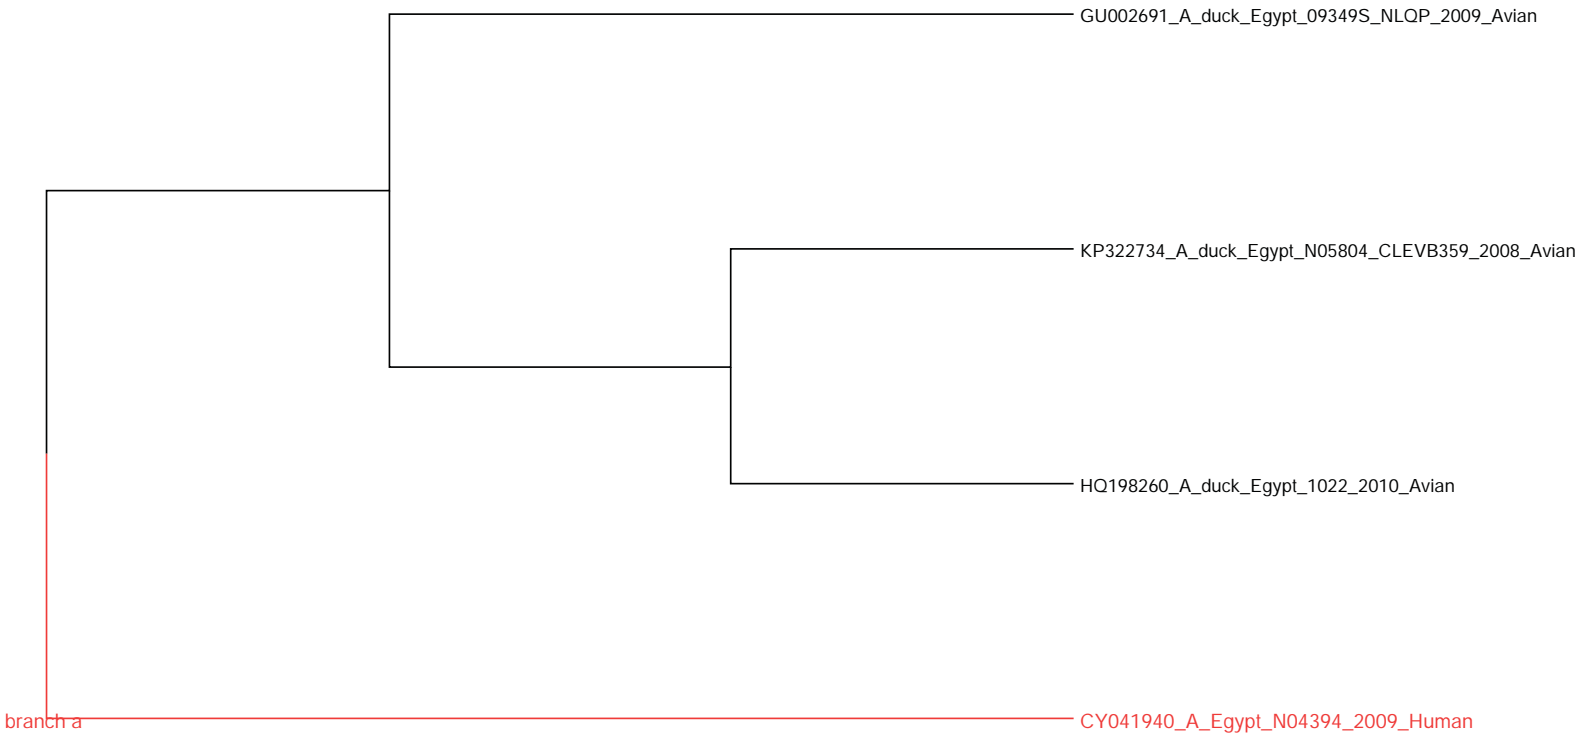

# HA-Group20

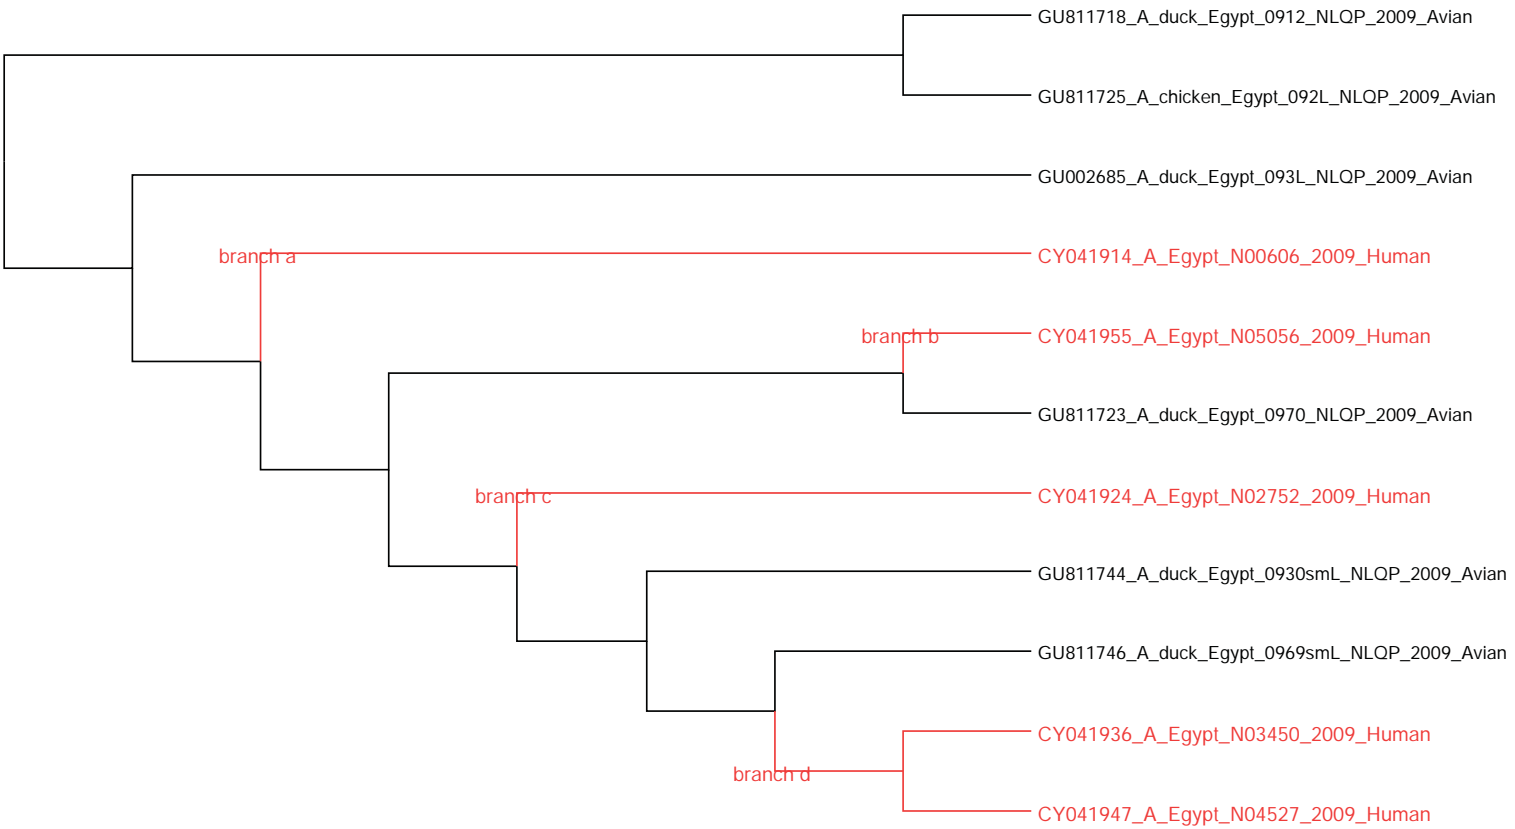

# HA-Group21

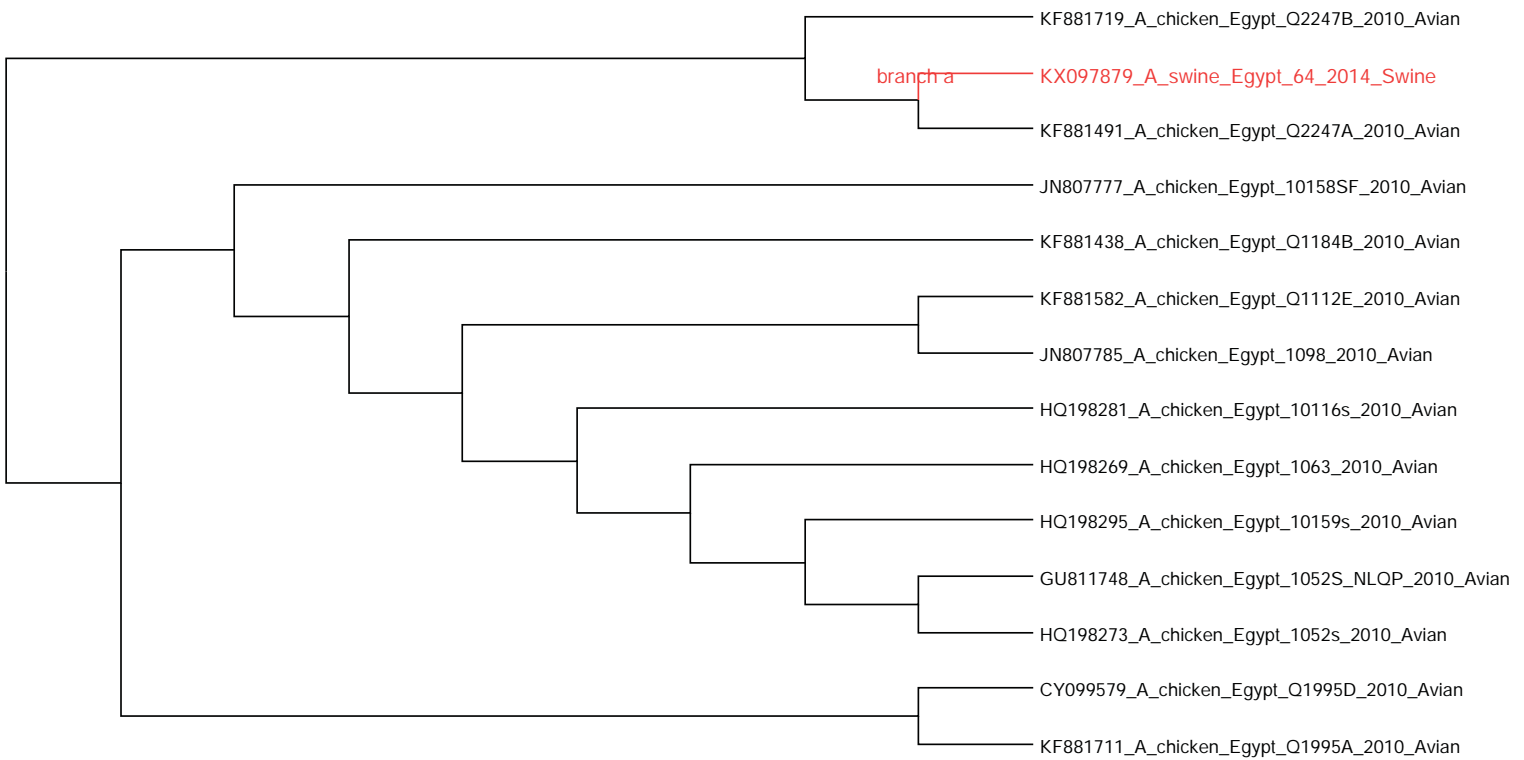

# HA-Group22

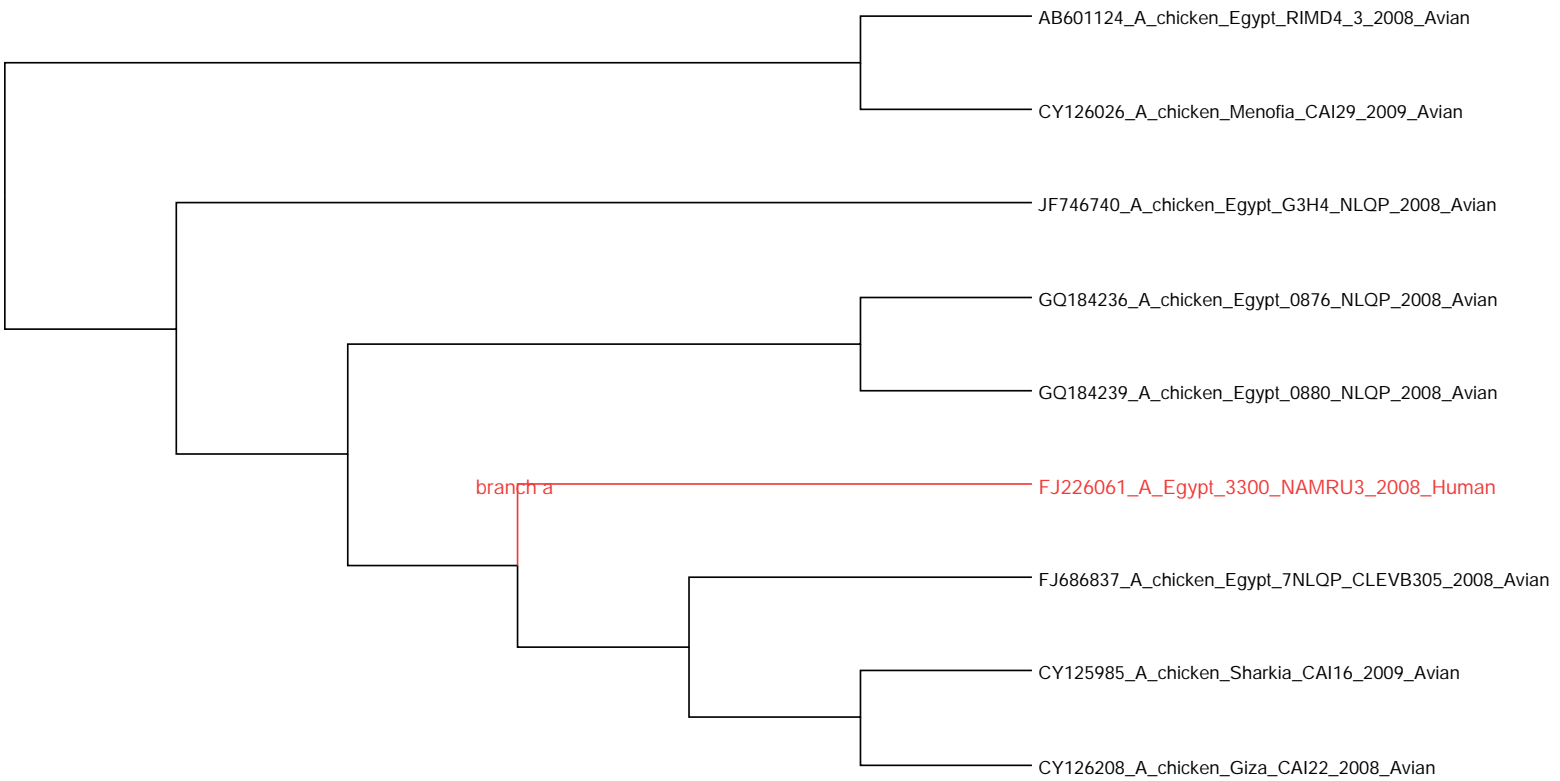

# HA-Group23

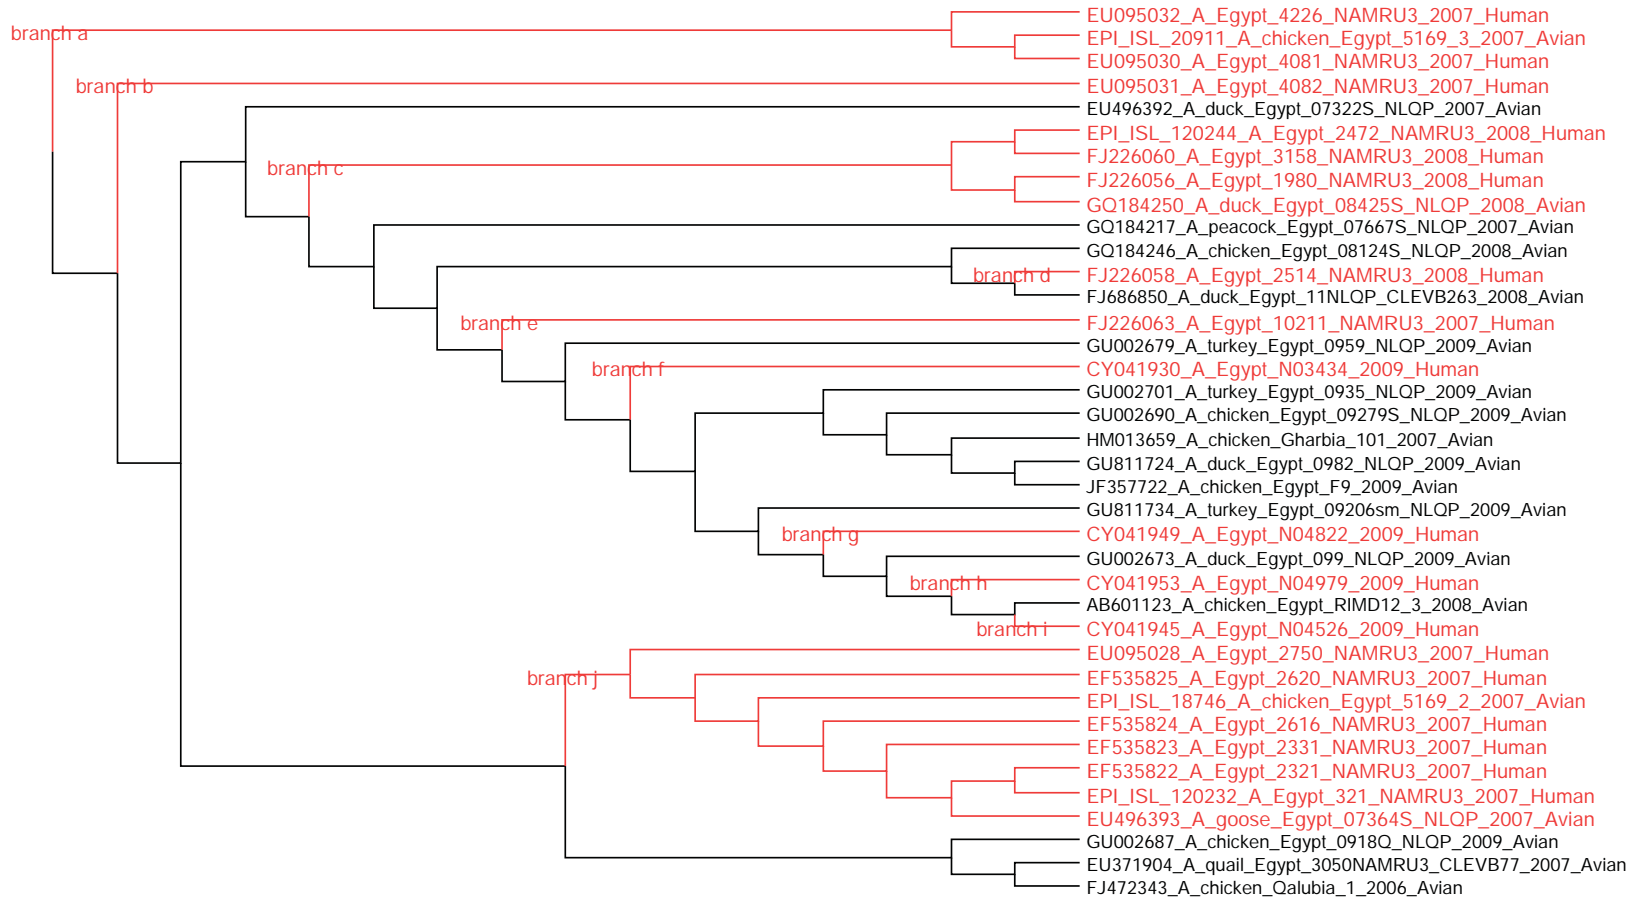

# HA-Group24

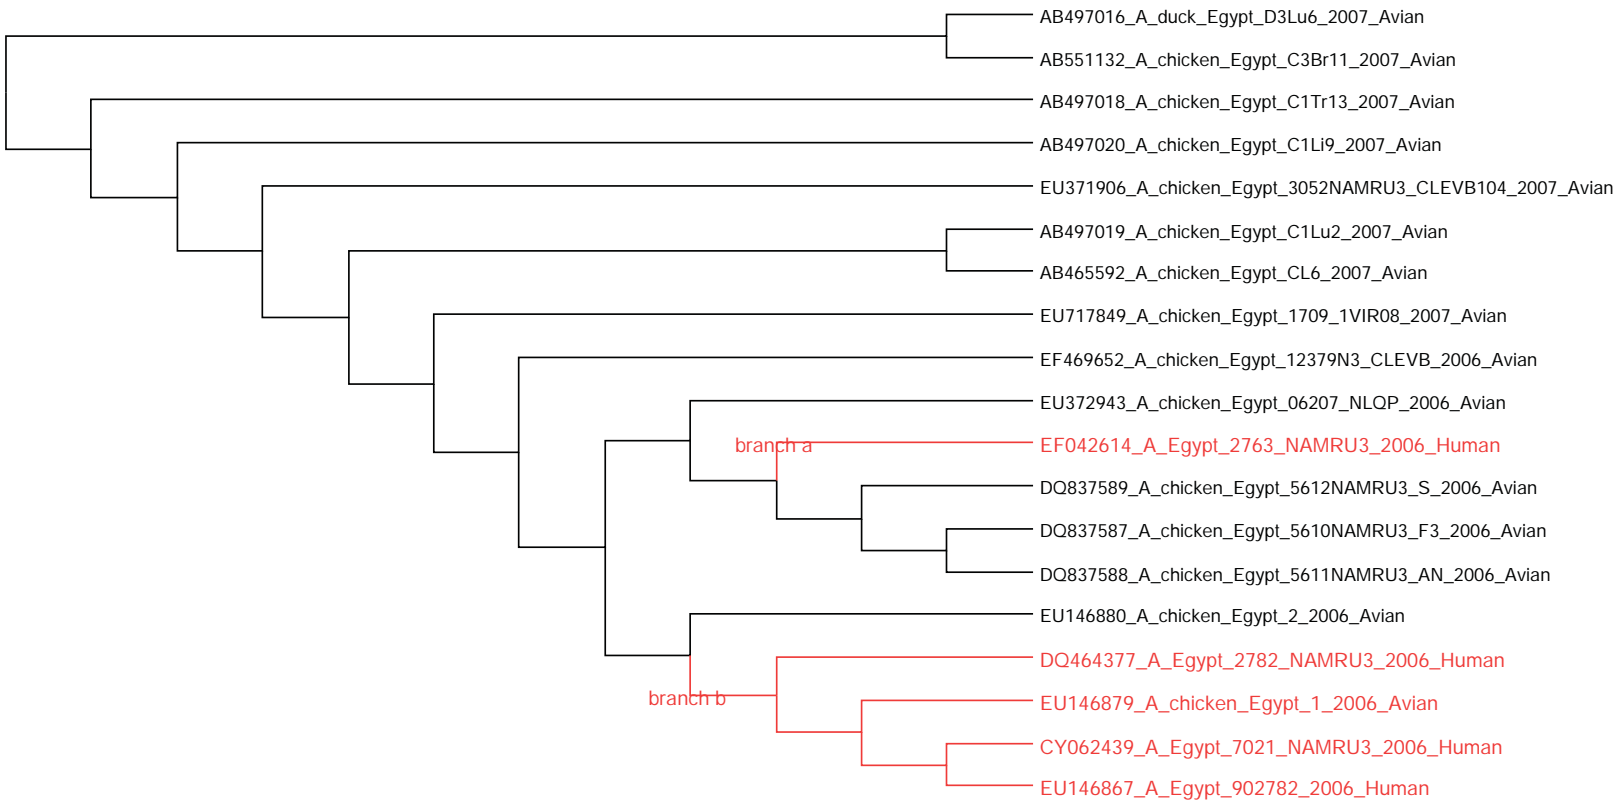



# HA-Group25

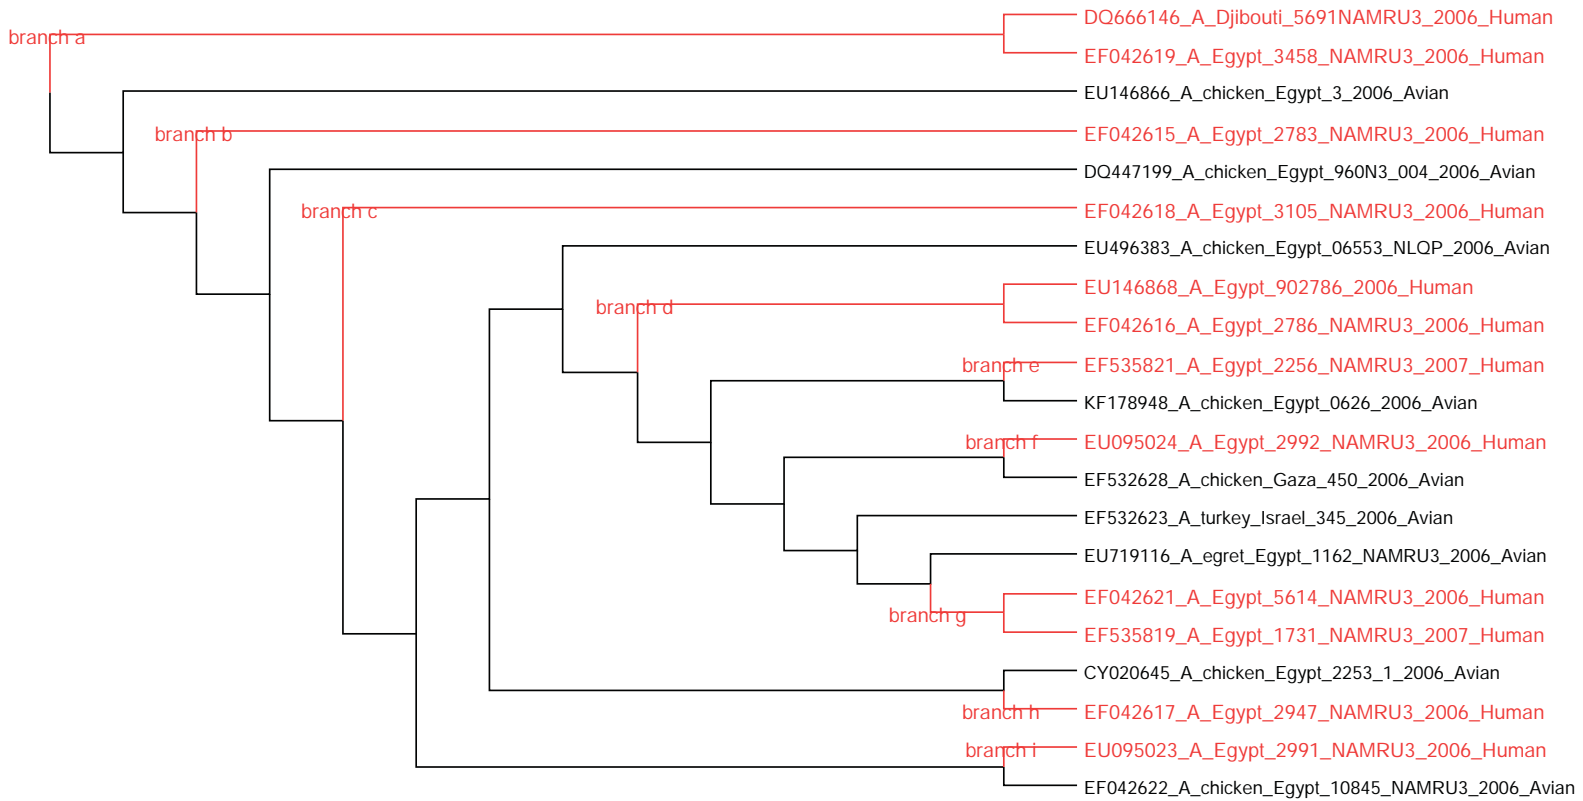

# HA-Group26

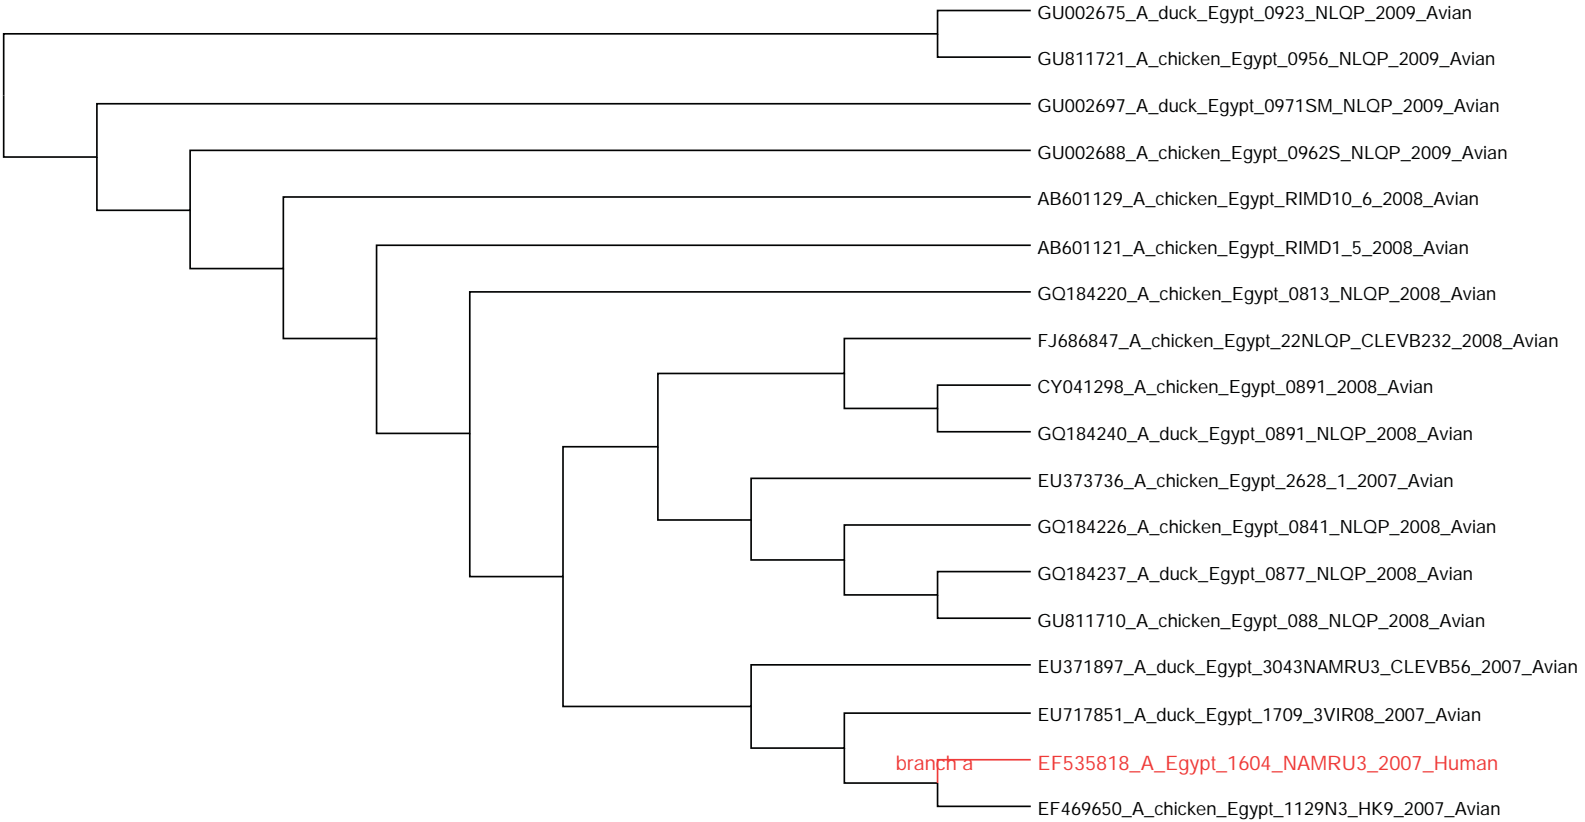

# HA-Group27

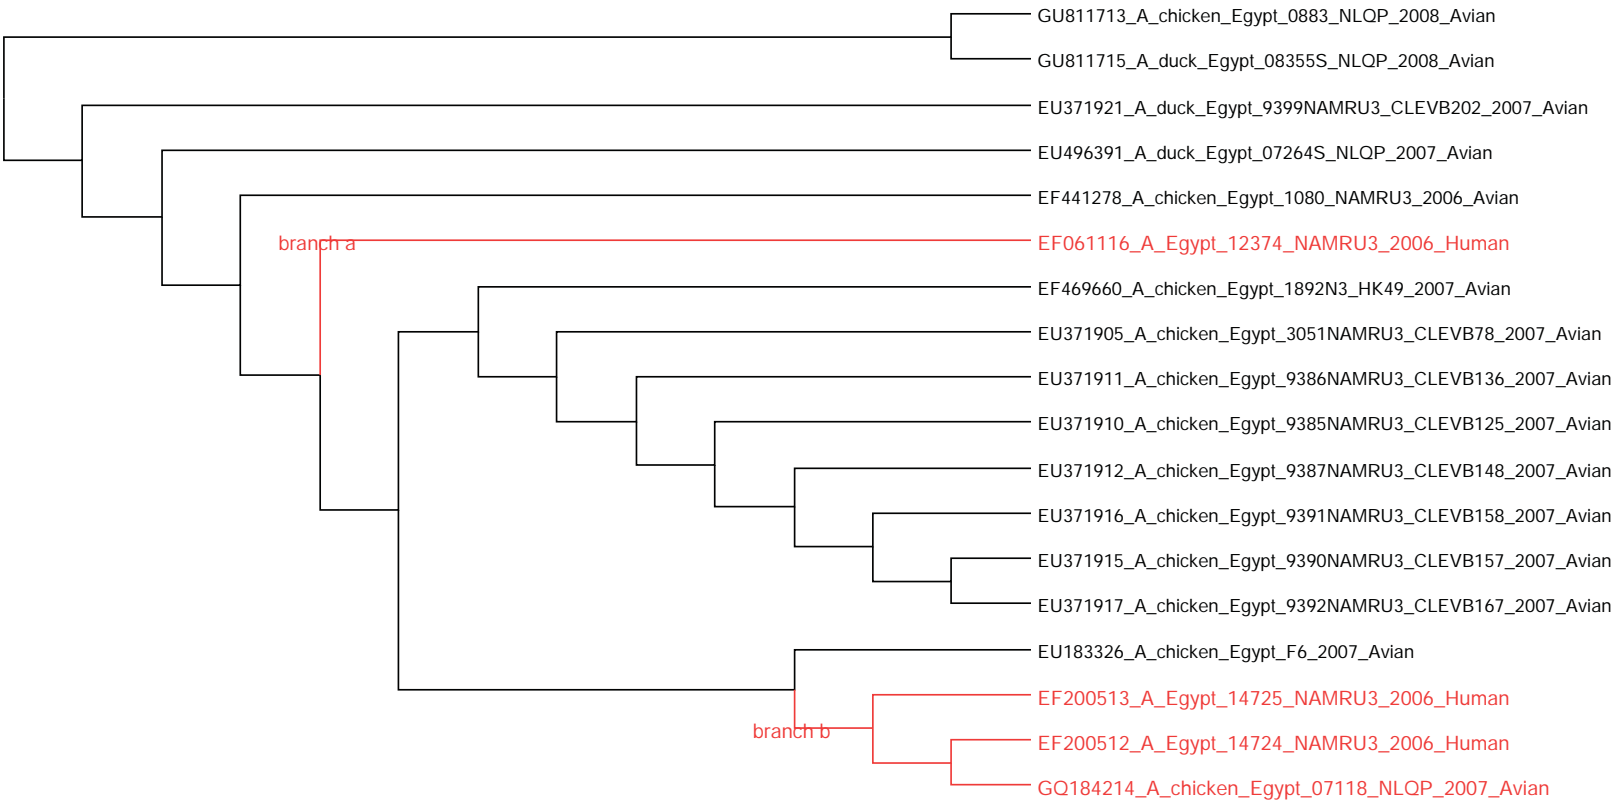

# HA-Group28

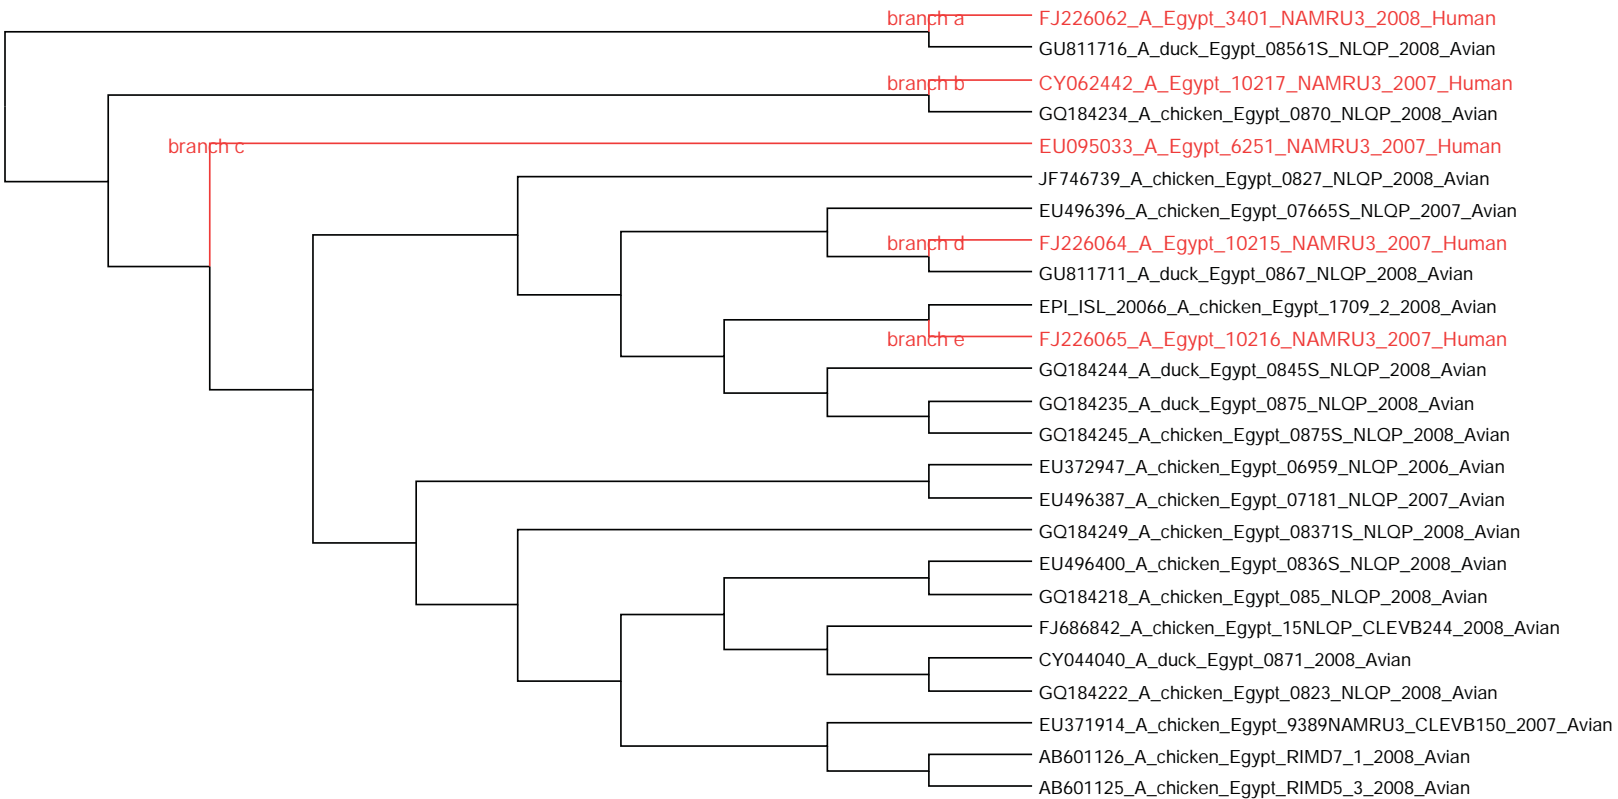

# HA-Group29

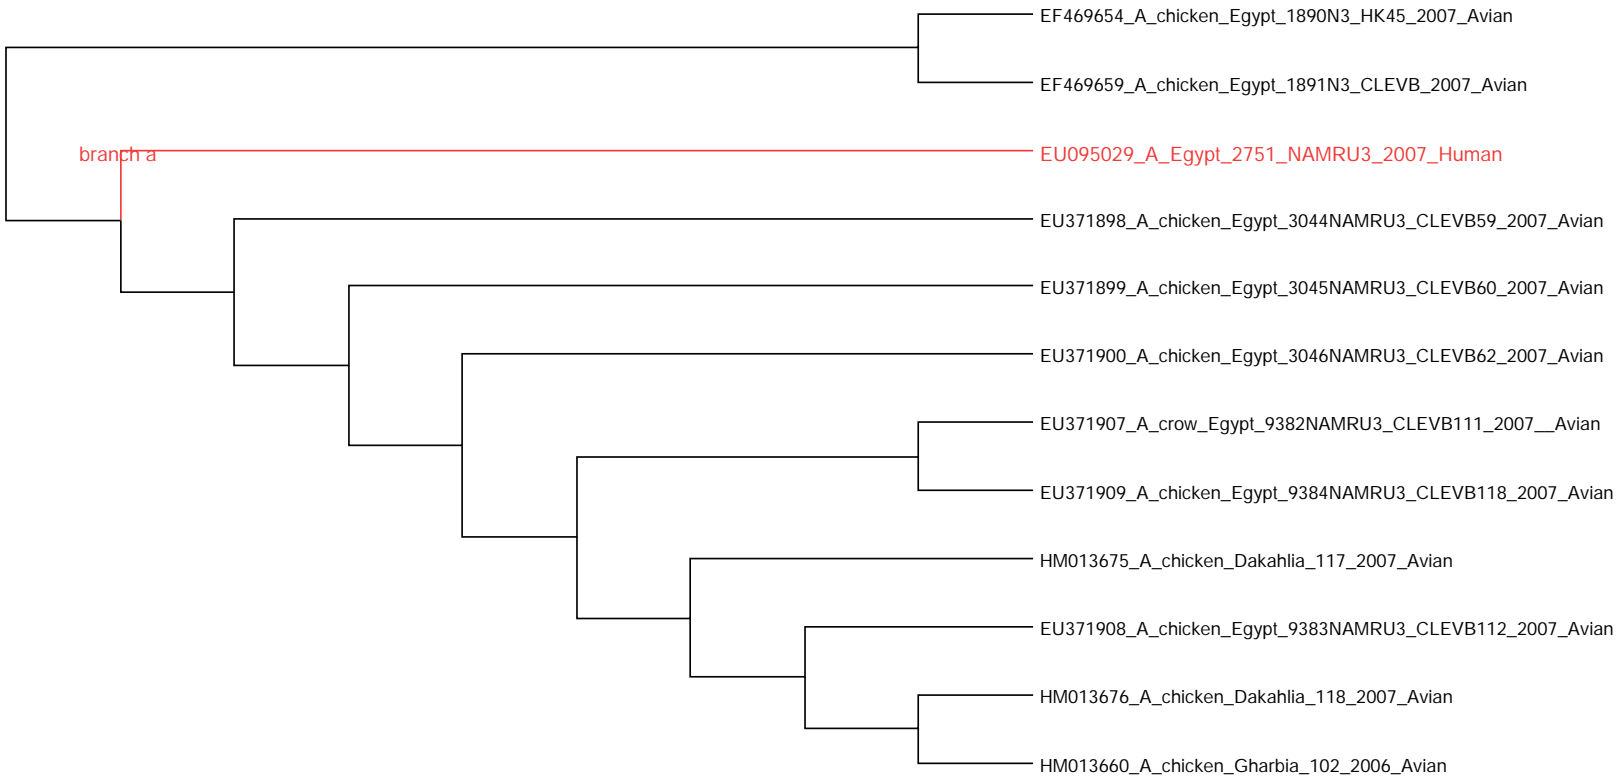

# HA-Group30

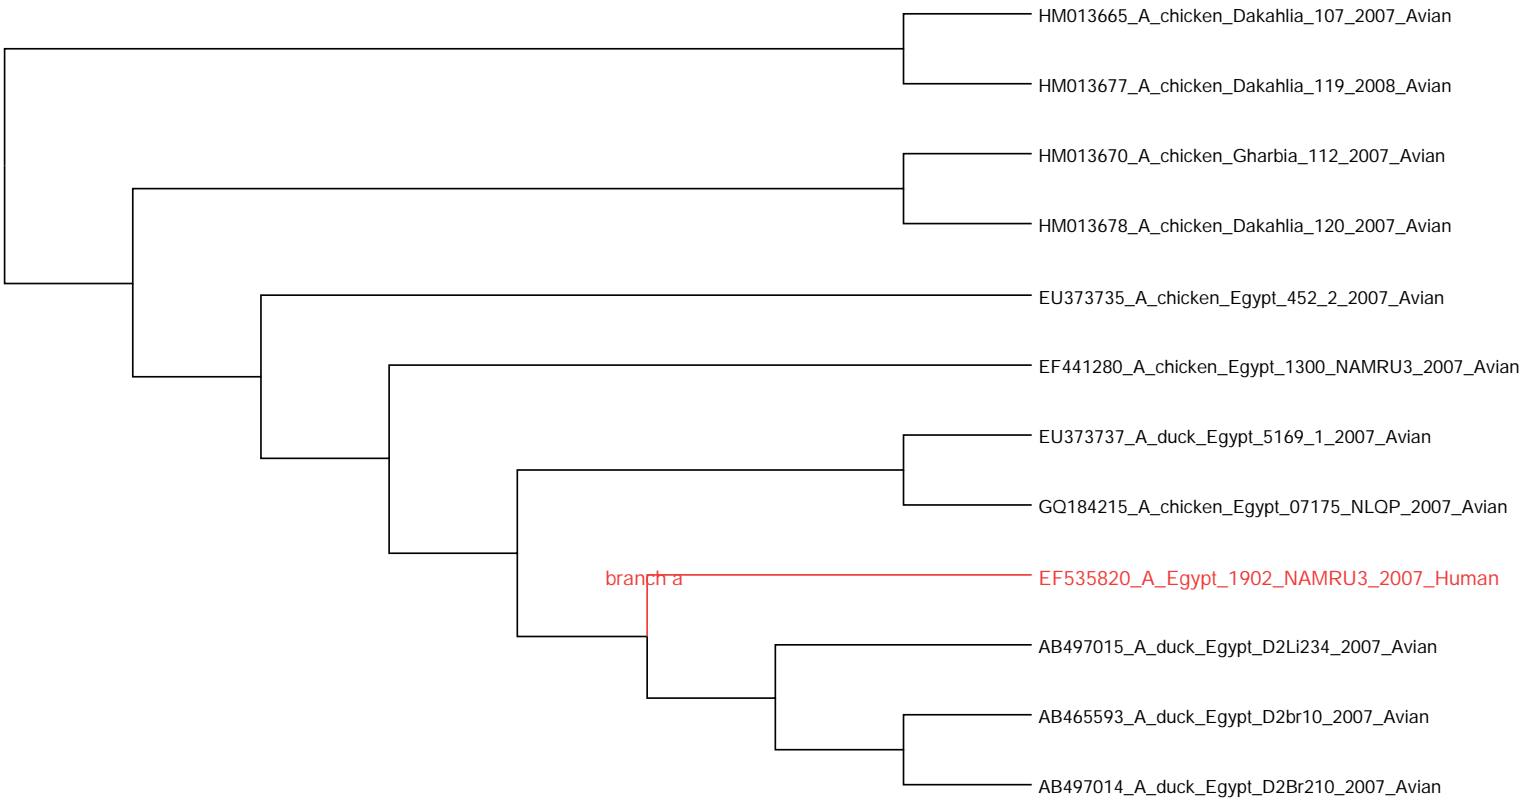

# HA-Group31

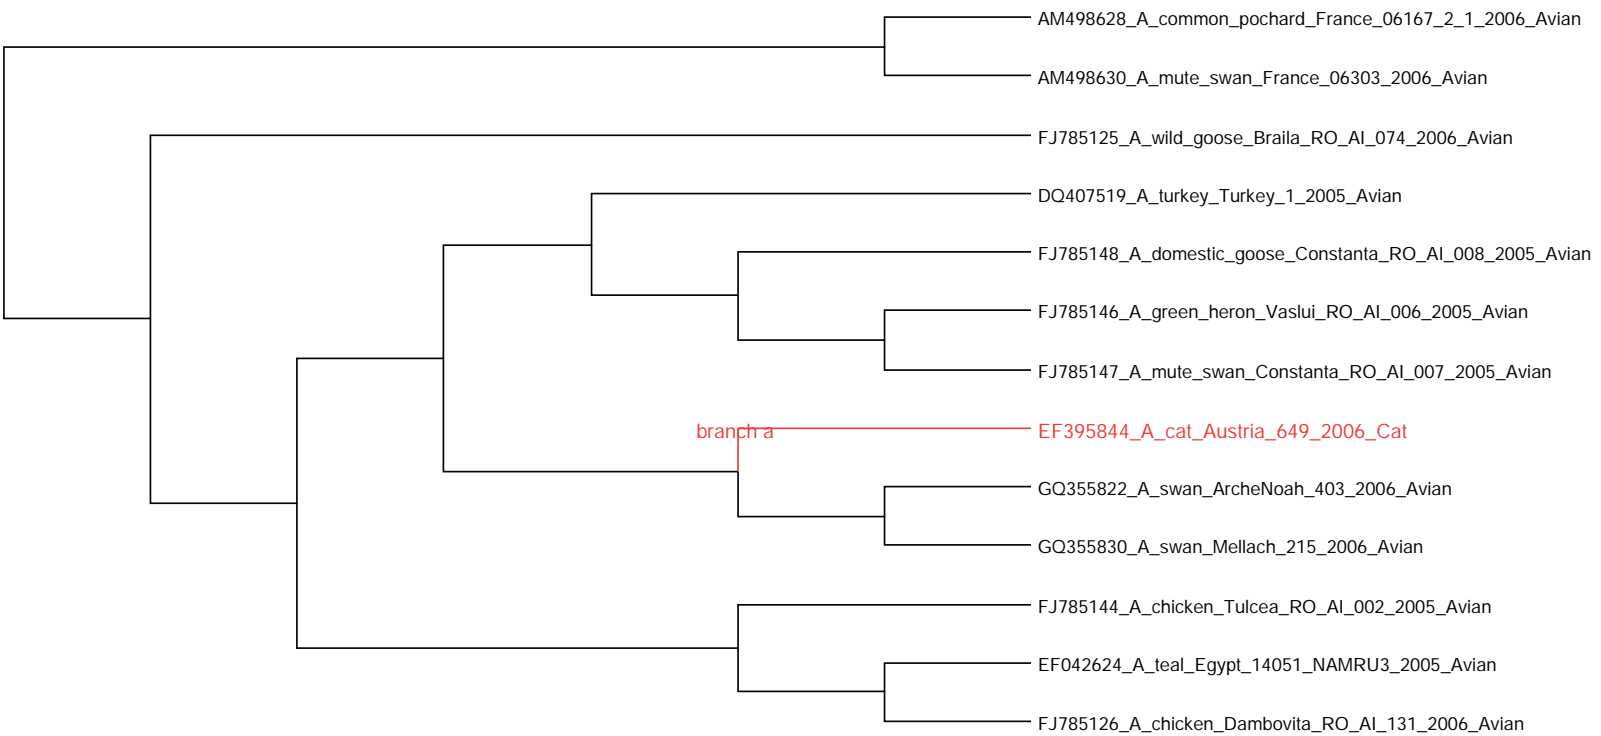

# HA-Group32

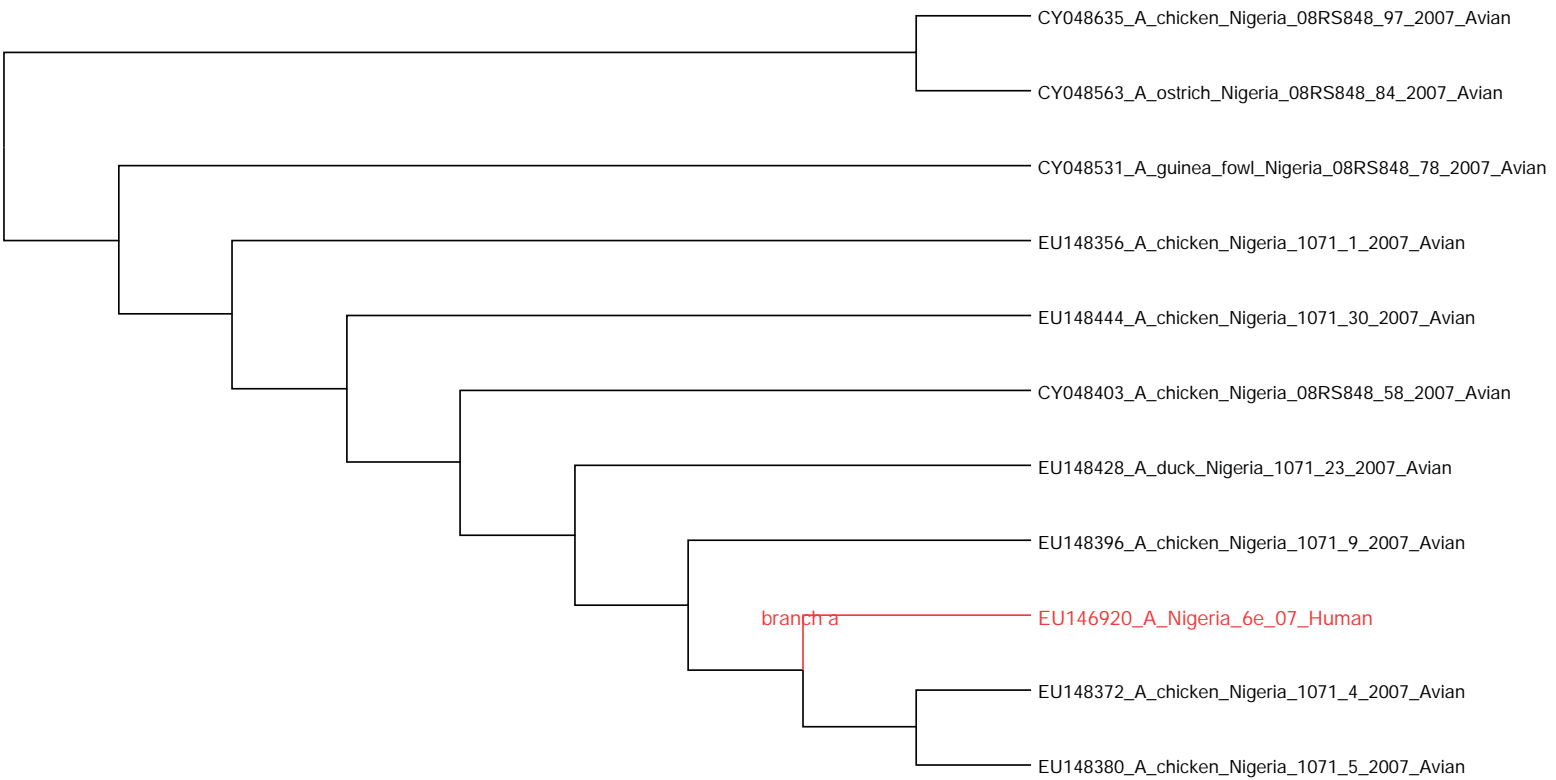



# HA-Group33

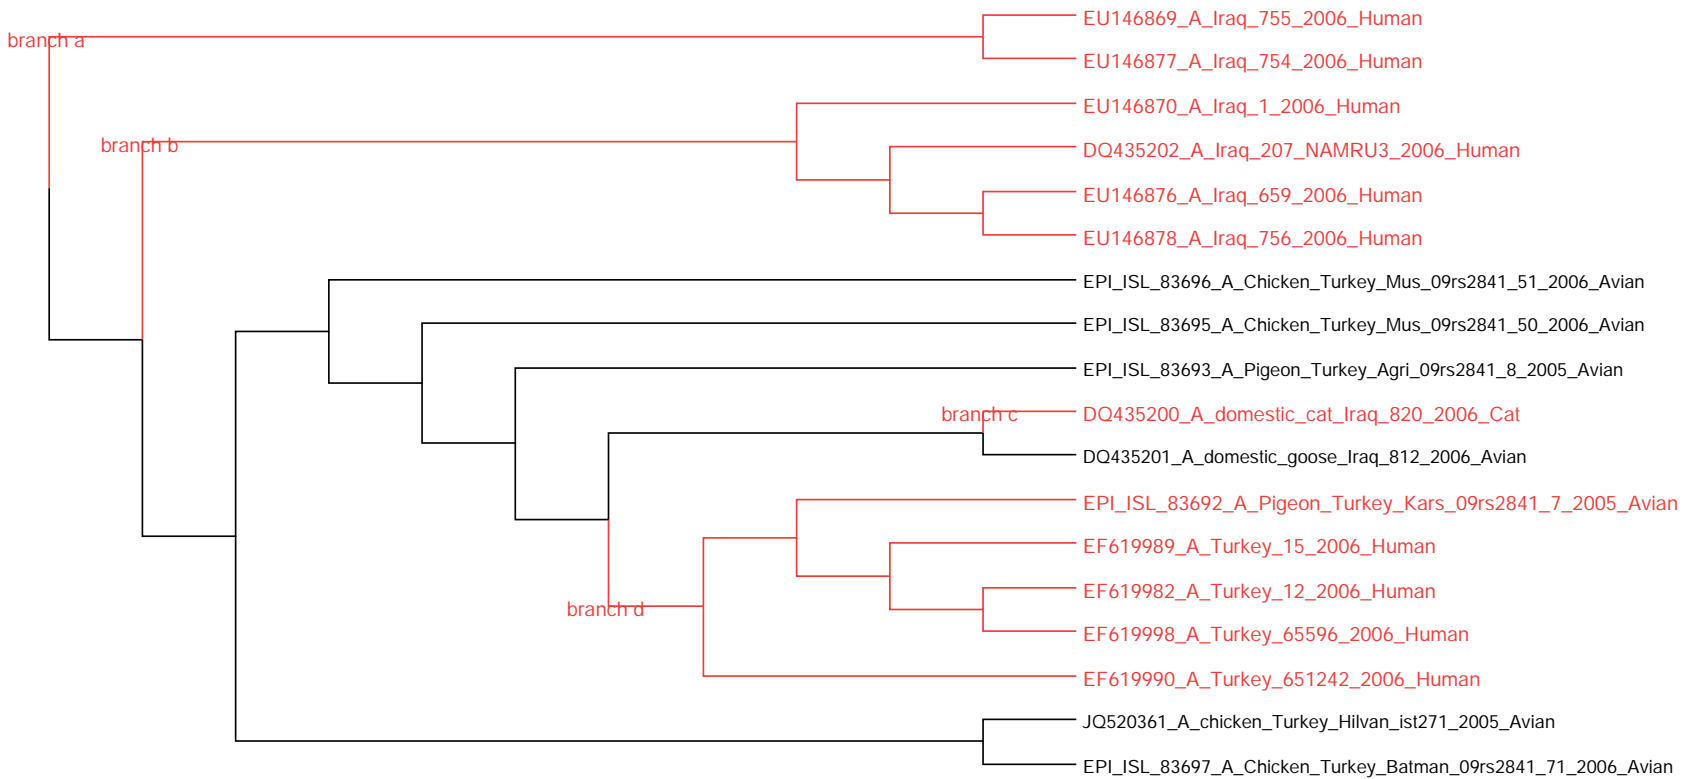

# HA-Group34

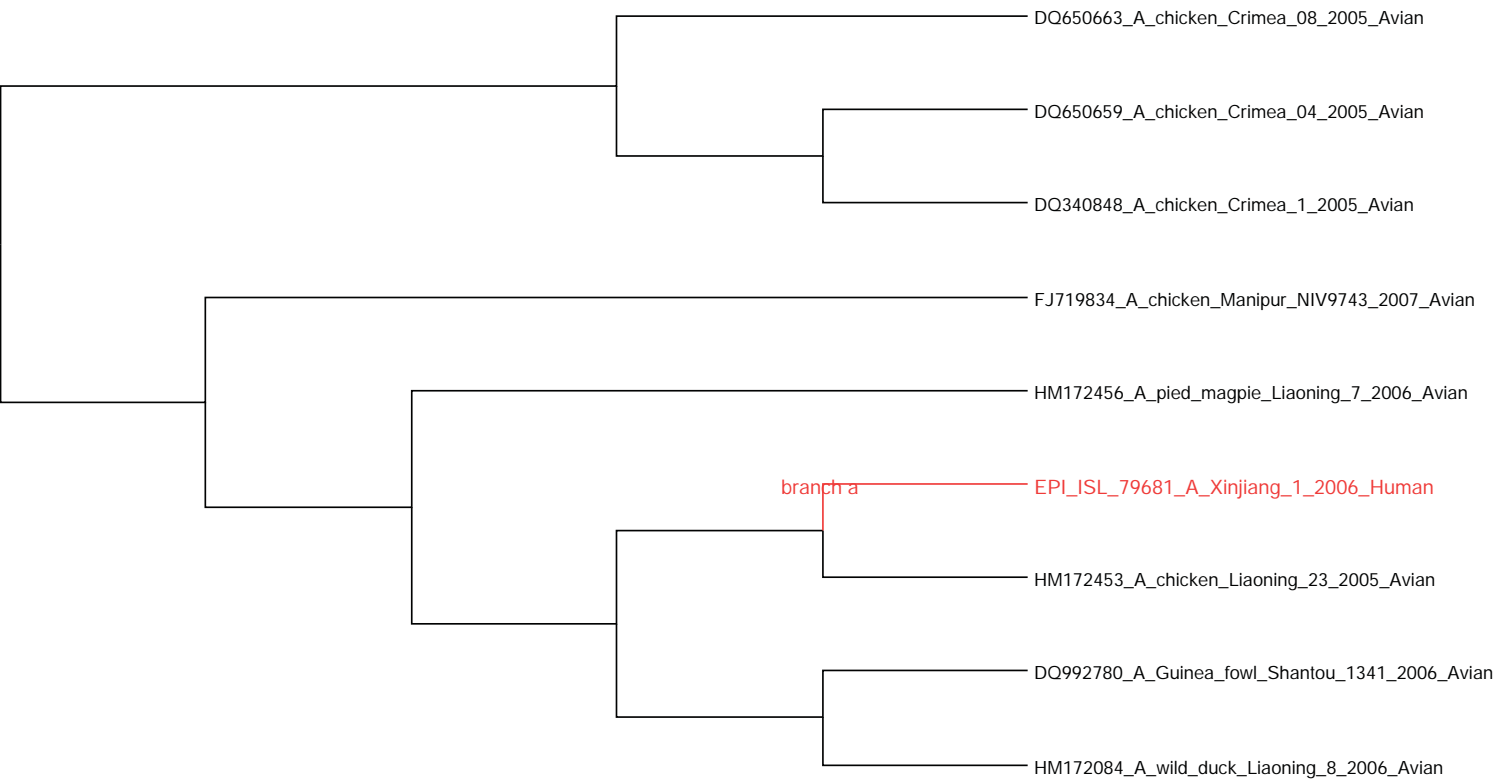

# HA-Group35

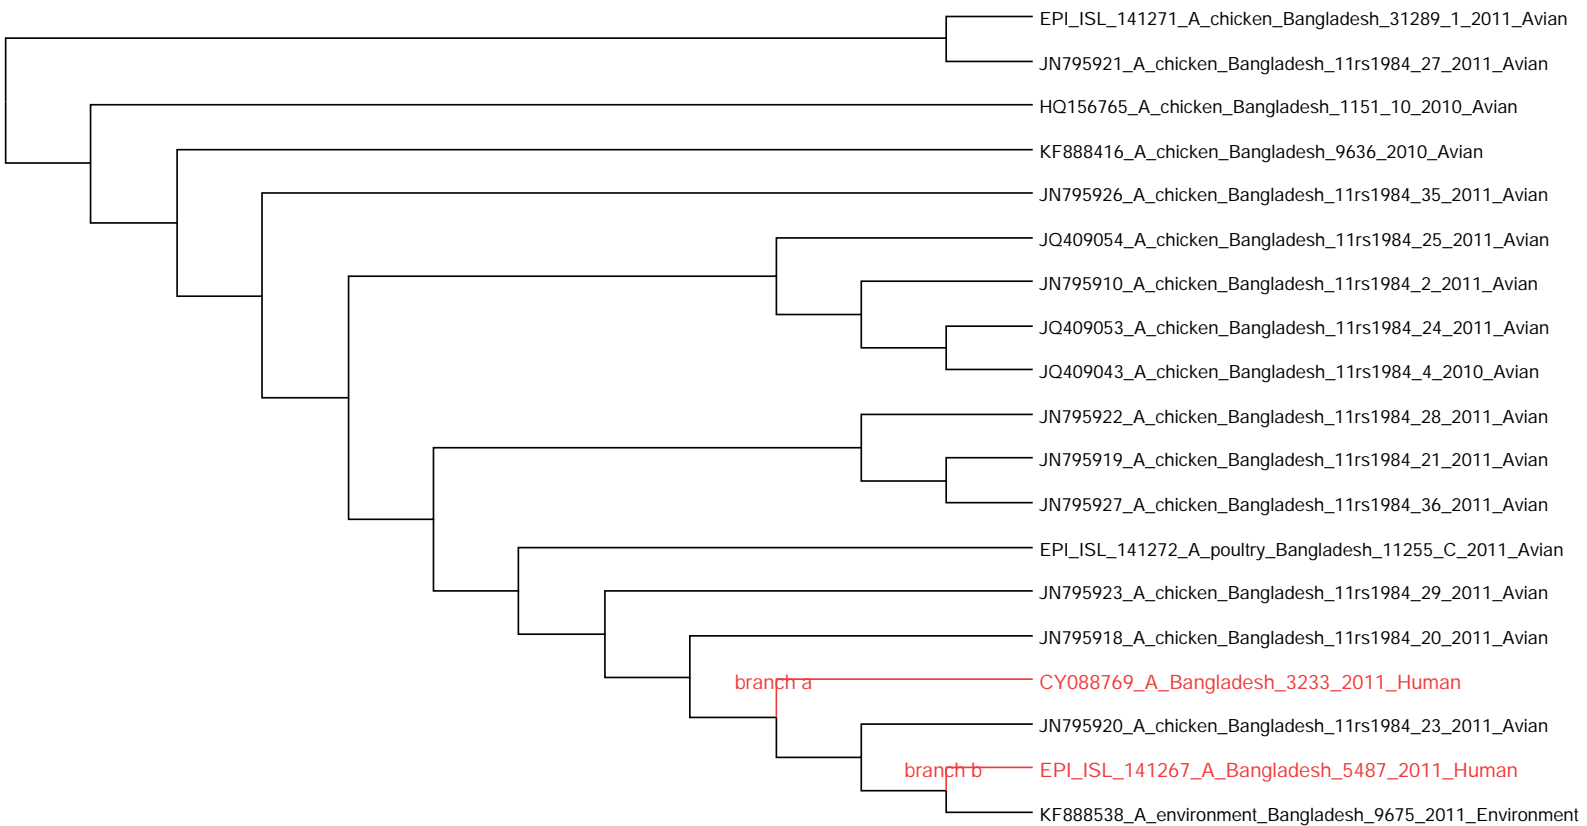

# HA-Group36

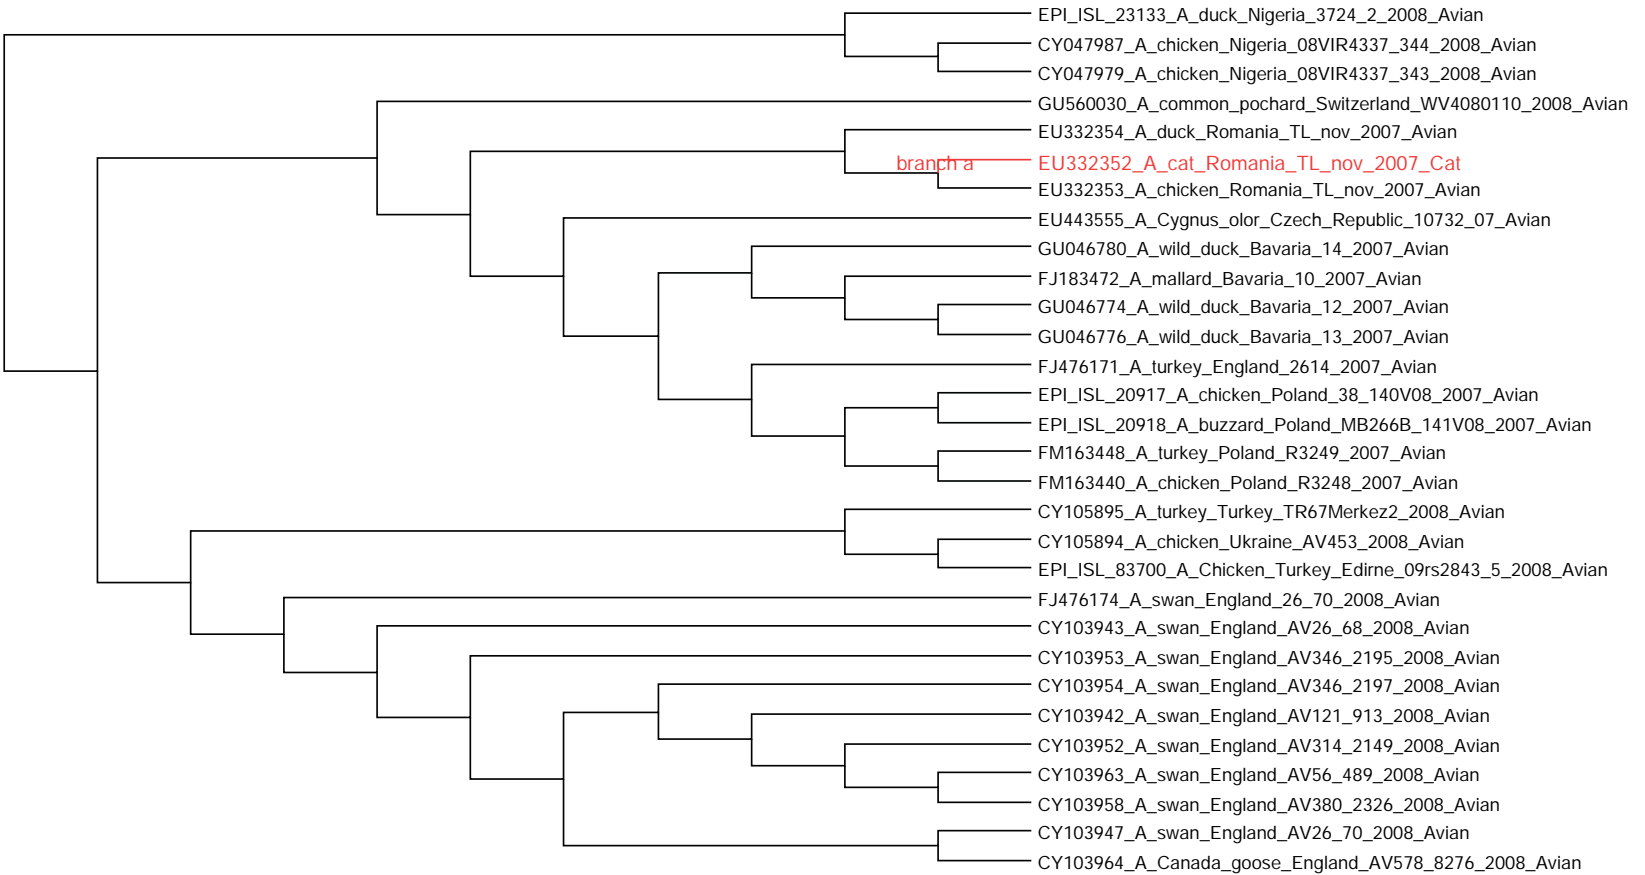

# HA-Group37

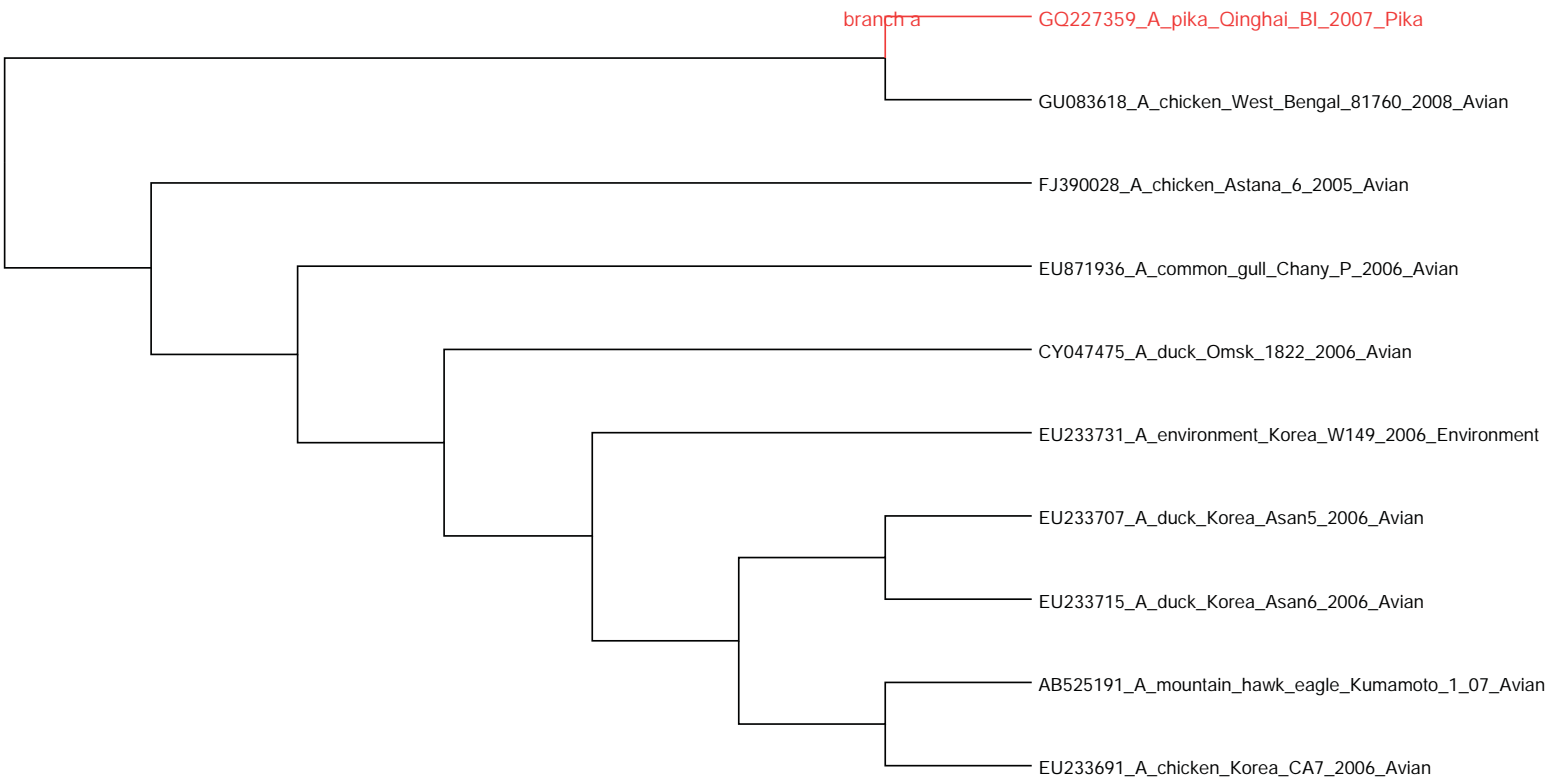

# HA-Group38

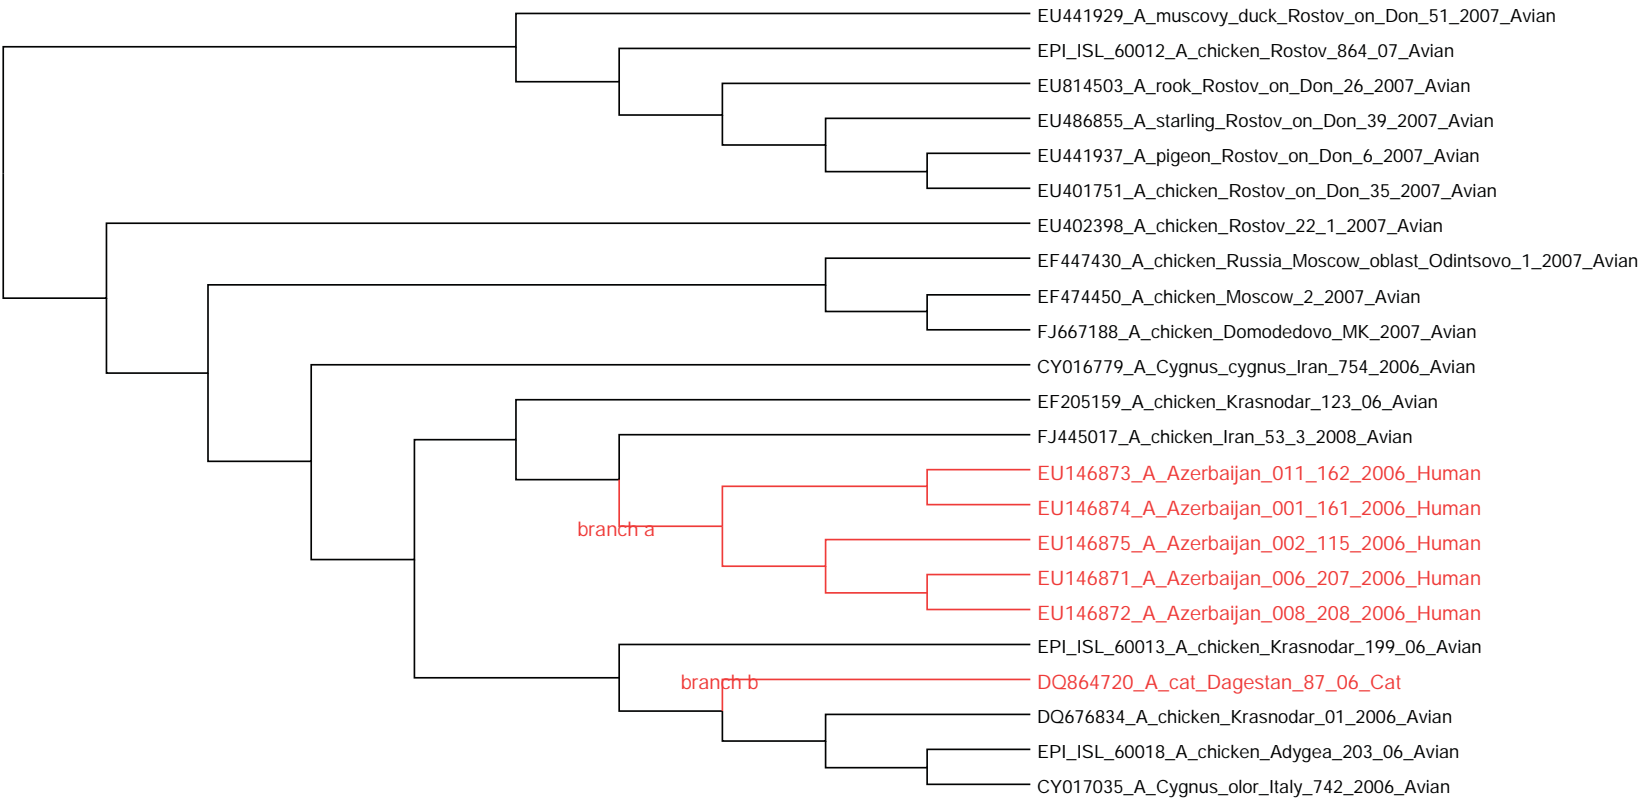

# HA-Group39

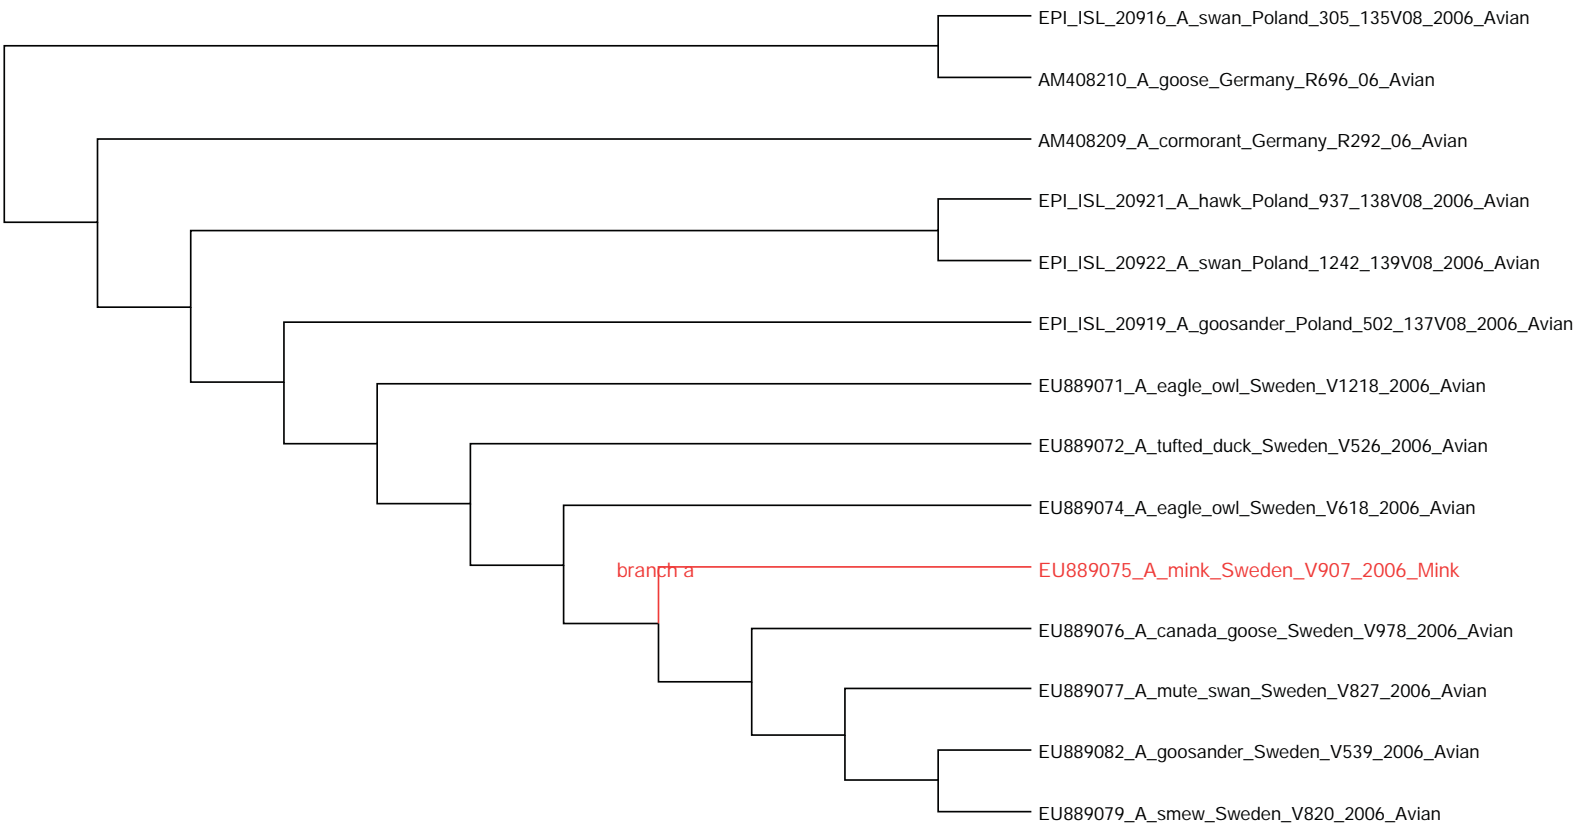

# HA-Group40

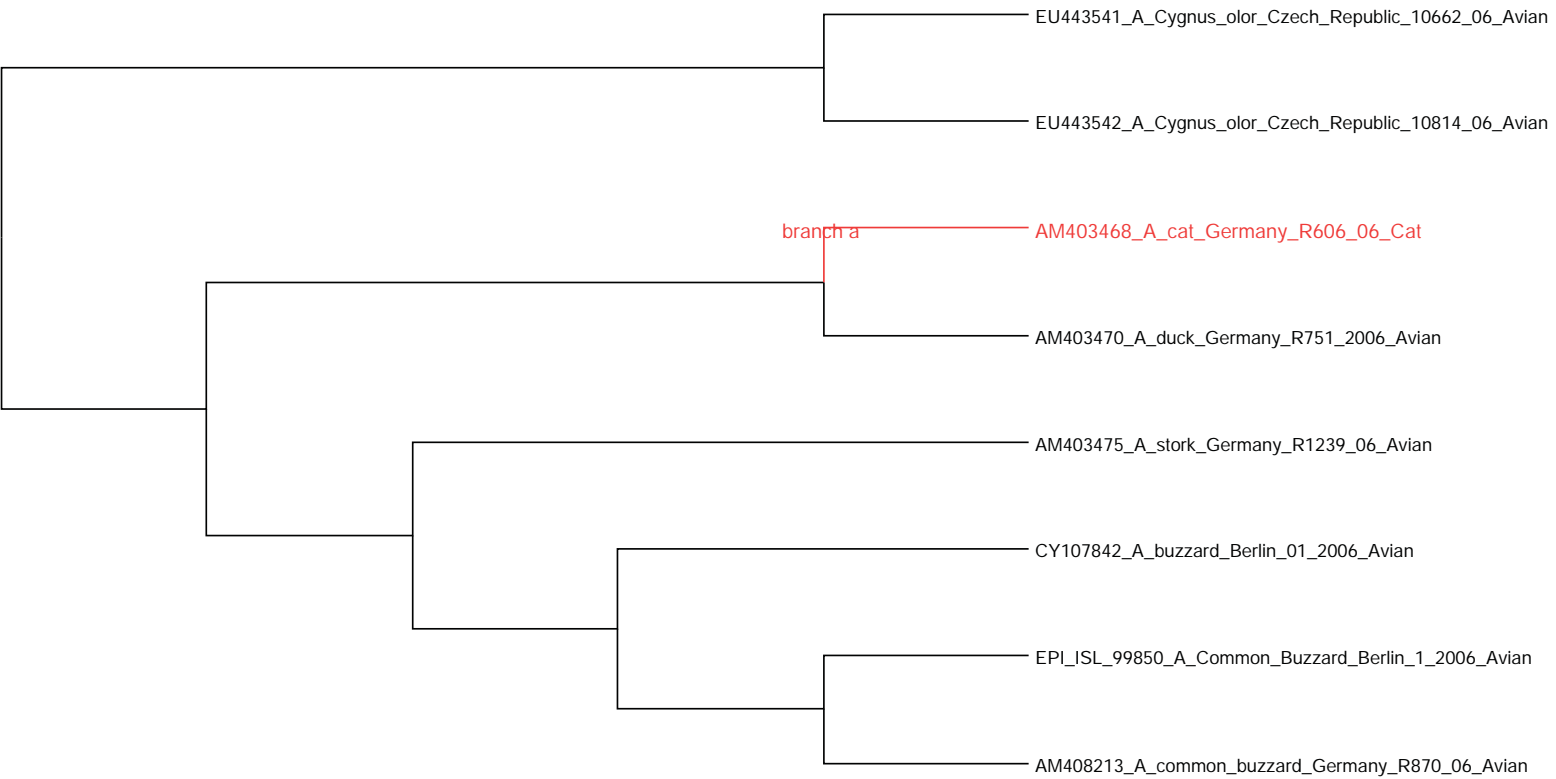



# HA-Group41

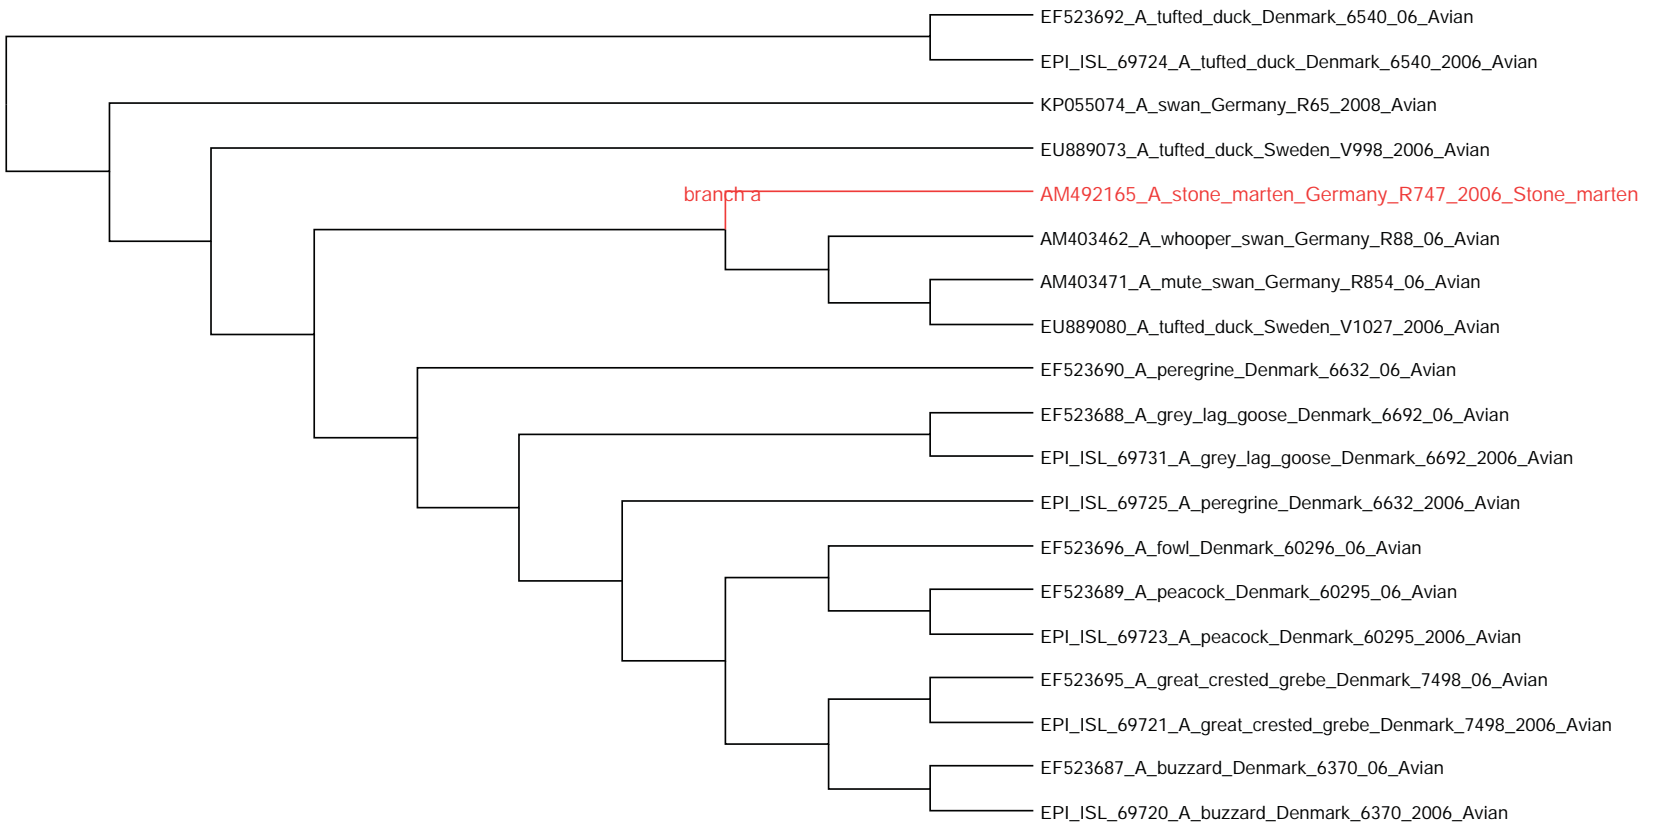

# HA-Group42

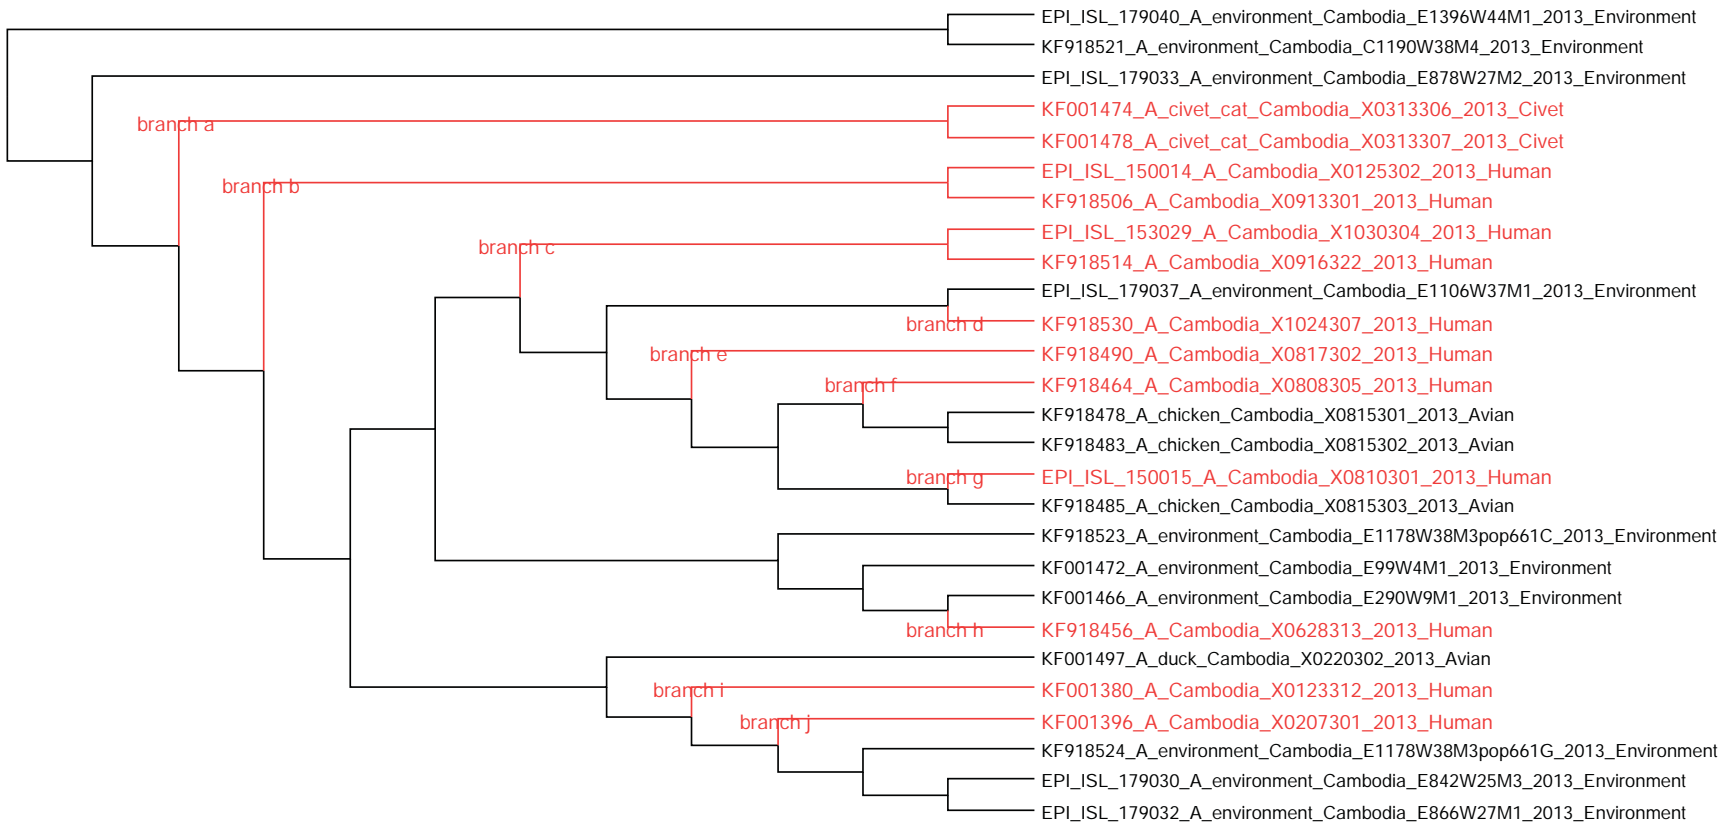

# HA-Group43

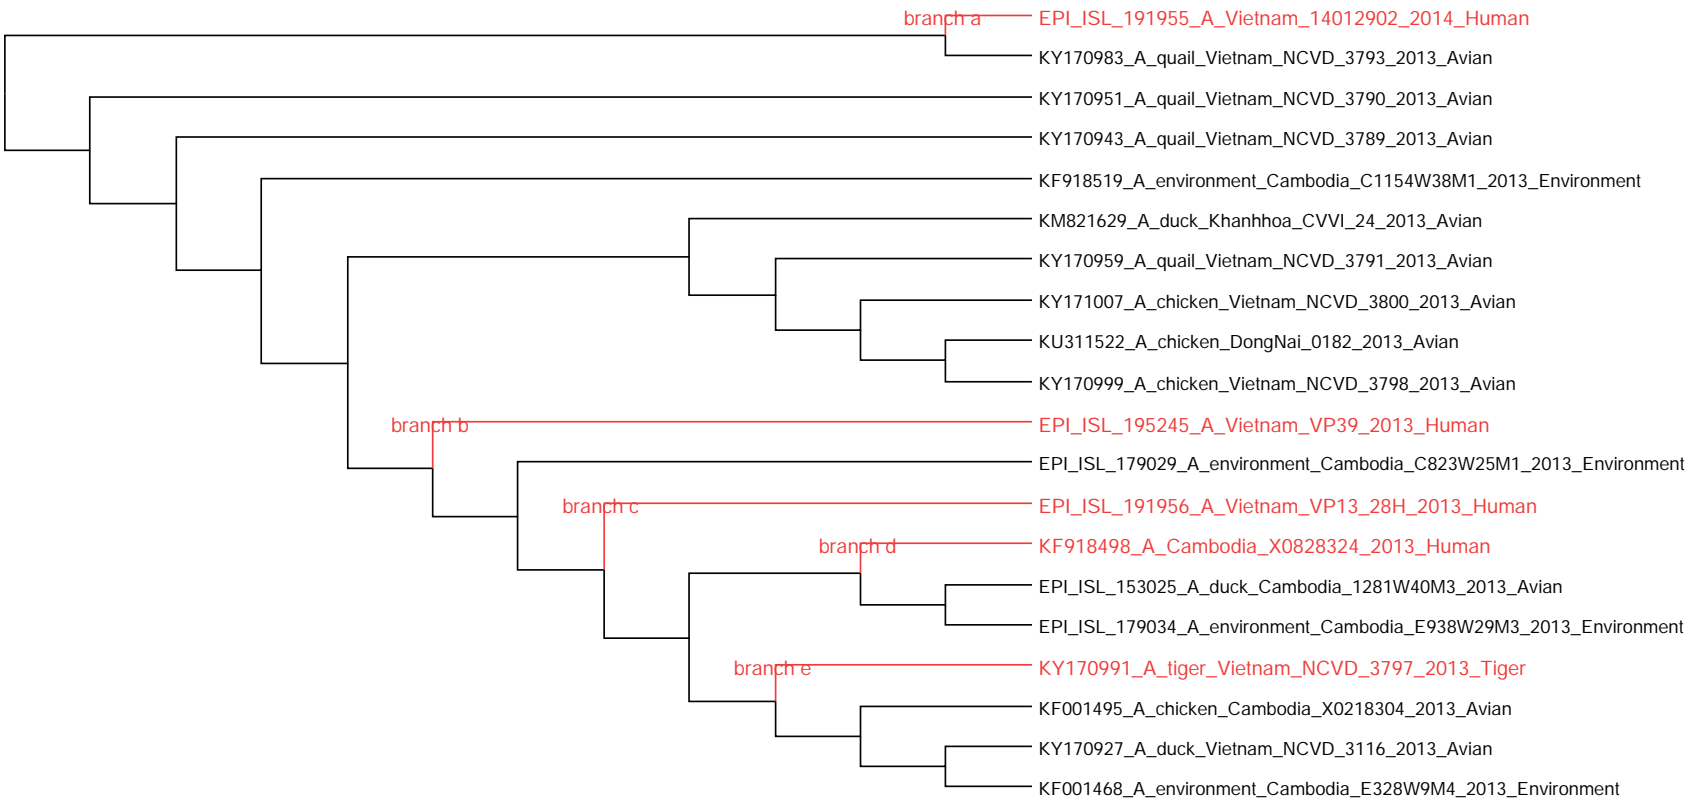

# HA-Group44

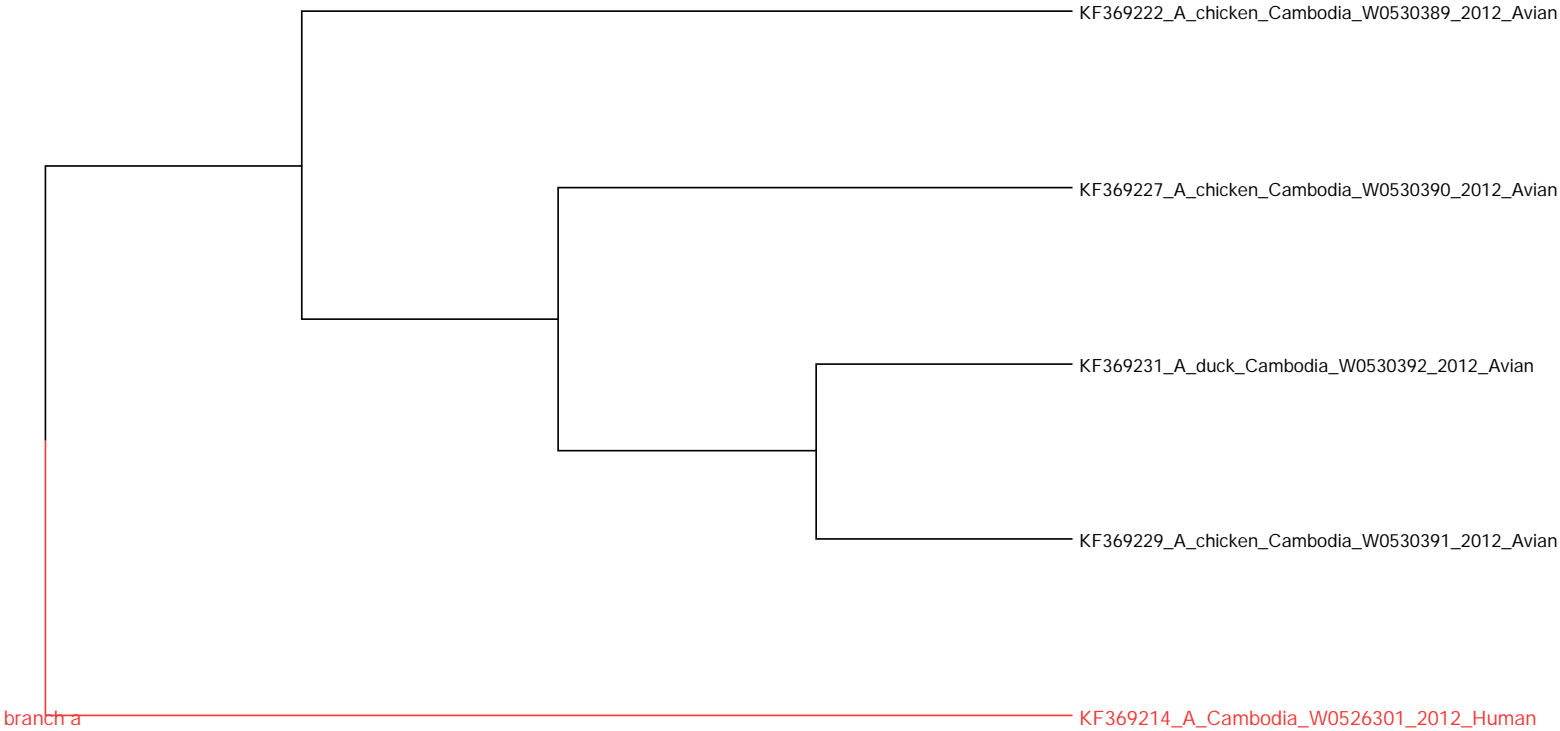

# HA-Group45

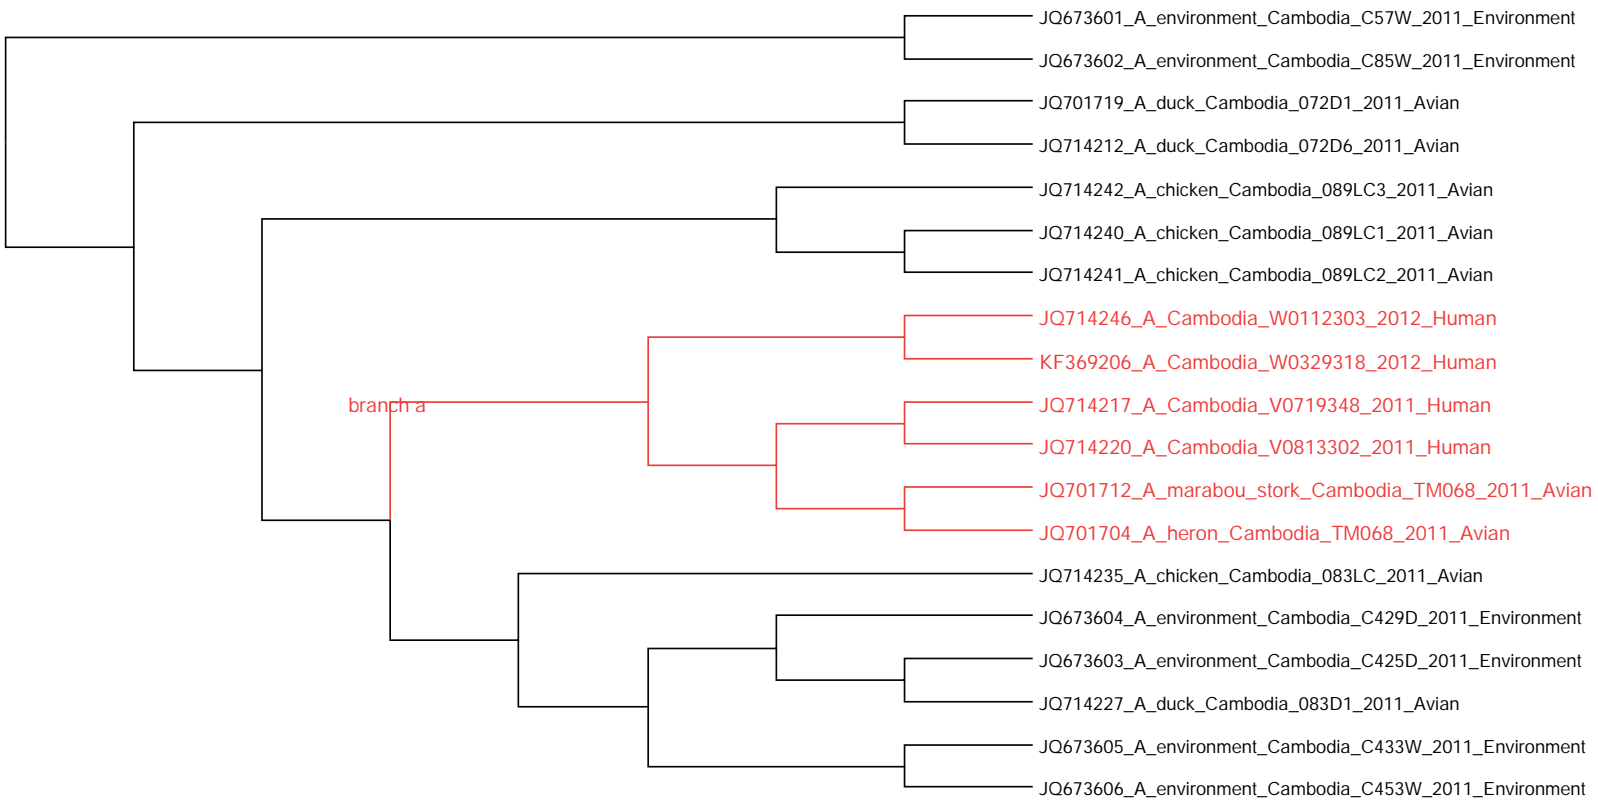

# HA-Group46

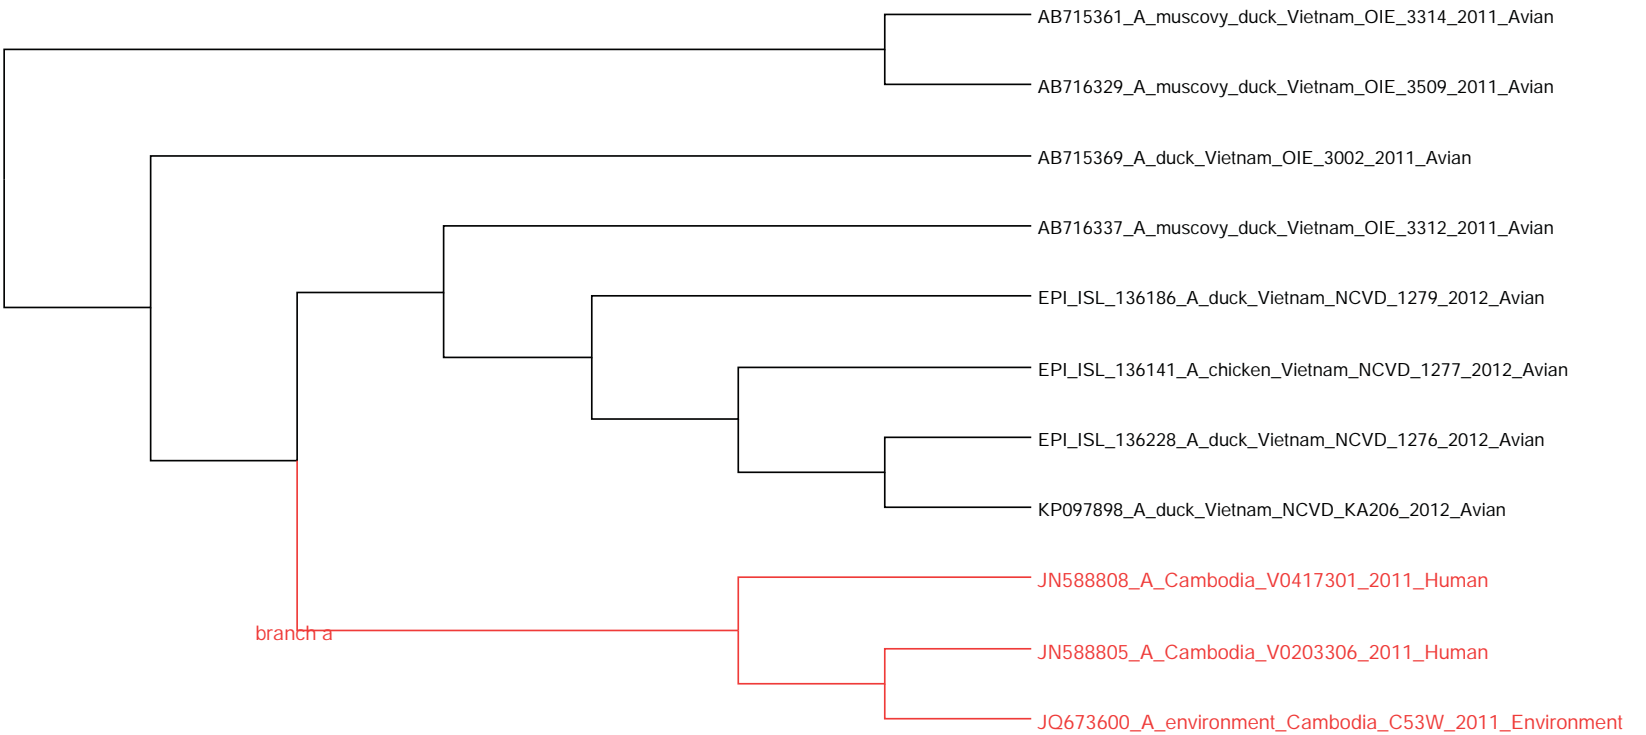

# HA-Group47

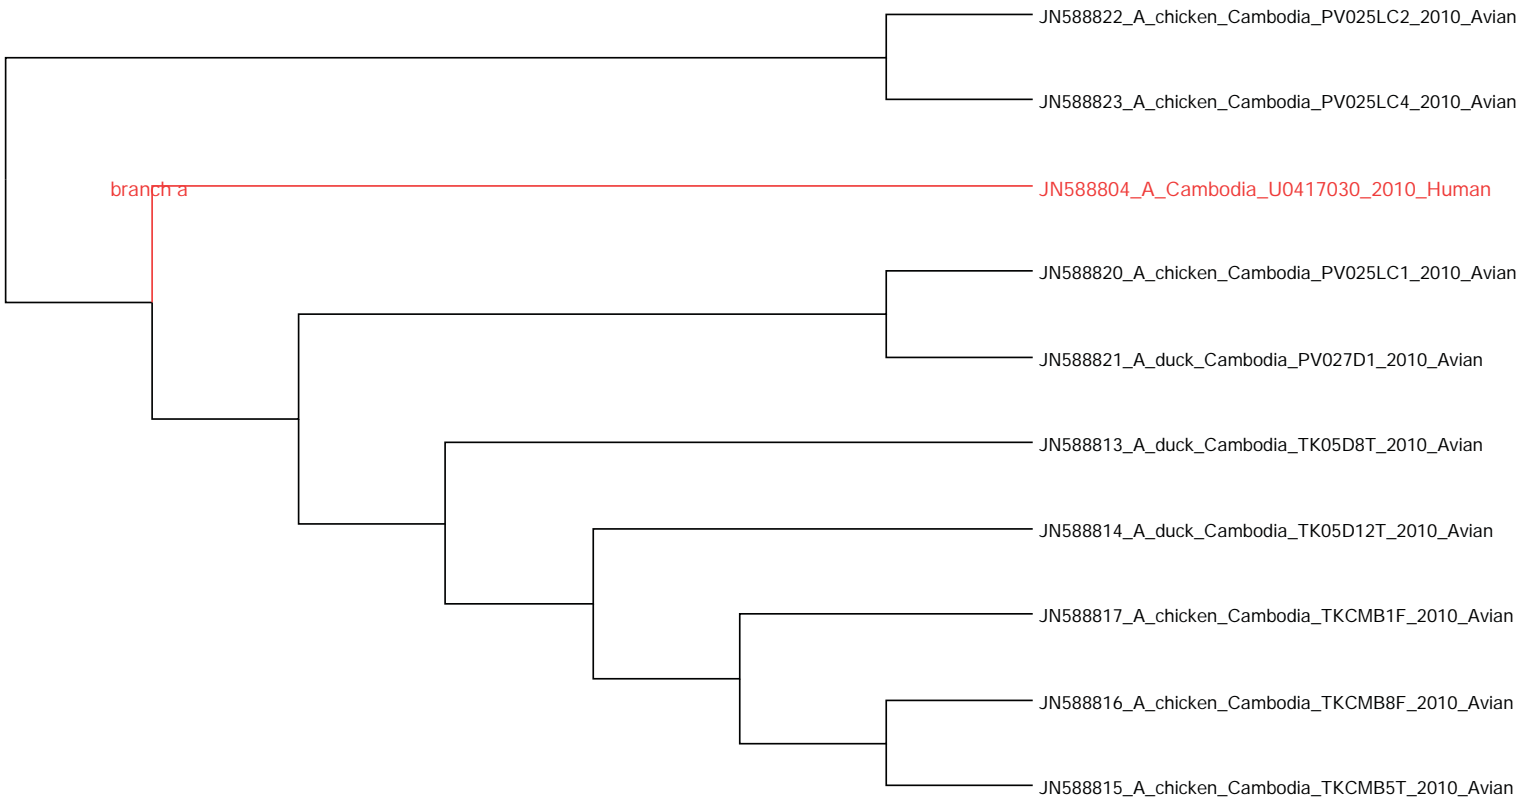

# HA-Group48

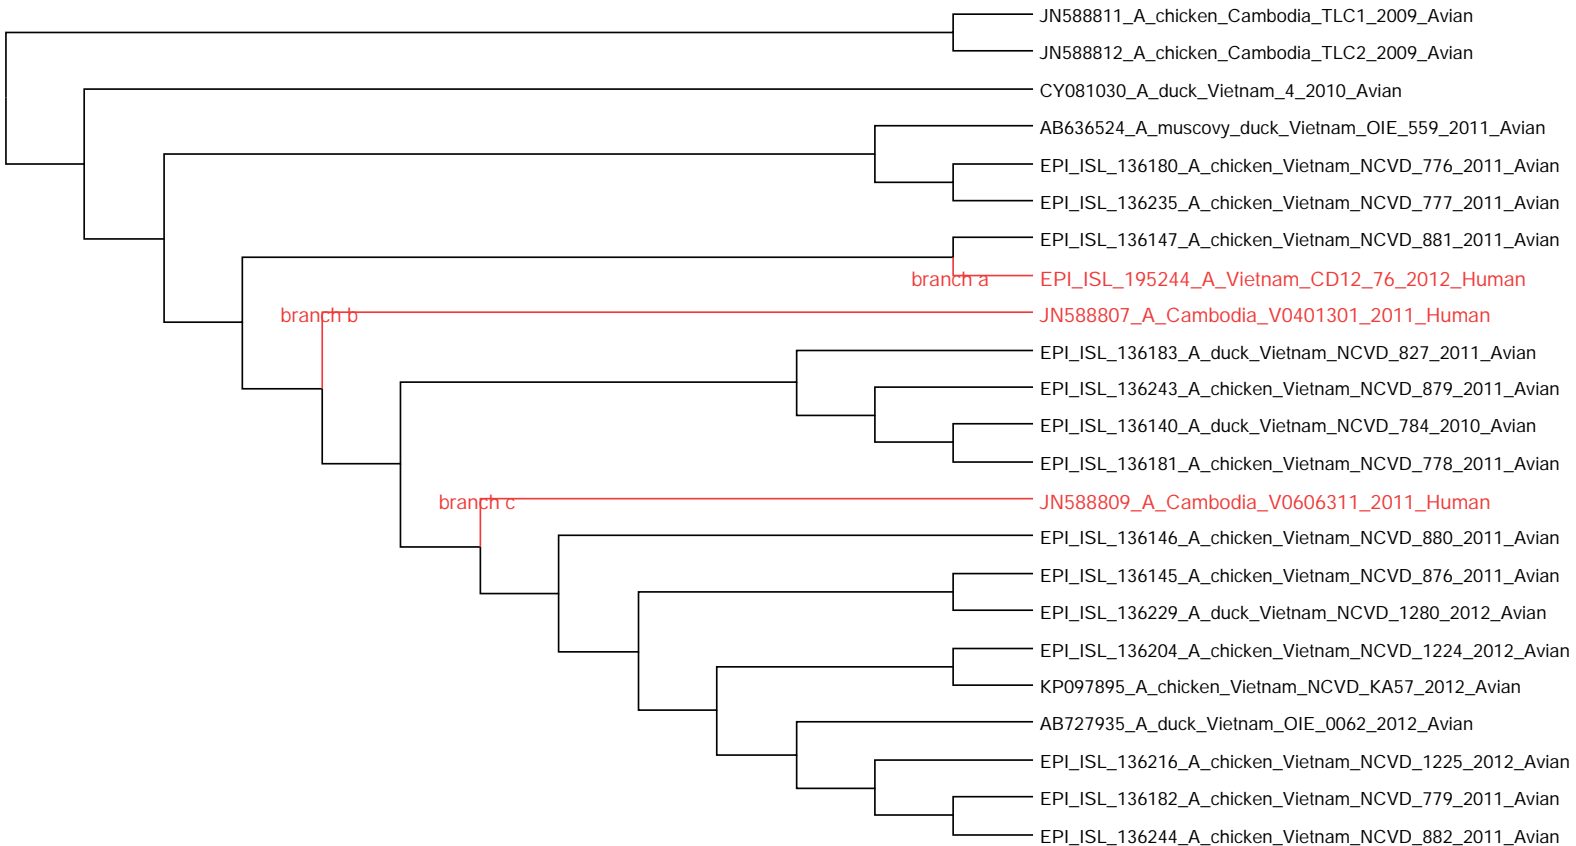



# HA-Group49

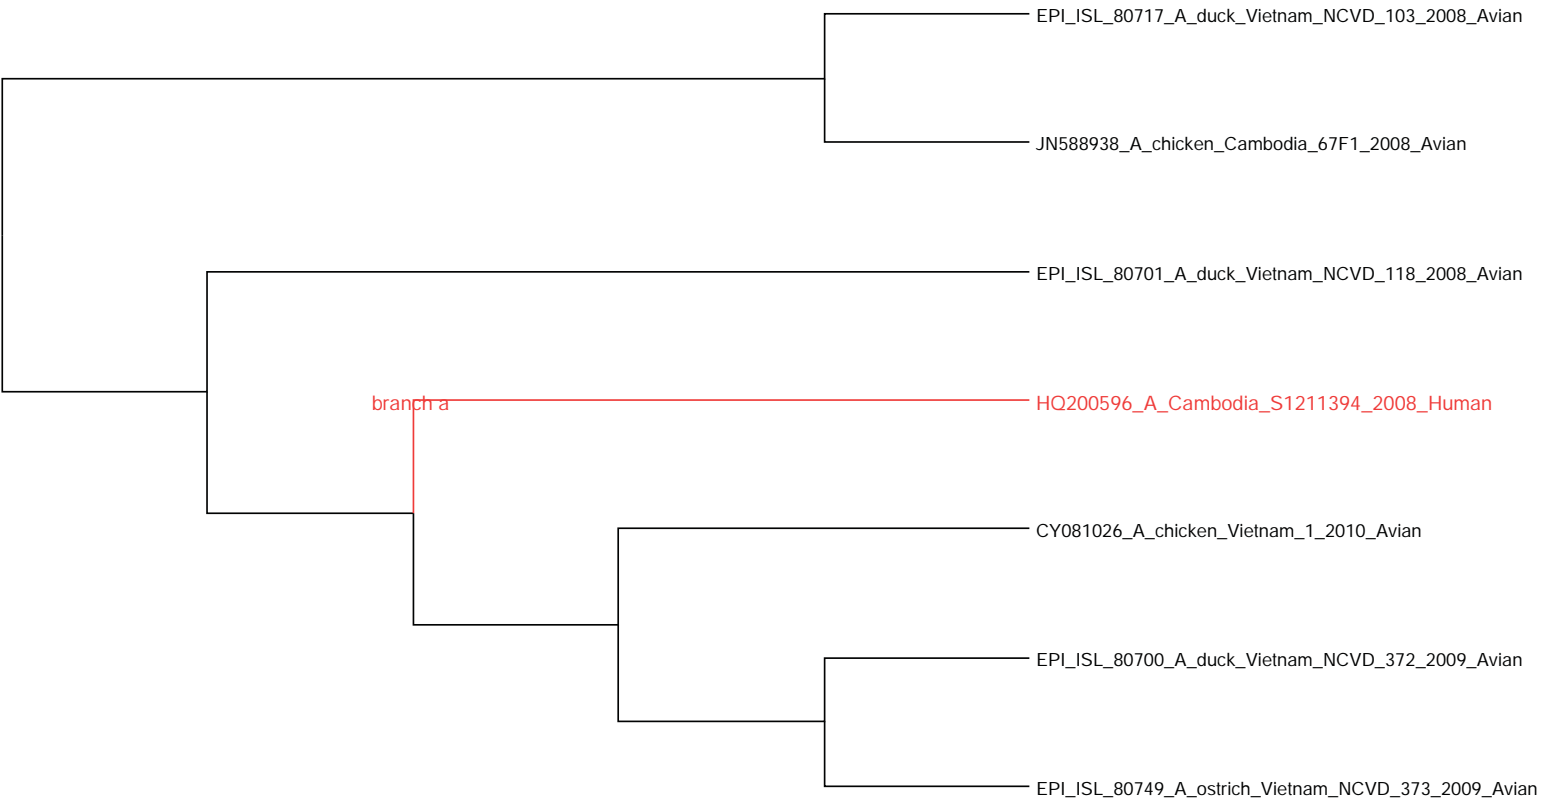

# HA-Group50

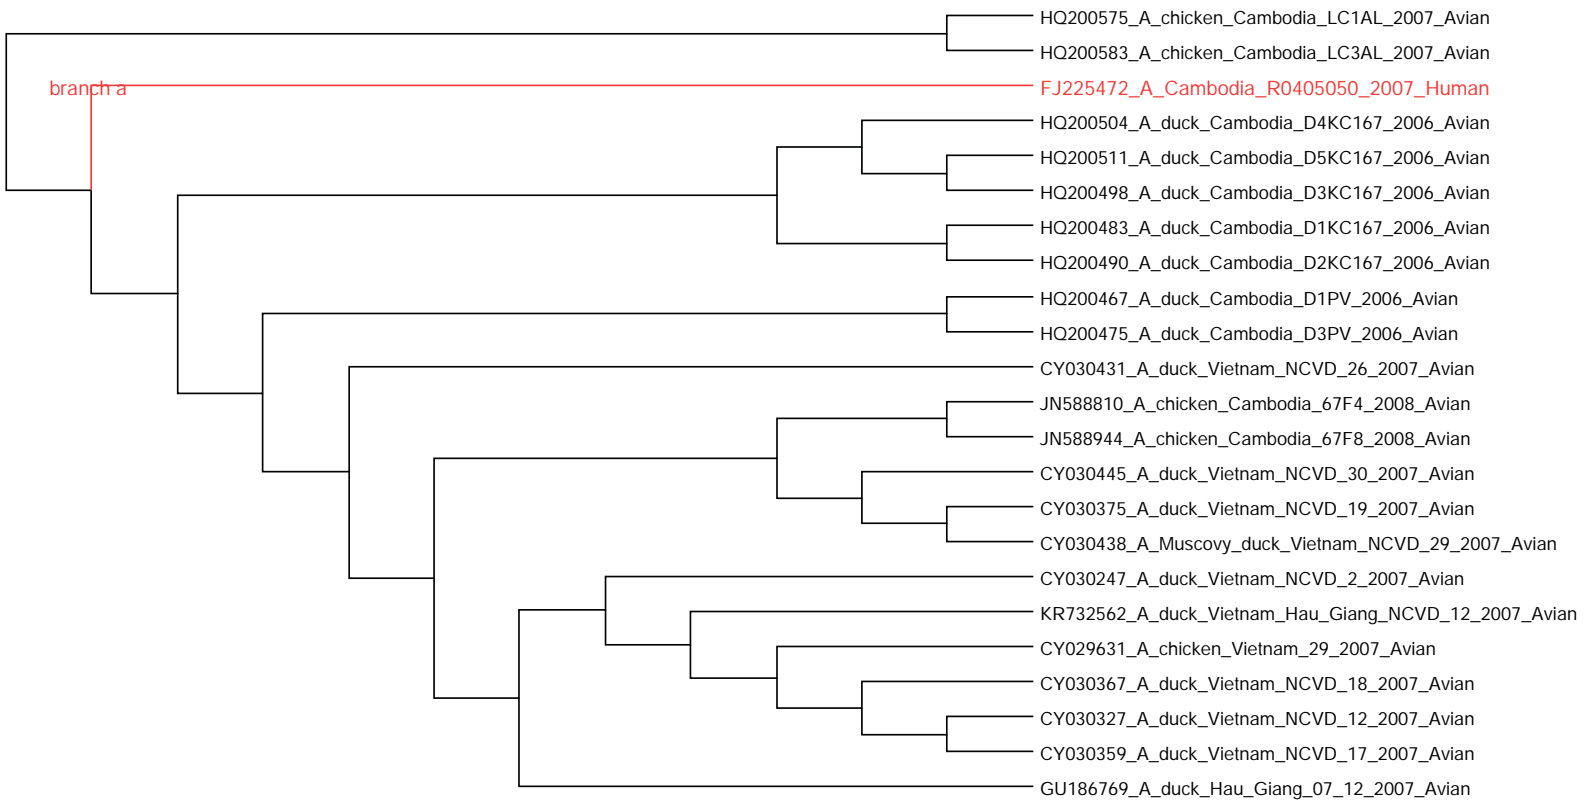

# HA-Group 51

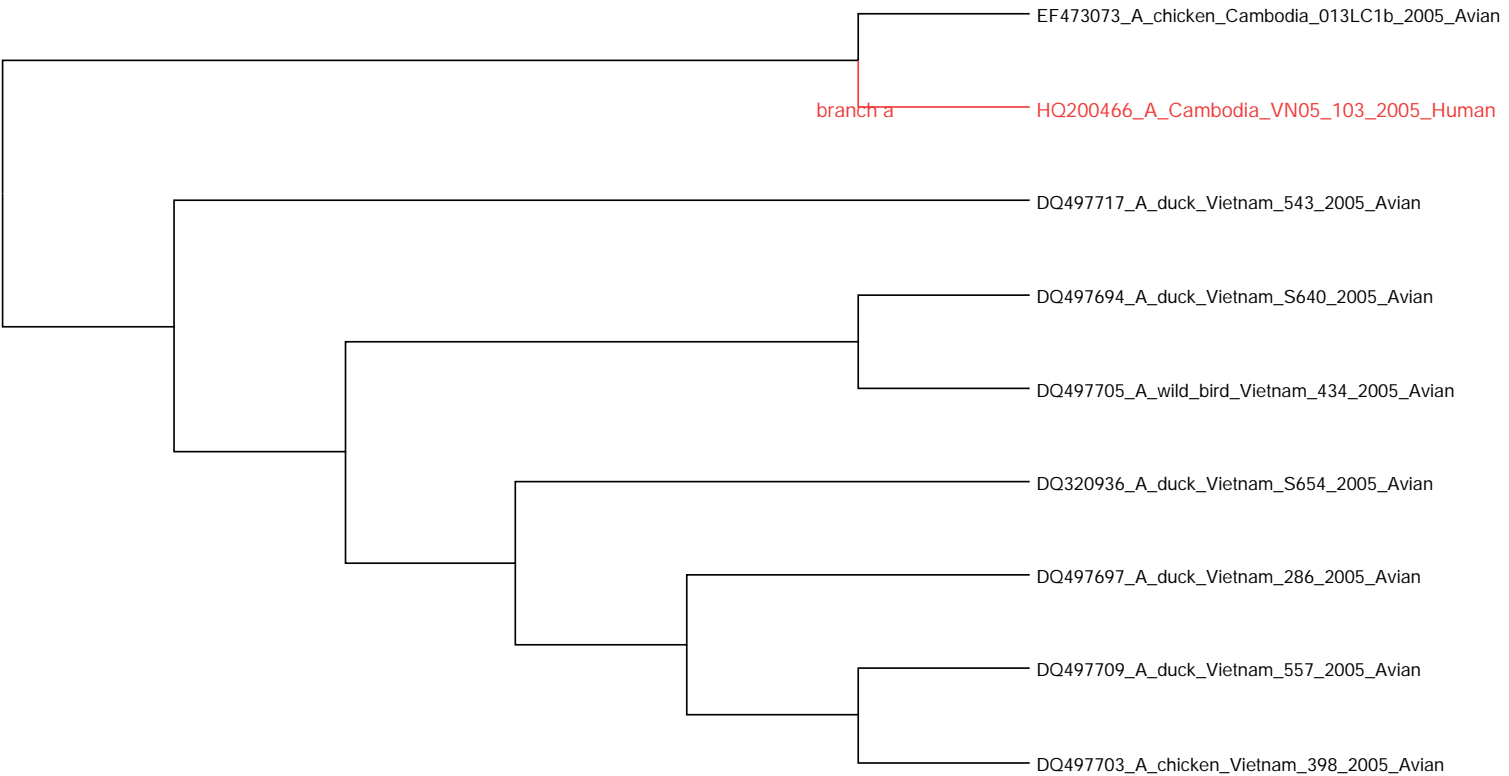

# HA-Group52

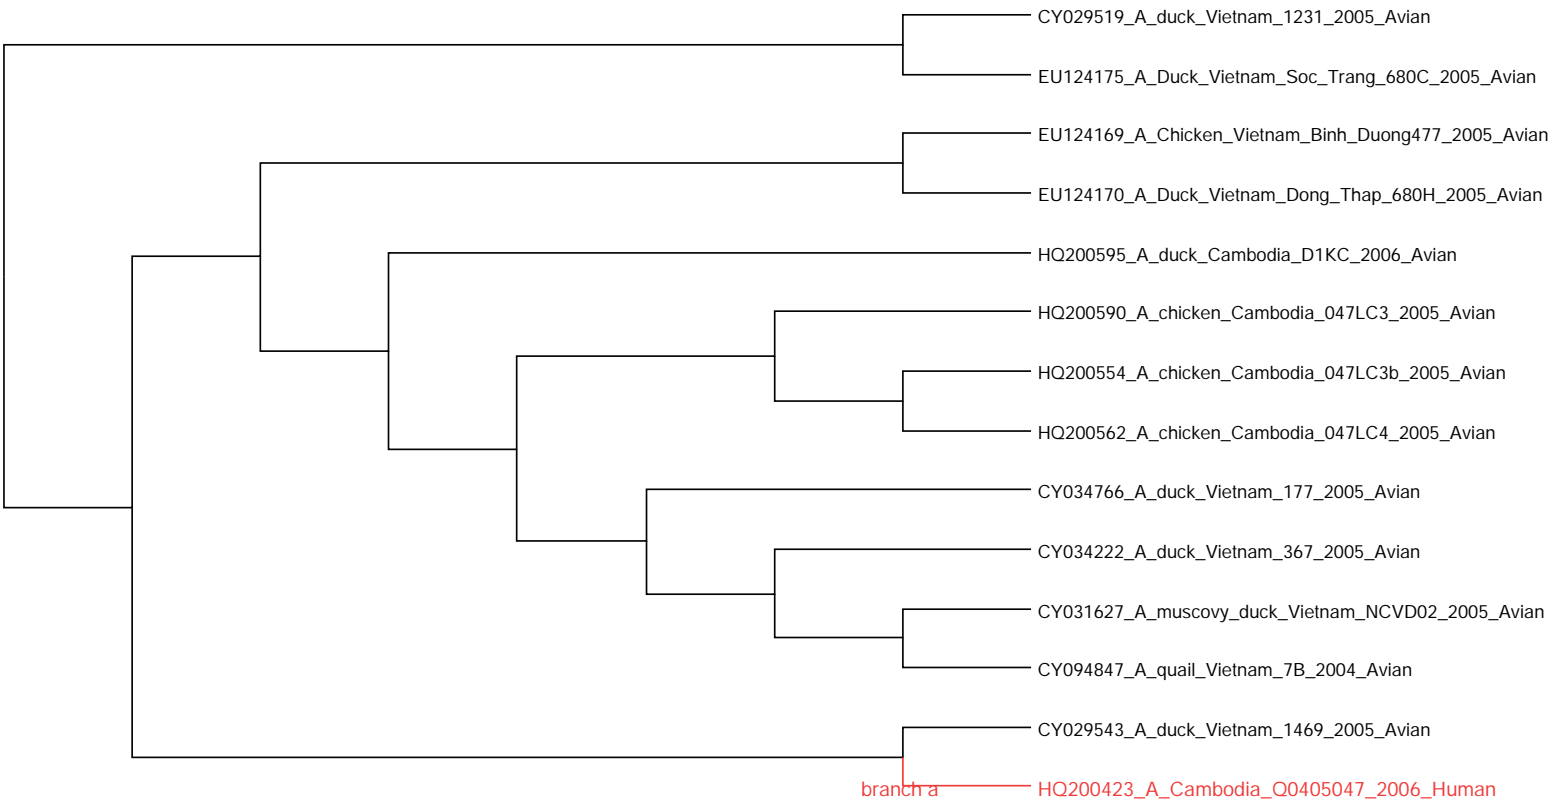

# HA-Group53

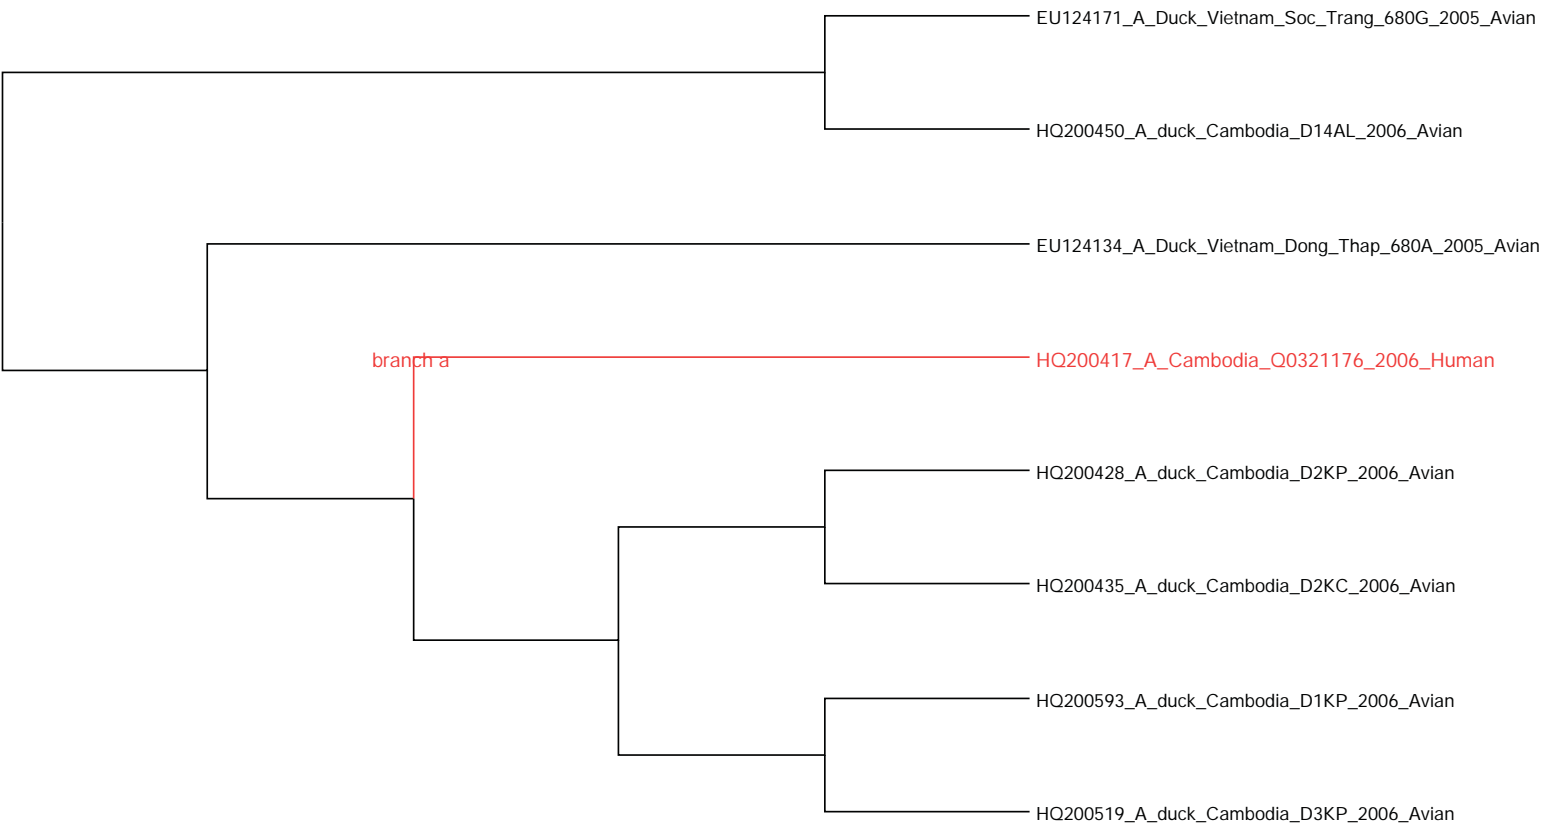

# HA-Group54

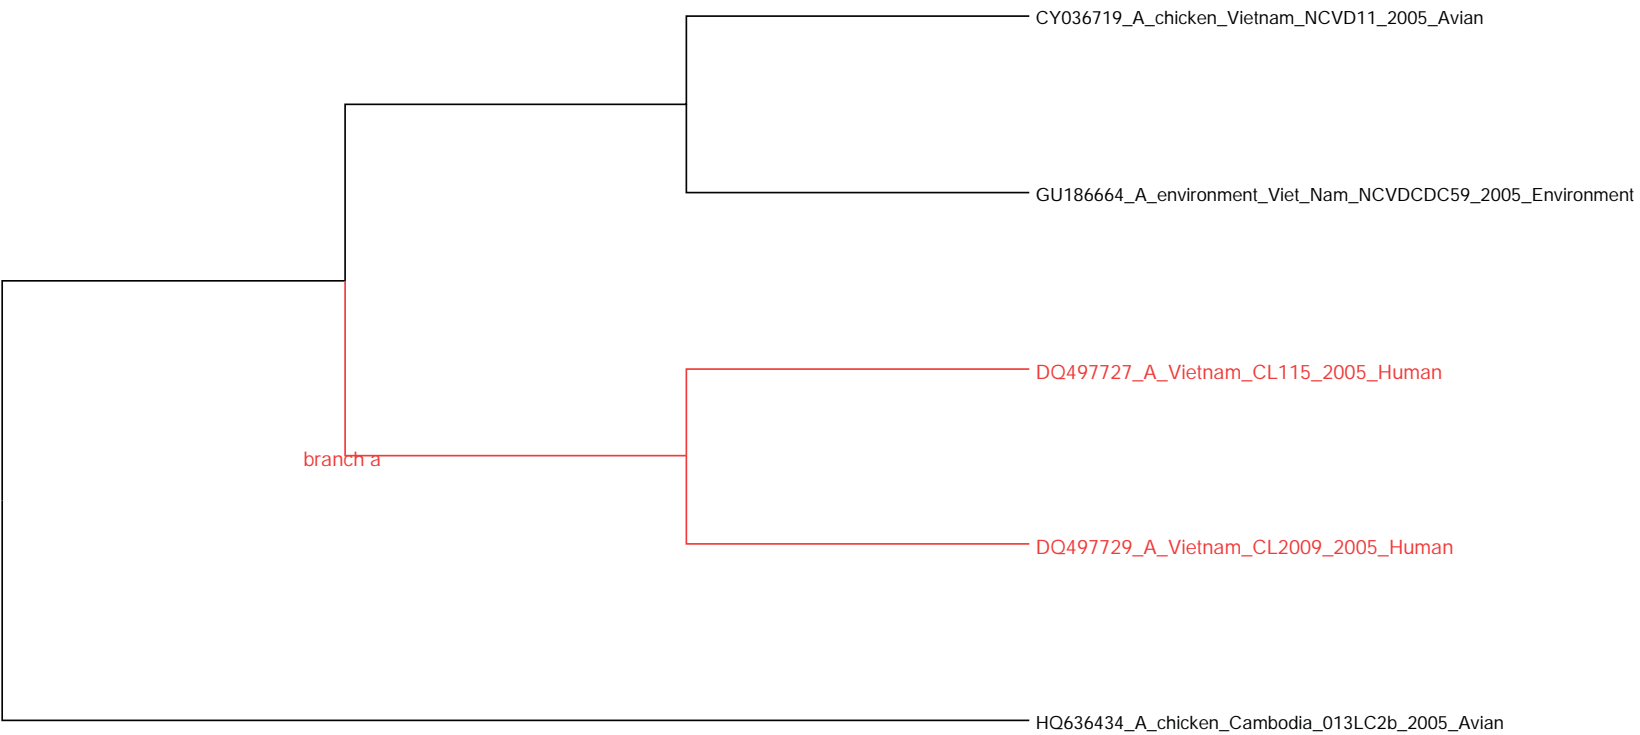

# HA-Group55

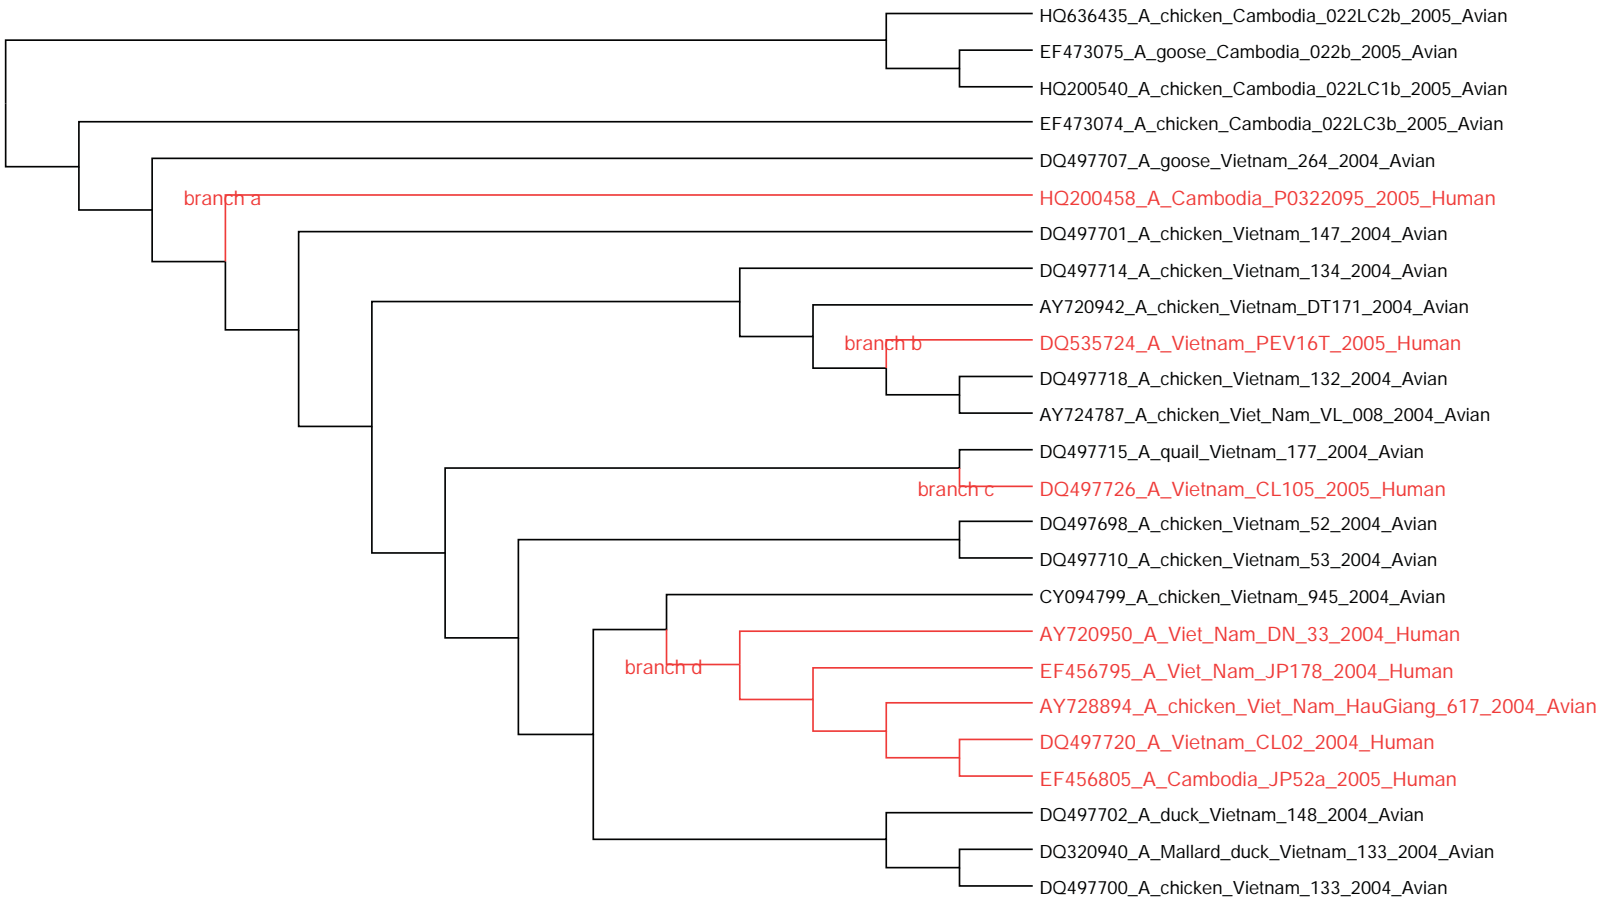

# HA-Group56

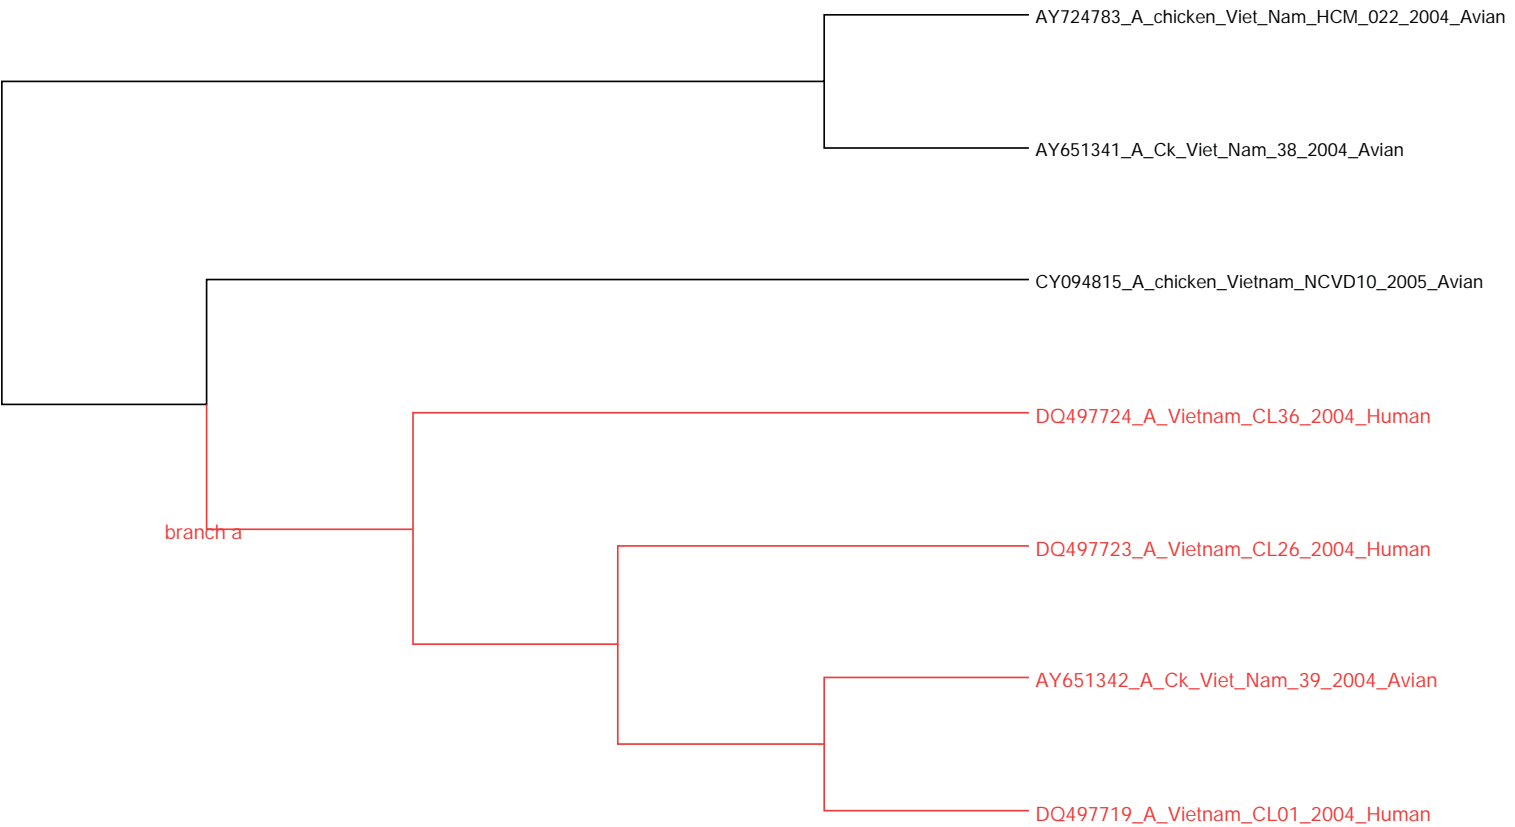



# HA-Group57

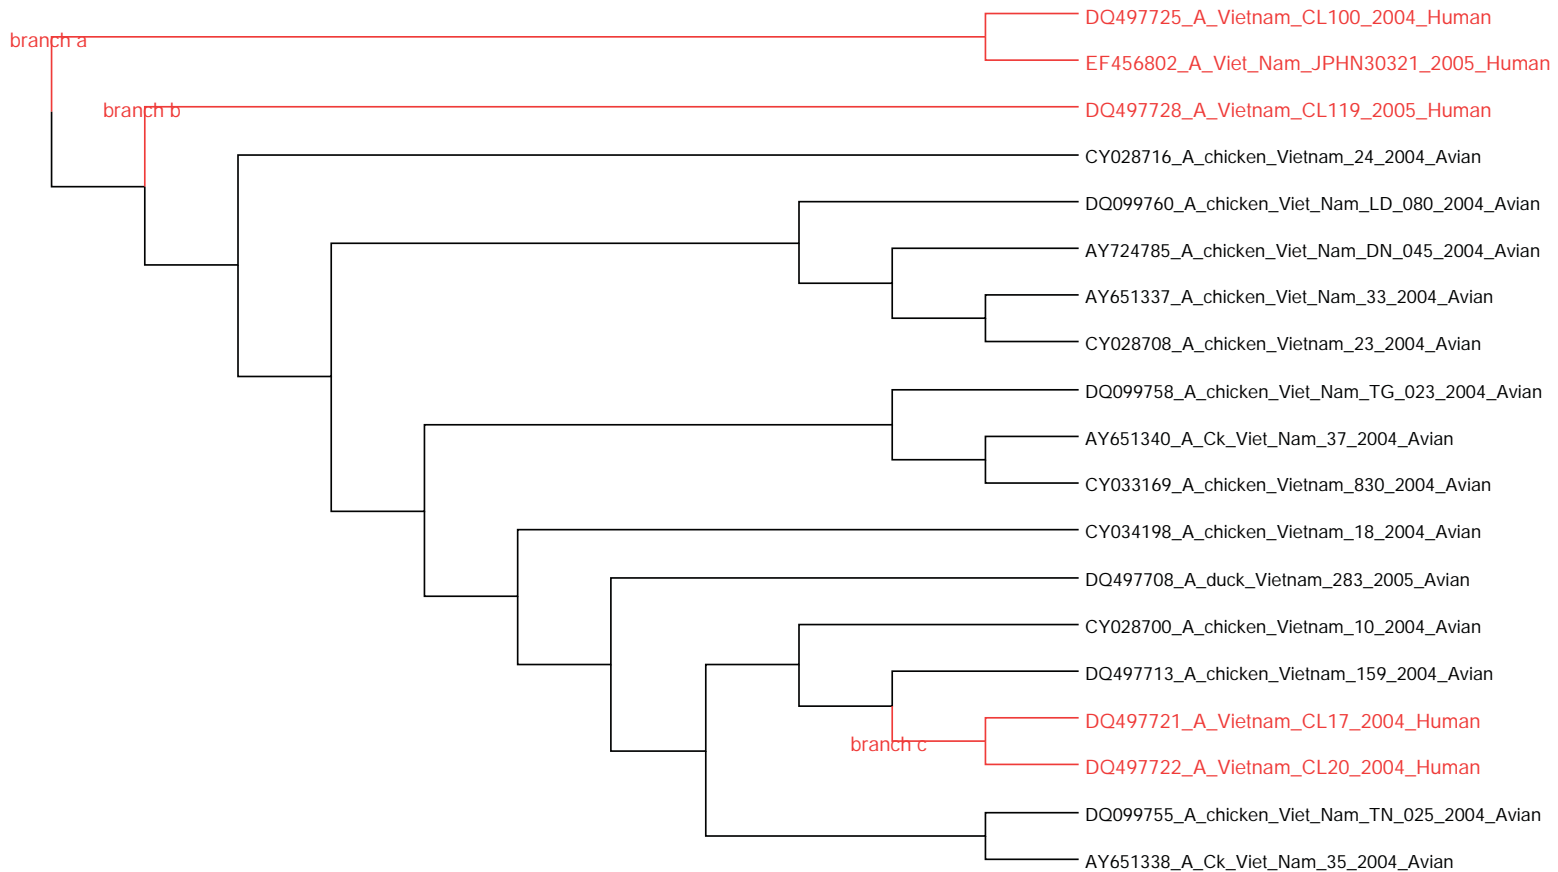

# HA-Group58

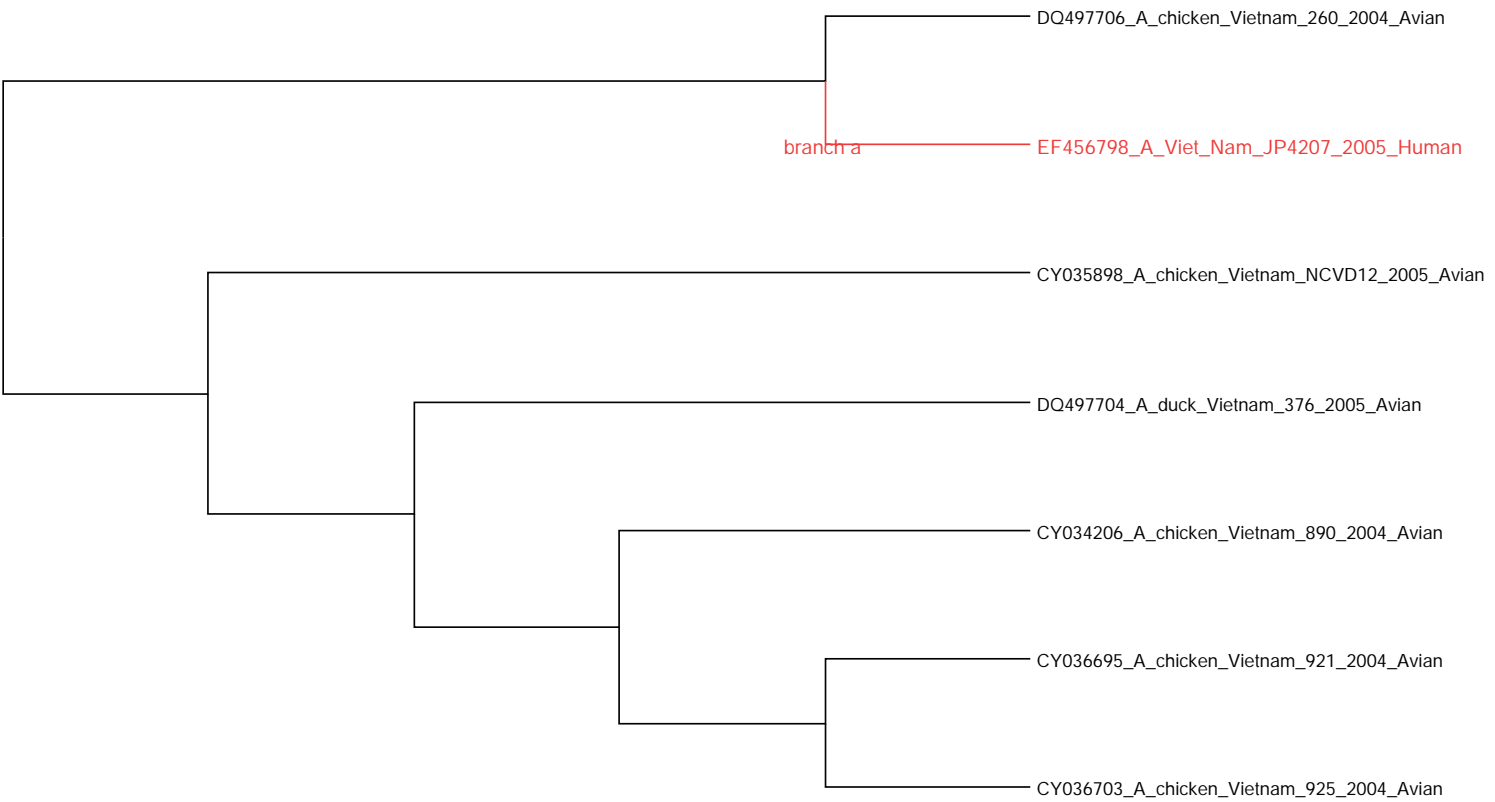

# HA-Group59

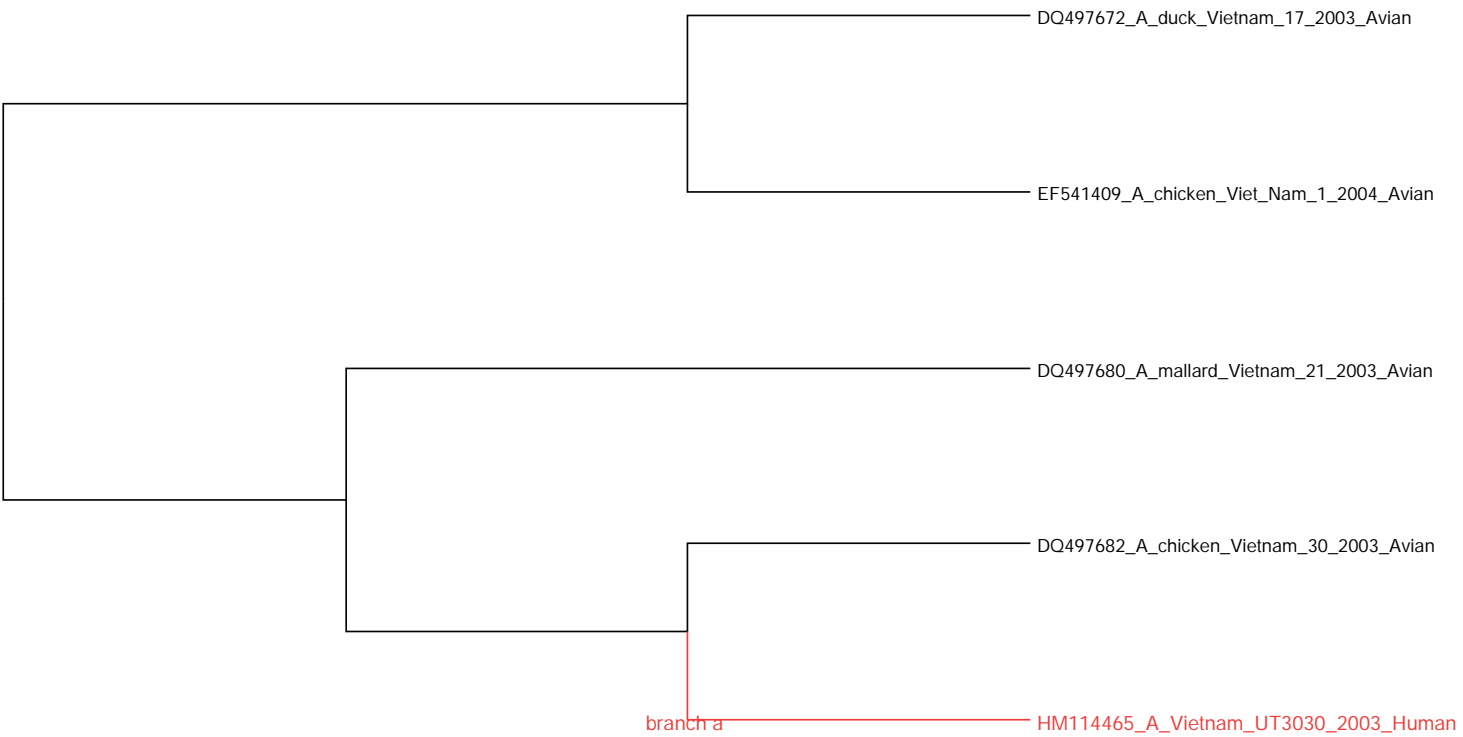

# HA-Group60

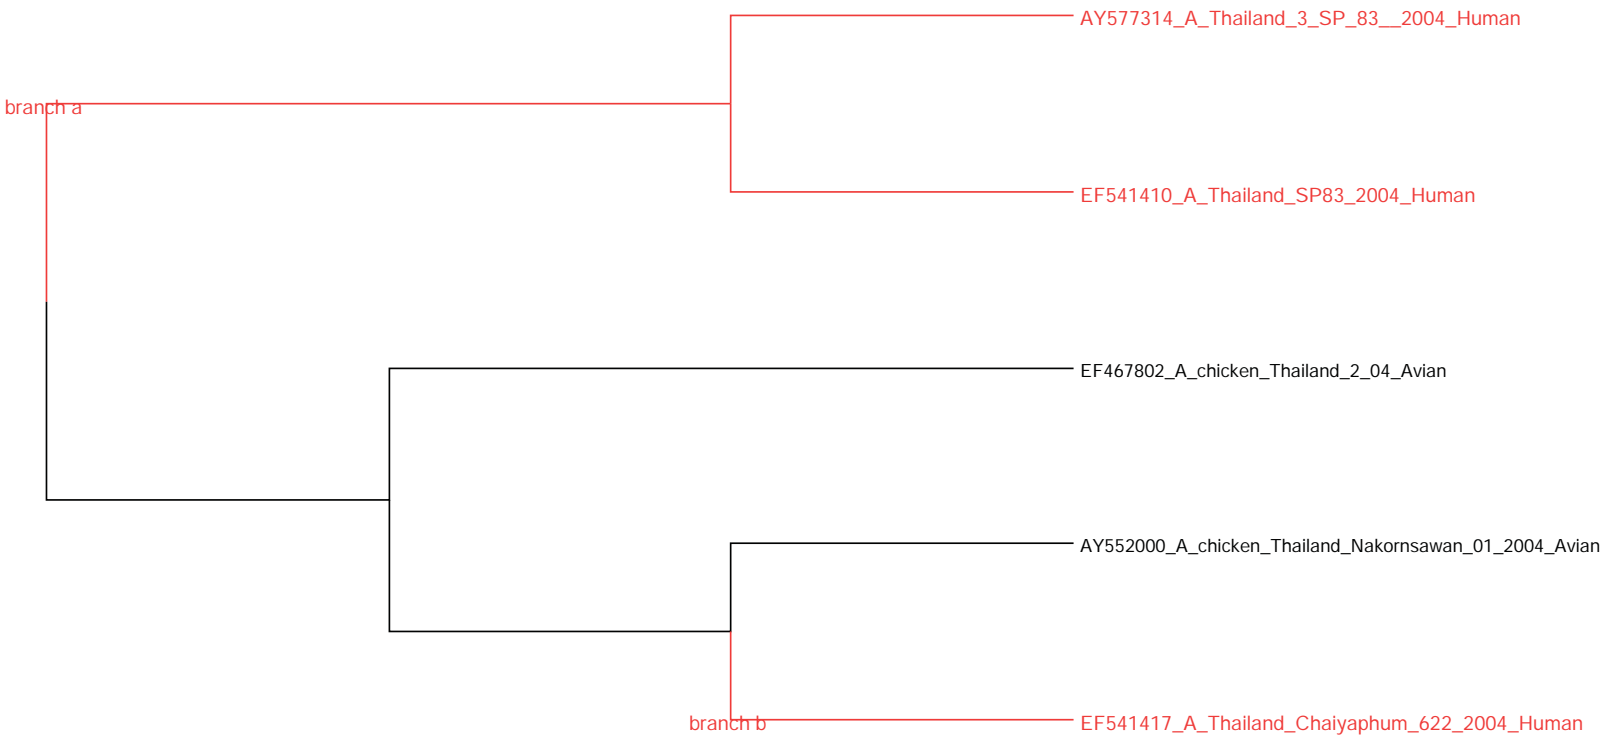

# HA-Group61

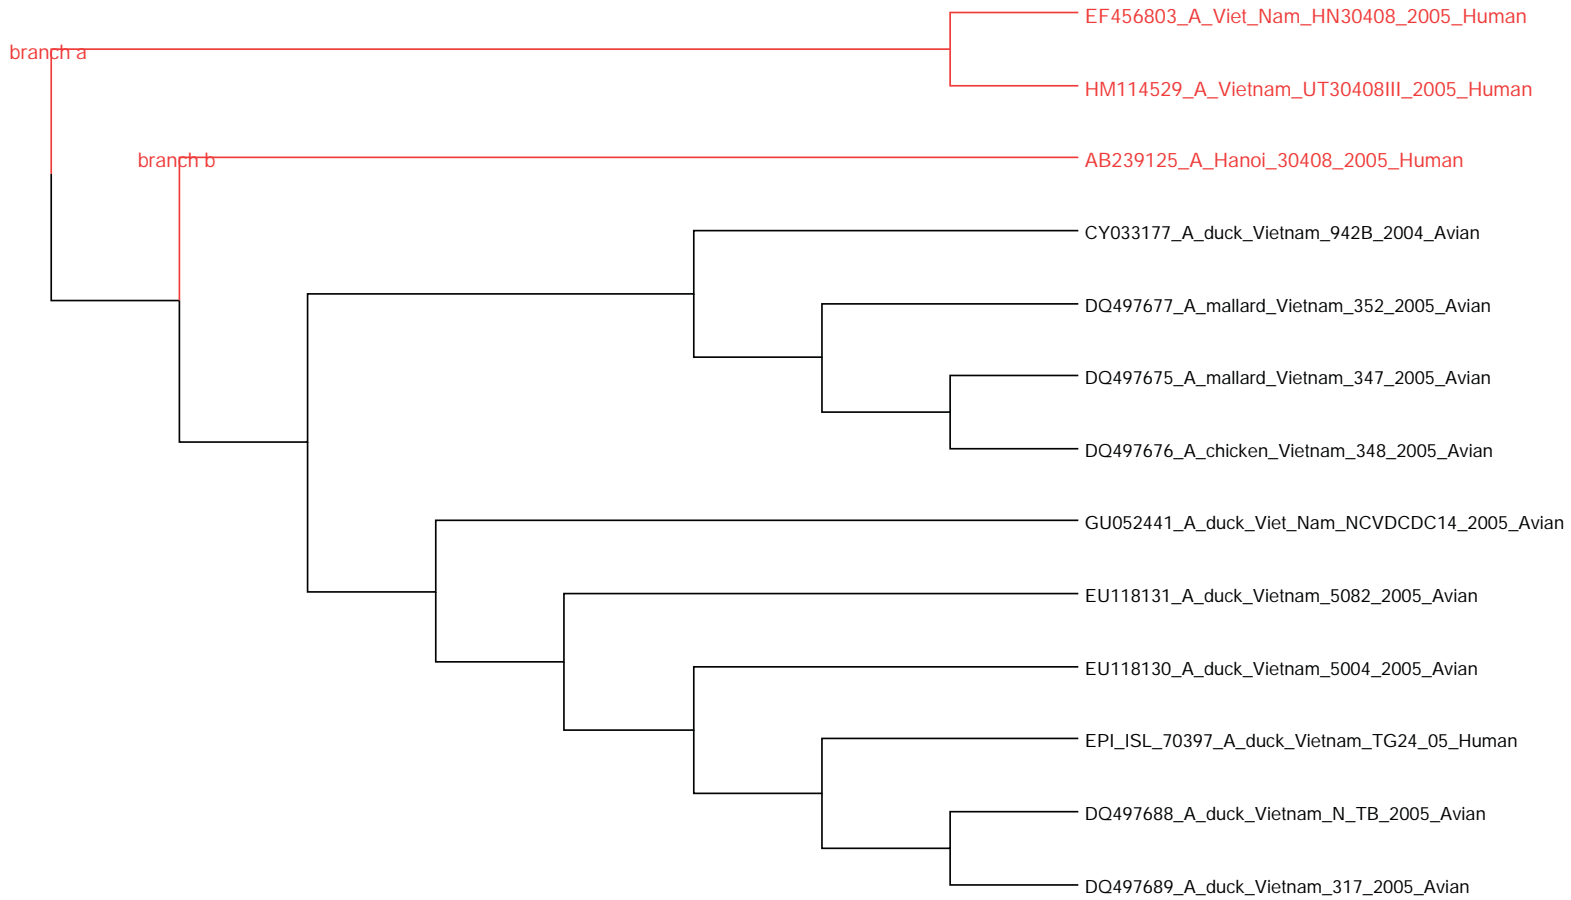

# HA-Group62

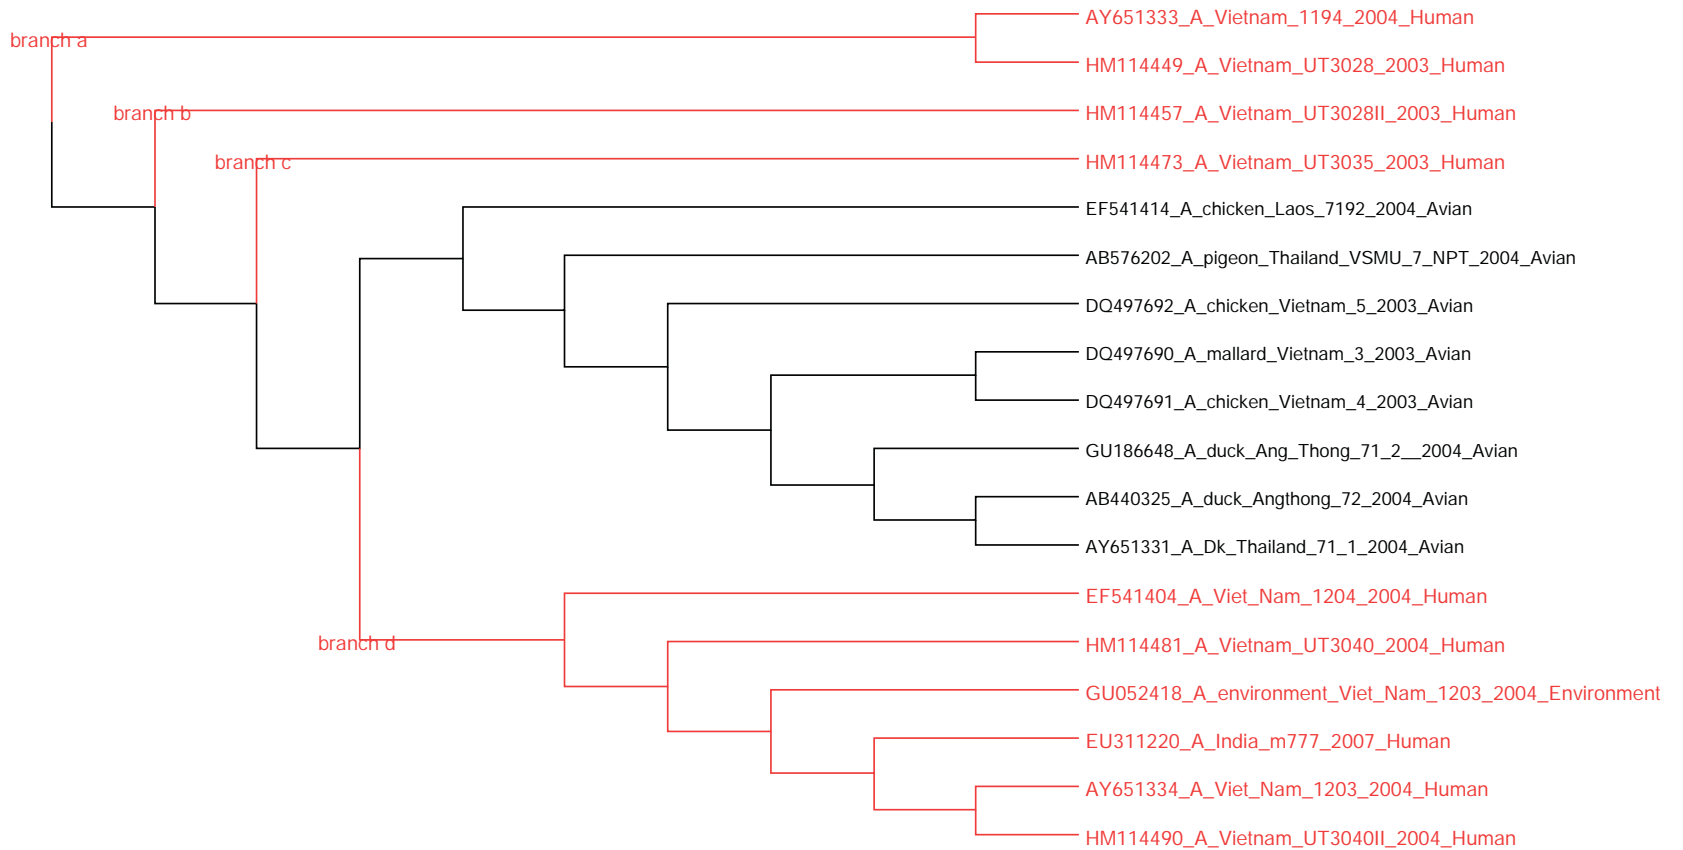

# HA-Group63

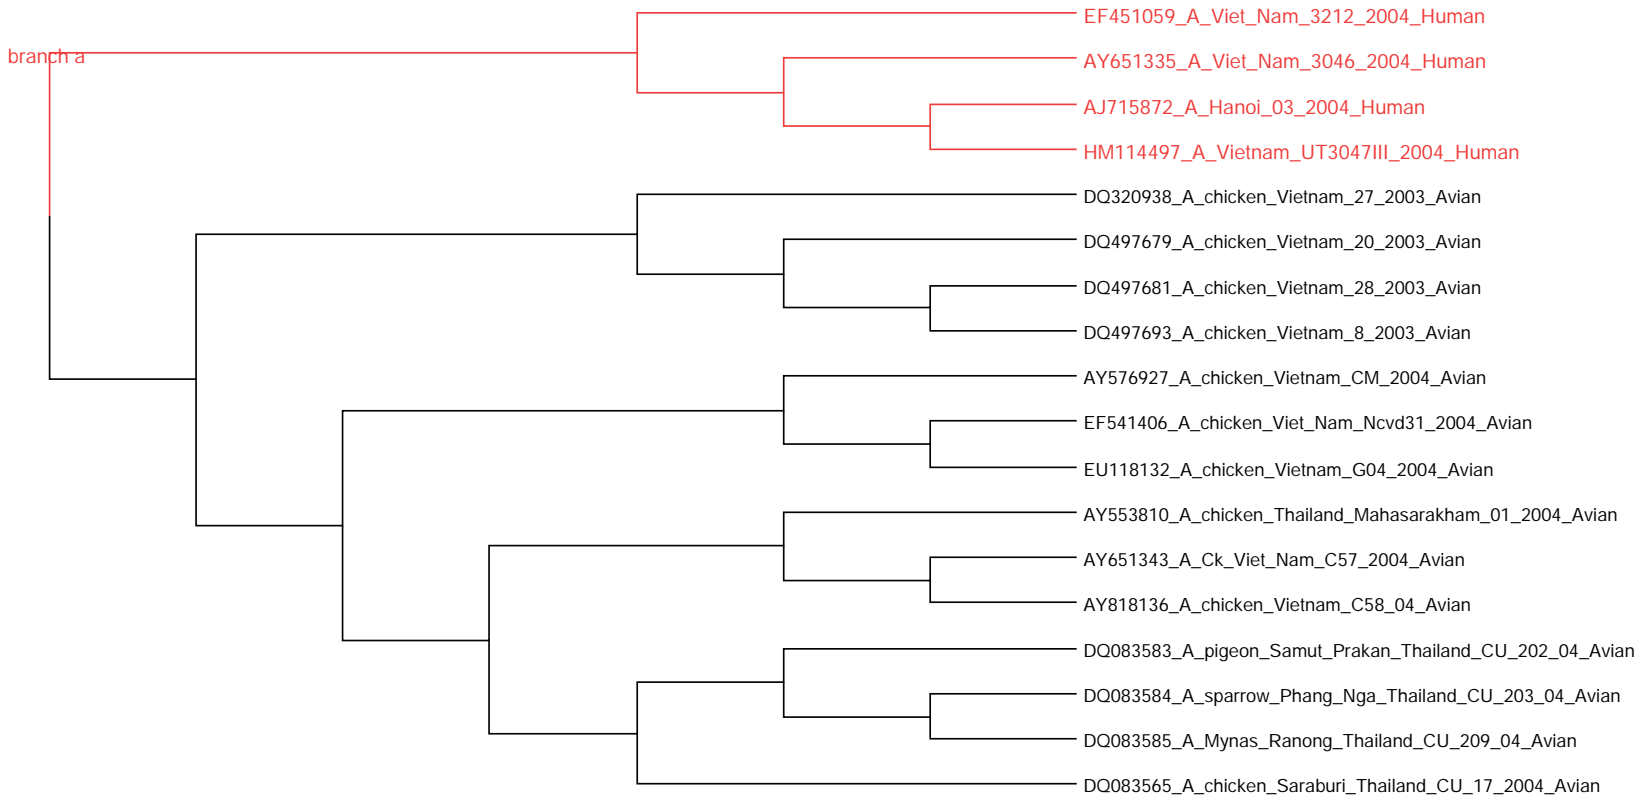

# HA-Group64

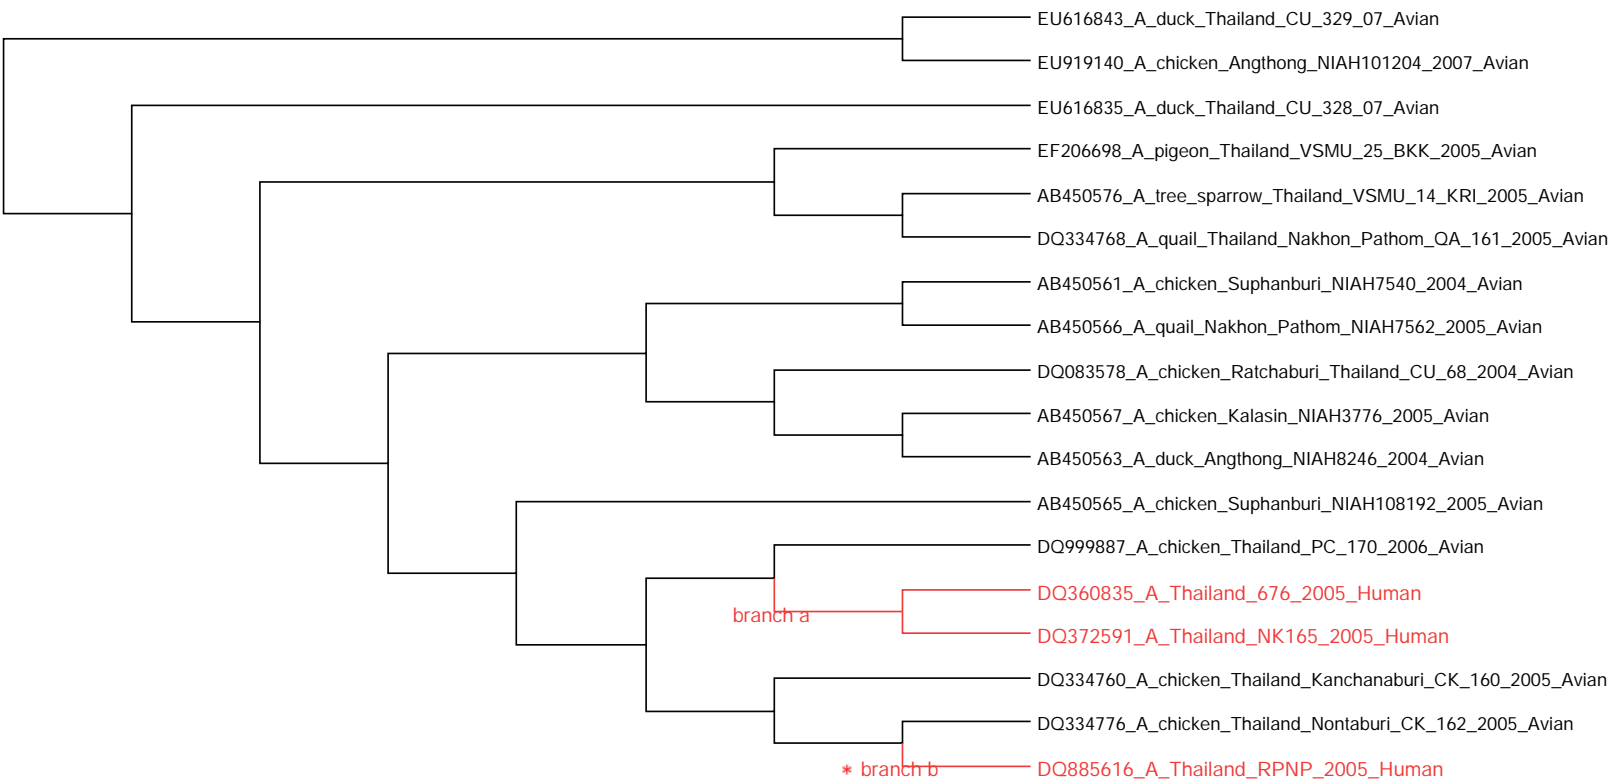



# HA-Group65

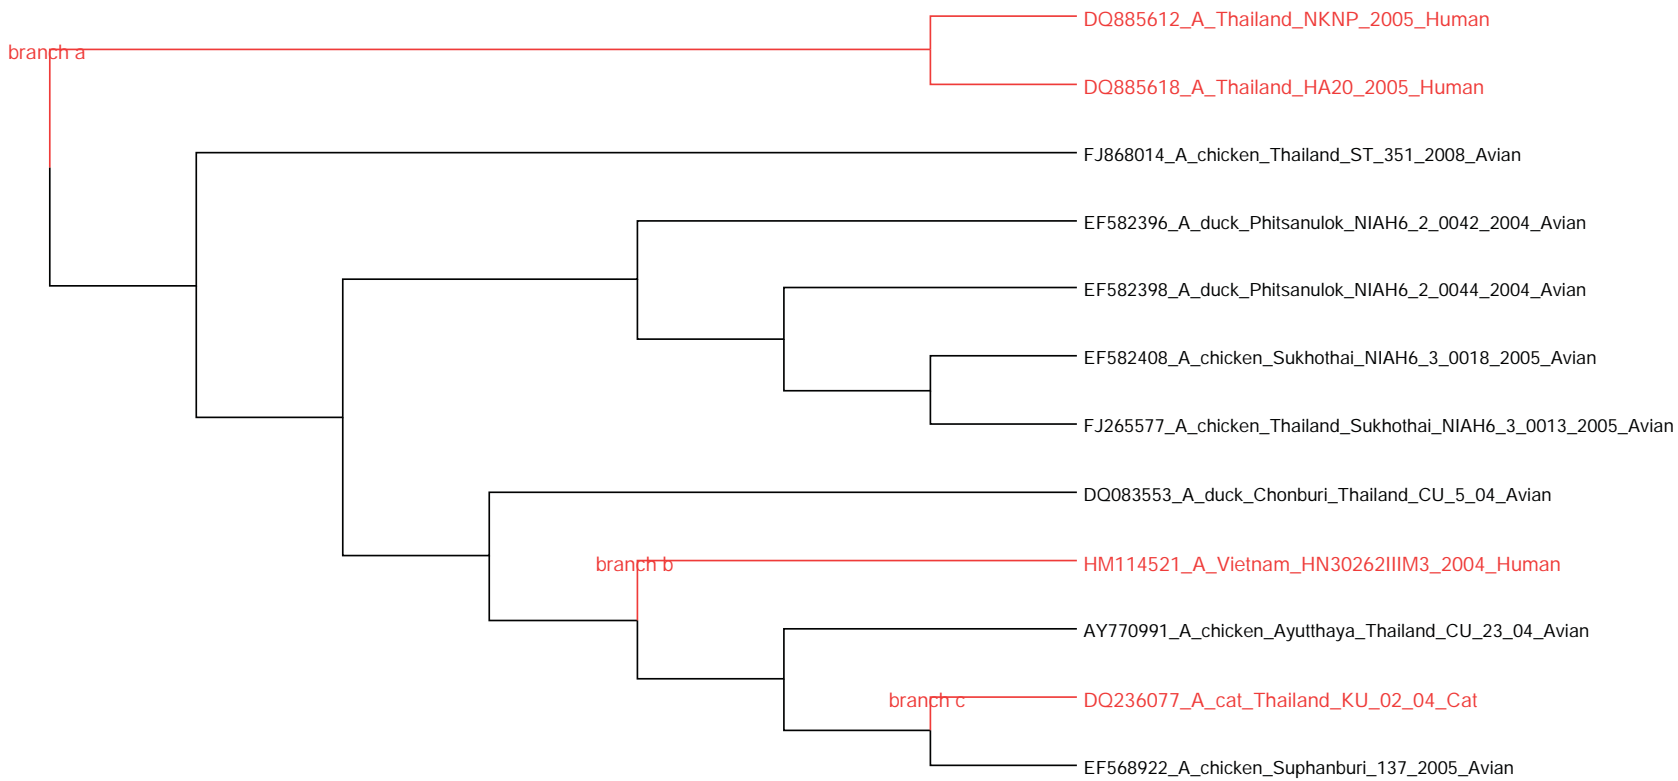

# HA-Group66

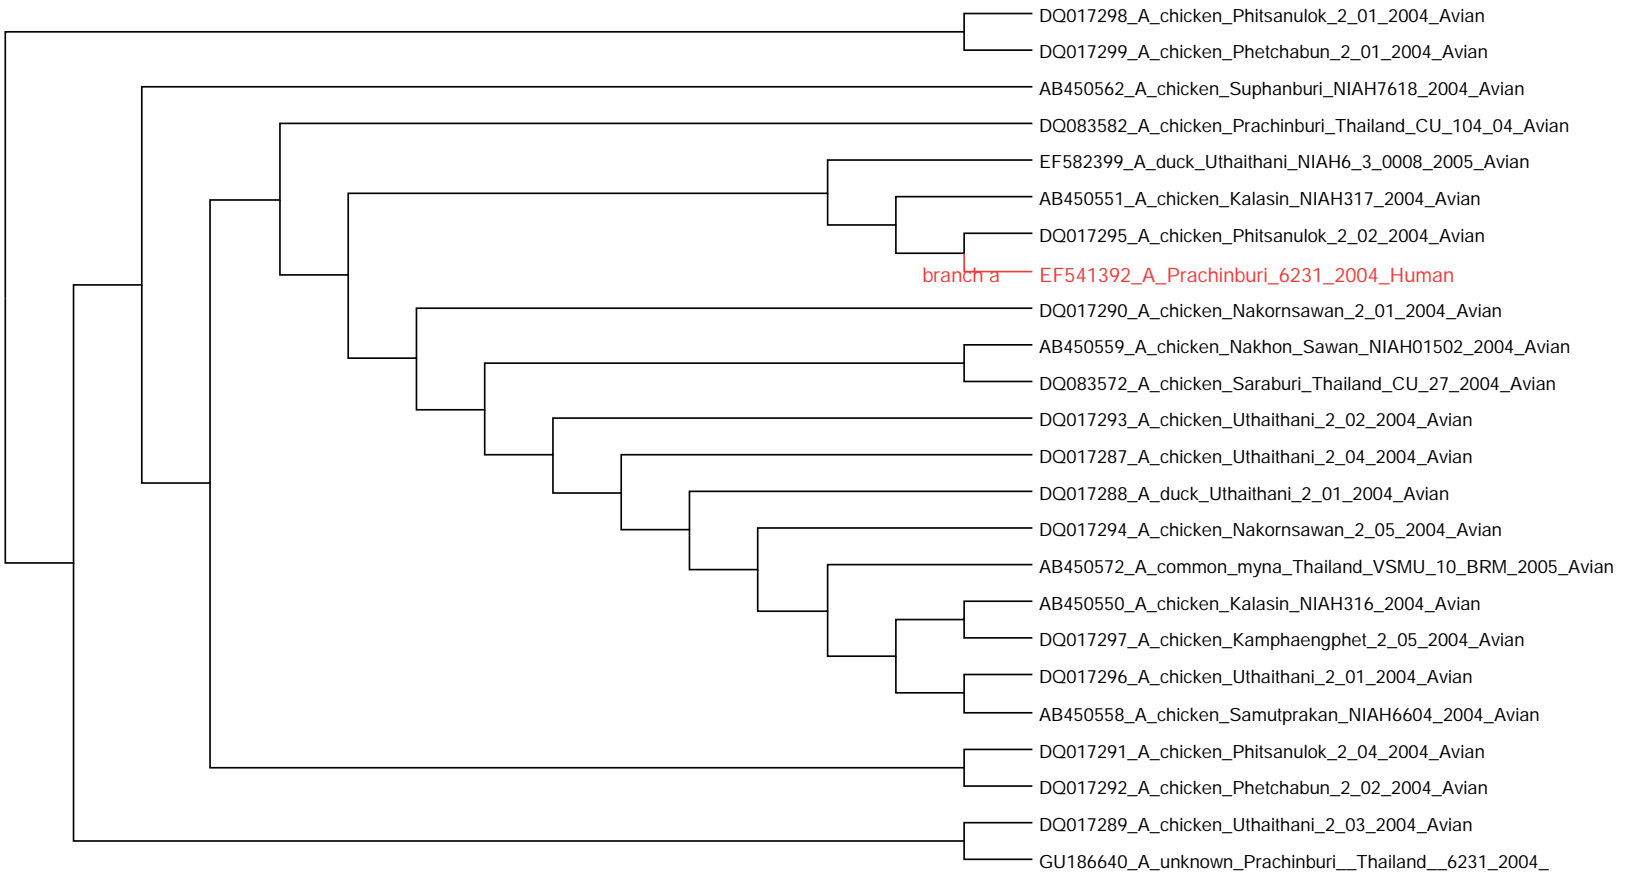

# HA-Group67

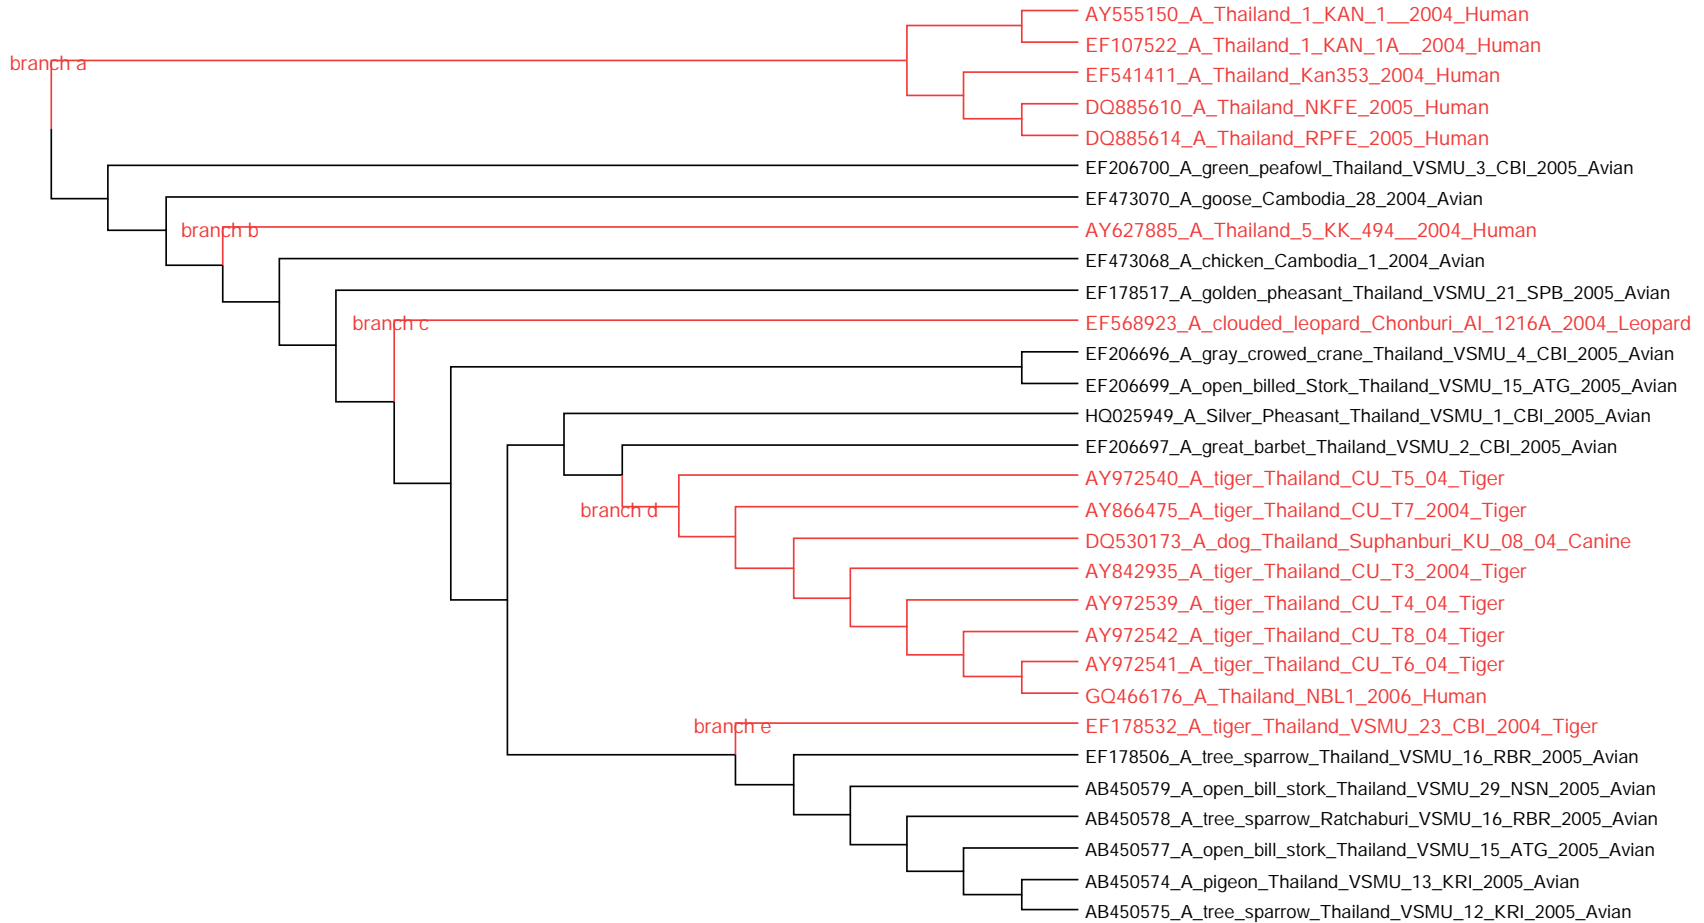

# HA-Group68

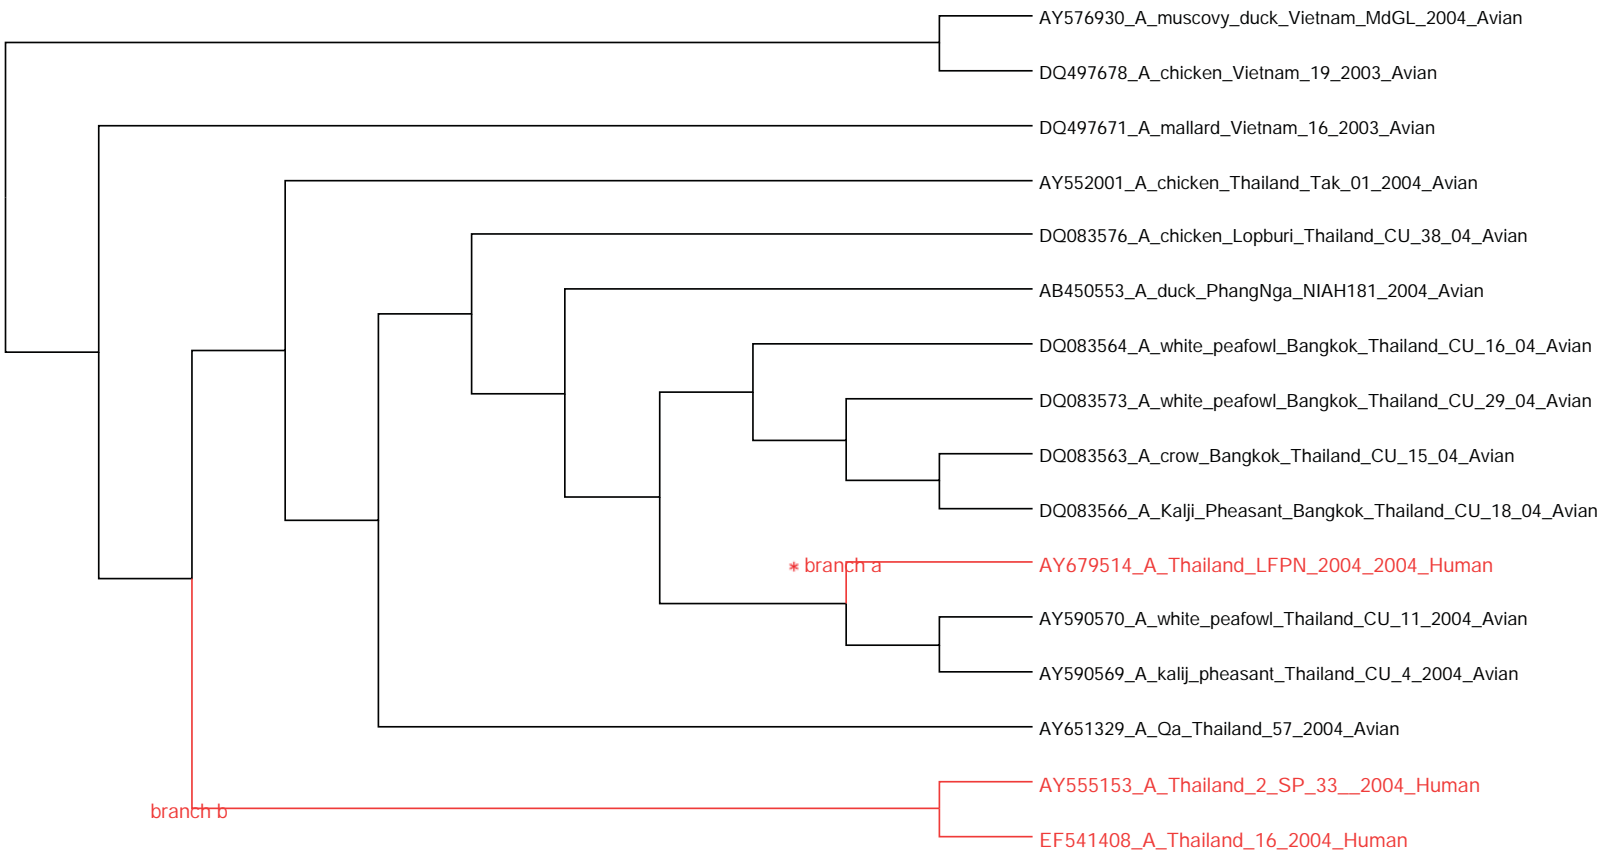

# HA-Group69

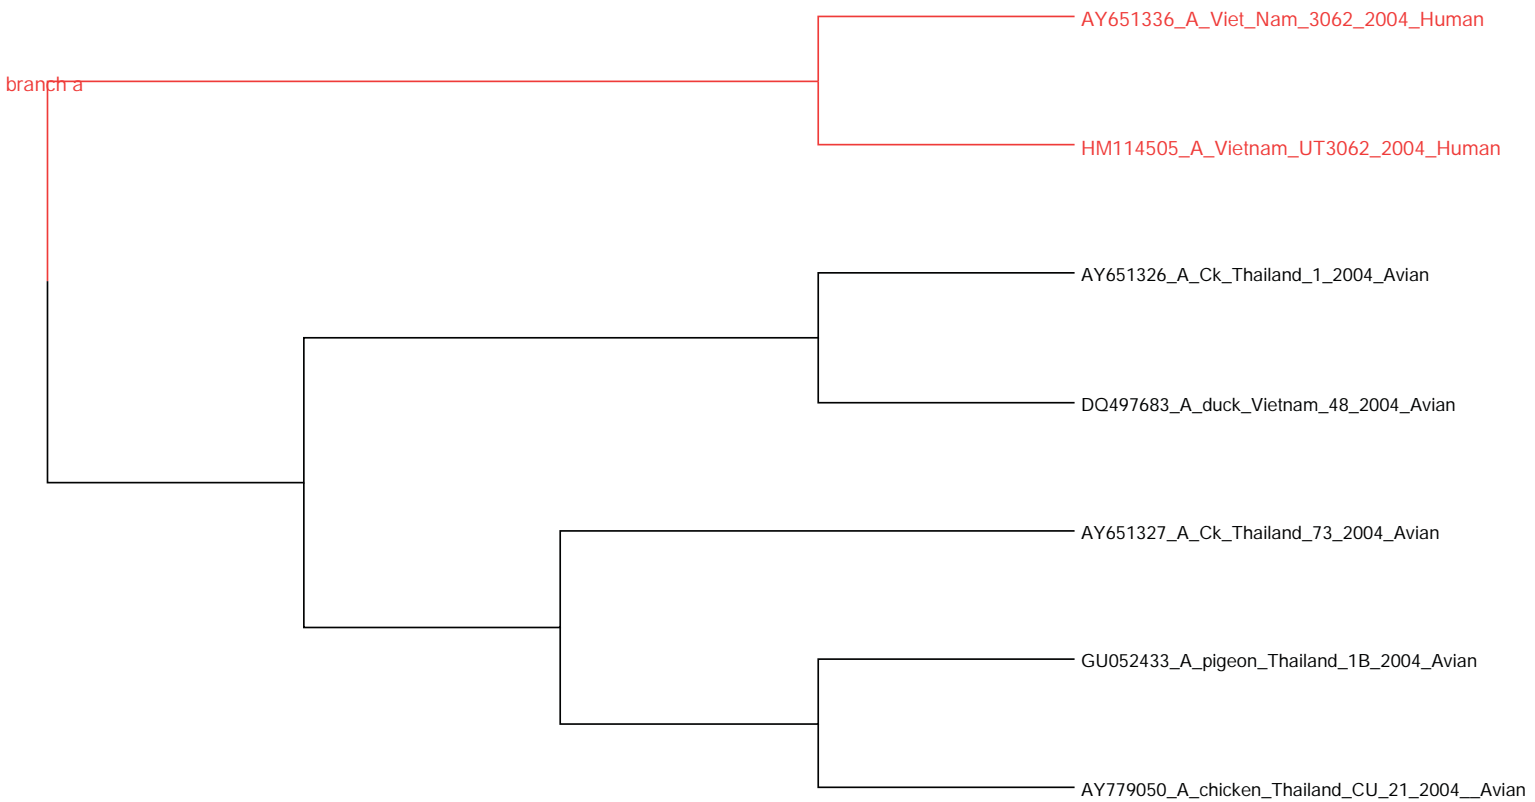

# HA-Group70

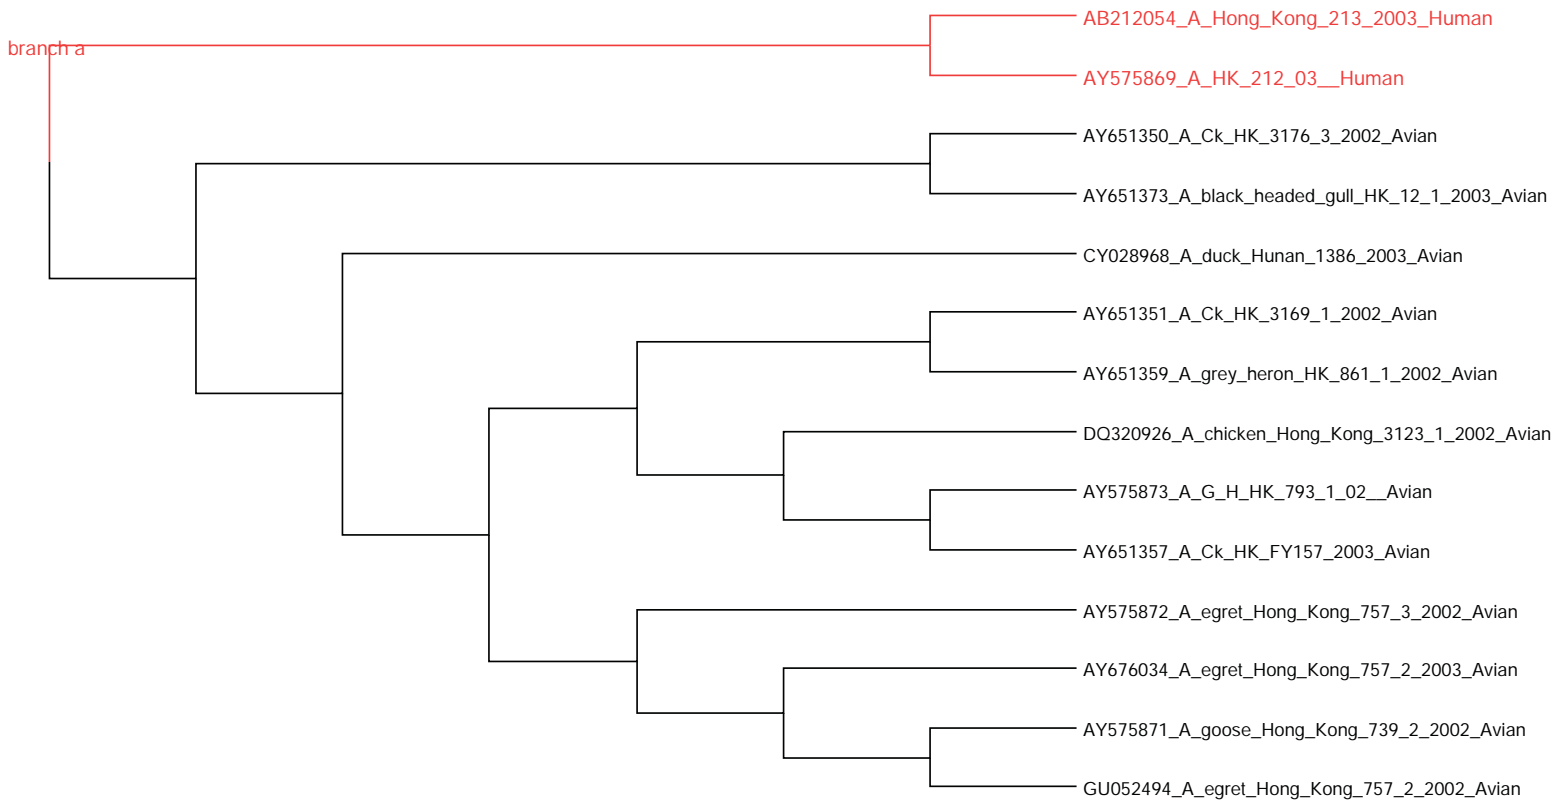

# HA-Group71

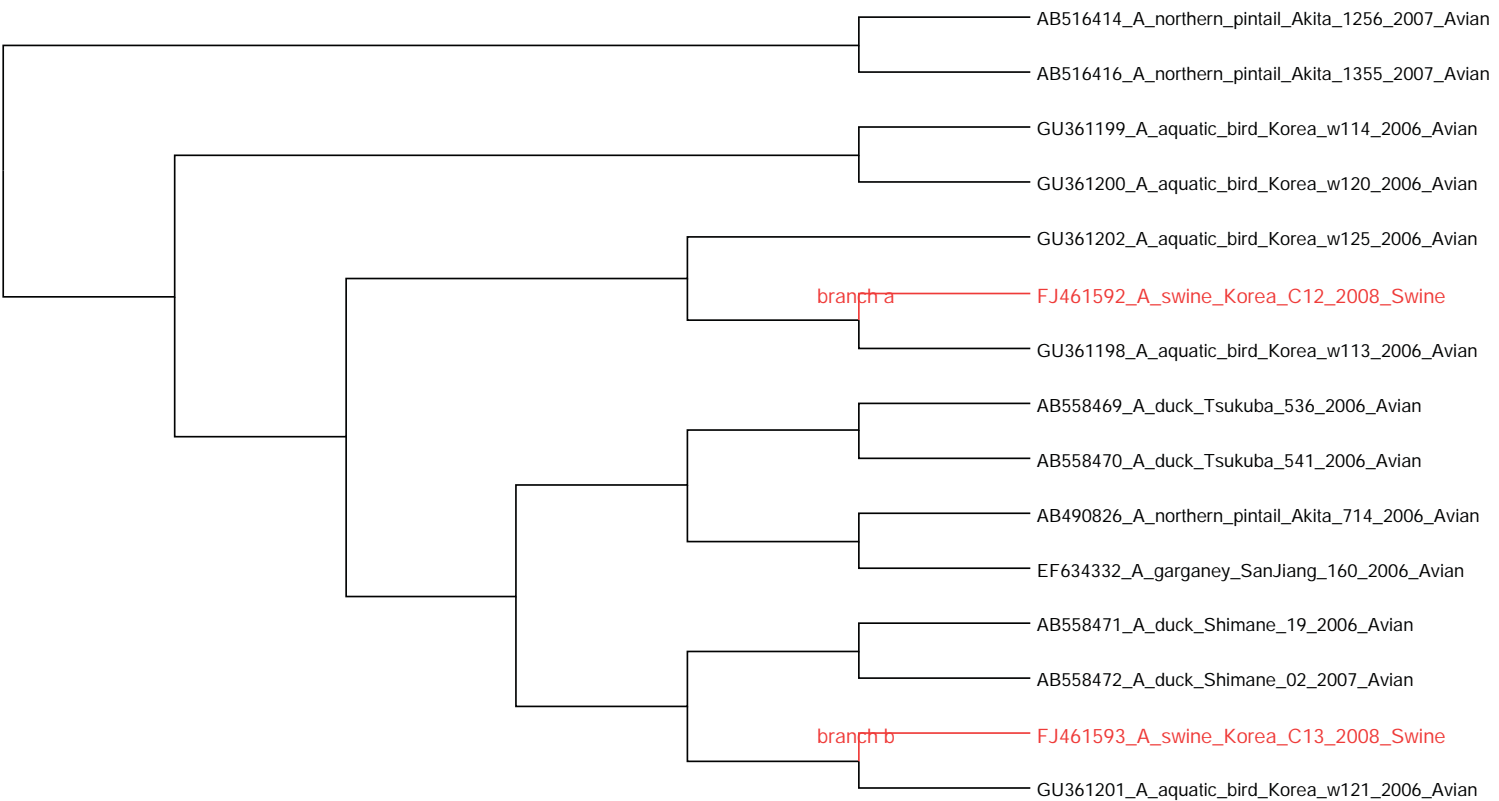

# HA-Group72

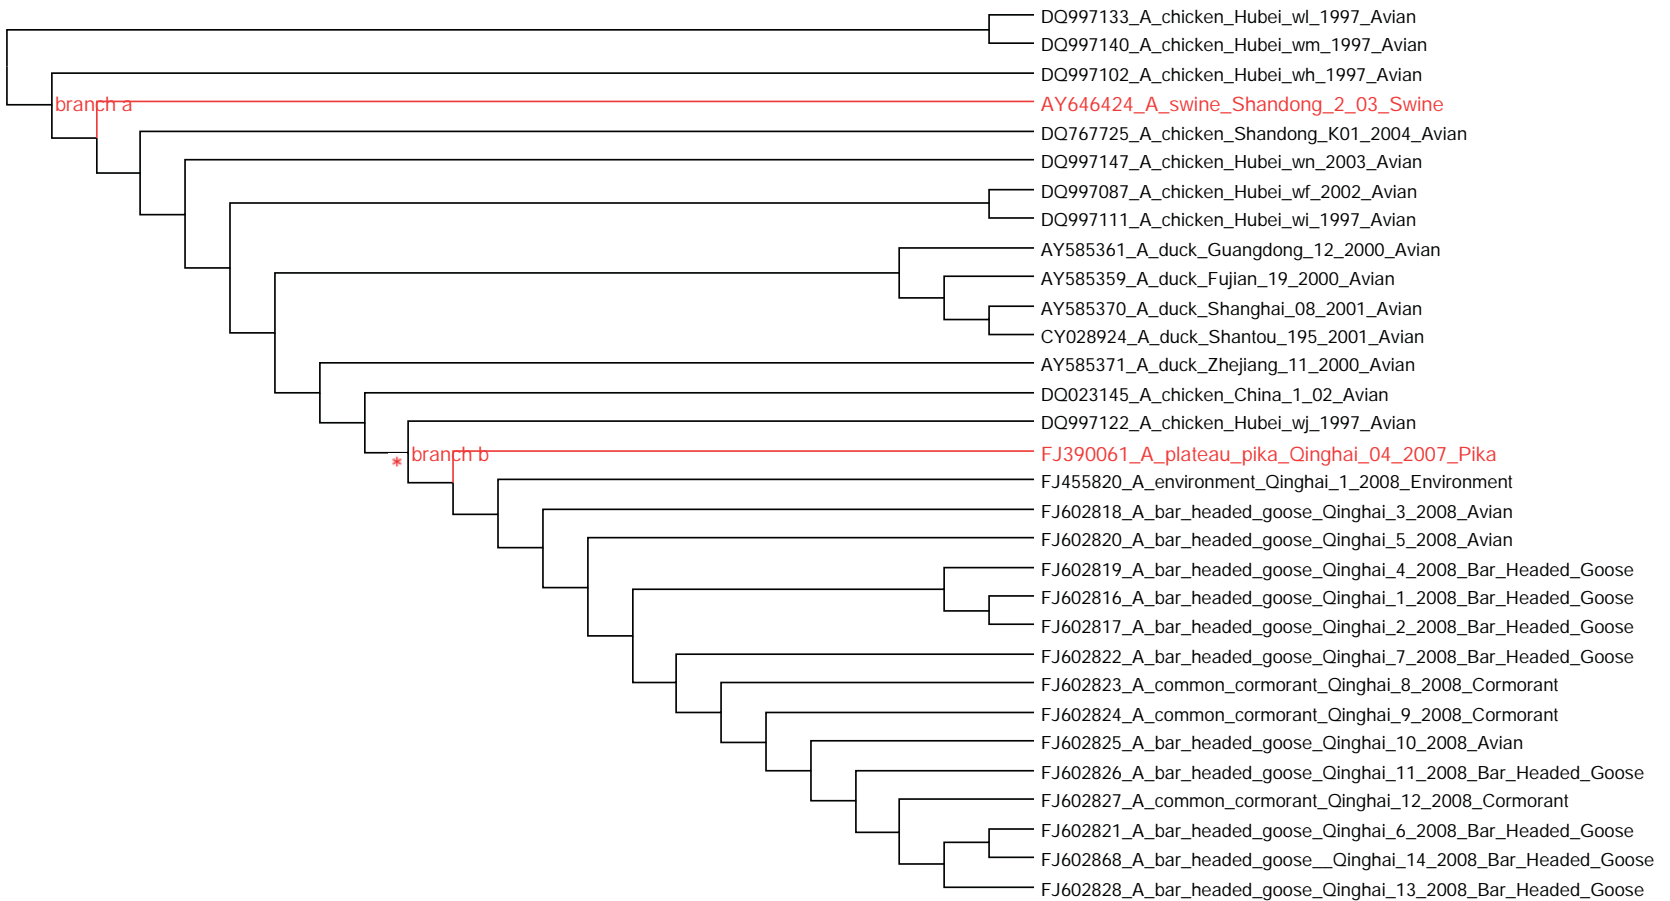



# HA-Group73

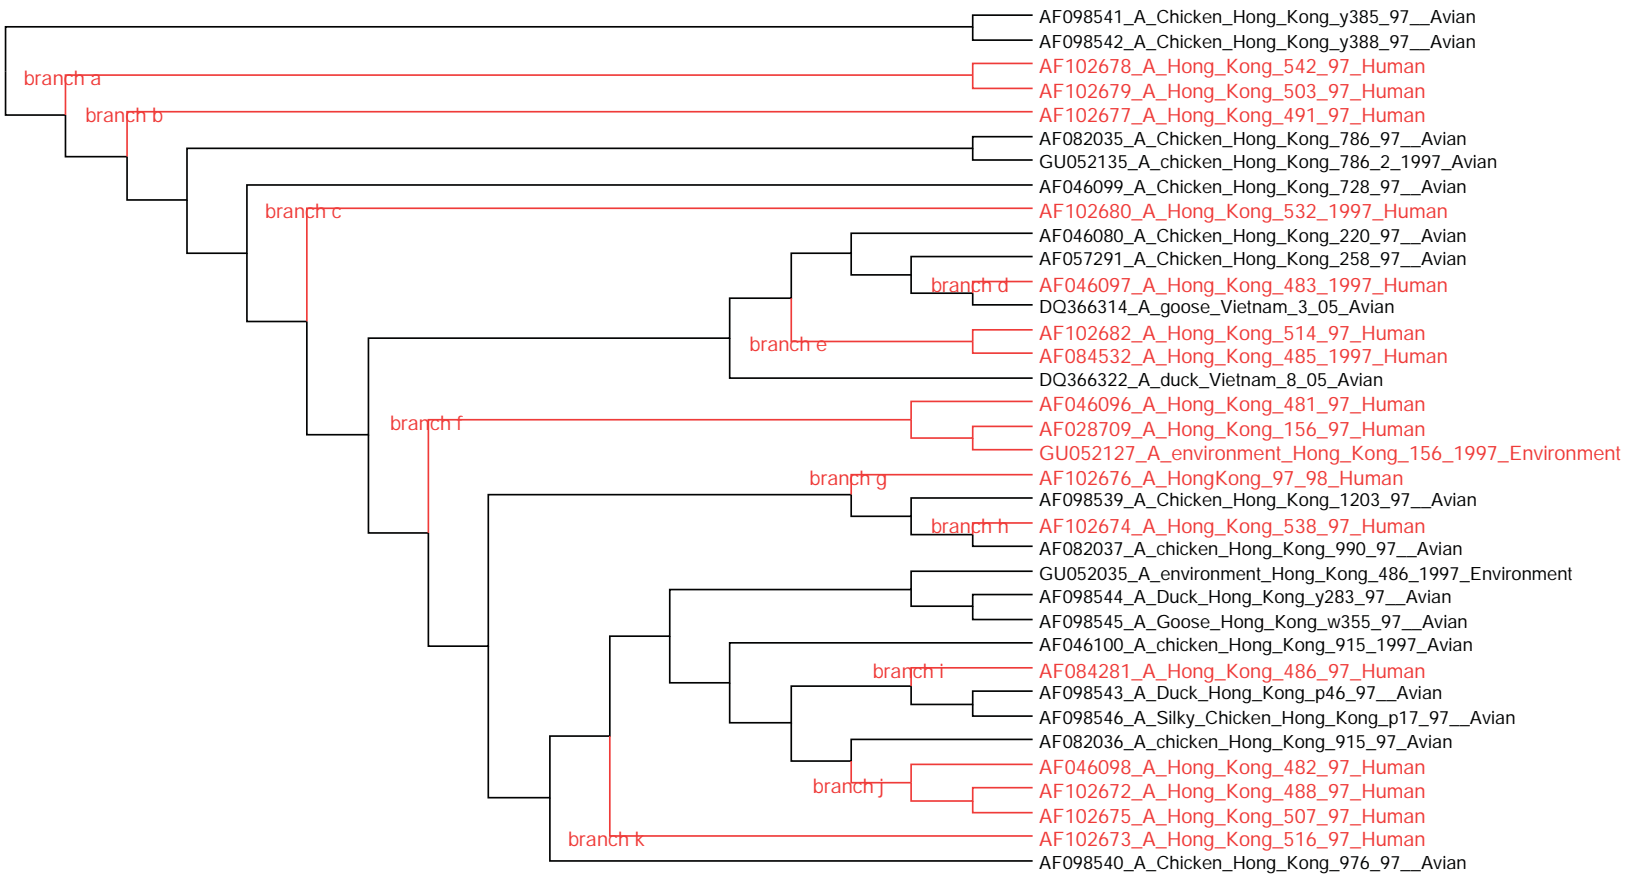

# HA-Group74

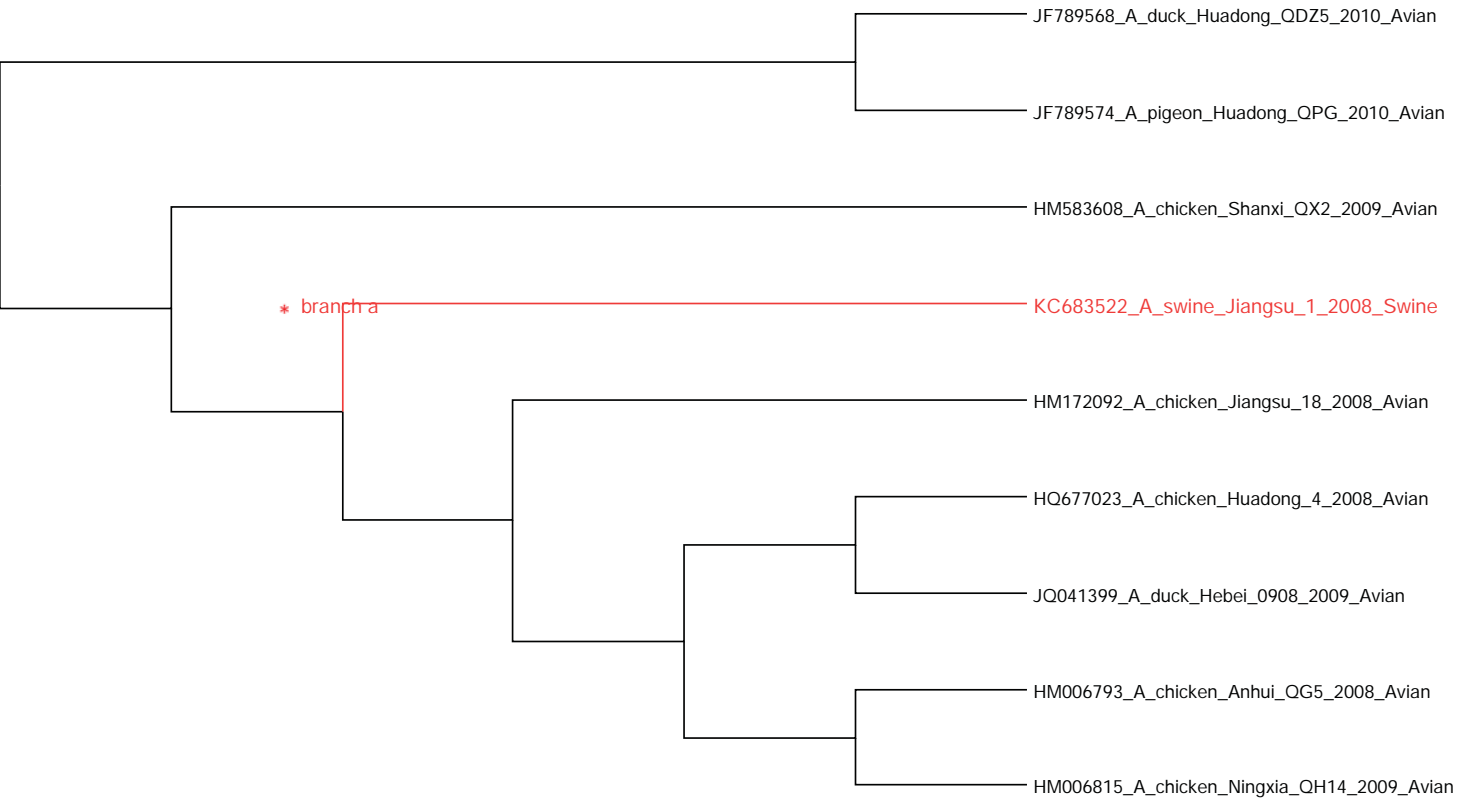

# HA-Group75

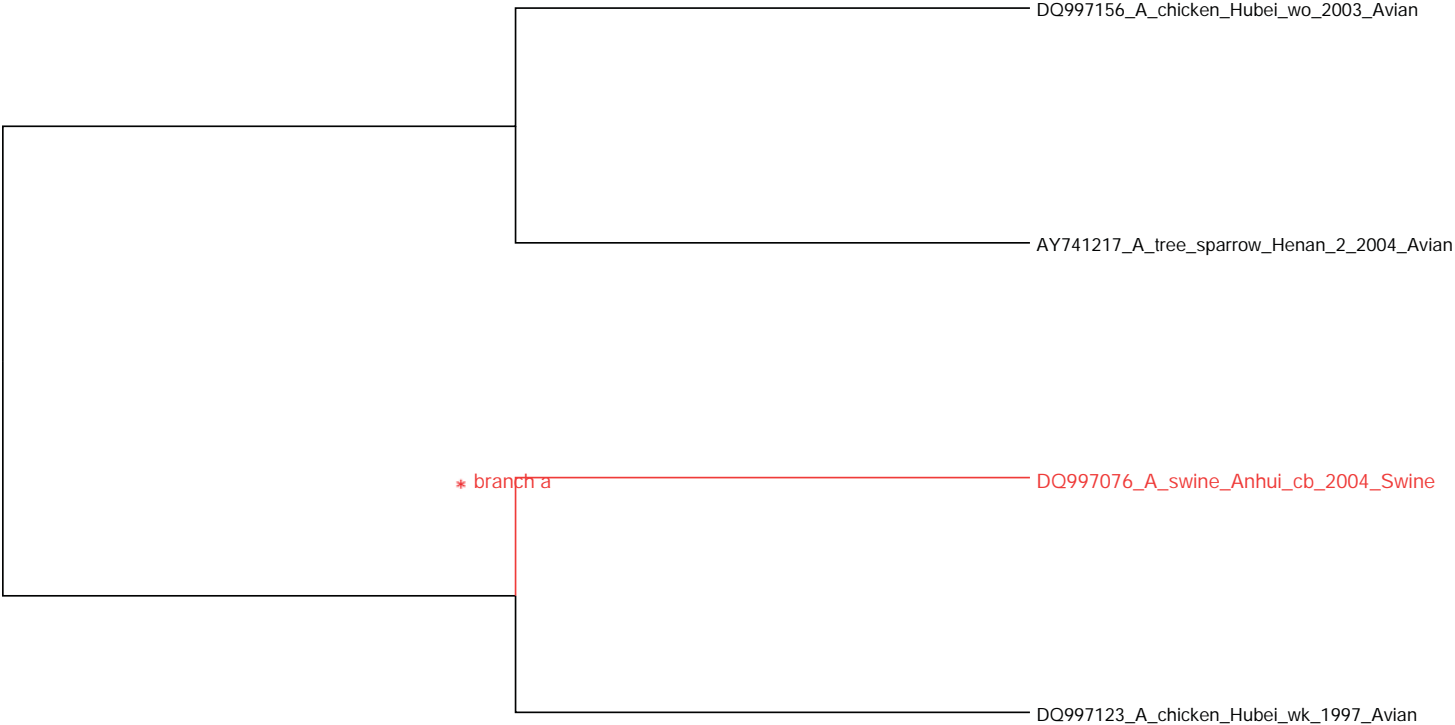

# HA-Group76

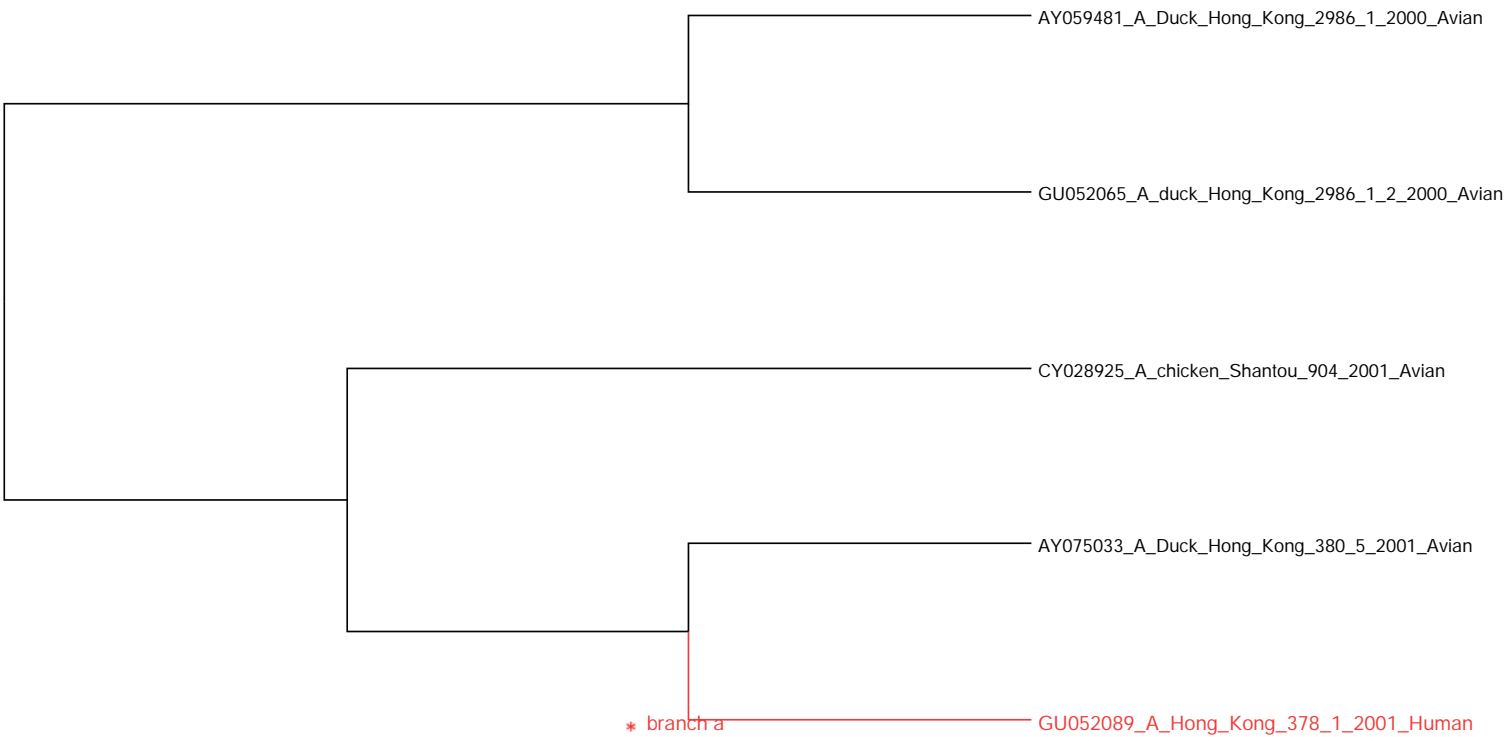

# HA-Group77

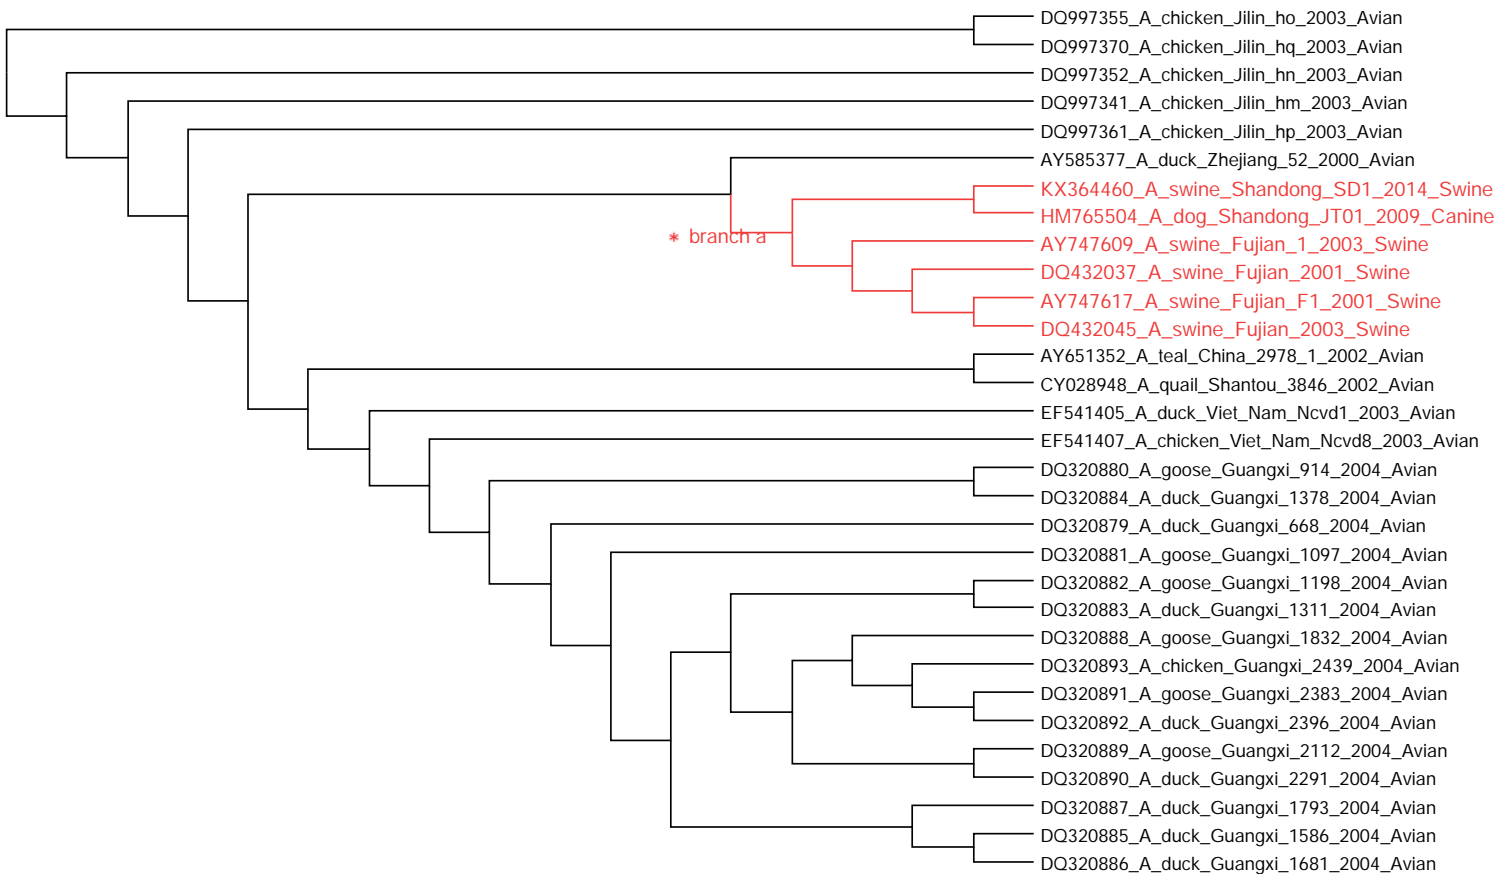

# HA-Group78

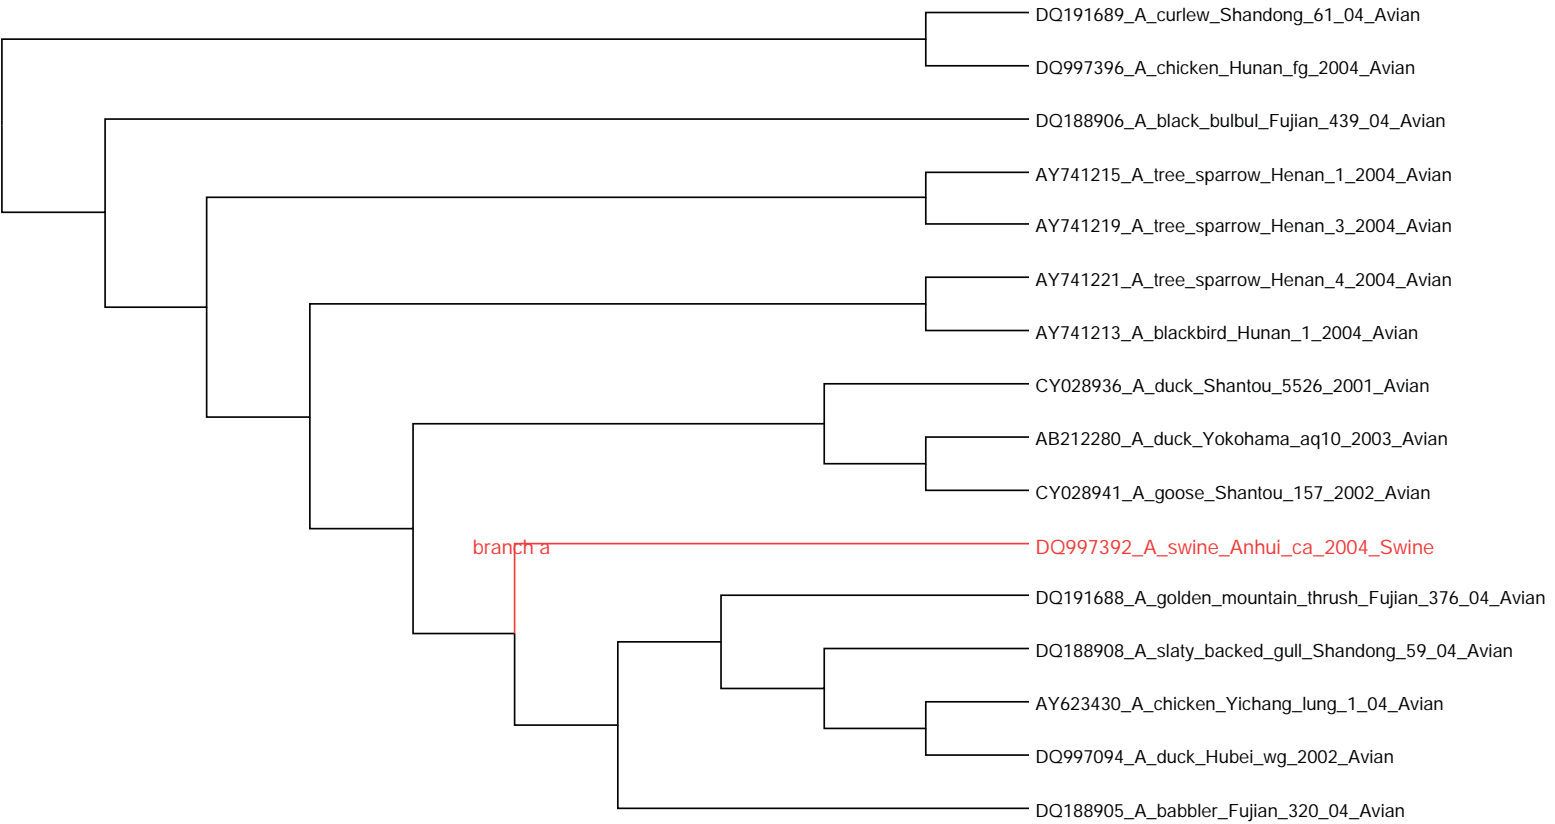

# HA-Group79

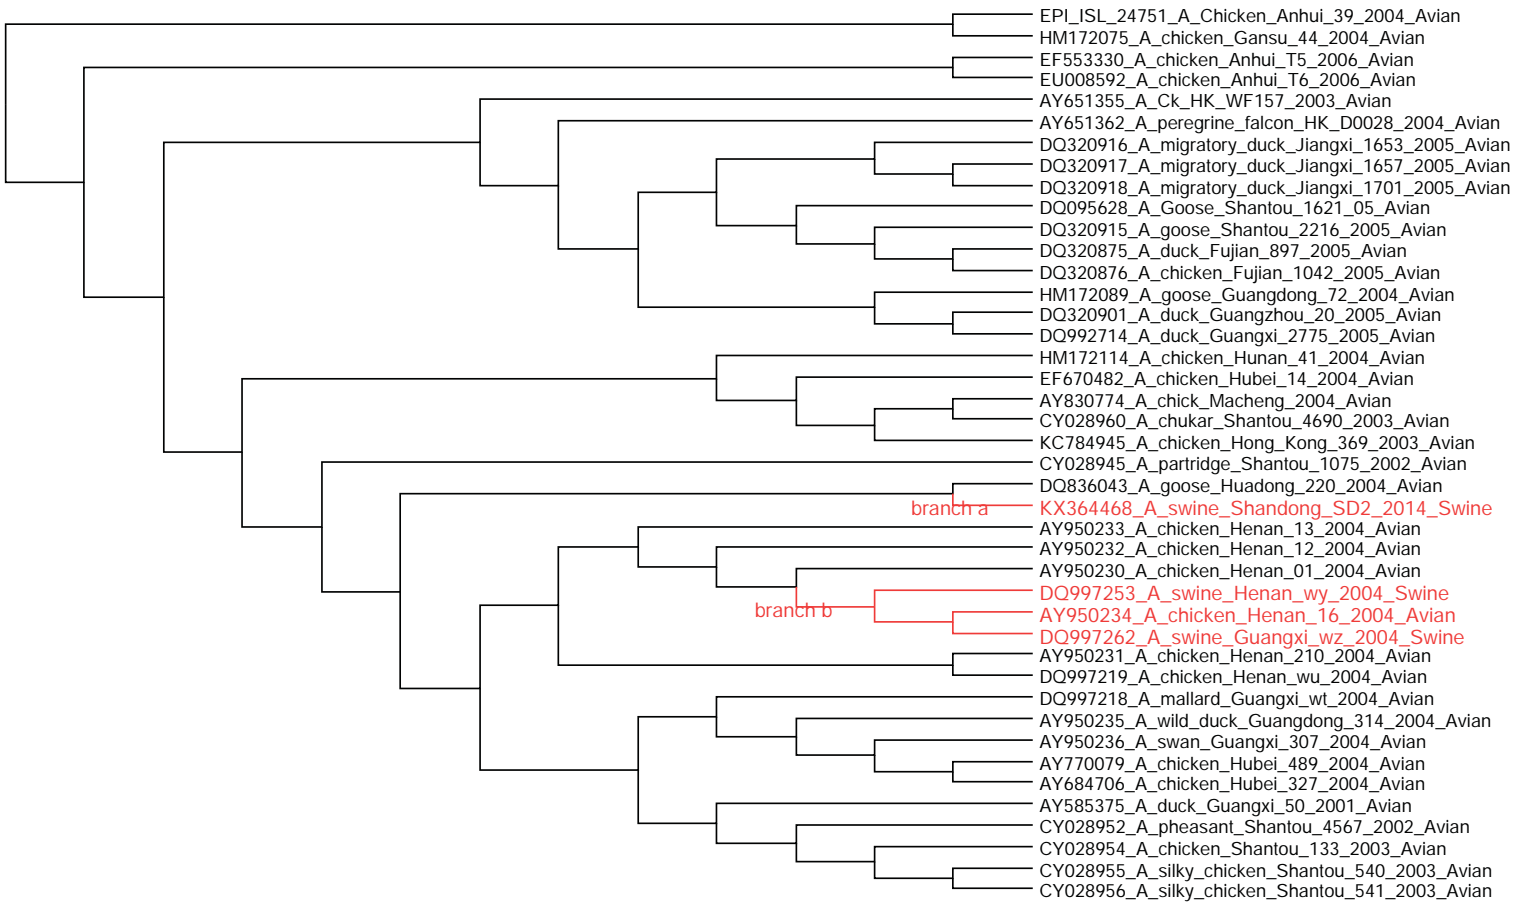

# HA-Group80

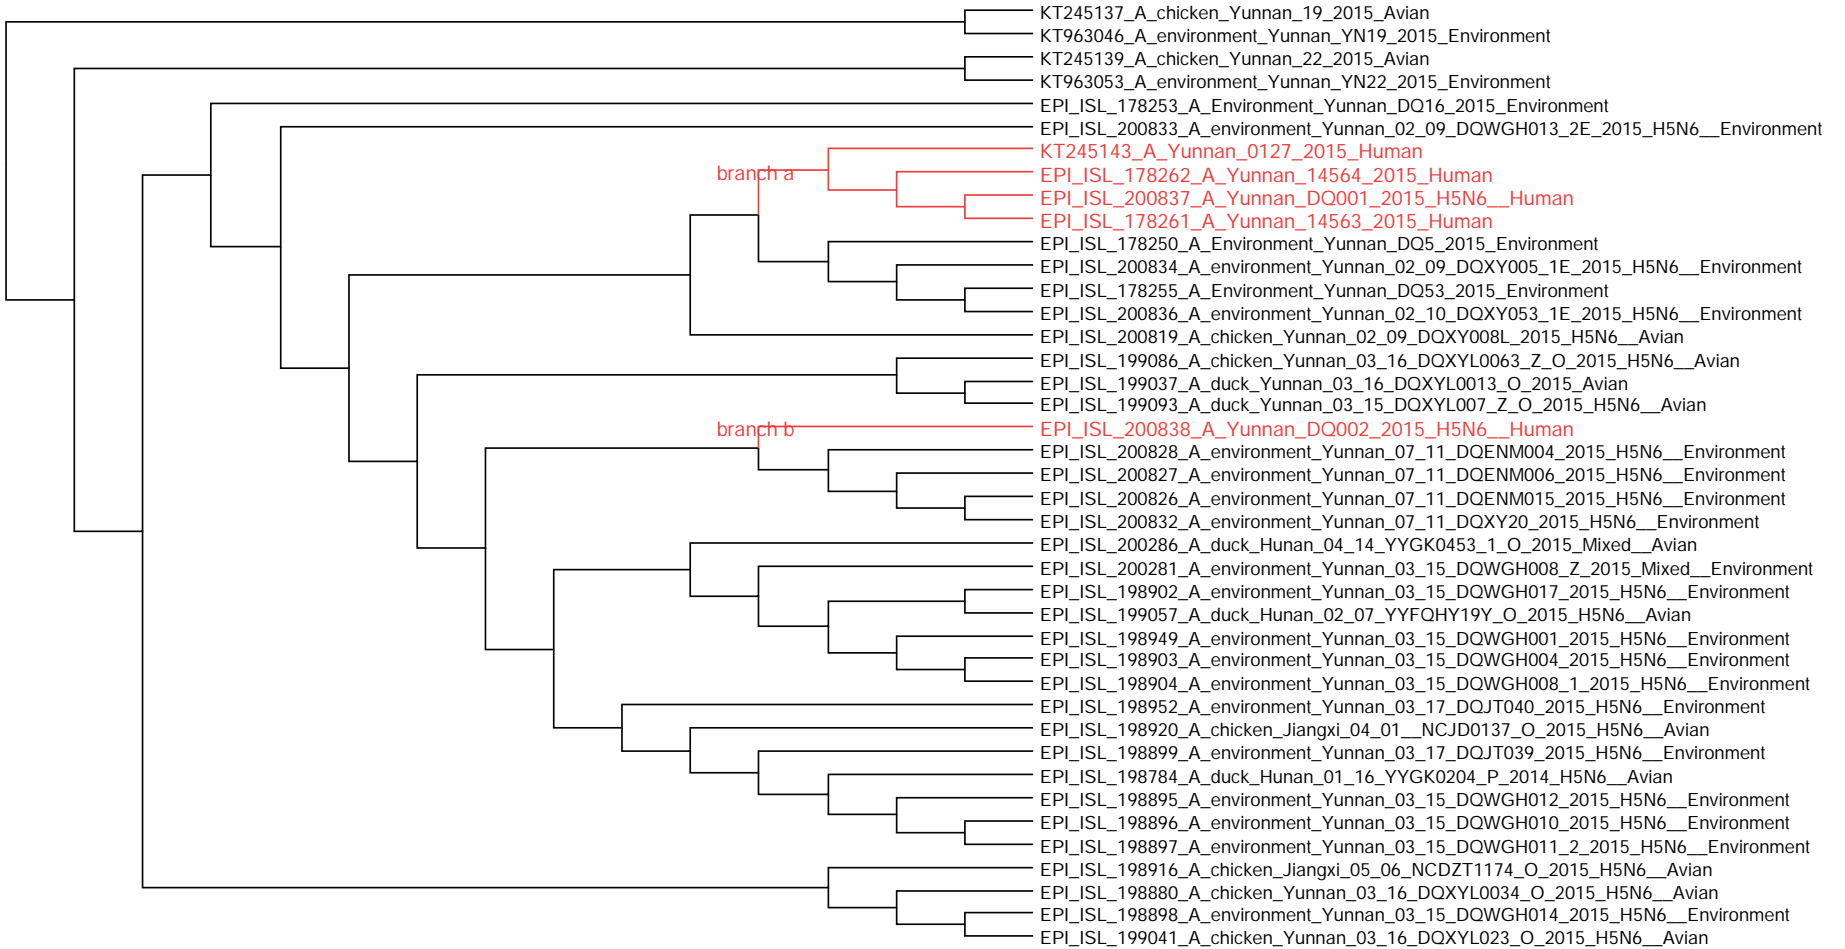



# HA-Group81

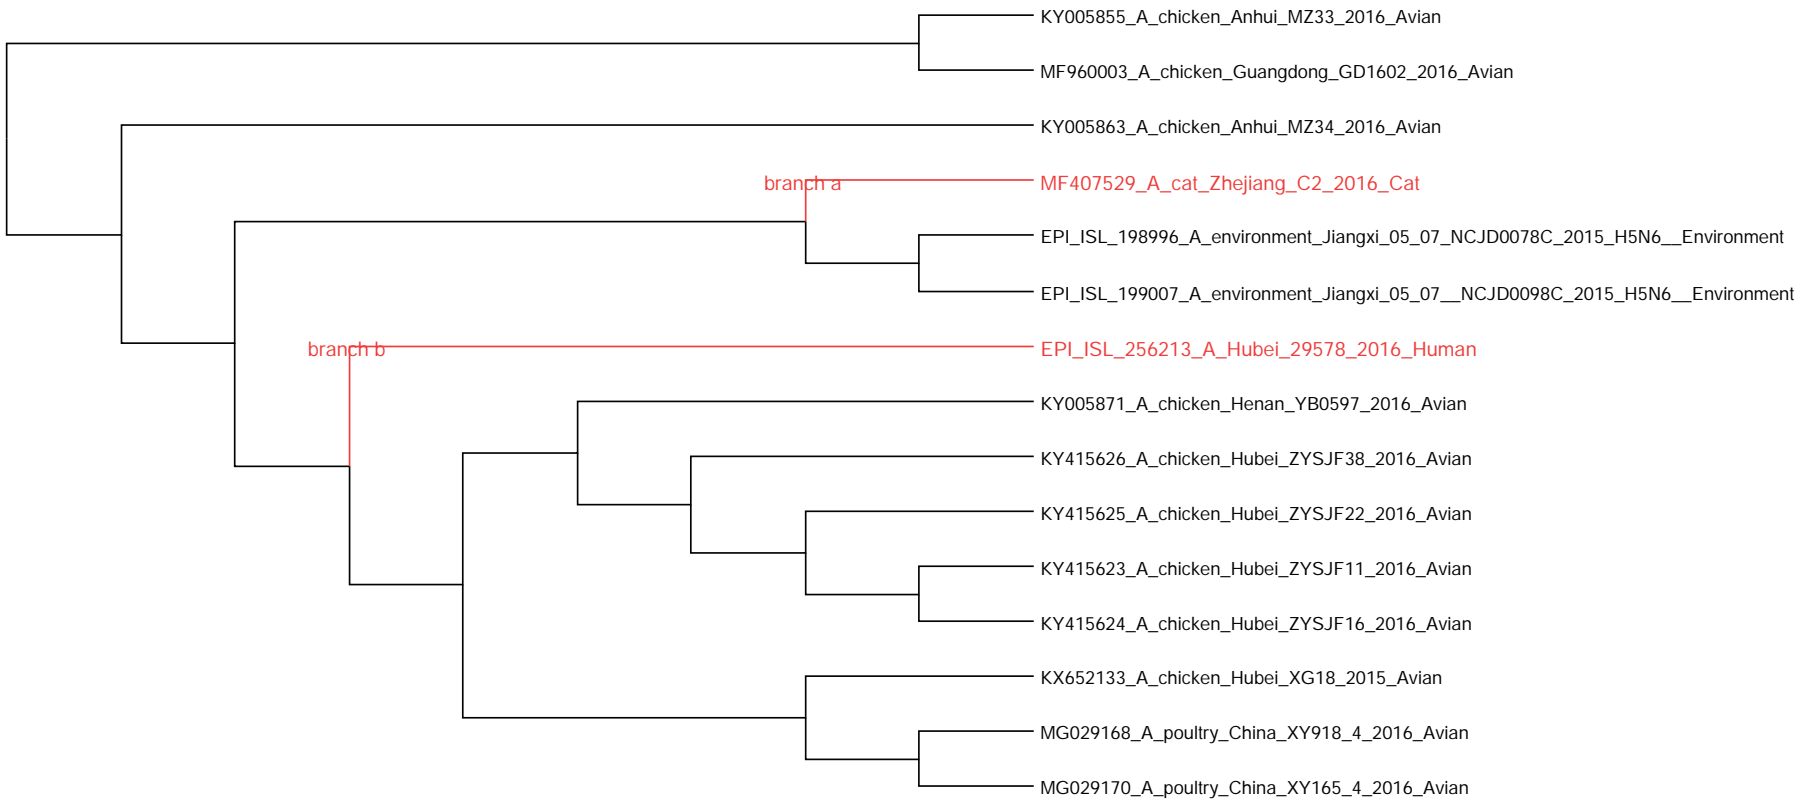

# HA-Group82

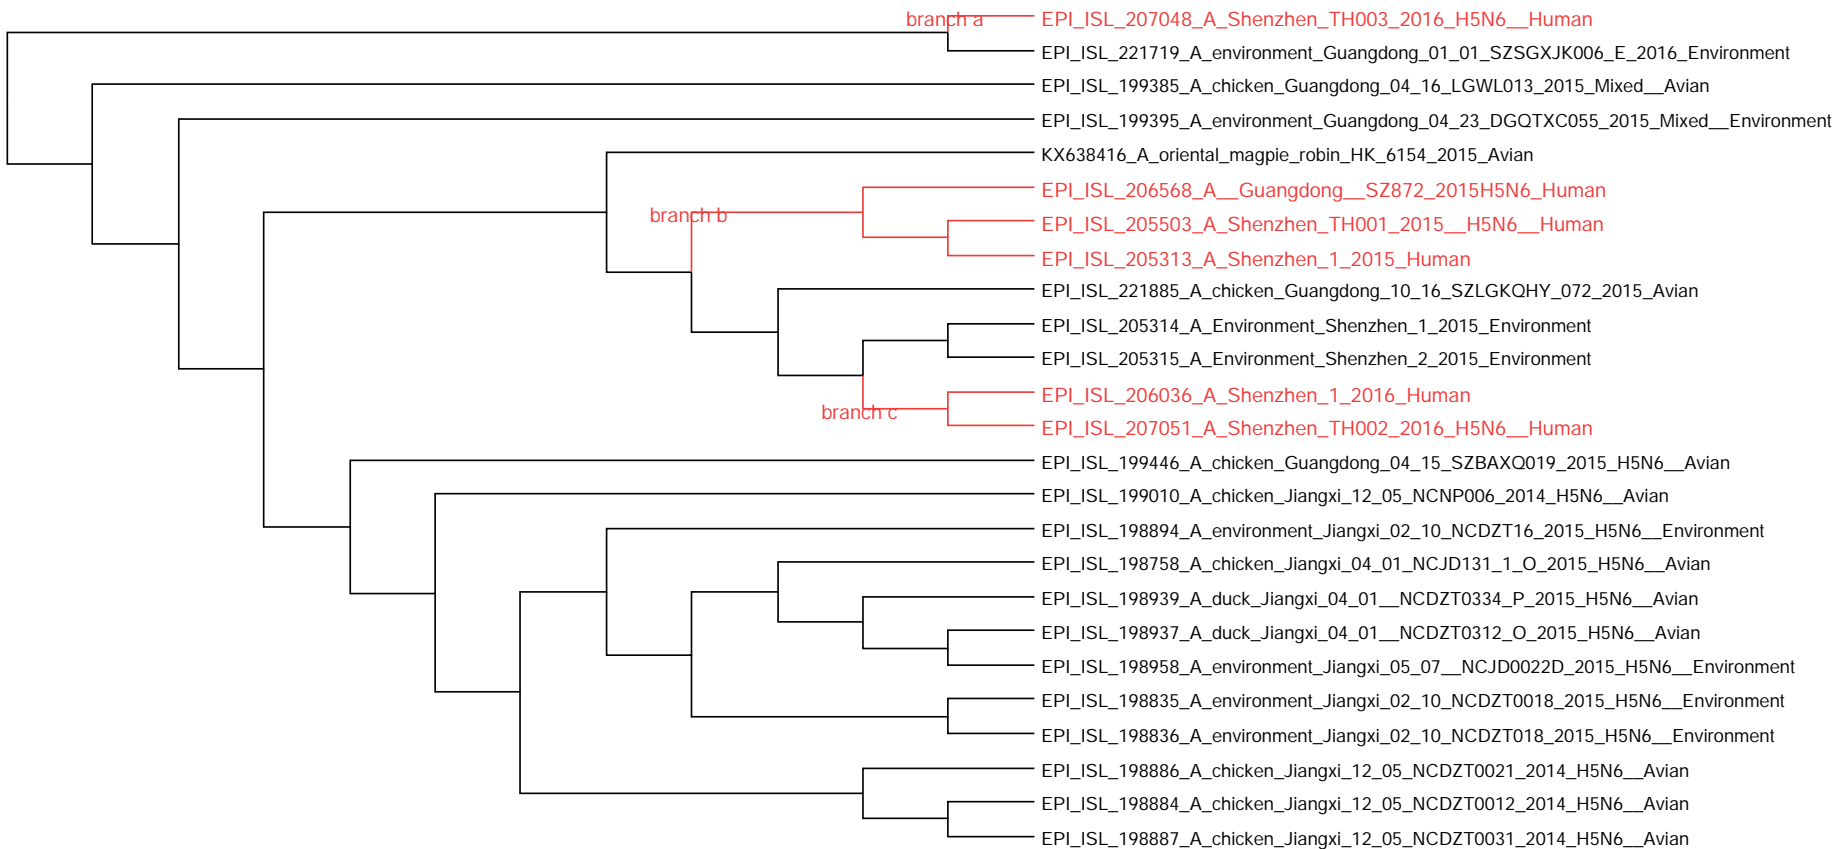

# HA-Group83

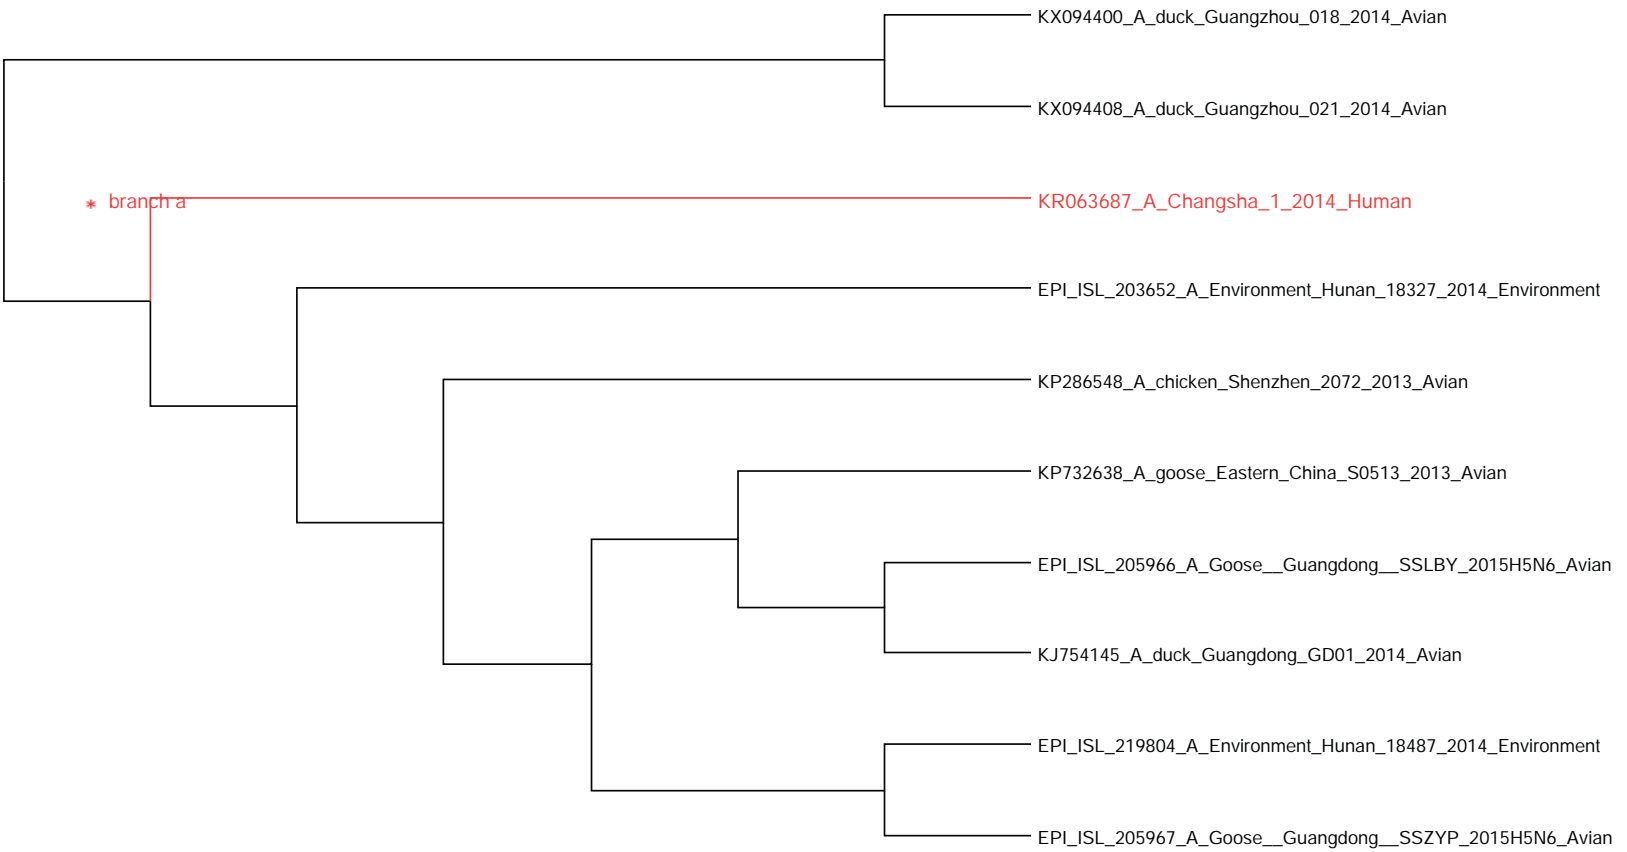

# HA-Group84

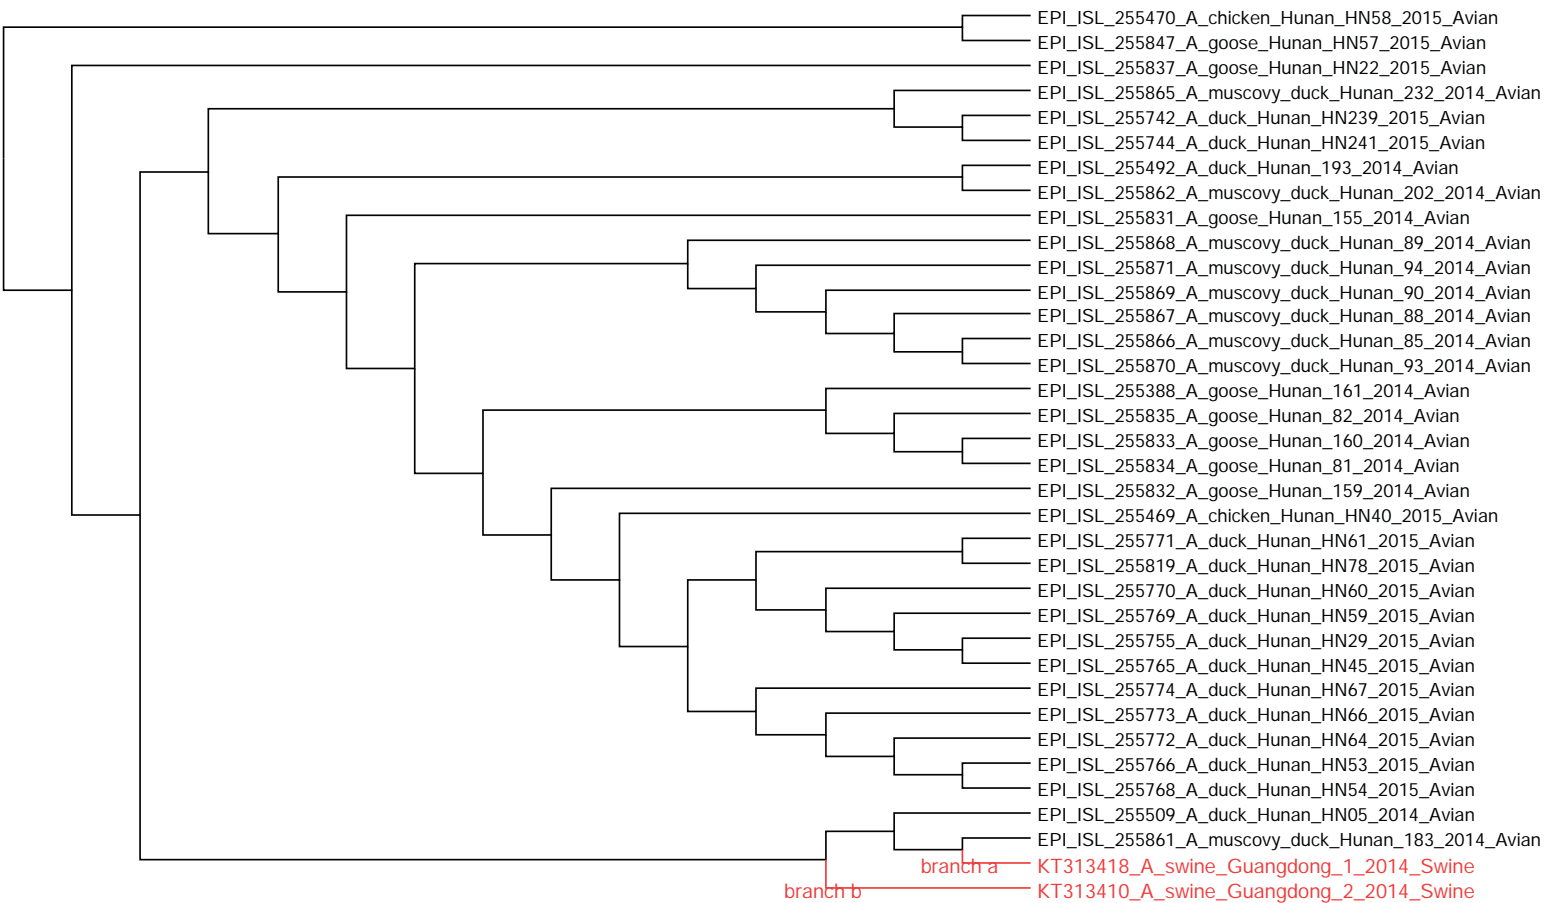

# HA-Group85

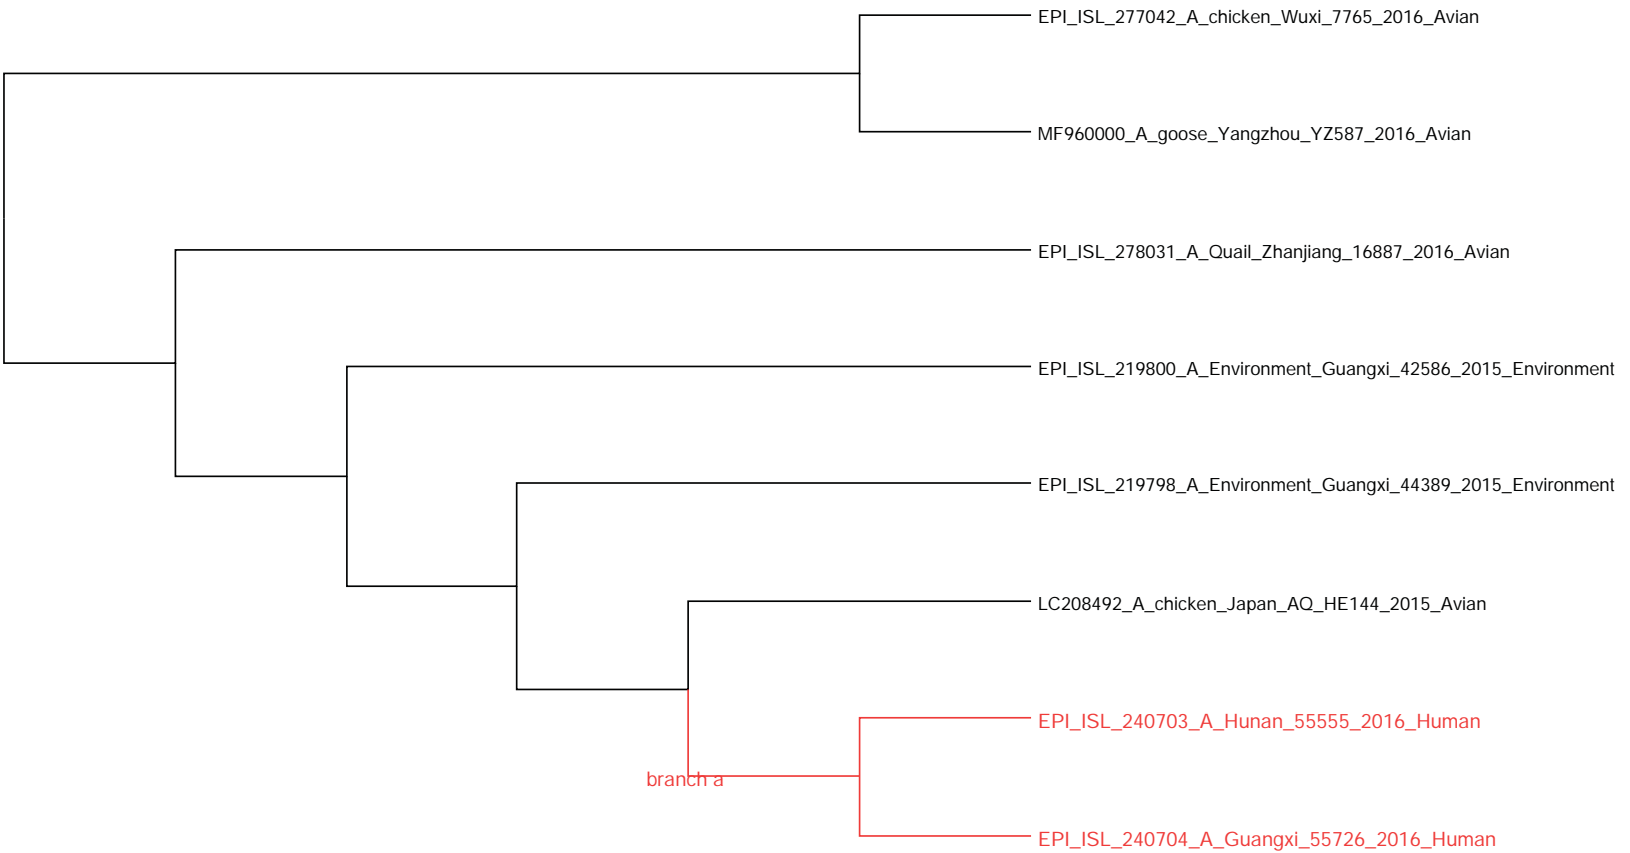

# HA-Group86

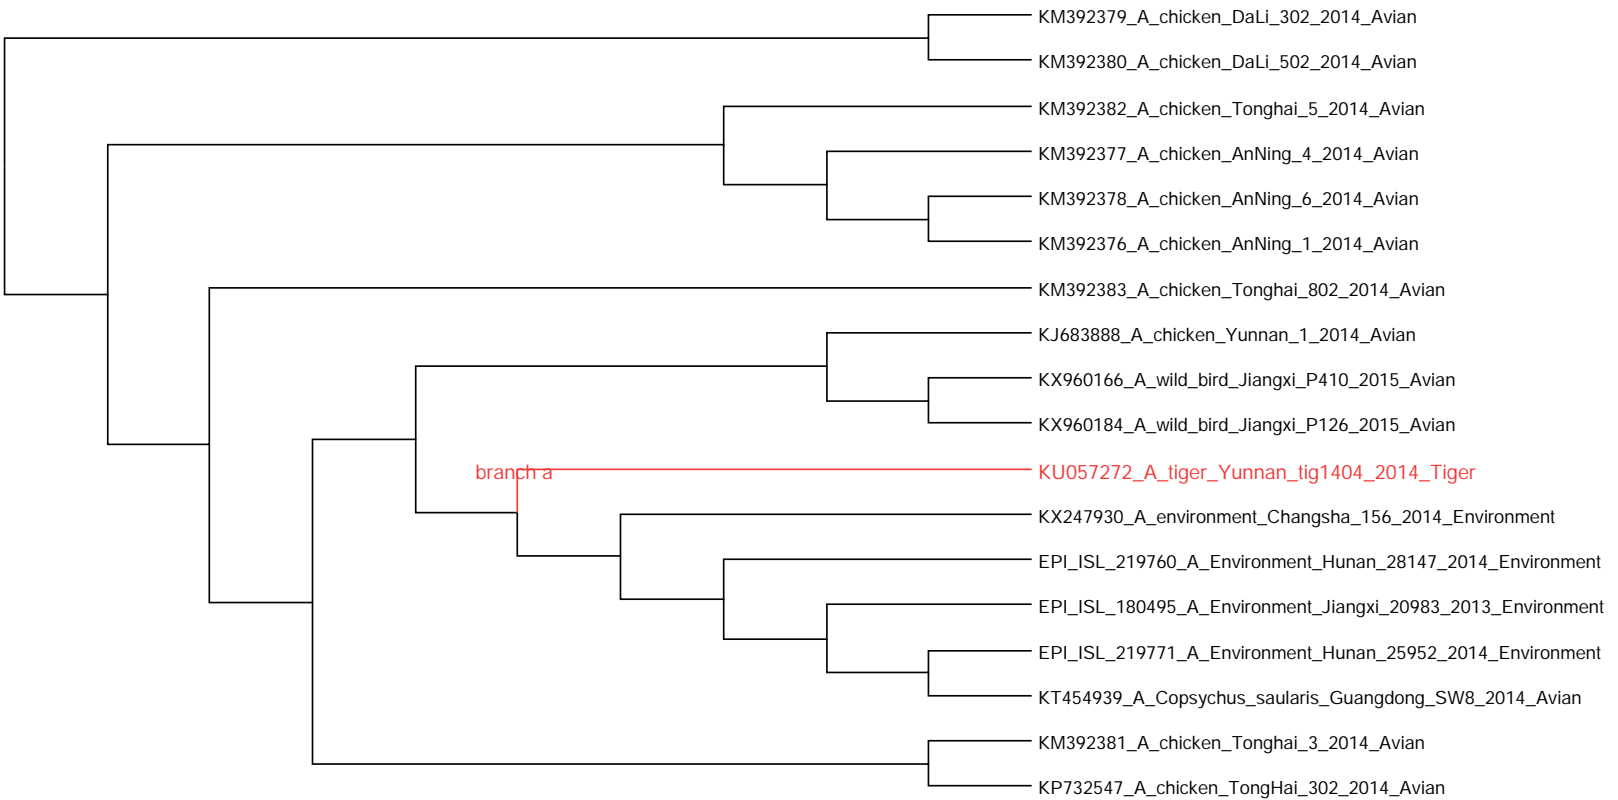

# HA-Group87

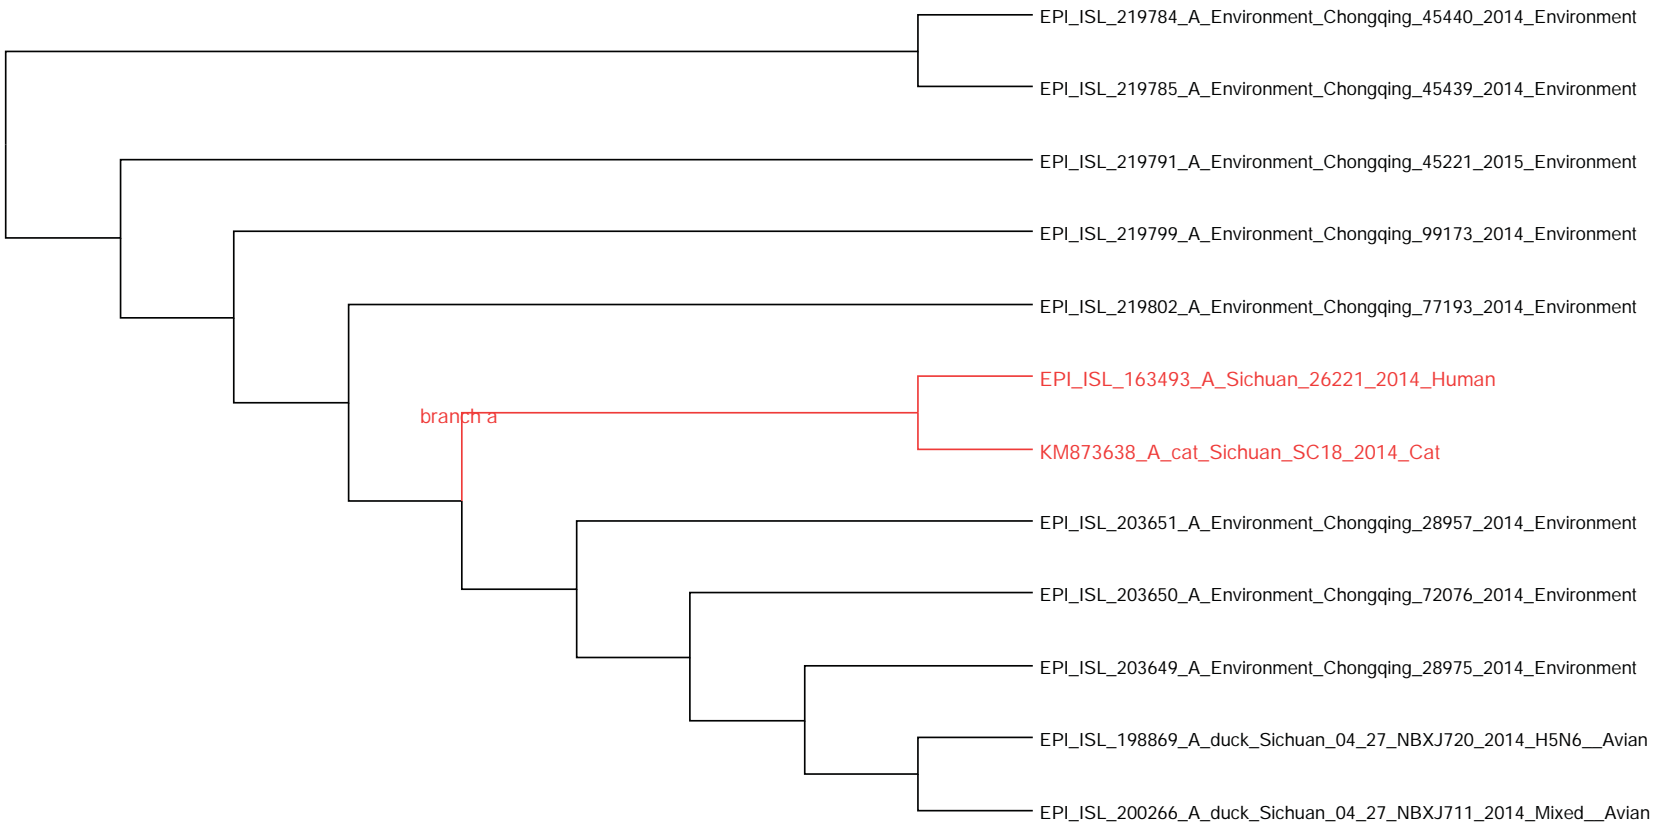

# HA-Group88

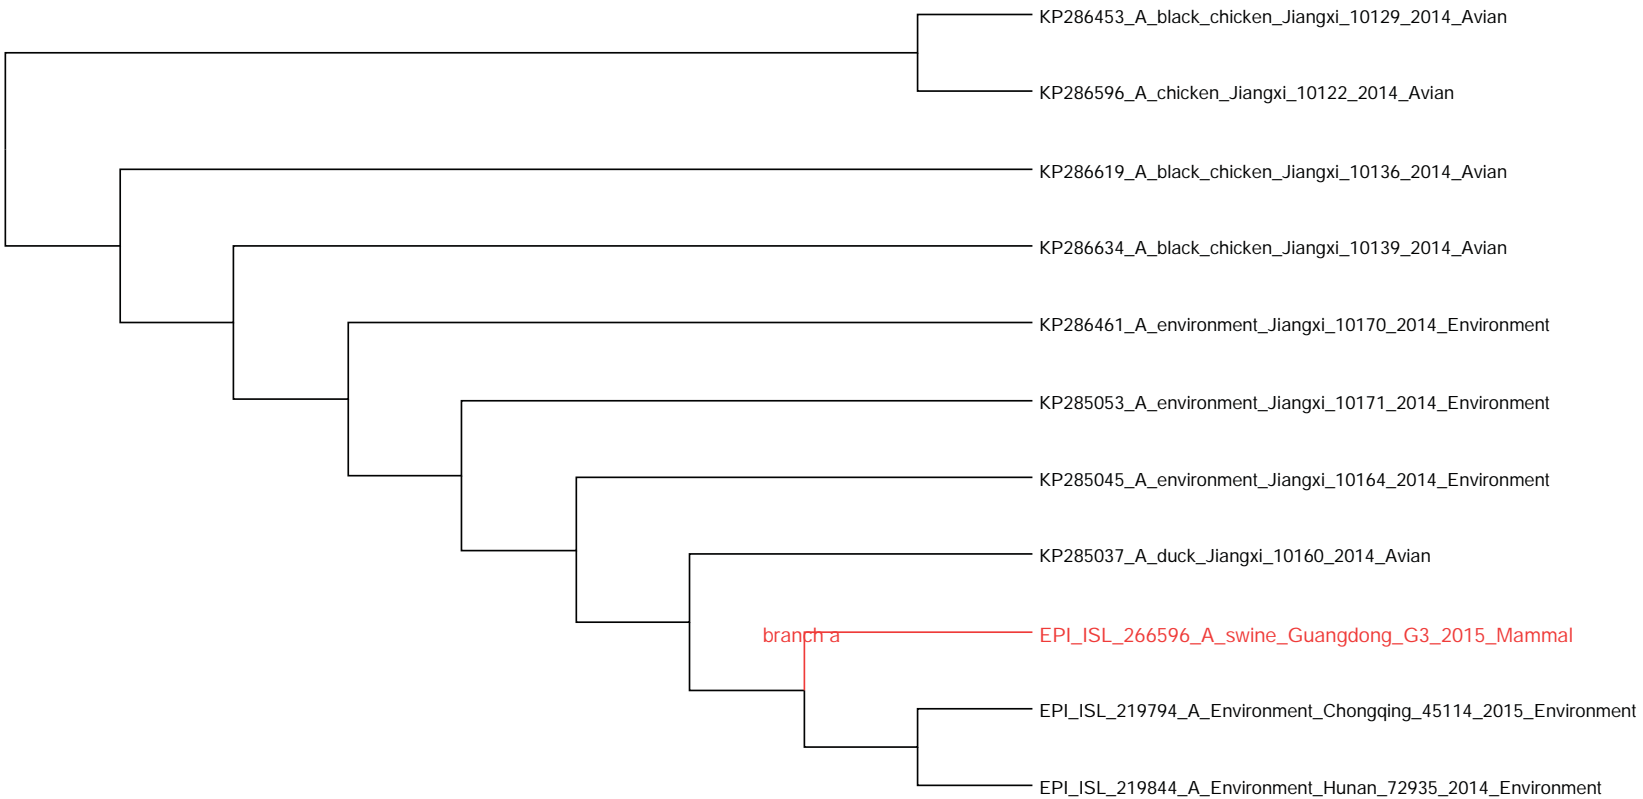



# HA-Group89

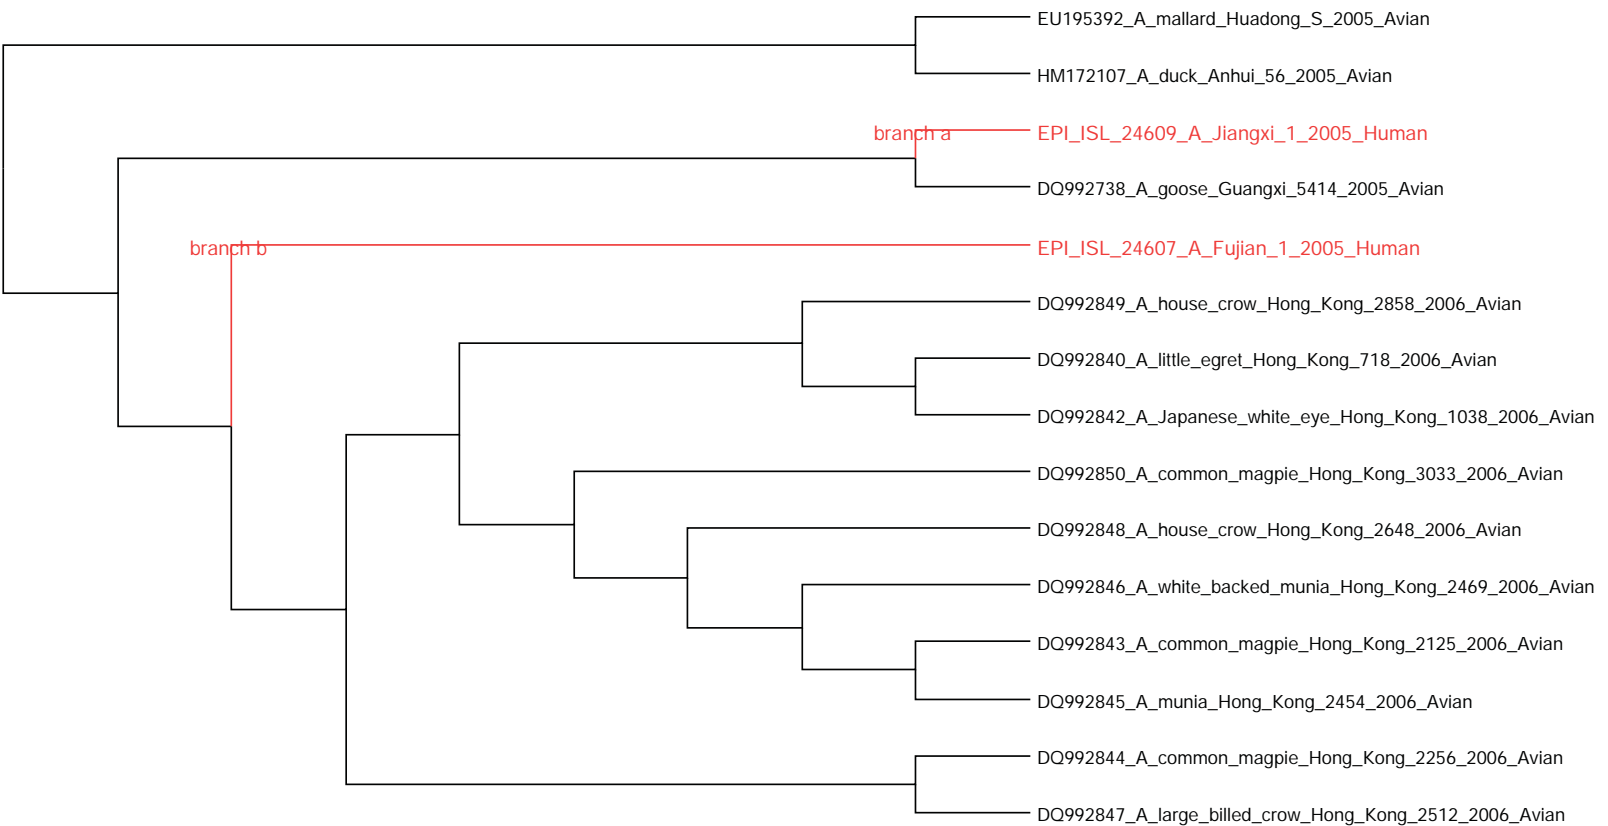

# HA-Group90

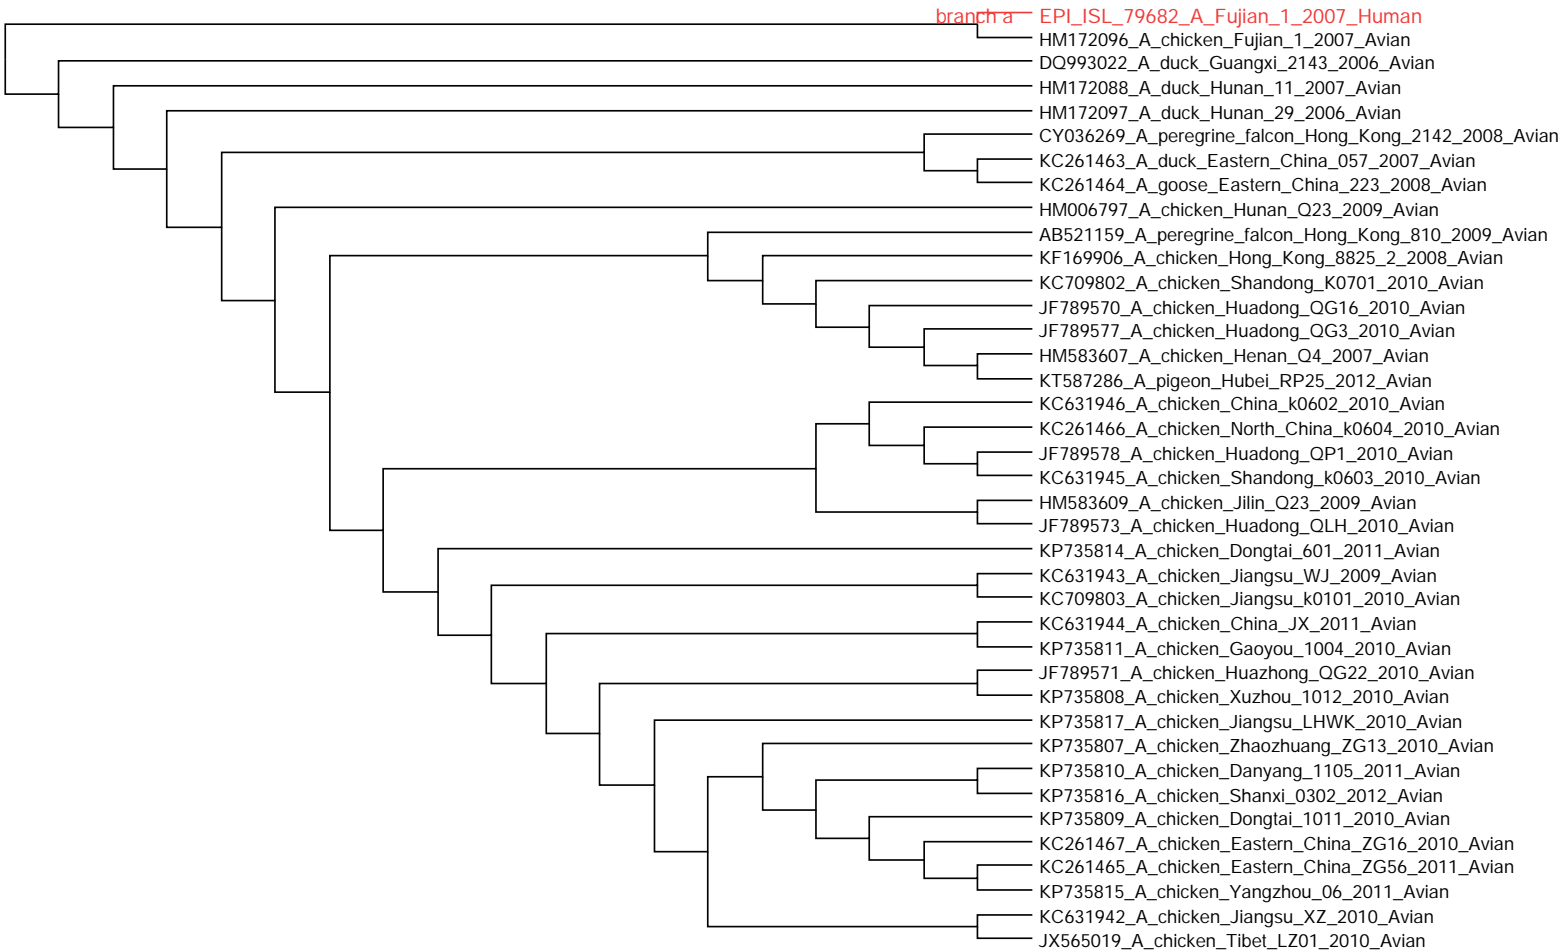

# HA-Group91

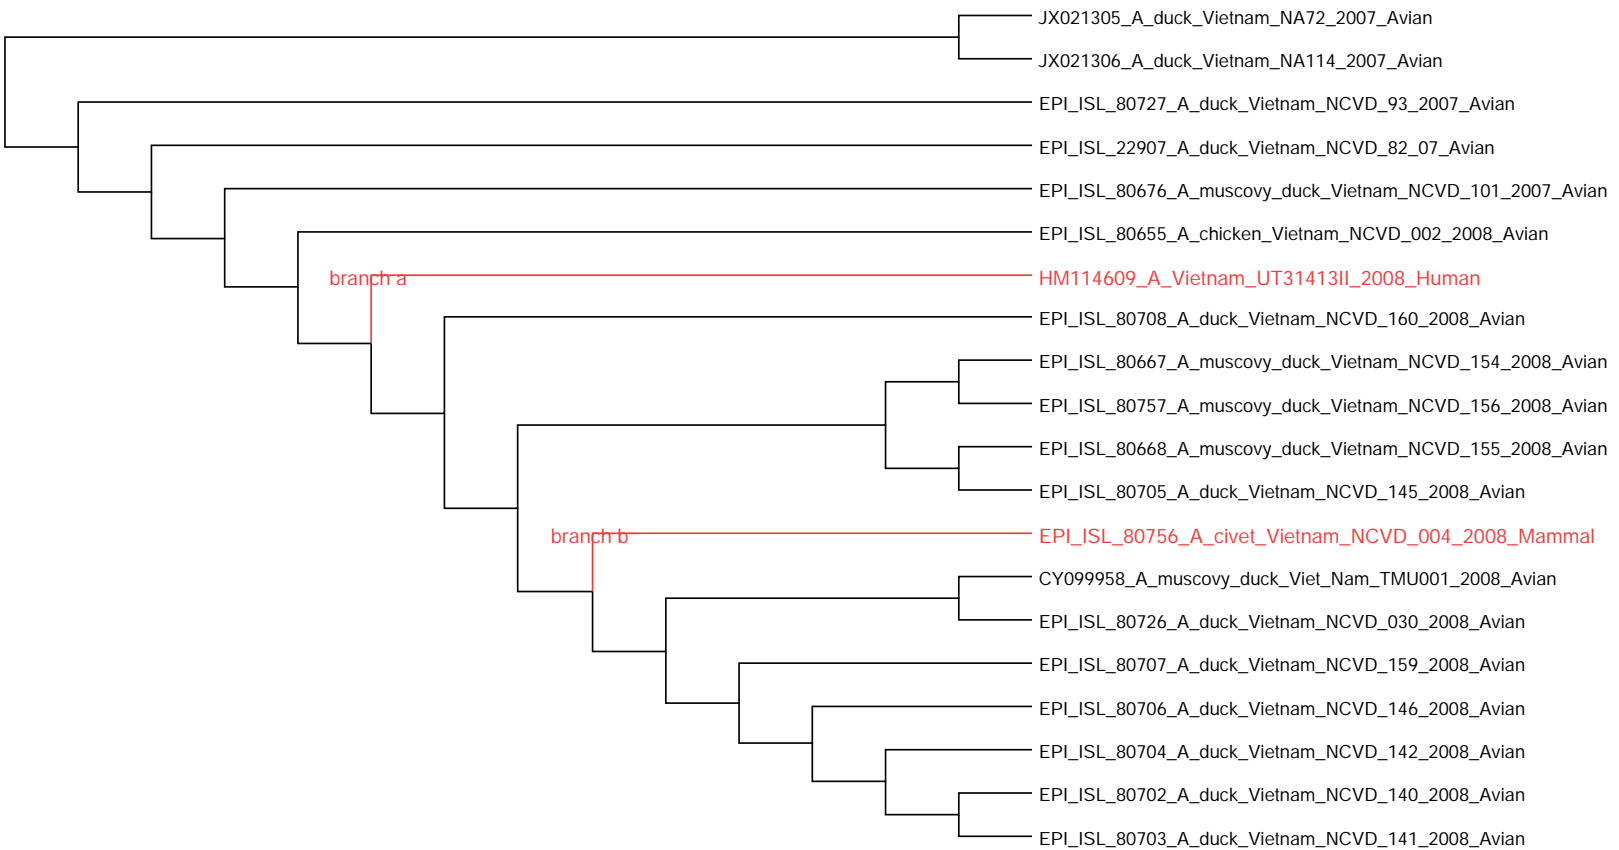

# HA-Group92

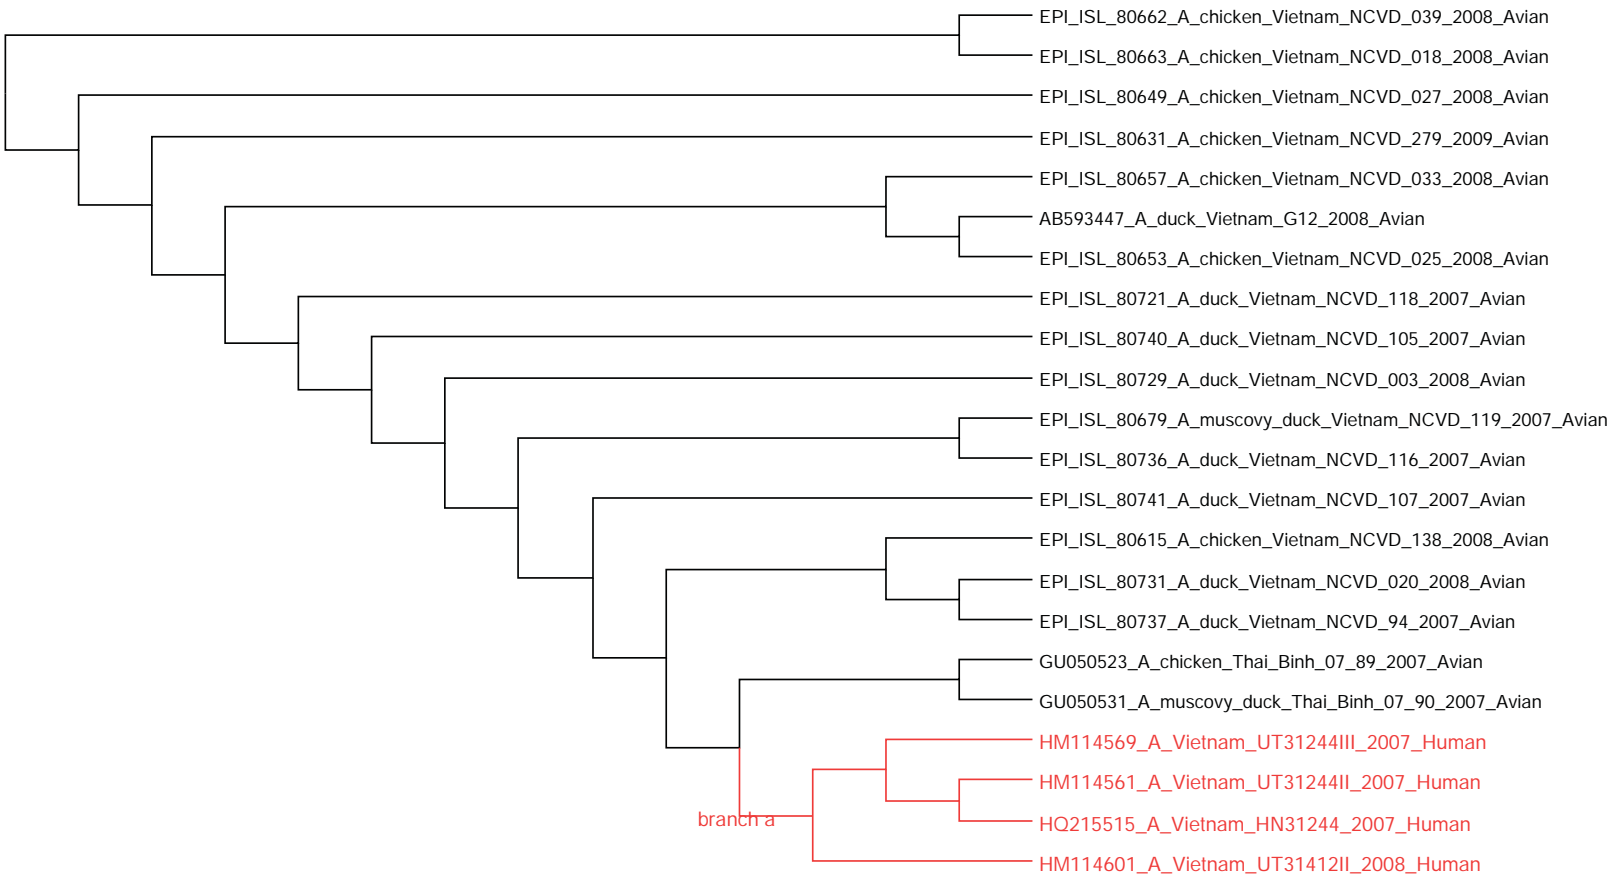

# HA-Group93

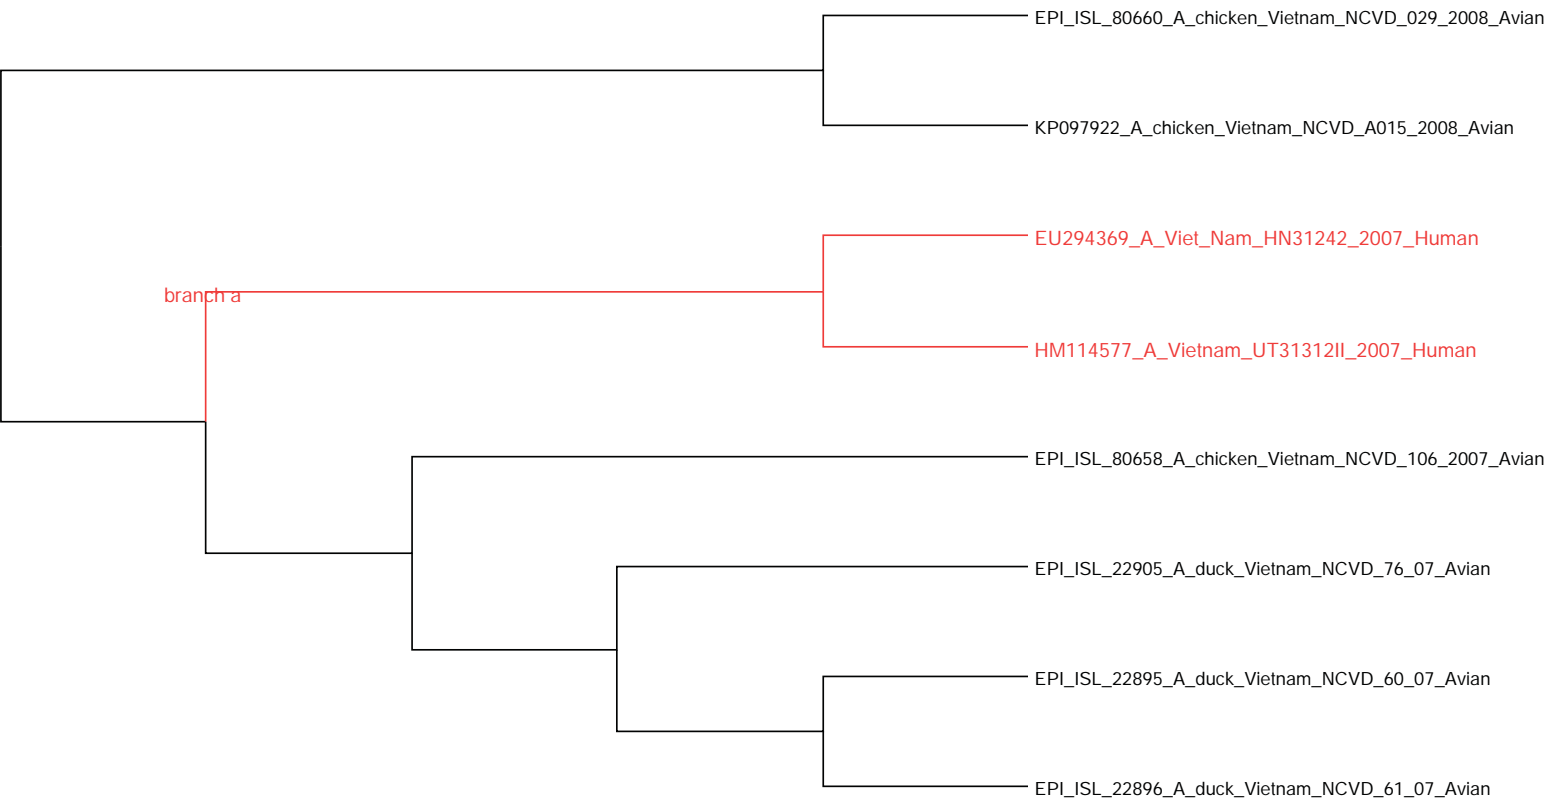

# HA-Group94

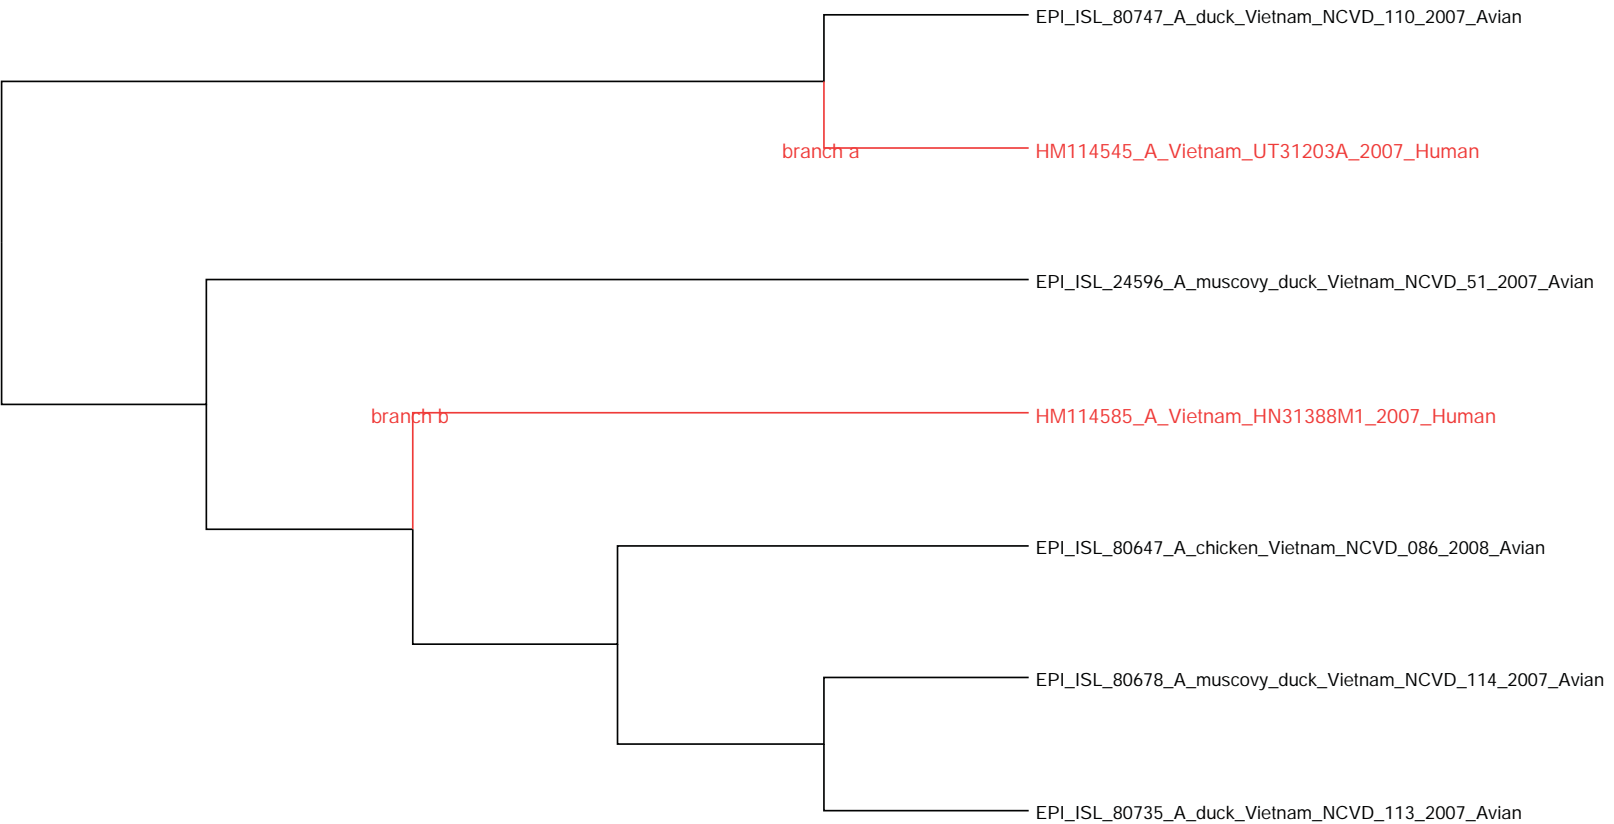

# HA-Group95

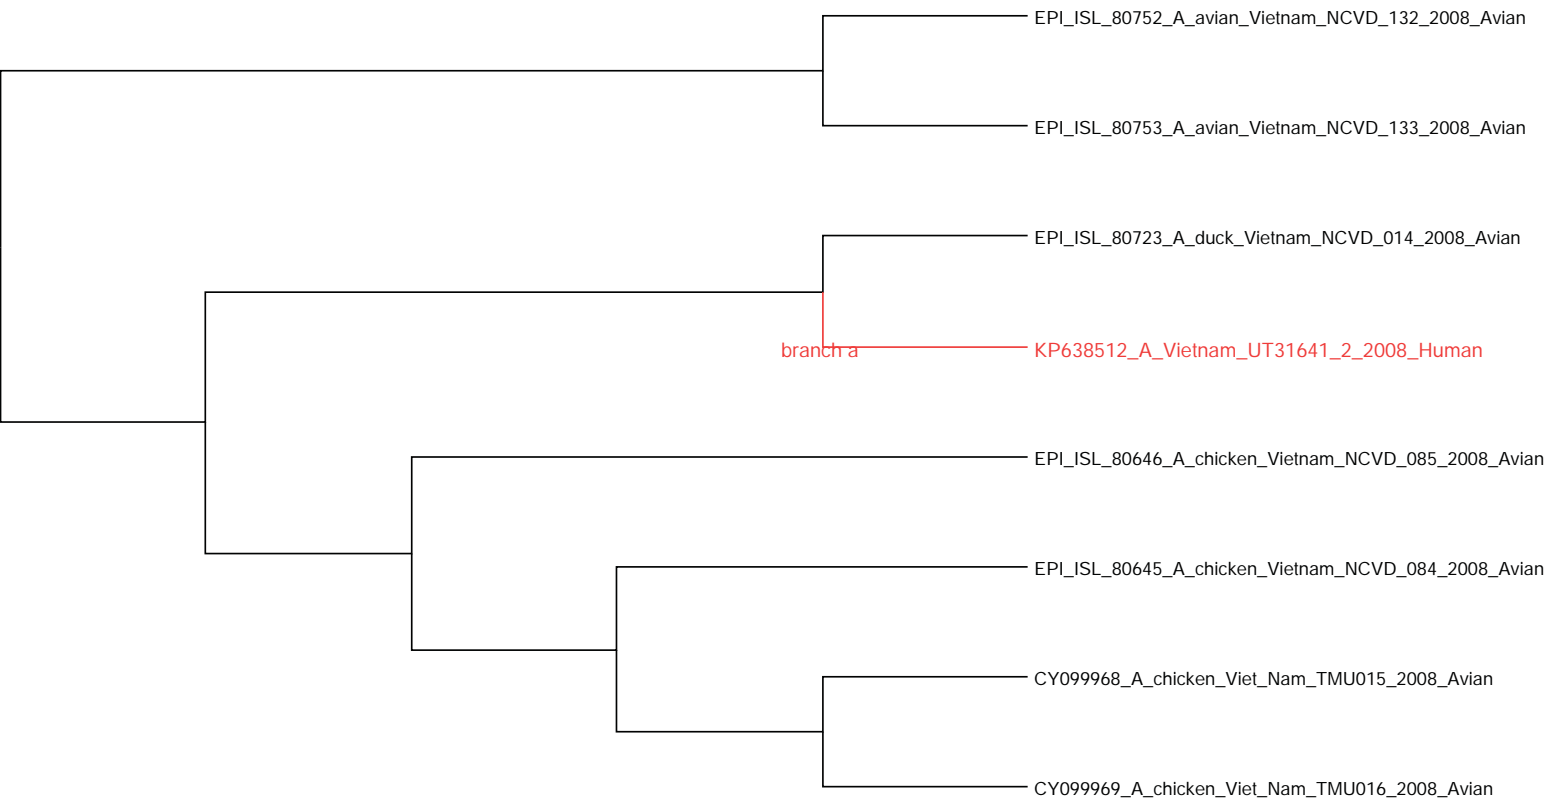

# HA-Group96

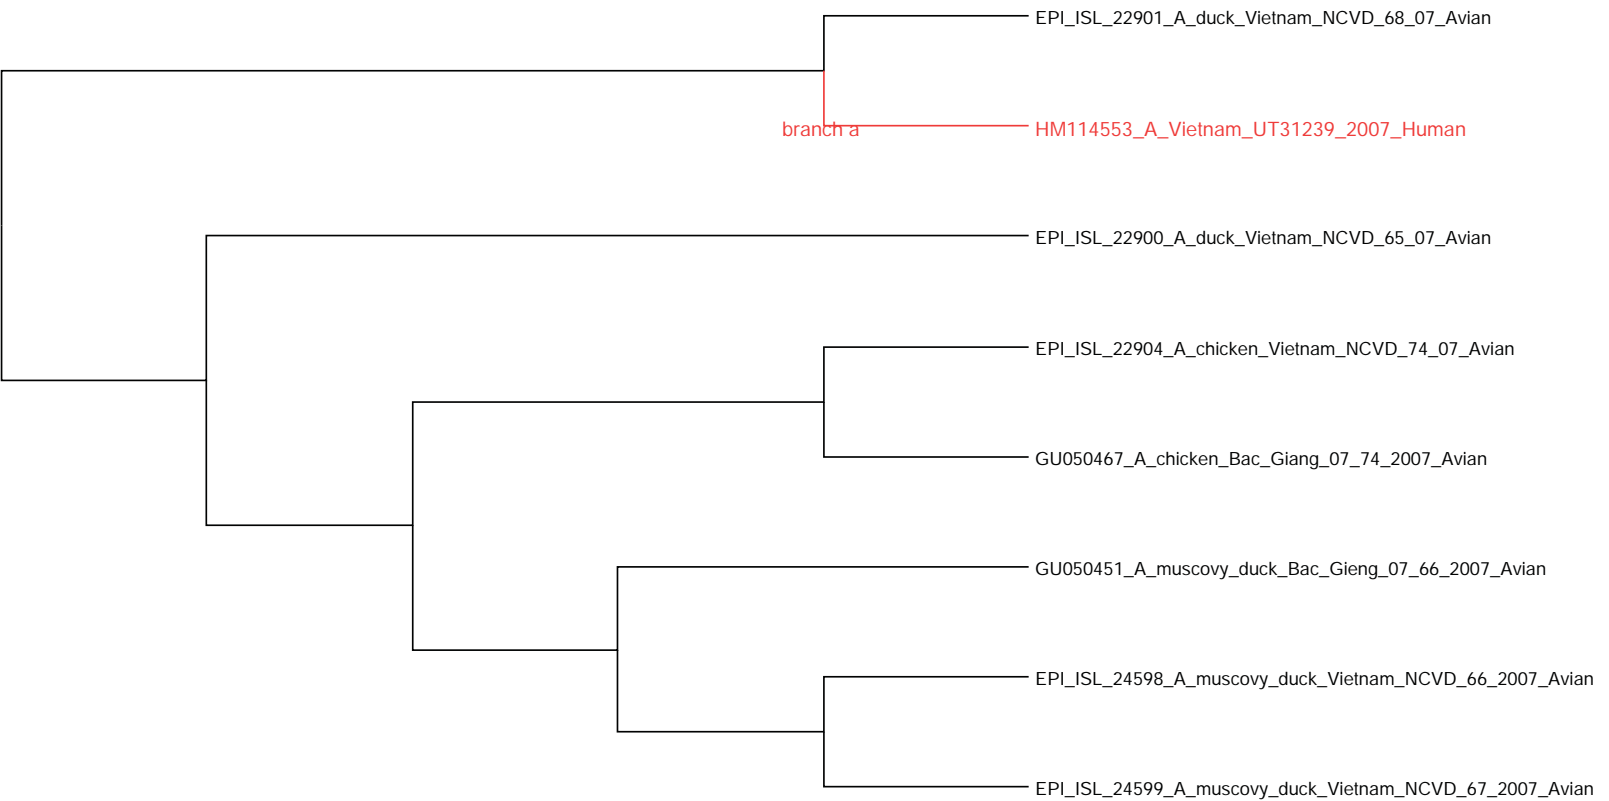



# HA-Group97

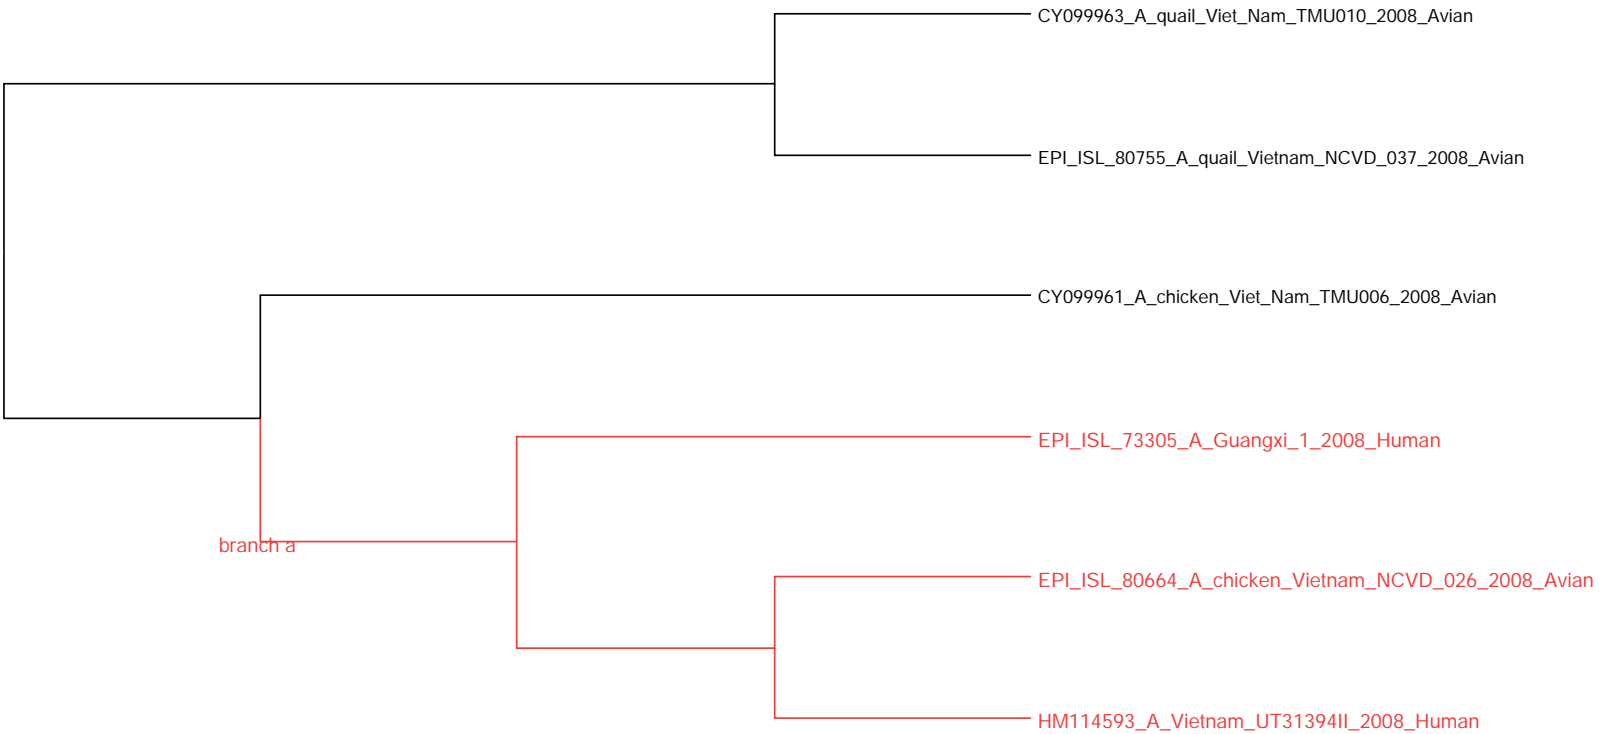

# HA-Group98

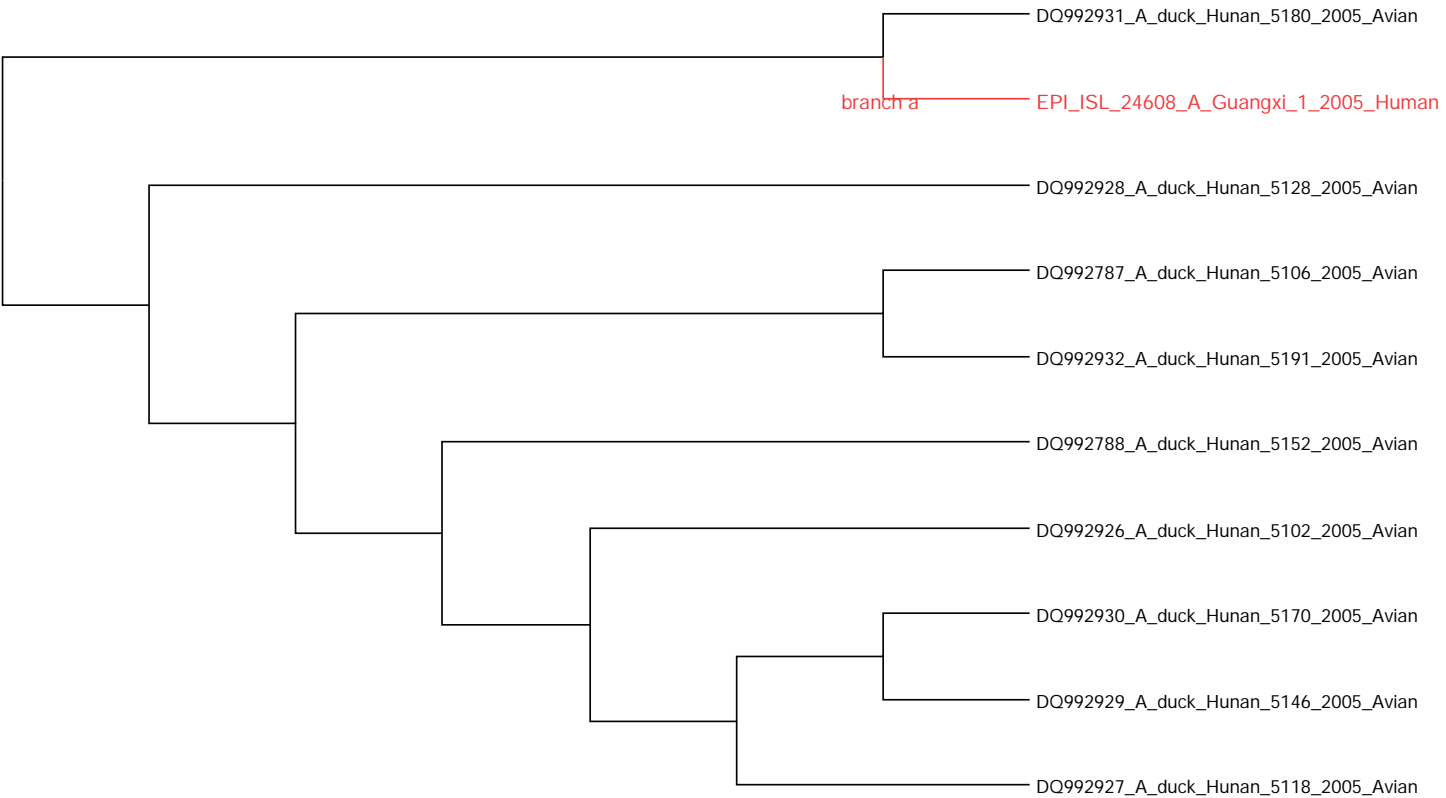

# HA-Group99

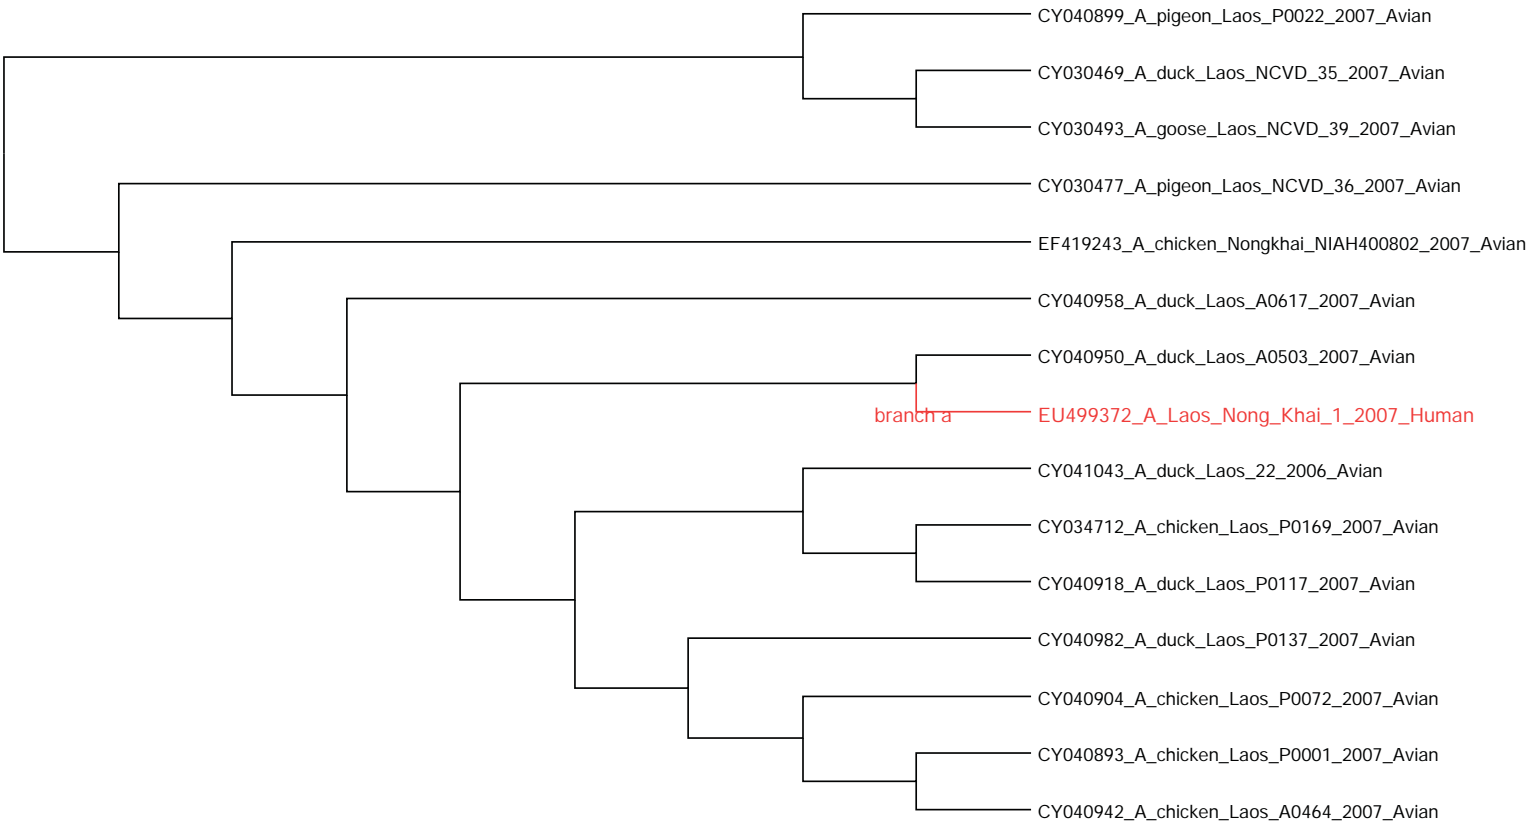

# HA-Group100

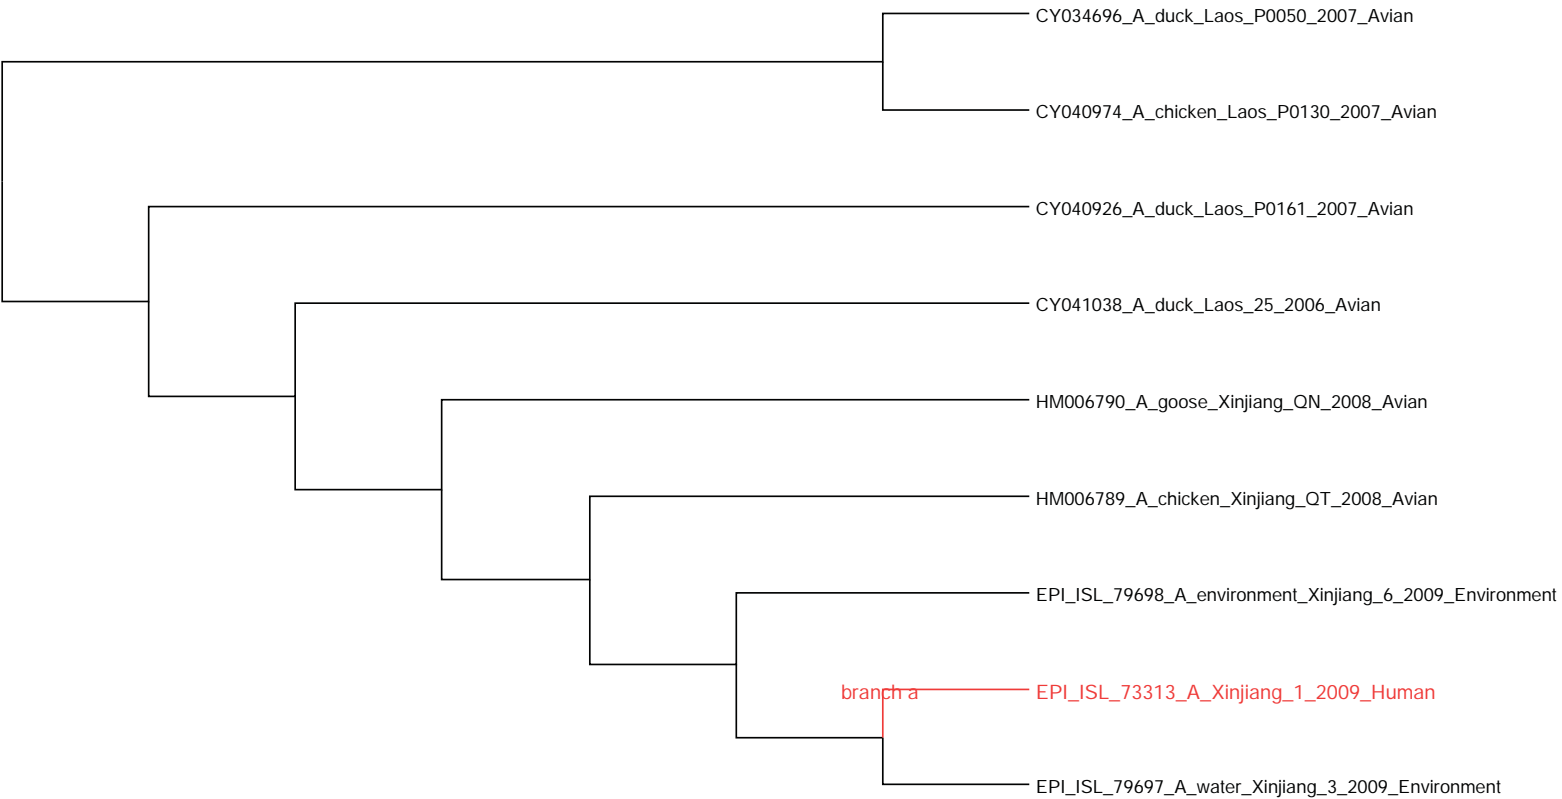

# HA-Group101

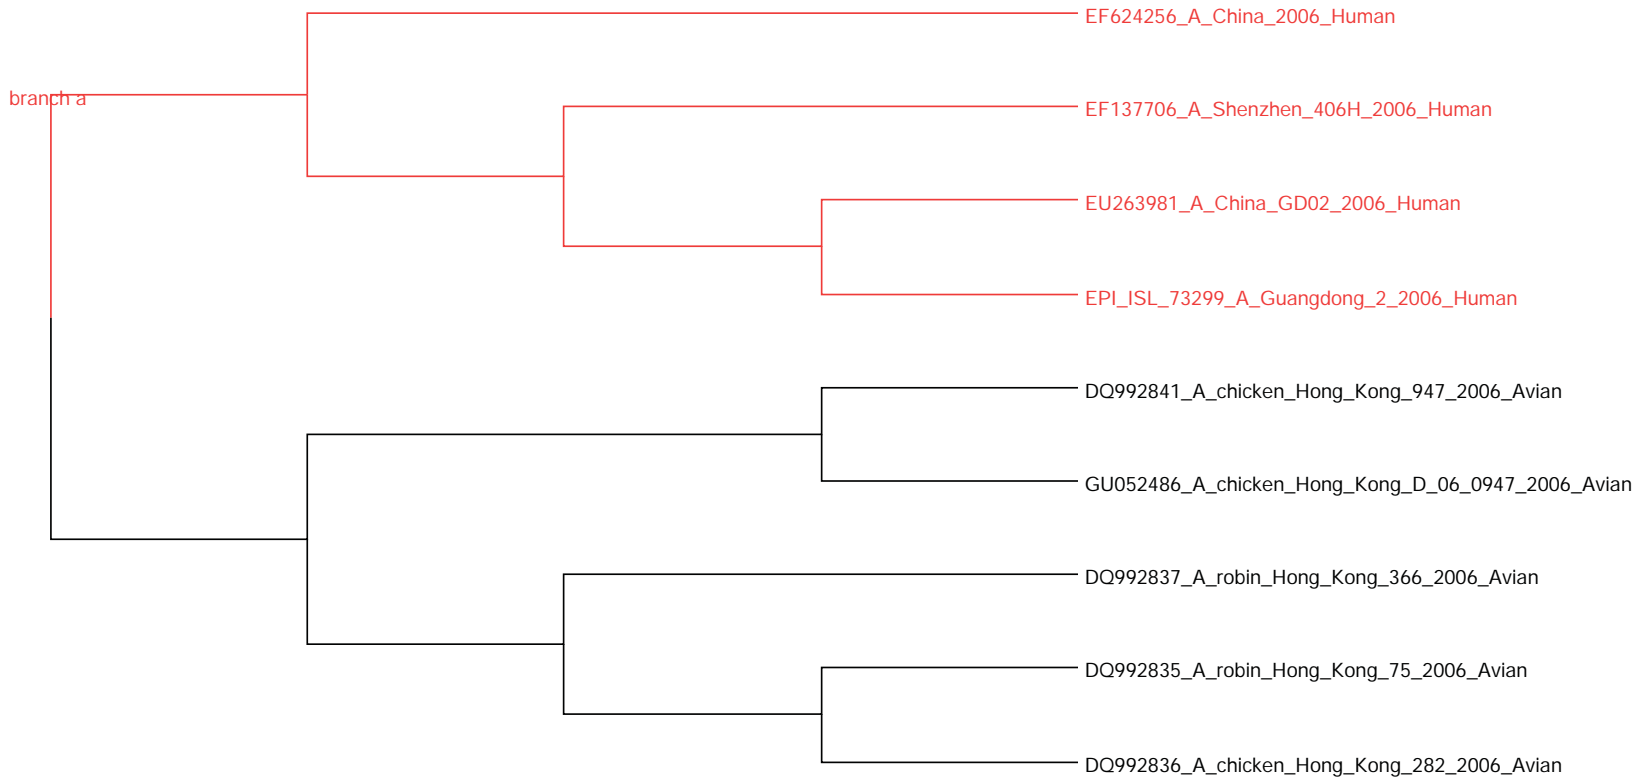

# HA-Group102

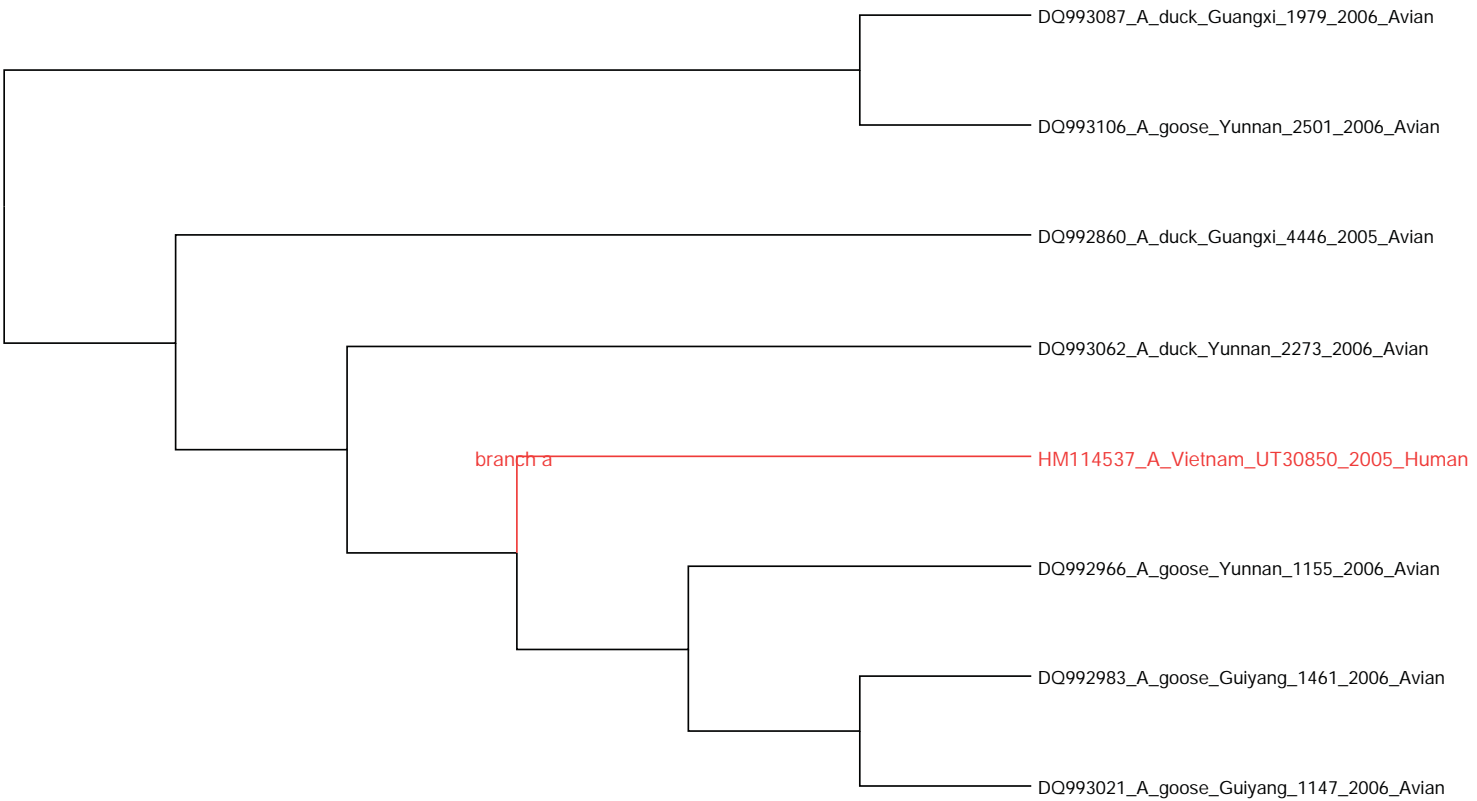

# HA-Group103

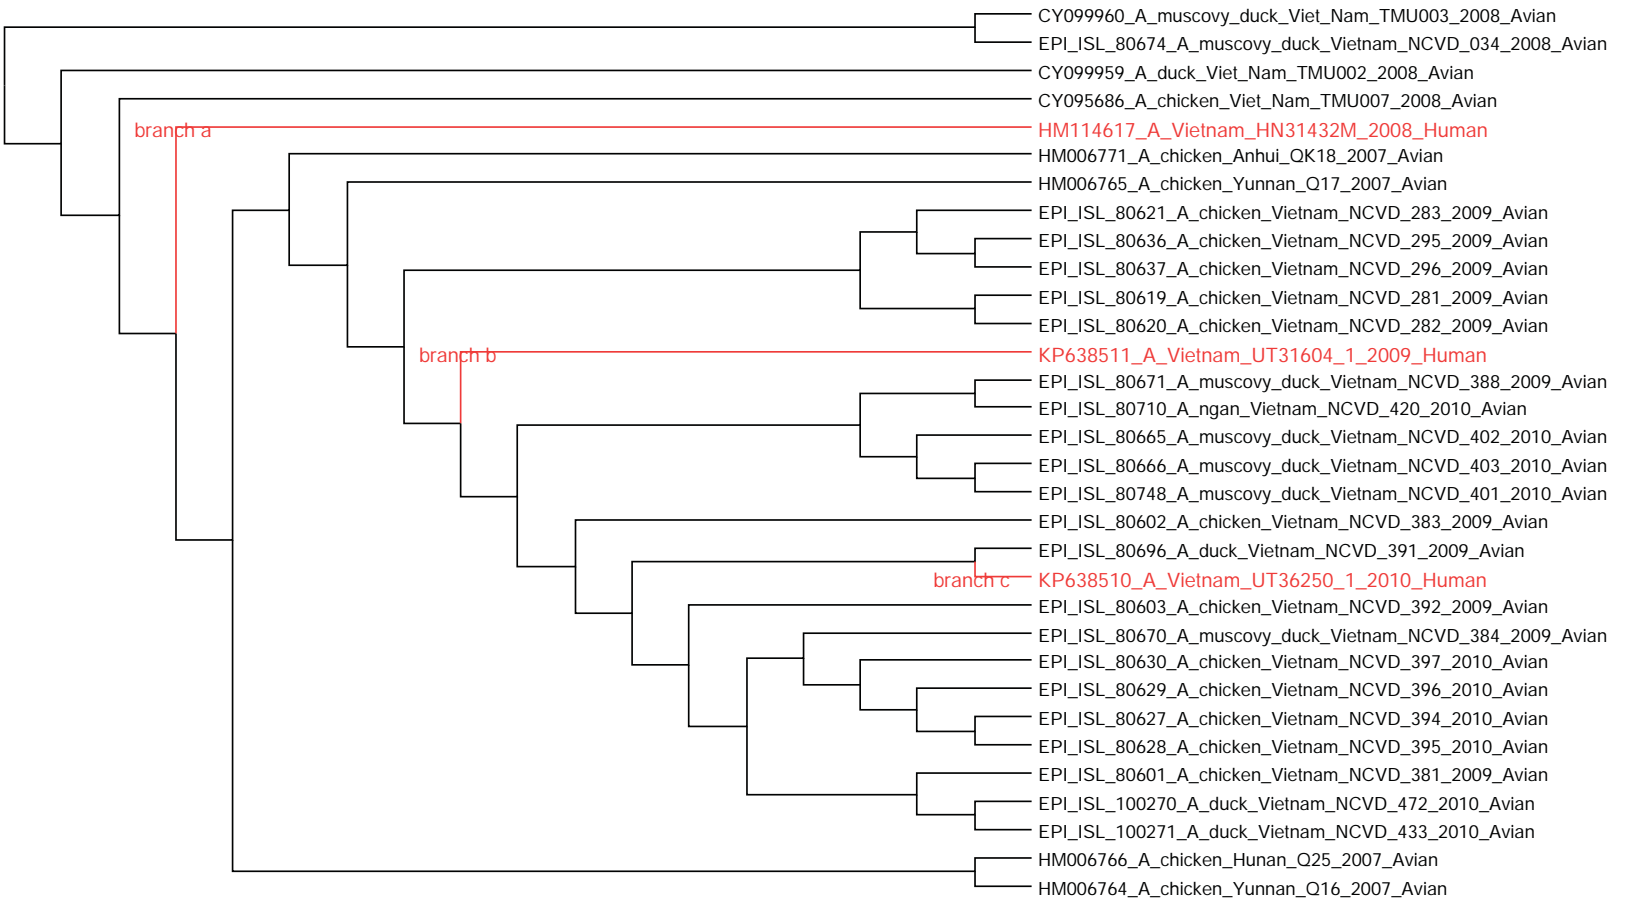

# HA-Group104

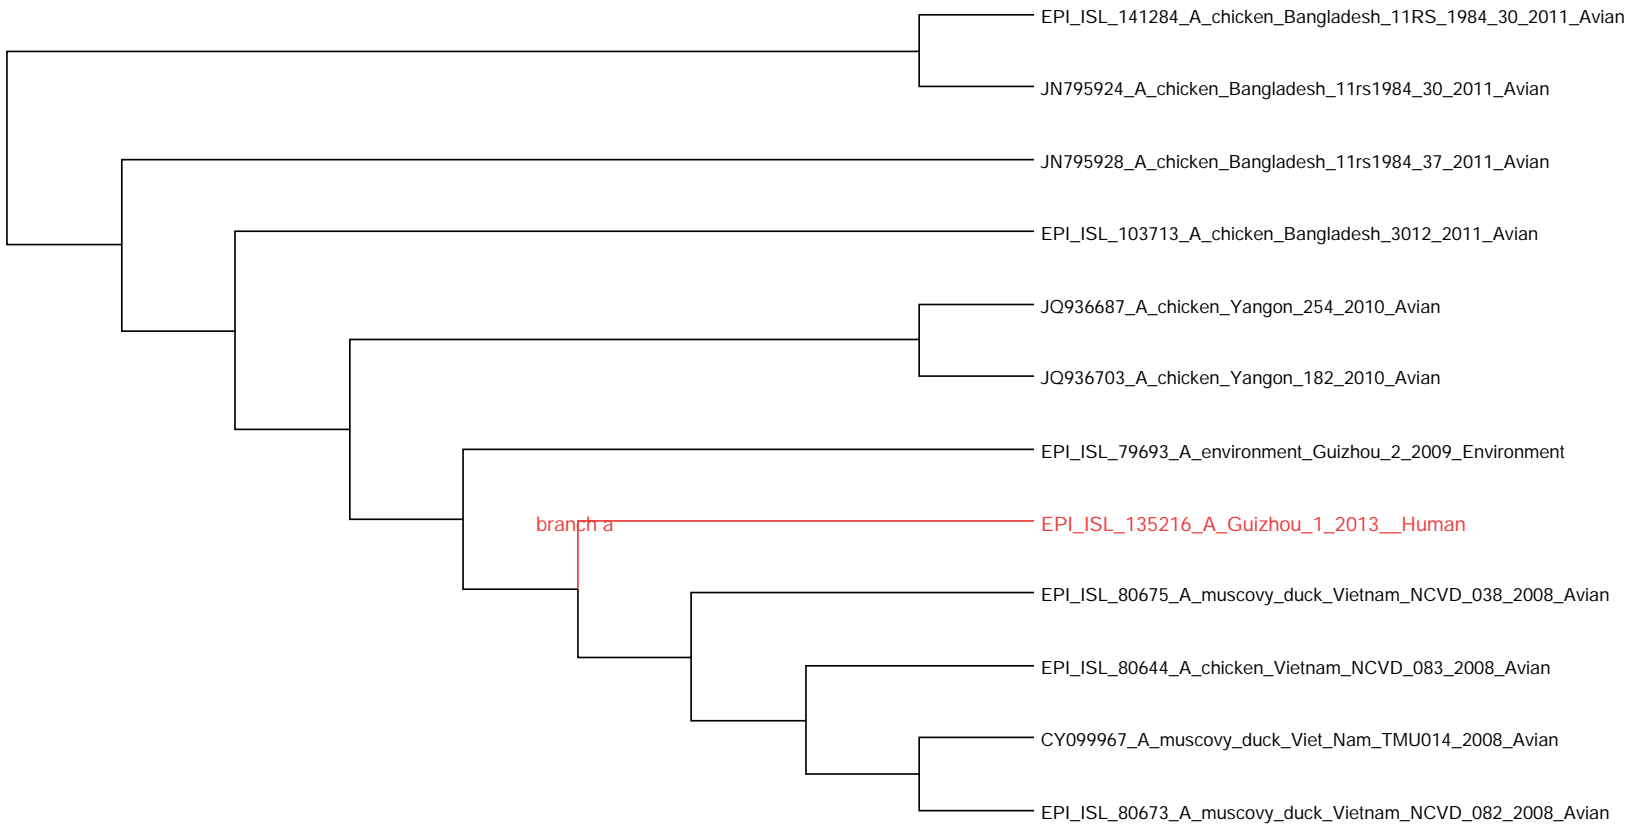



# HA-Group105

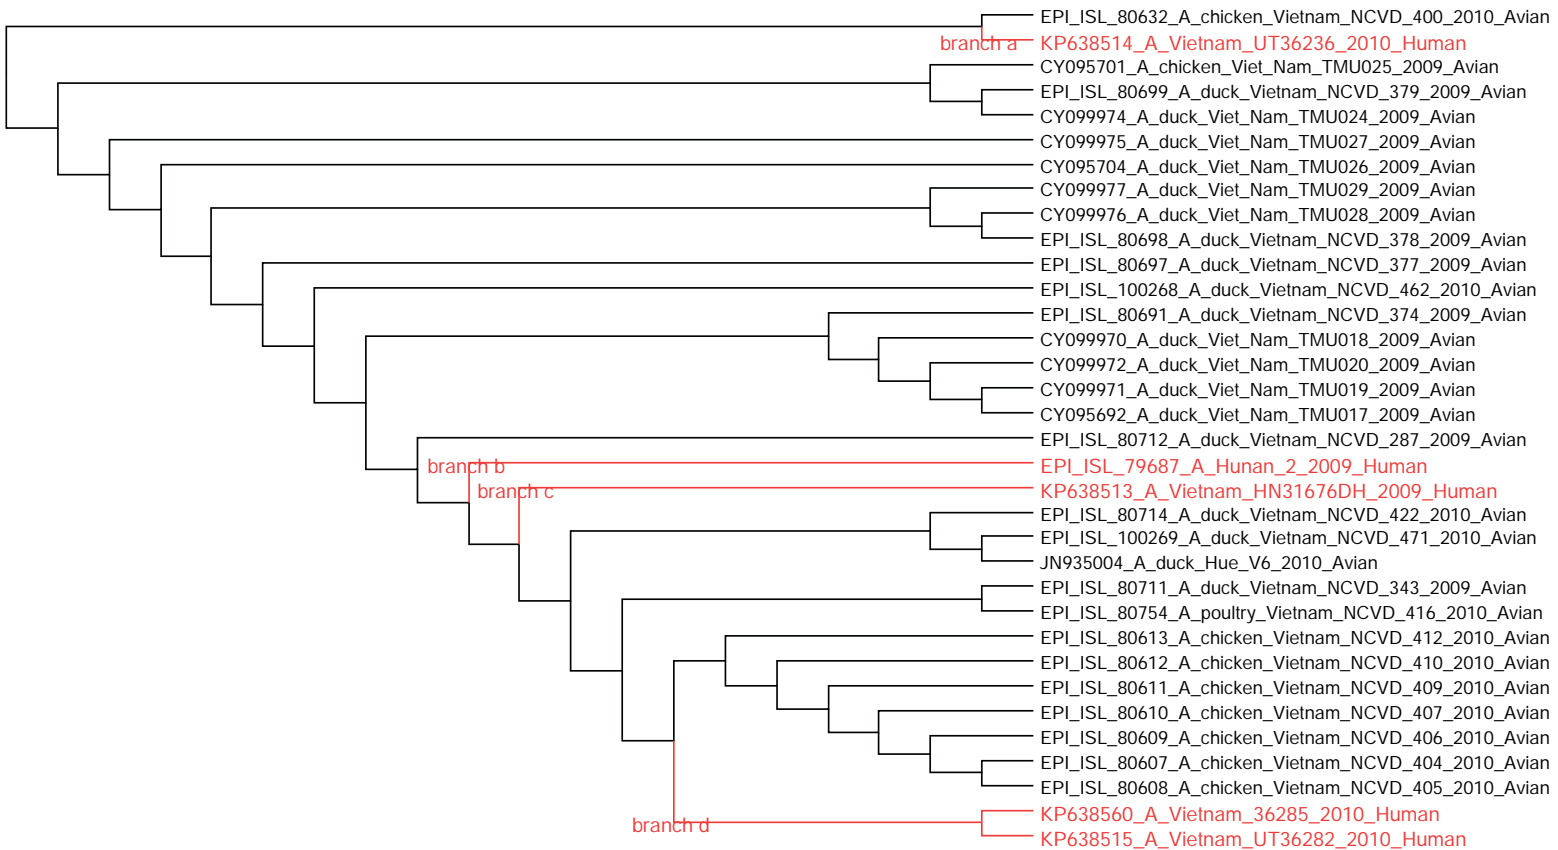

# HA-Group106

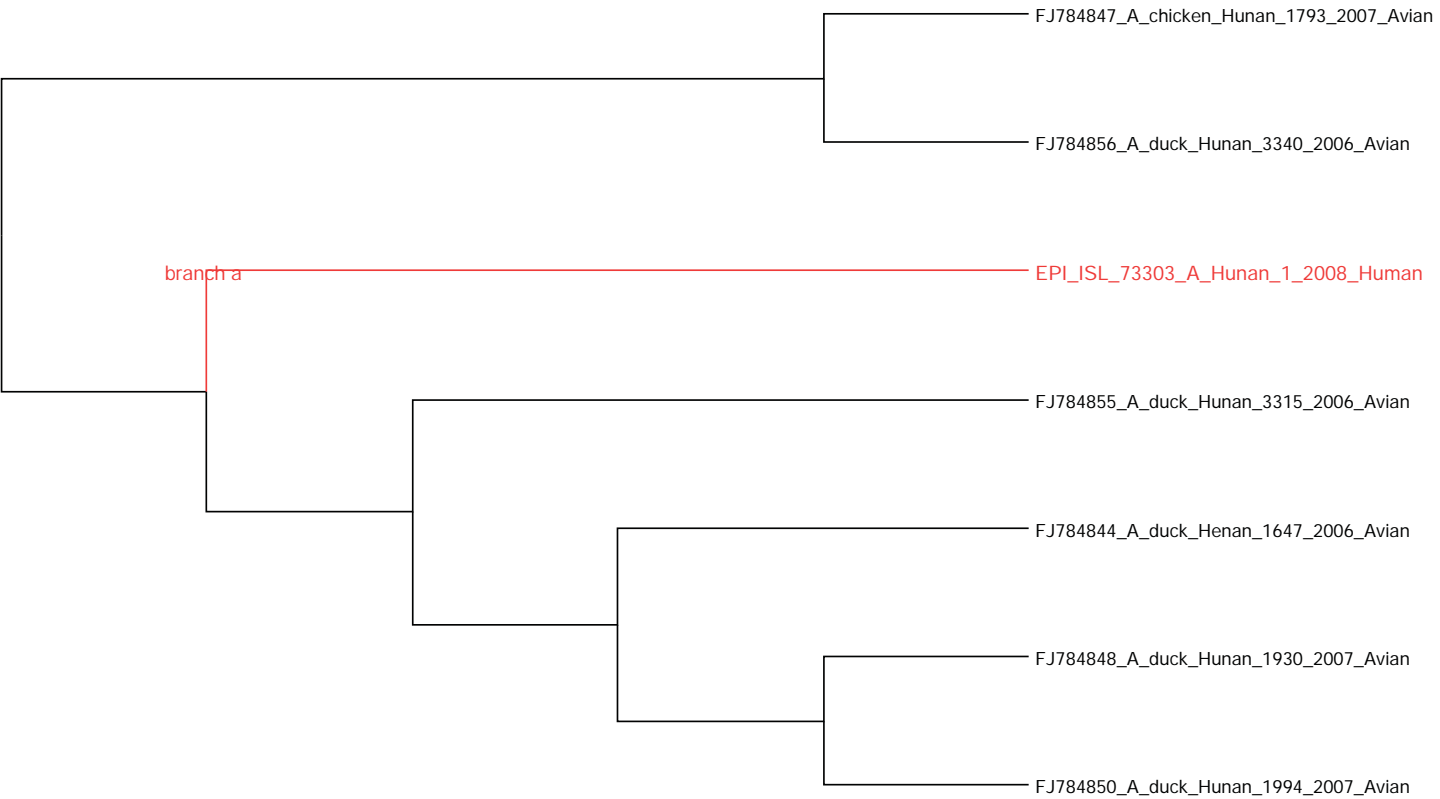

# HA-Group107

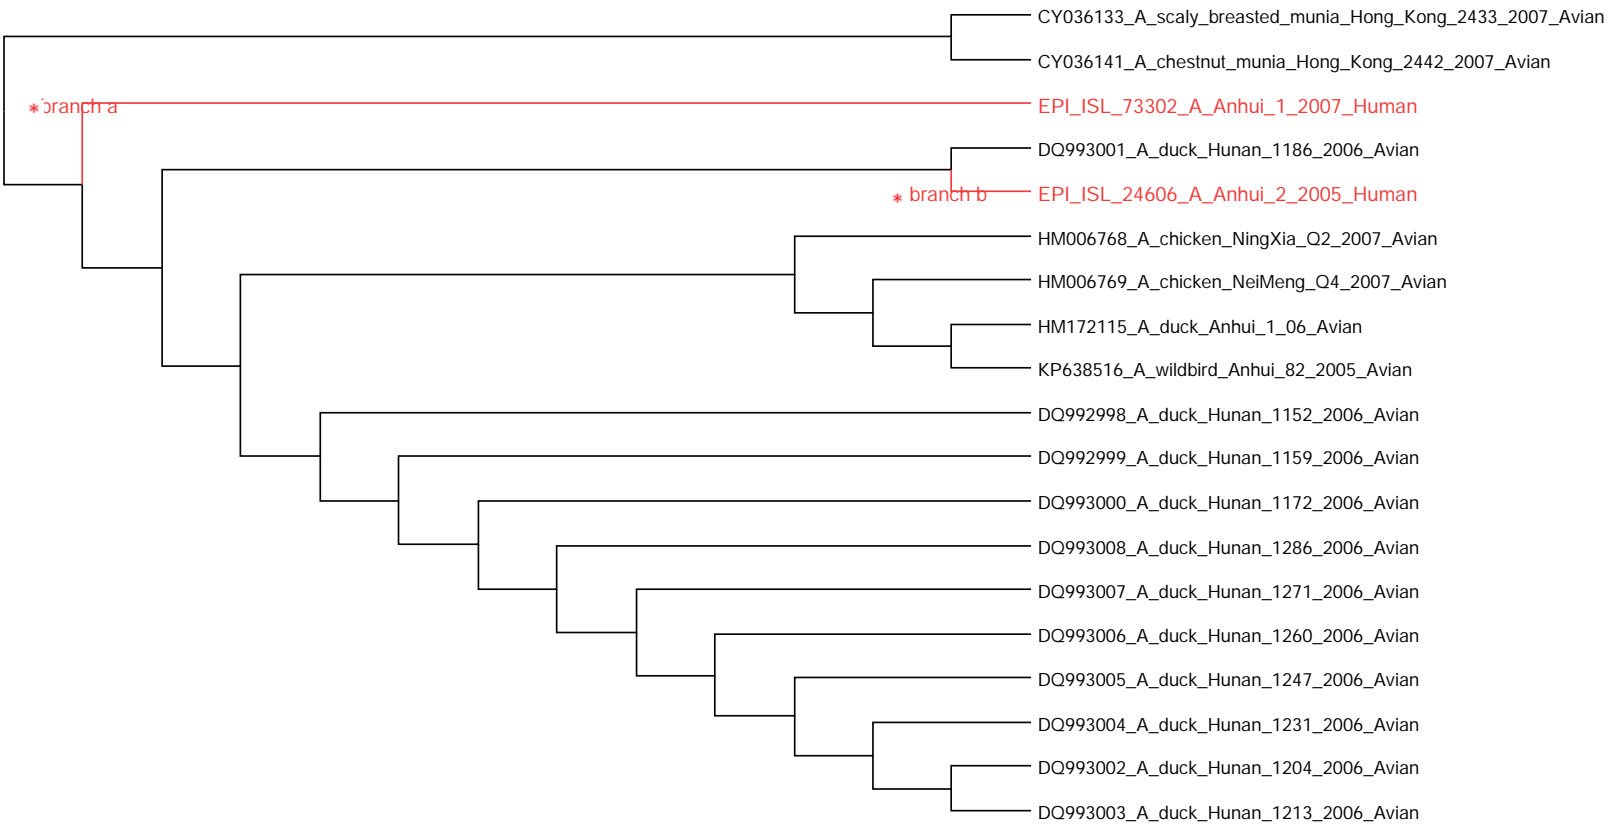

# HA-Group108

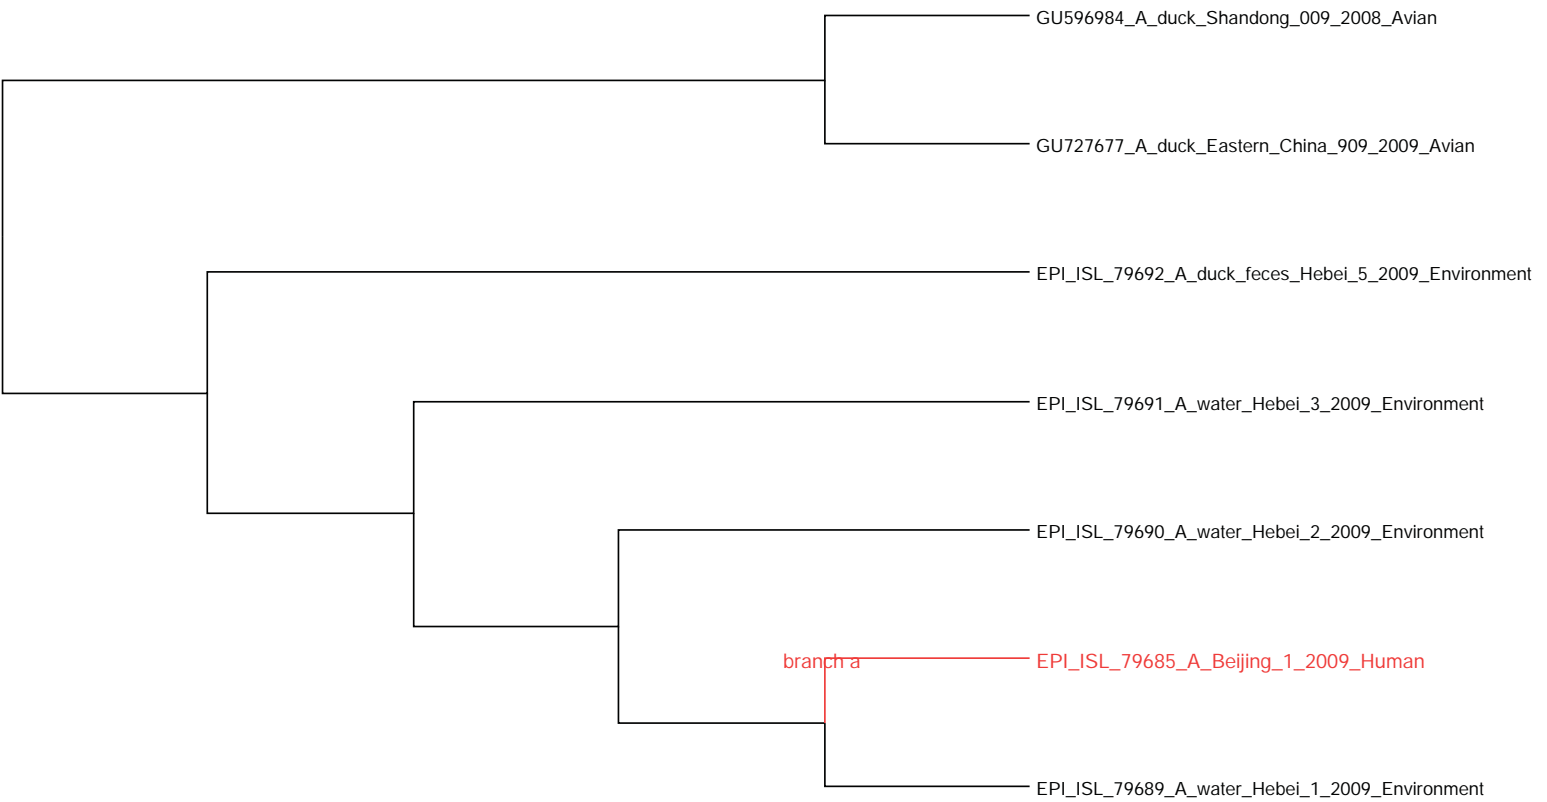

# HA-Group109

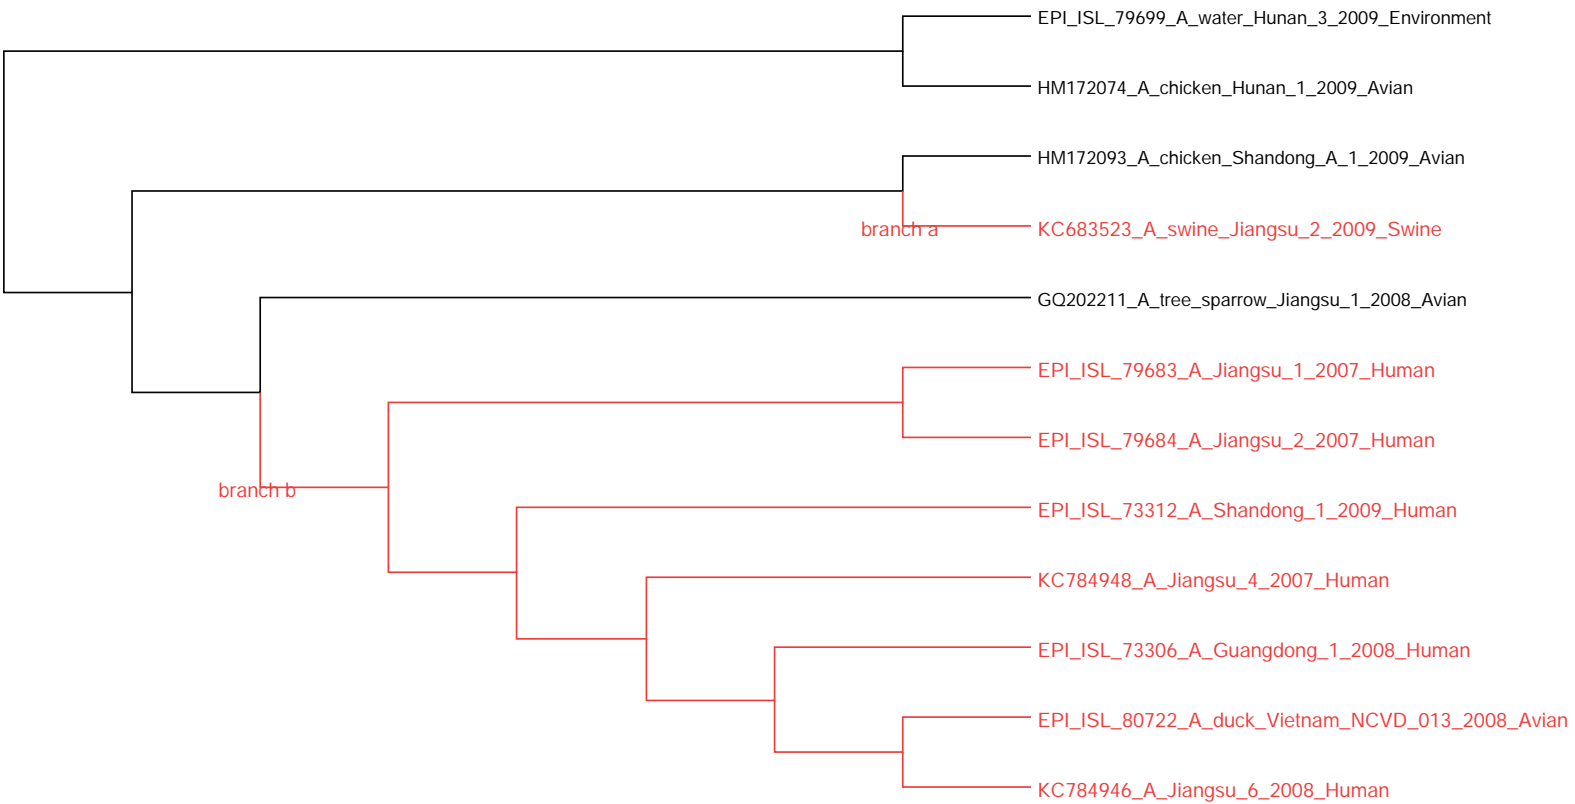

# HA-Group110

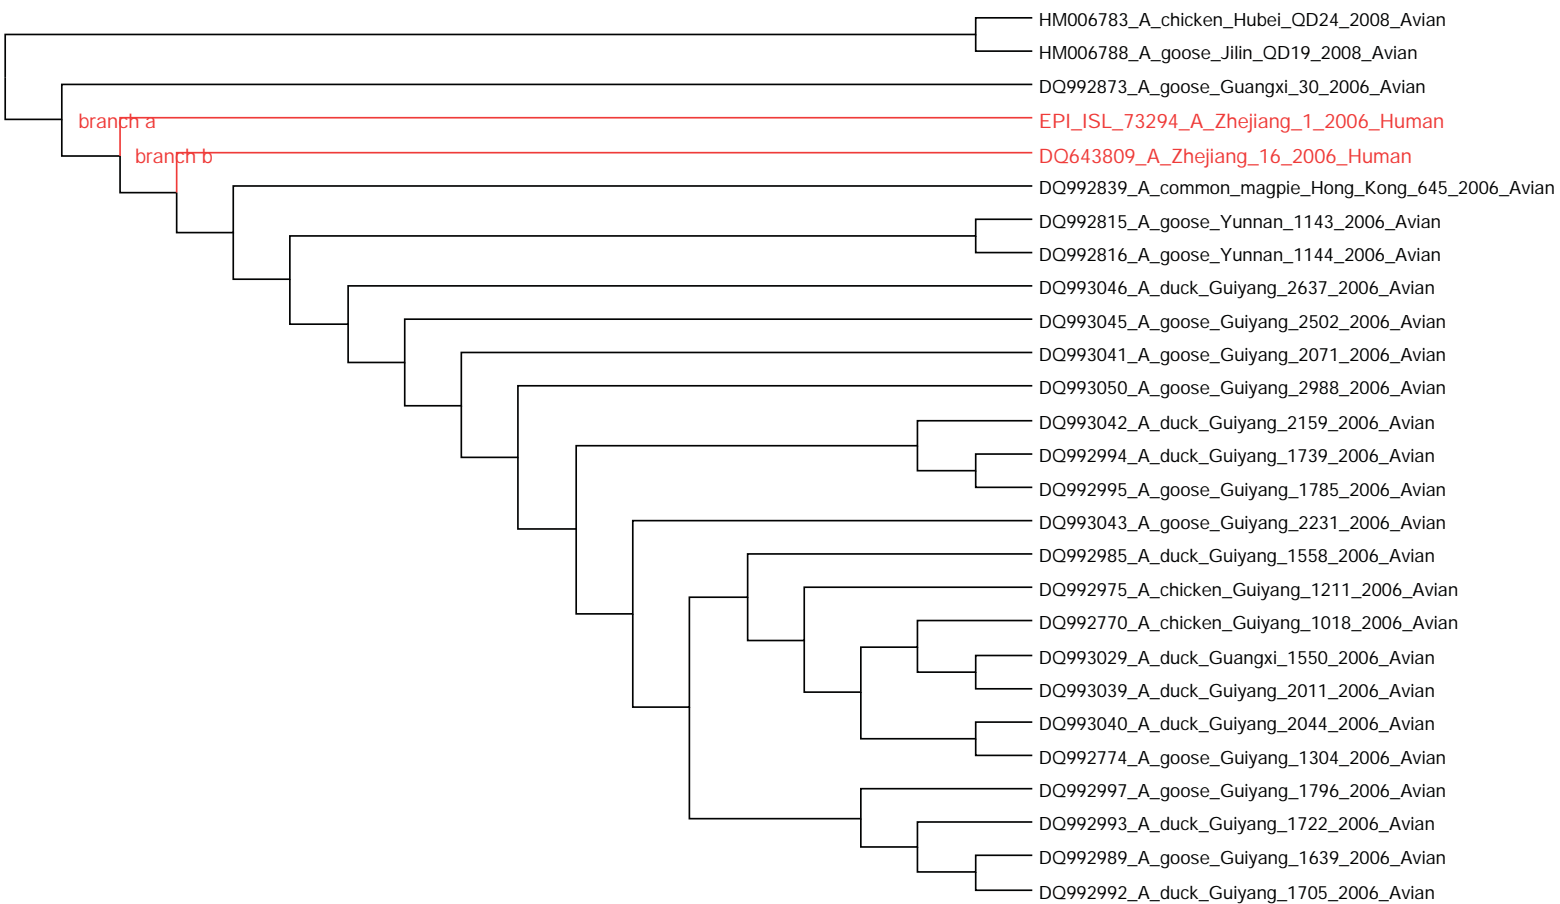

# HA-Group111

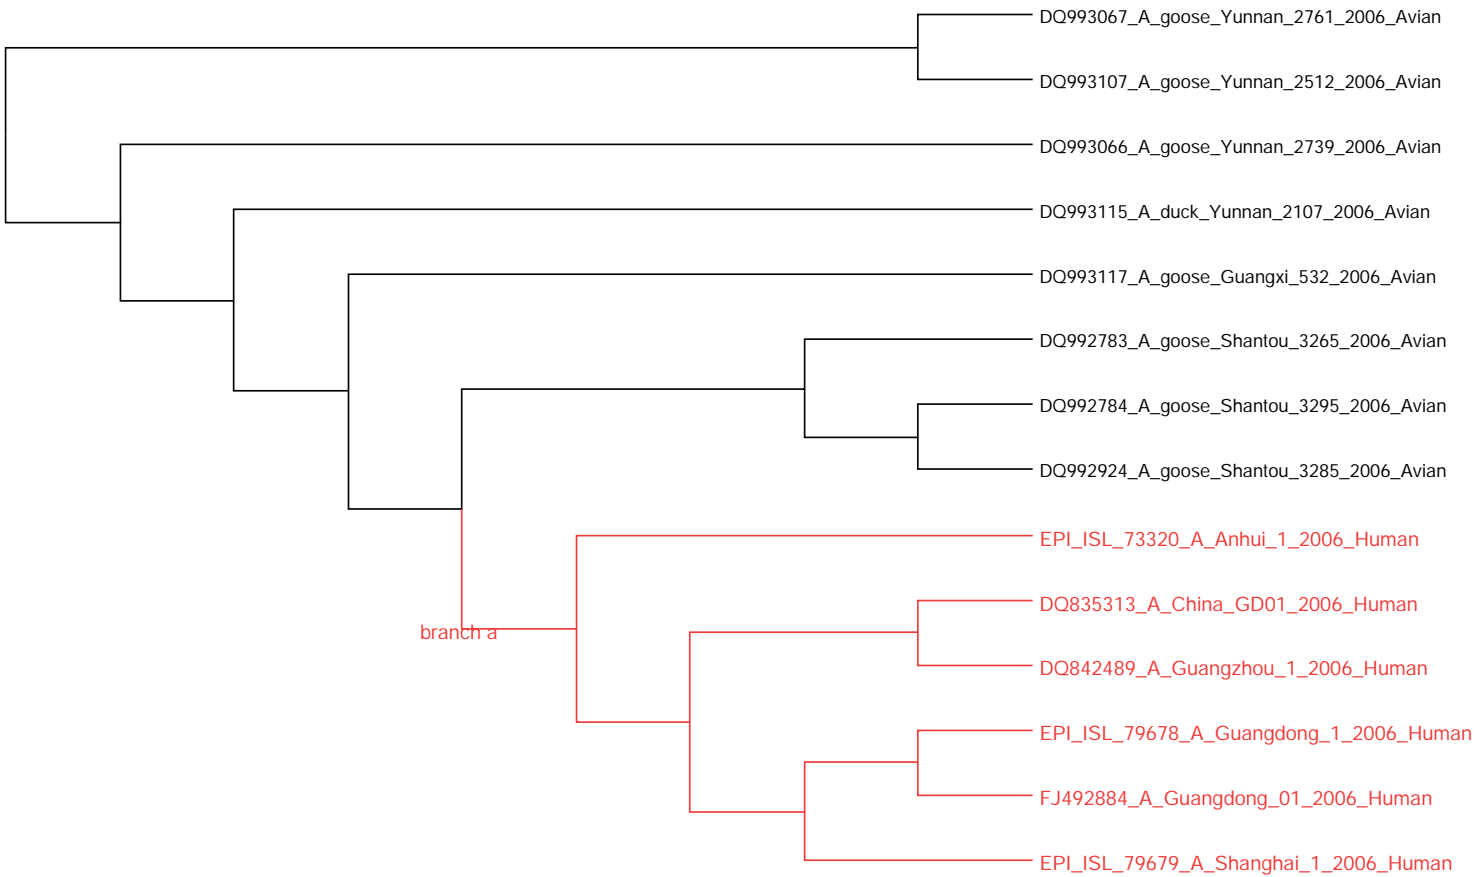

# HA-Group112

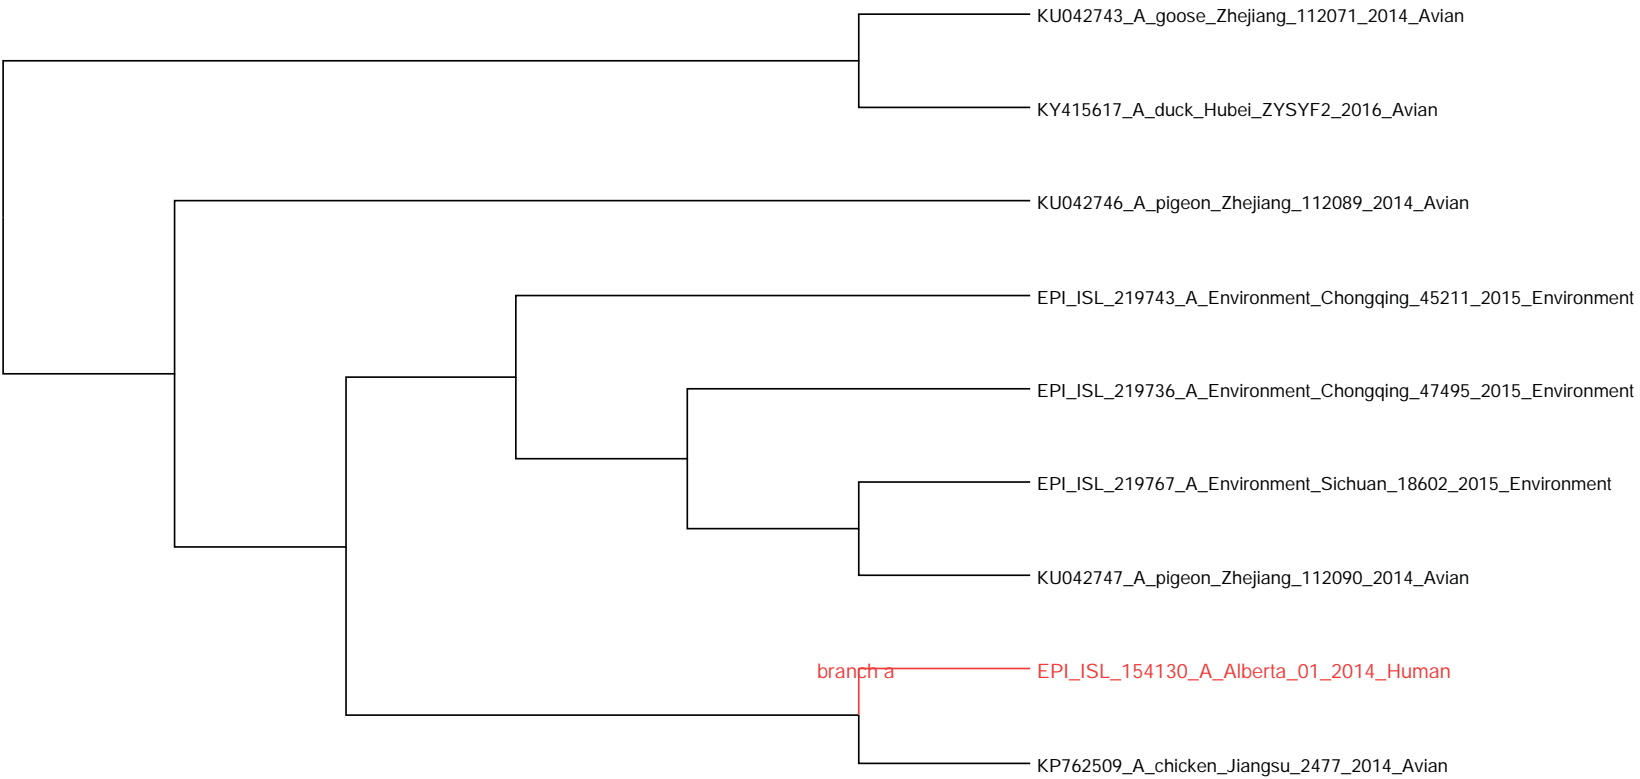



# HA-Group113

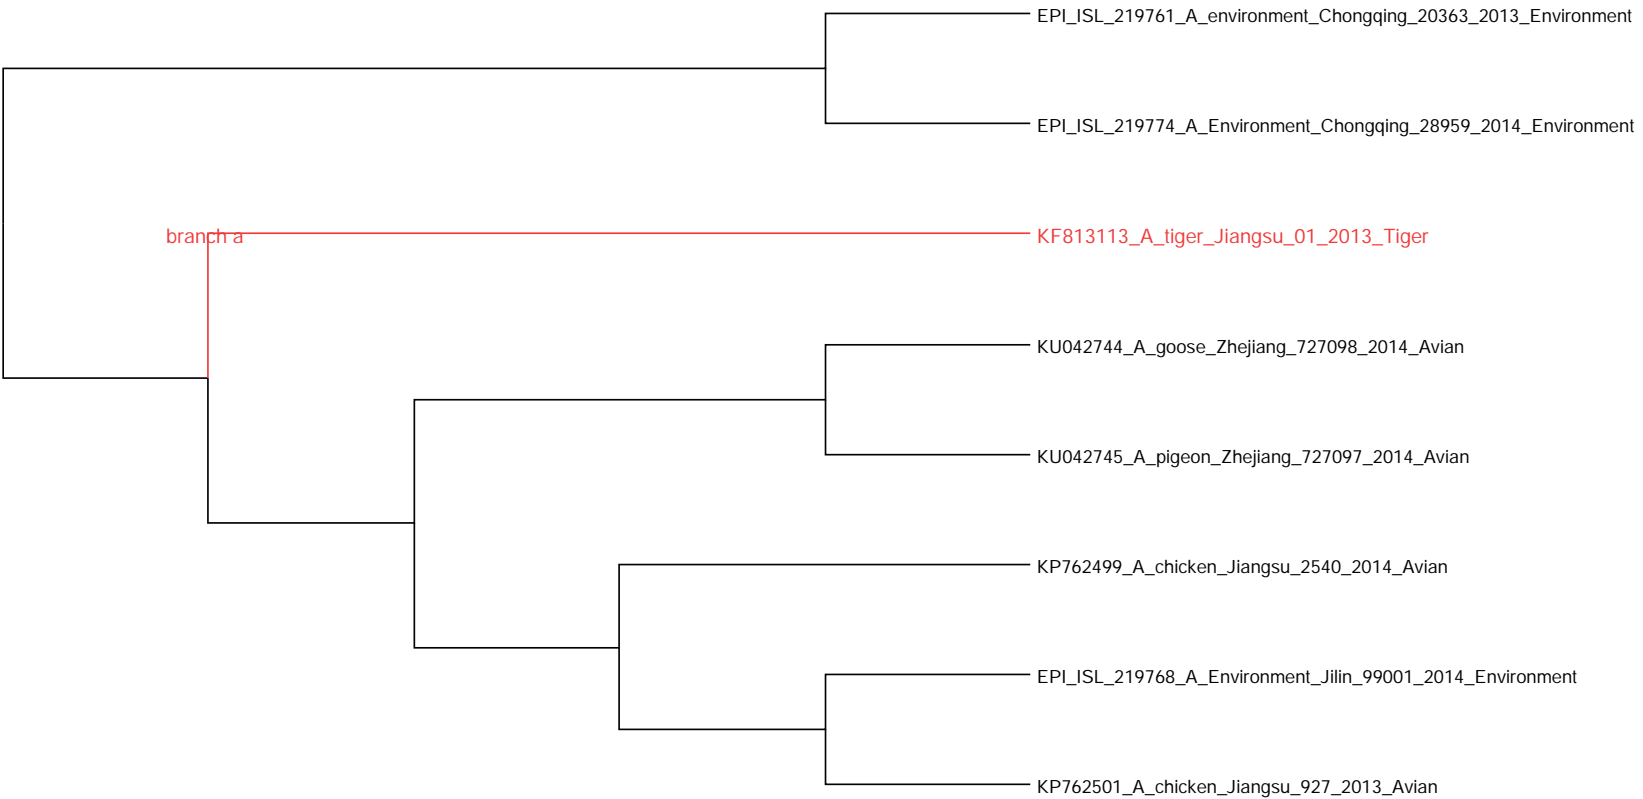

# HA-Group114

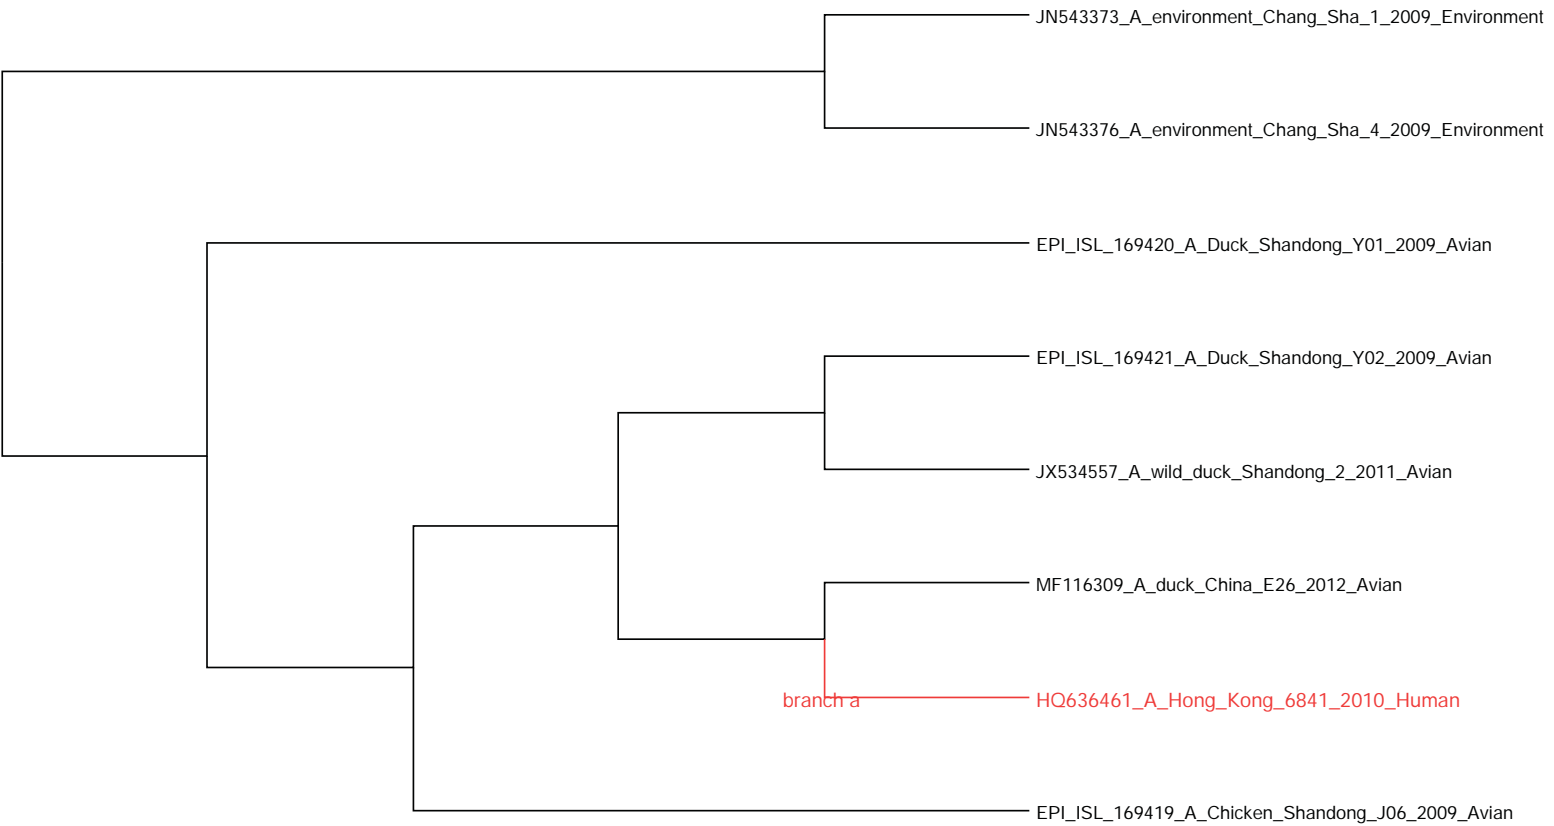

# HA-Group115

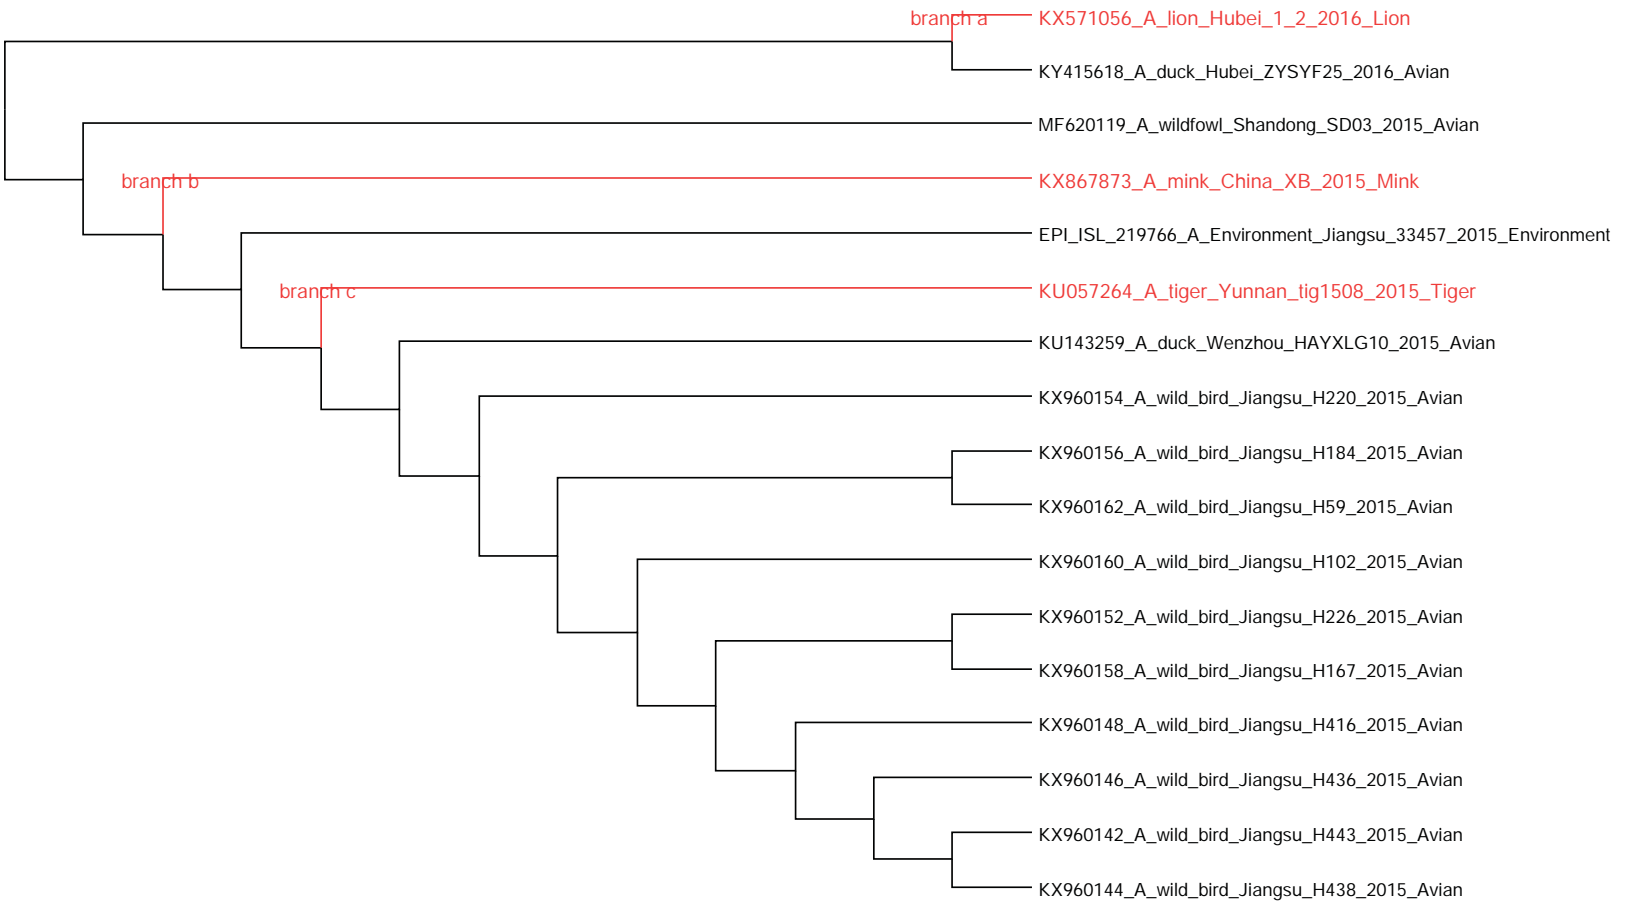

# HA-Group116

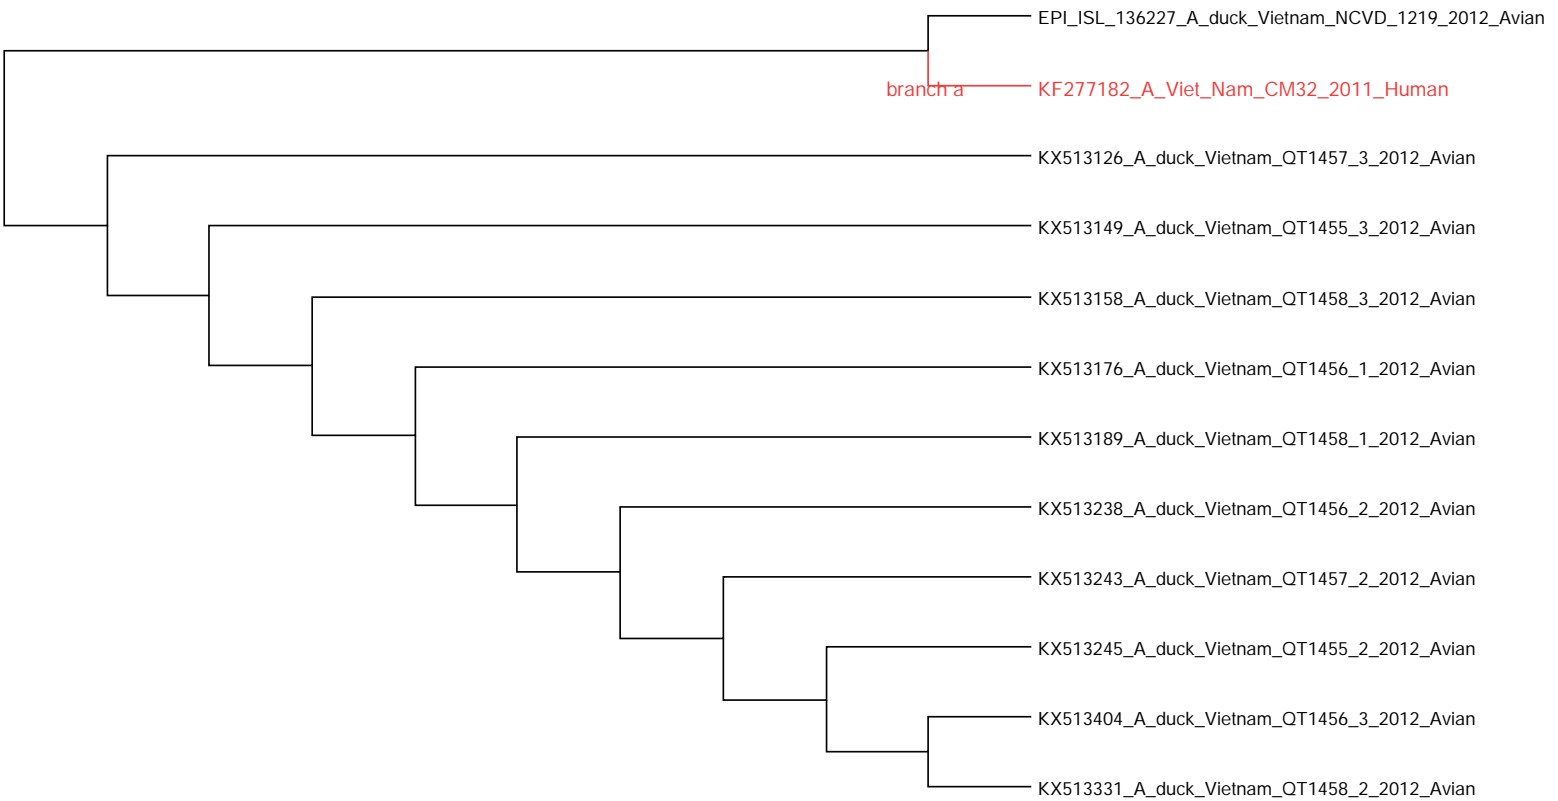

# HA-Group117

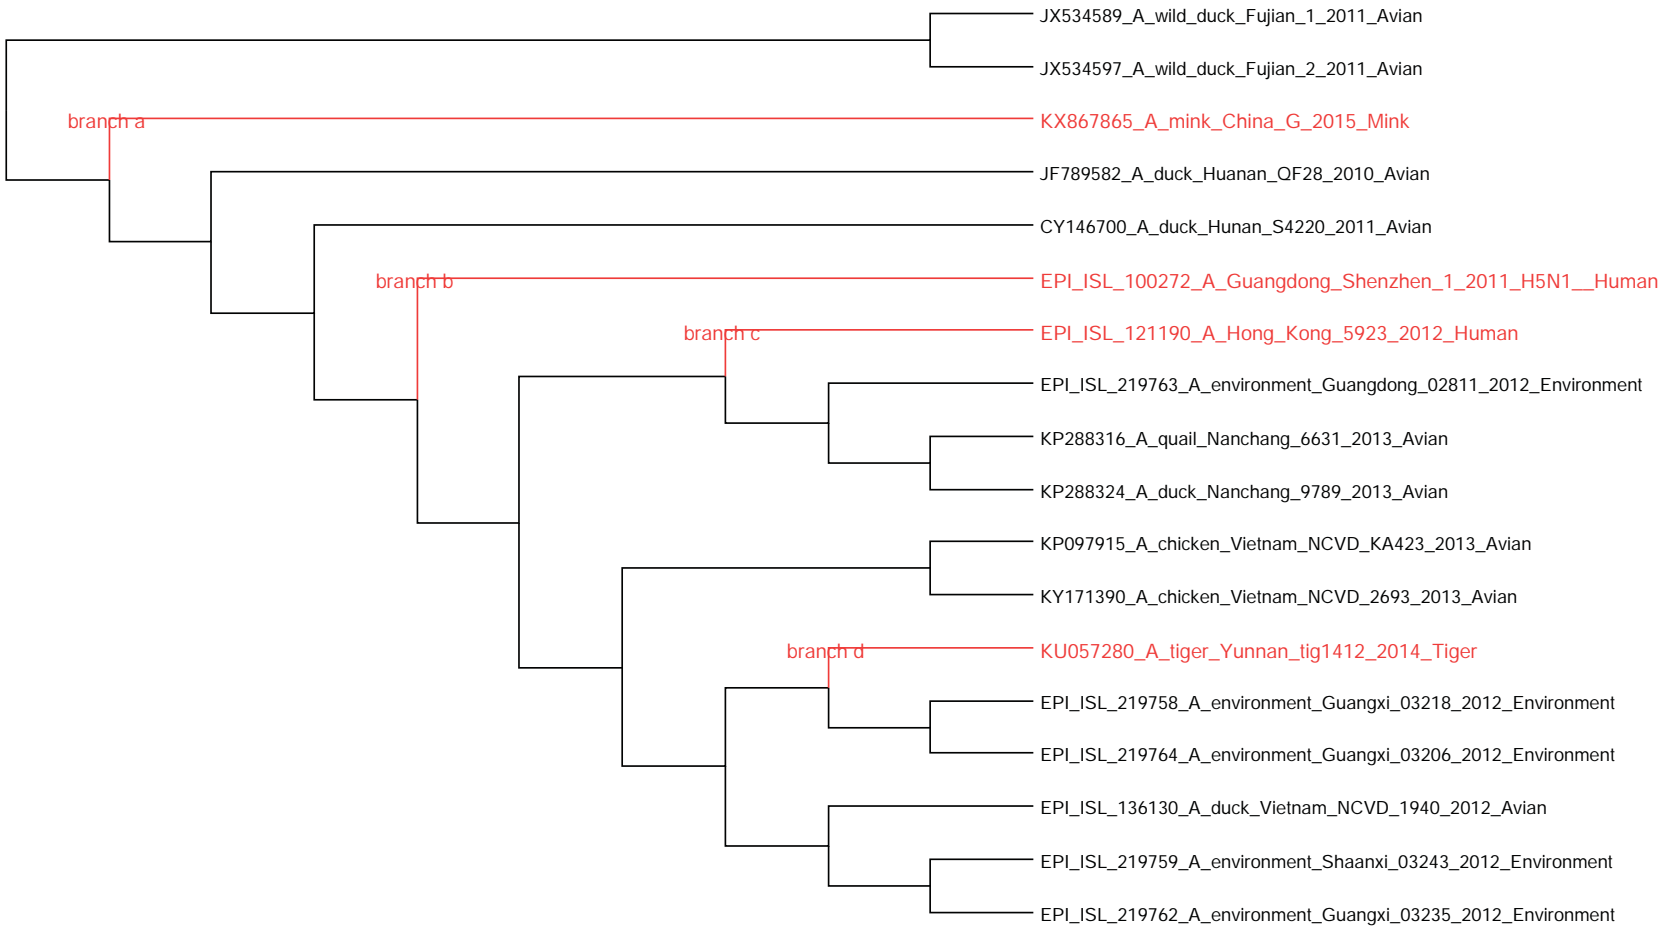

# HA-Group 18

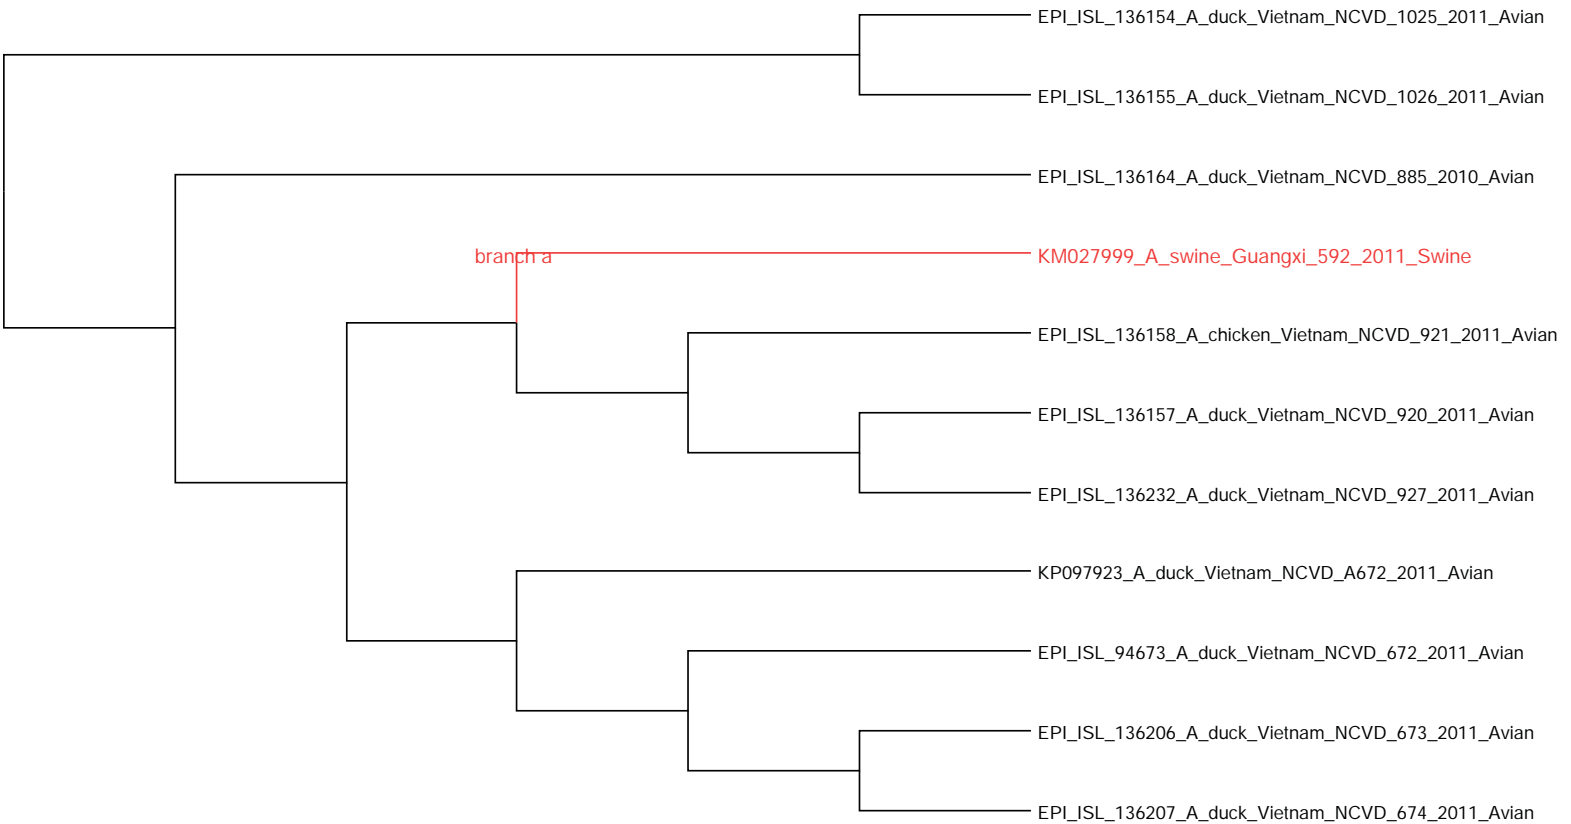

# HA-Group19

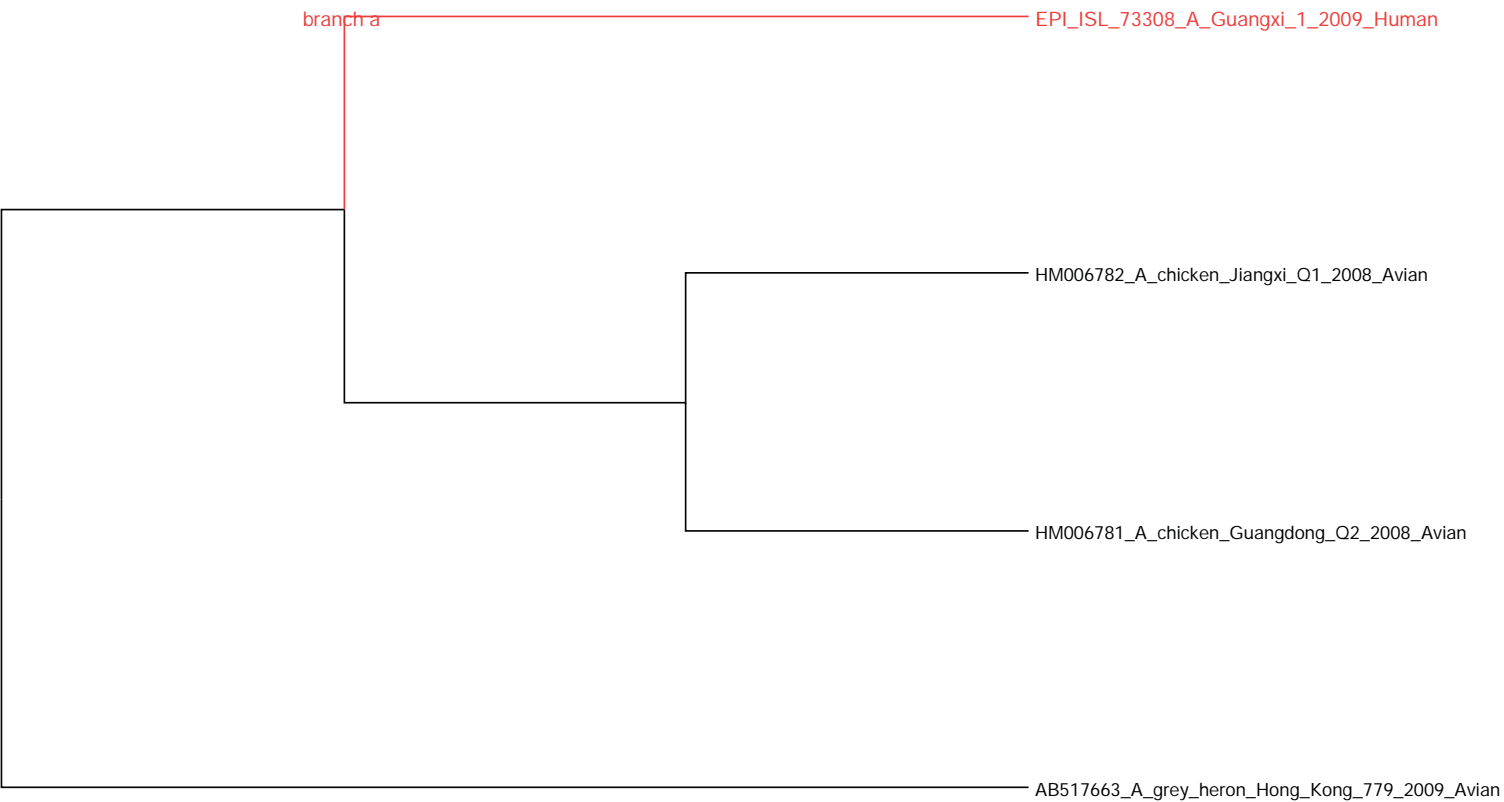

# HA-Group120

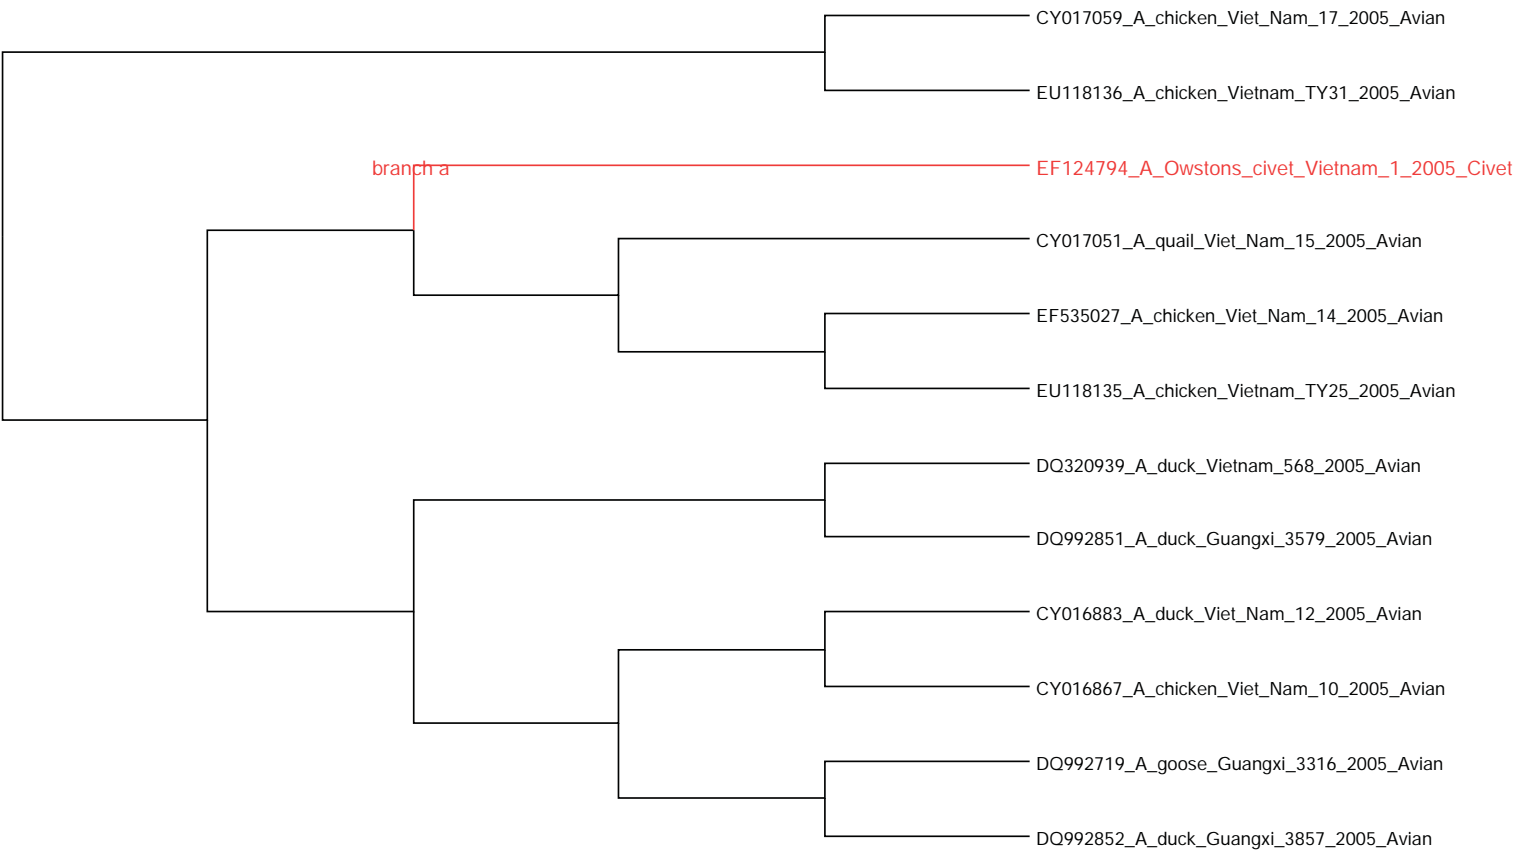



# HA-Group121

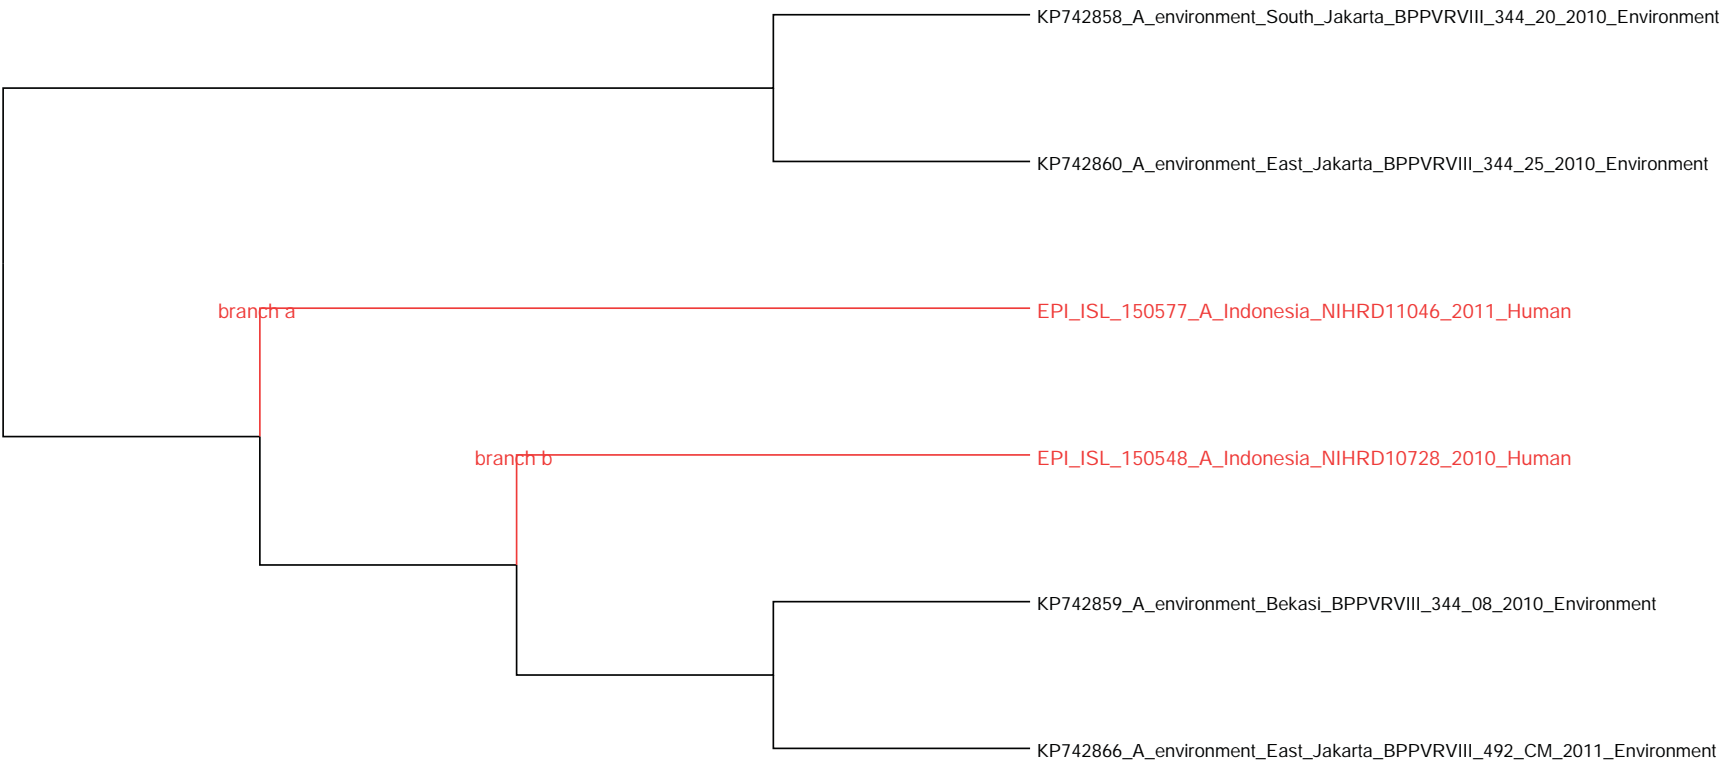

# HA-Group122

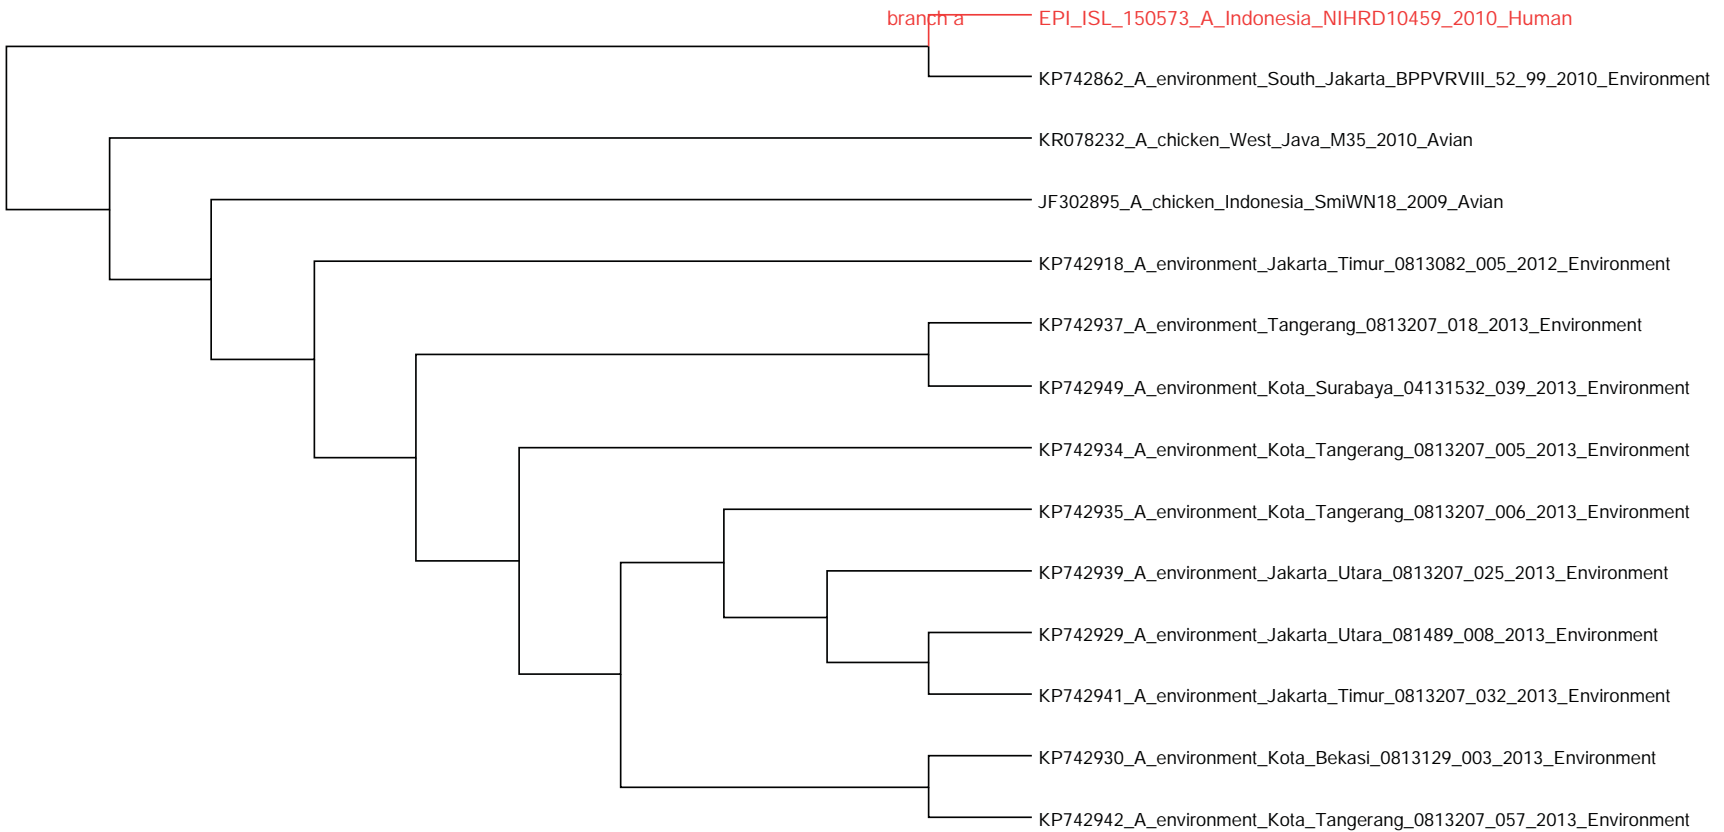

# HA-Group123

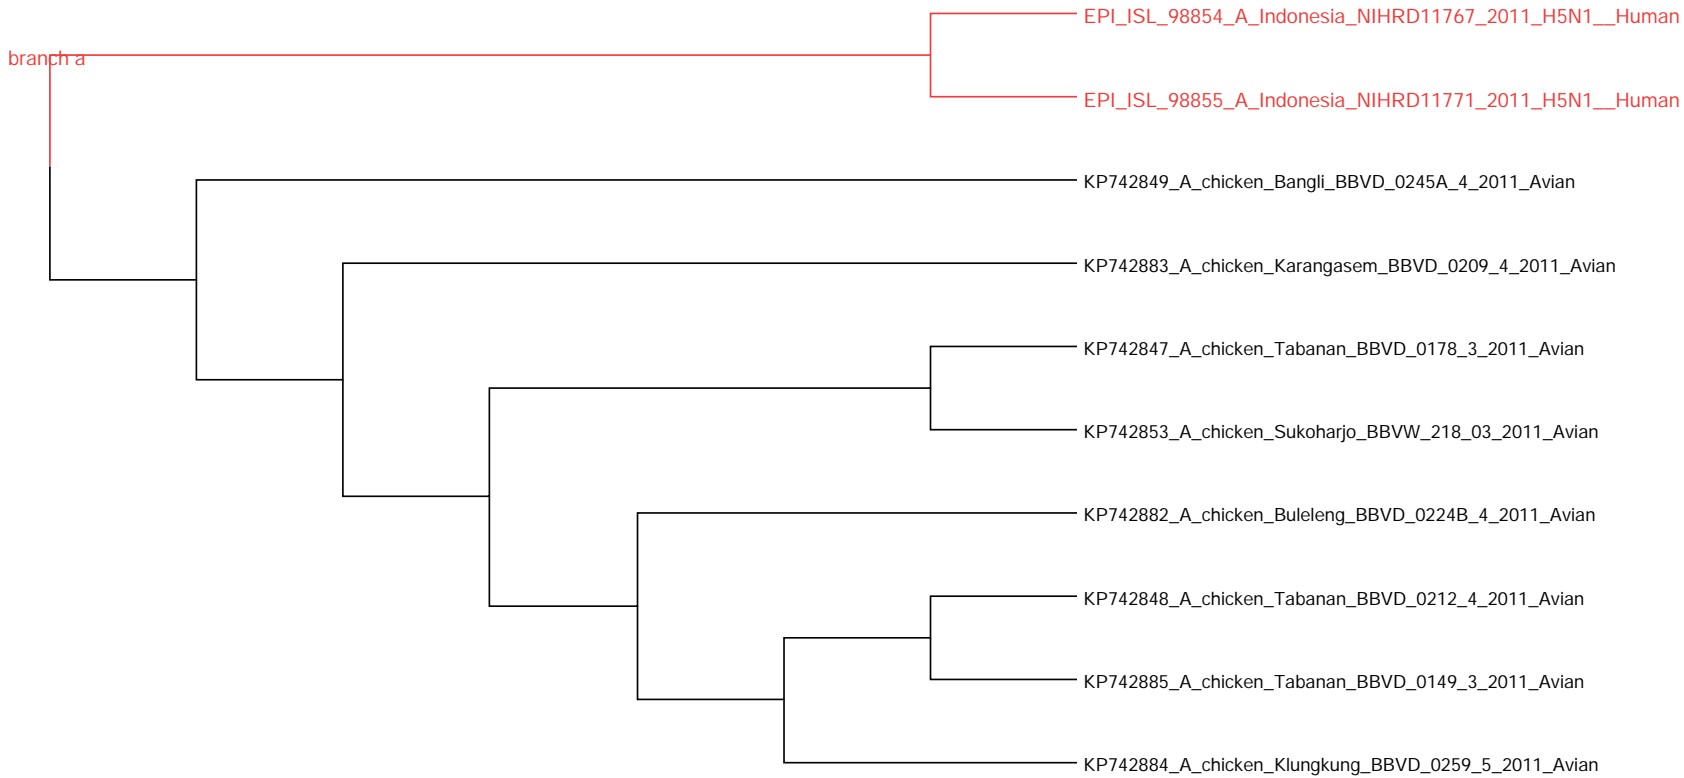

# HA-Group124

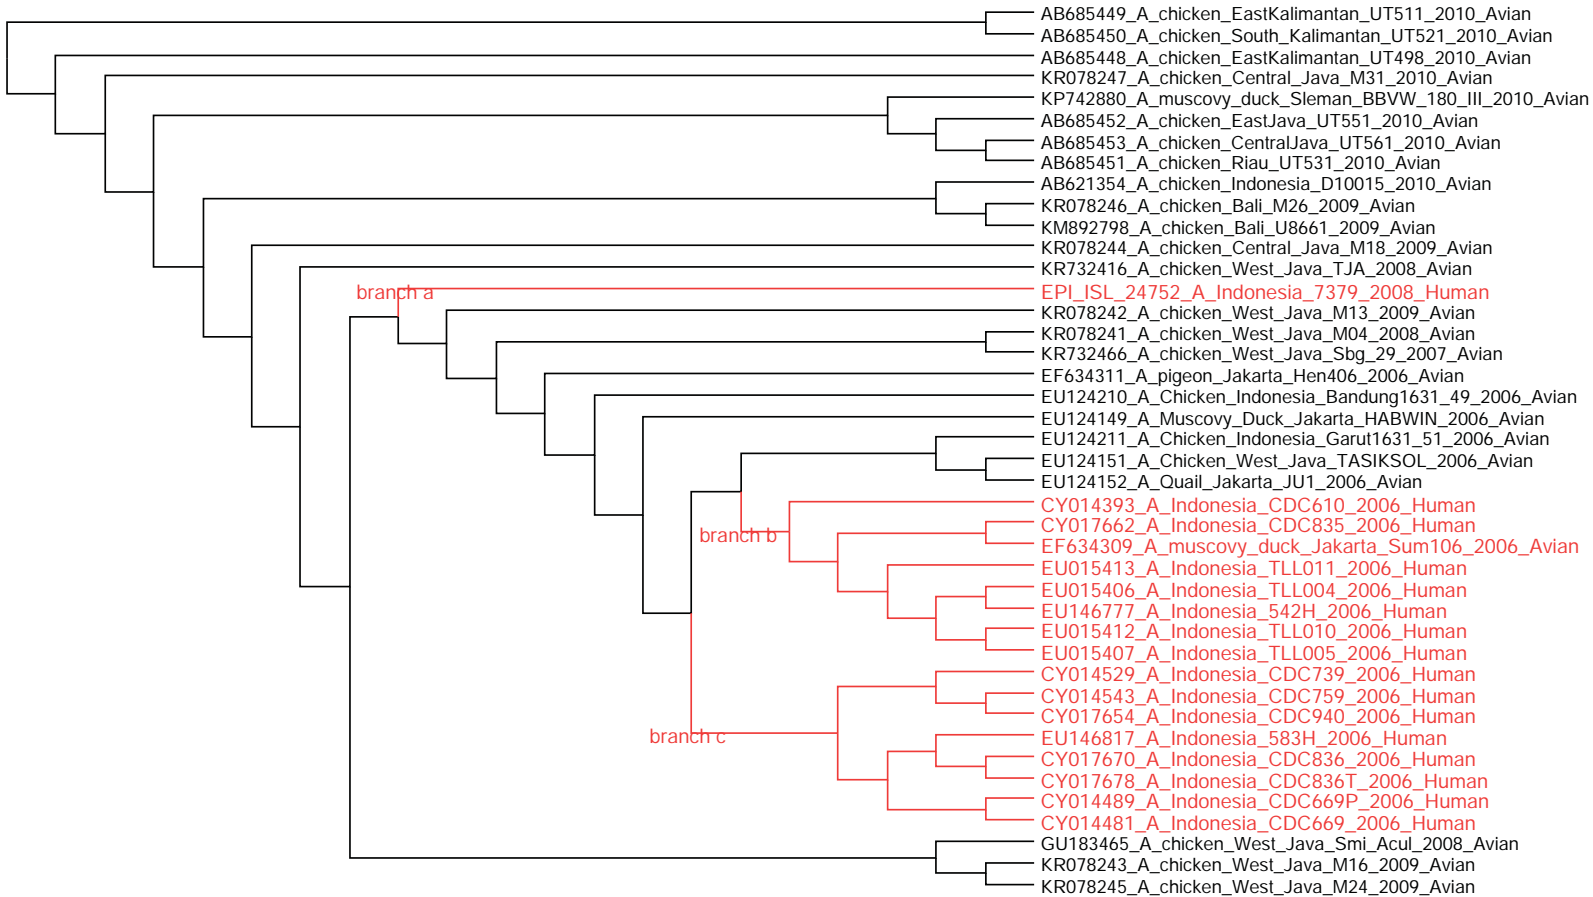

# HA-Group125

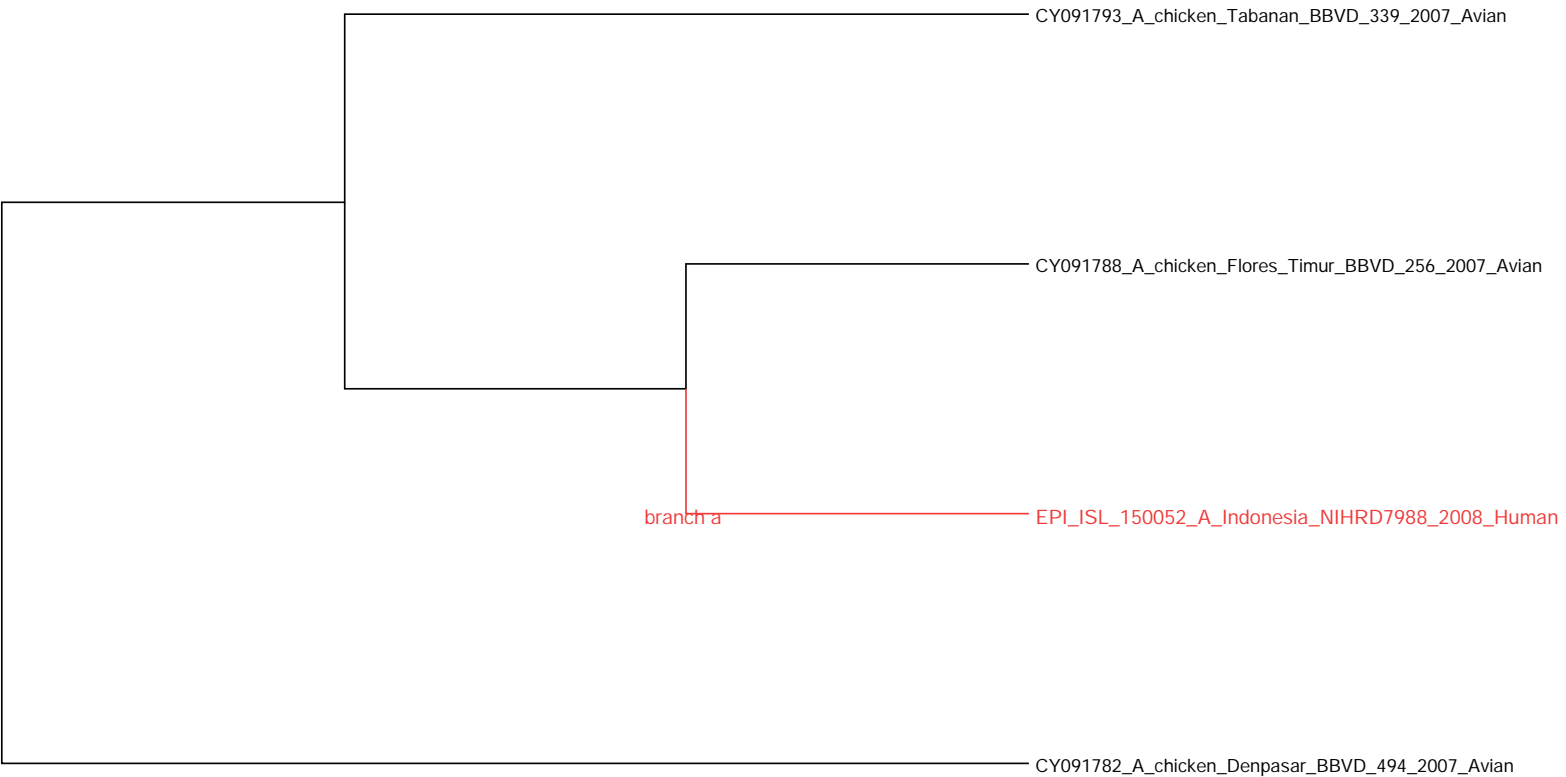

# HA-Group 126

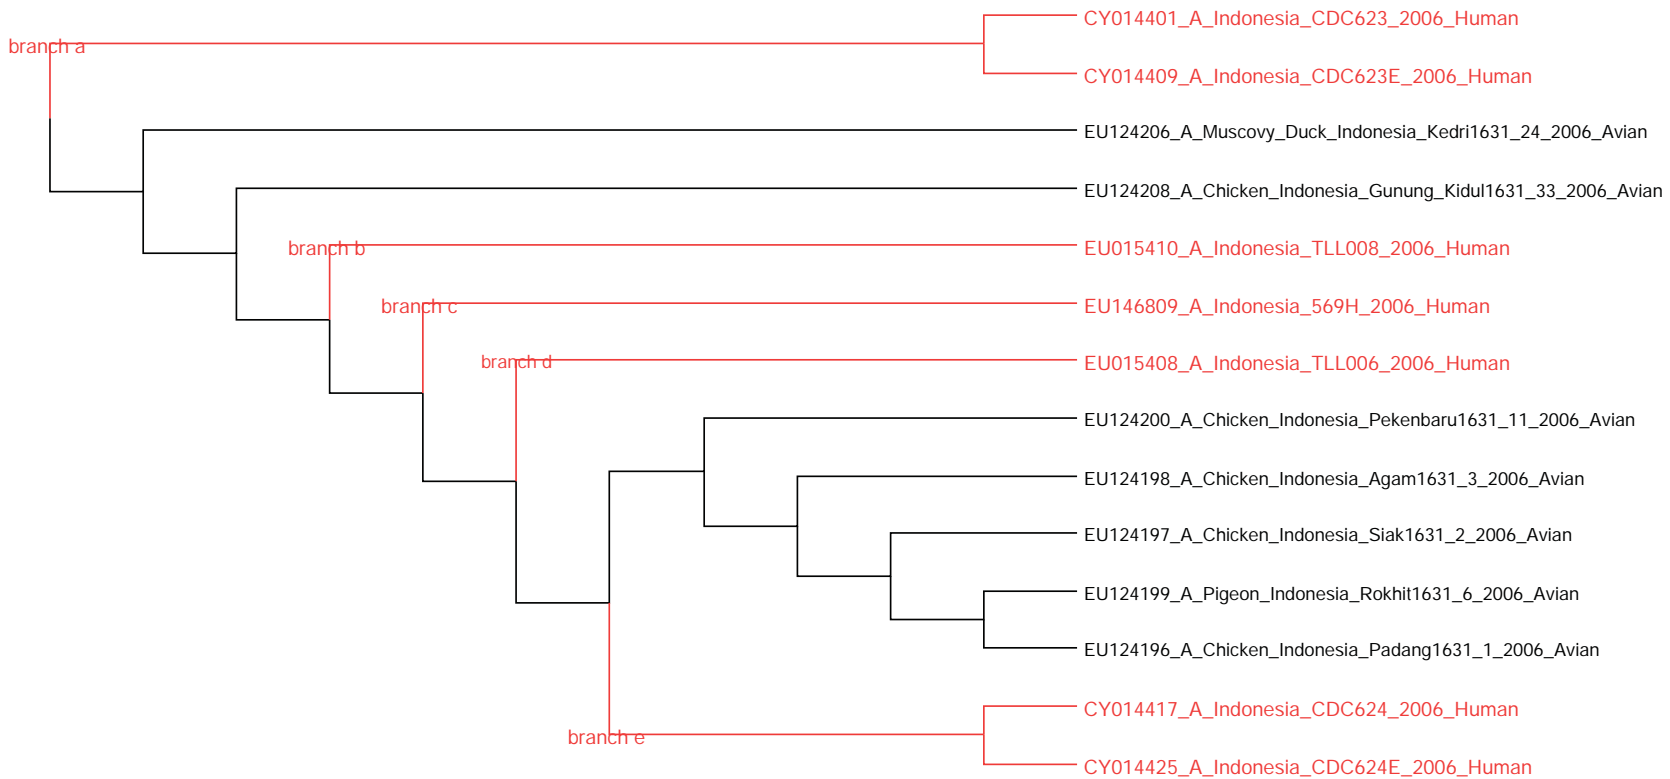

# HA-Group127

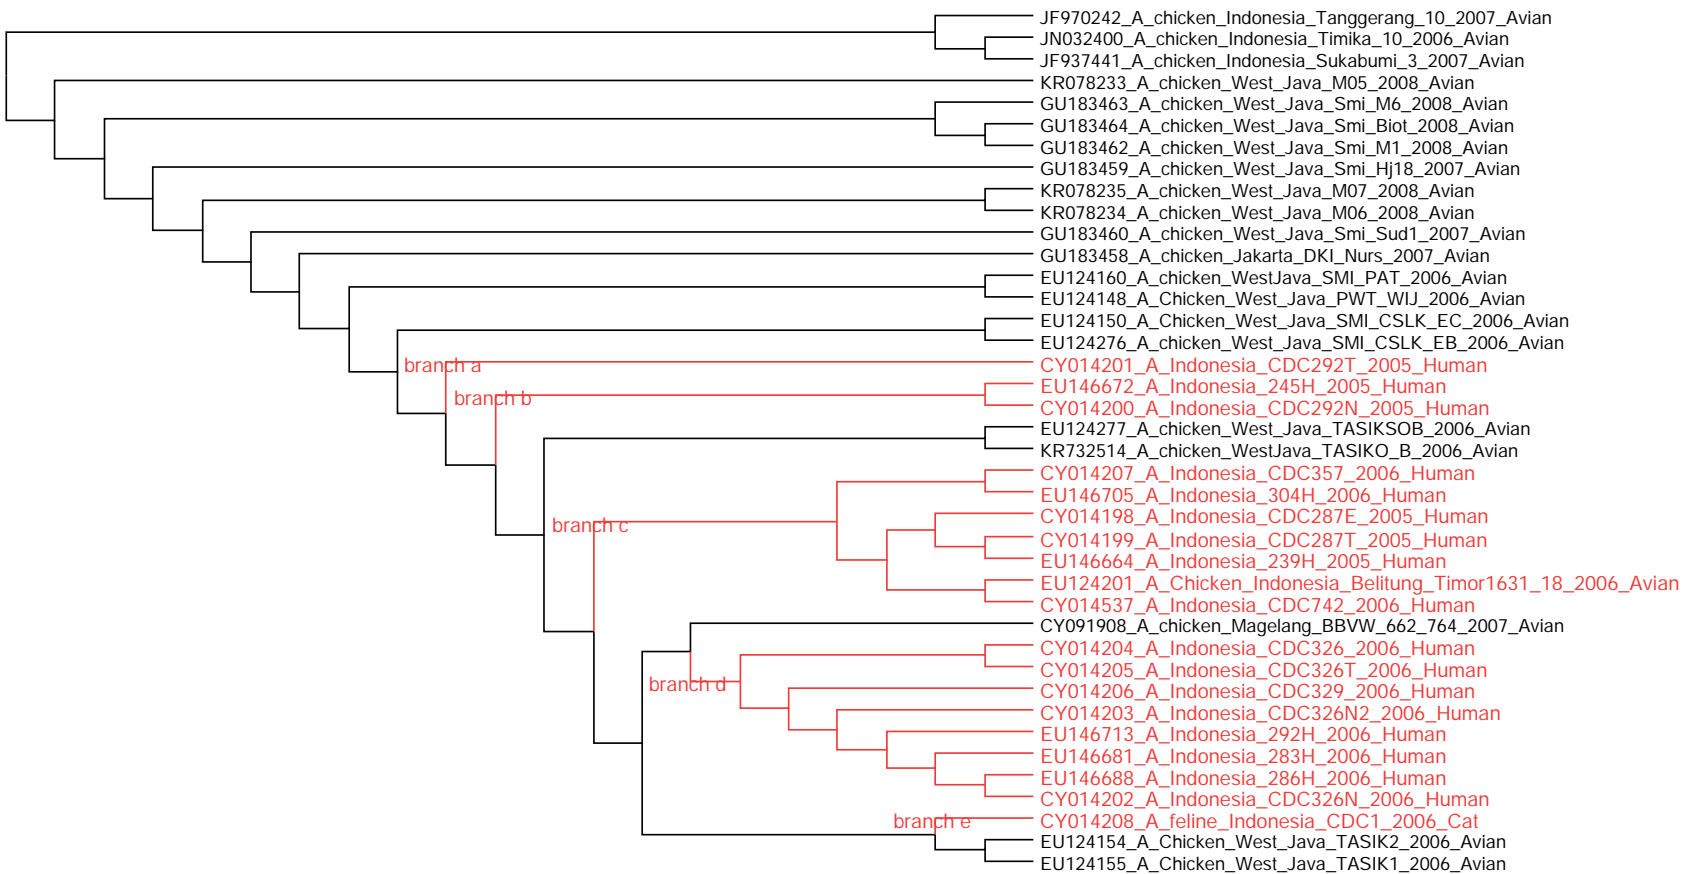

# HA-Group128

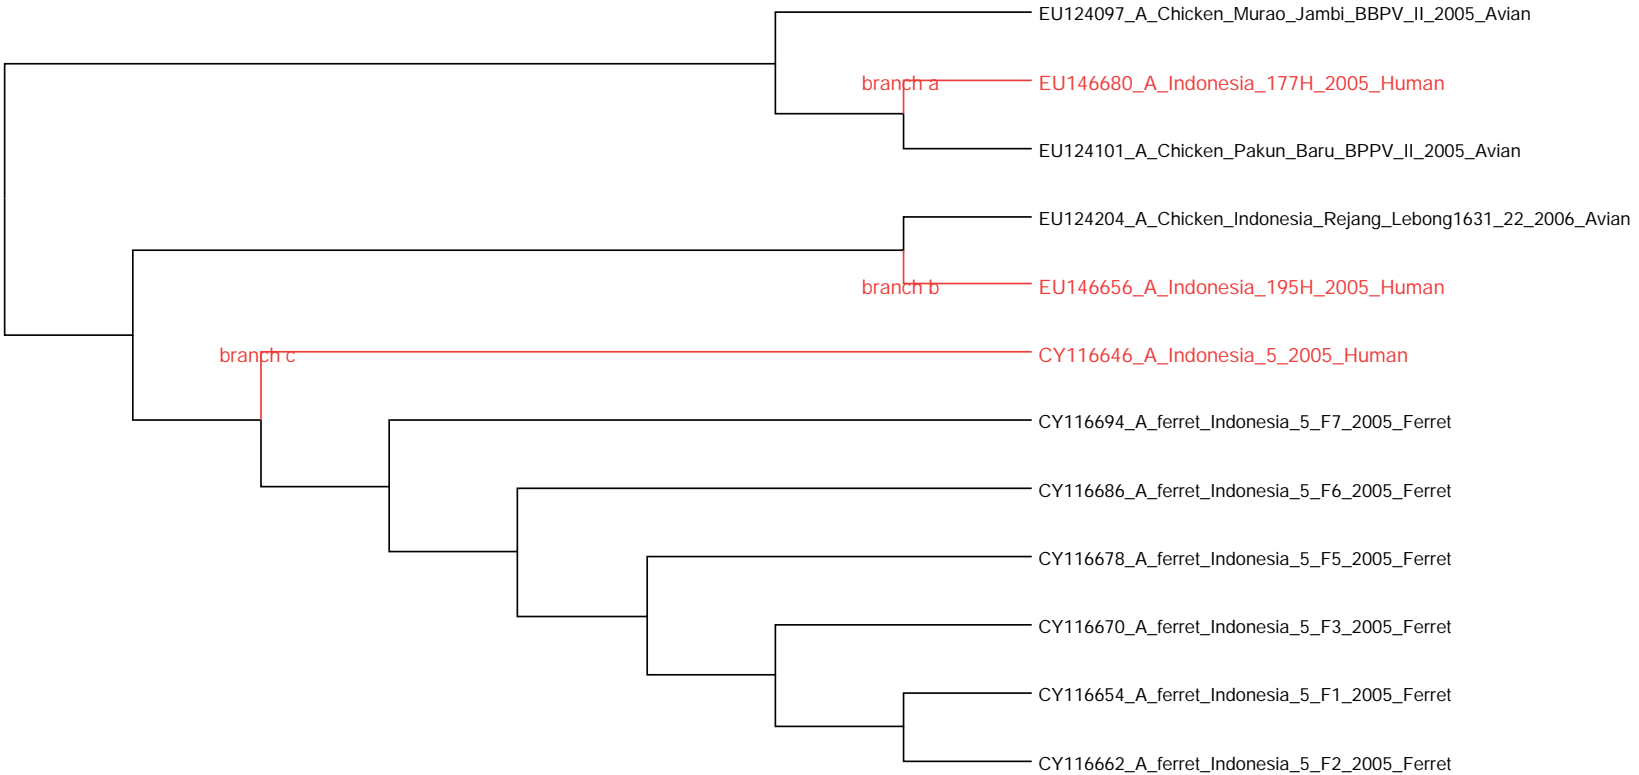



# HA-Group129

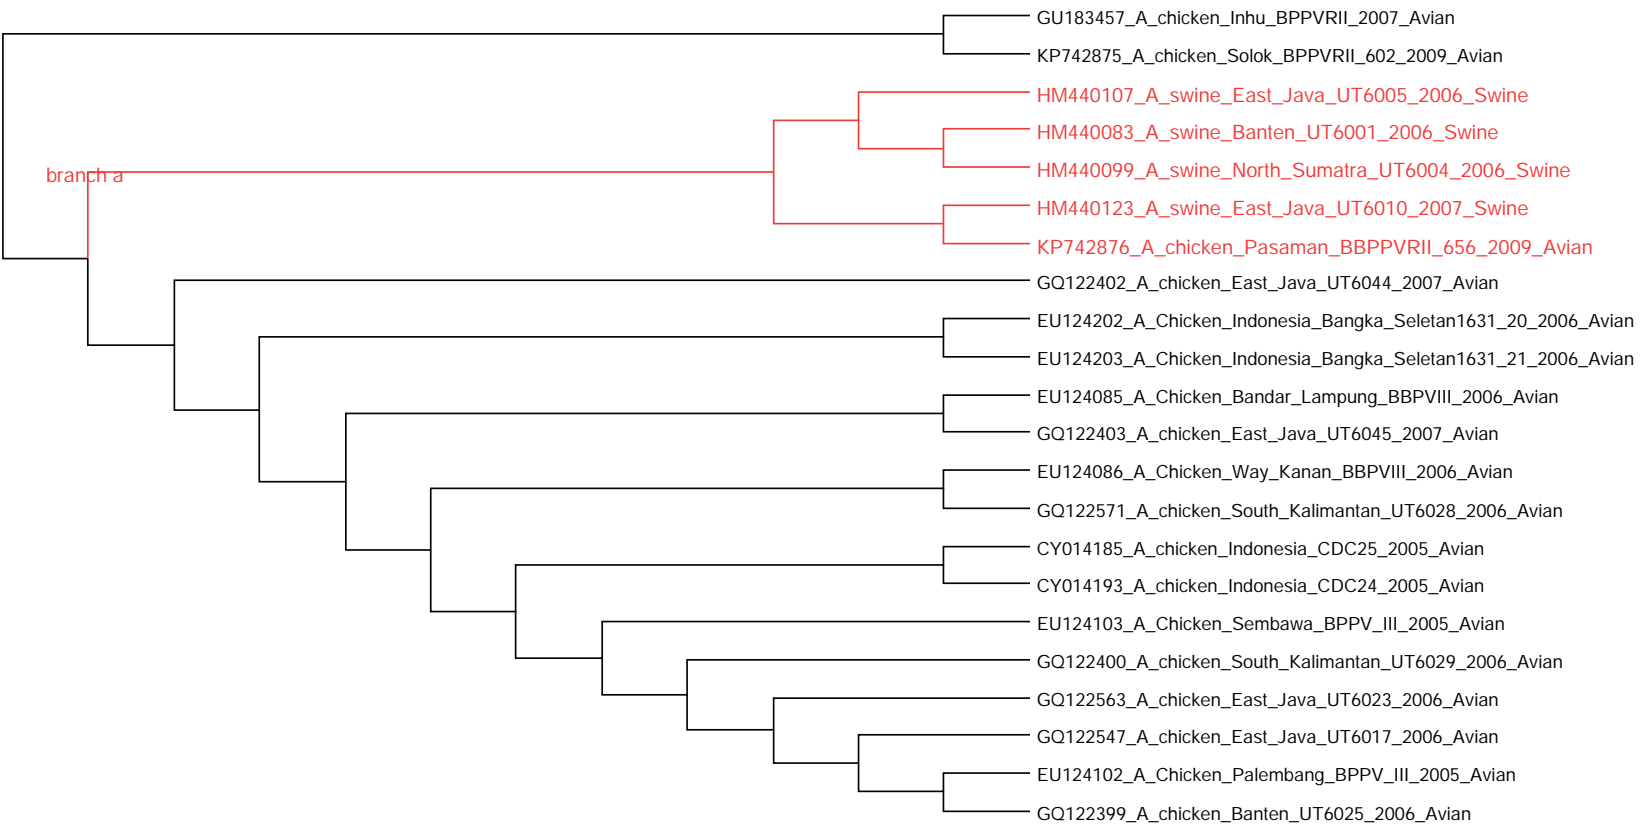

# HA-Group 130

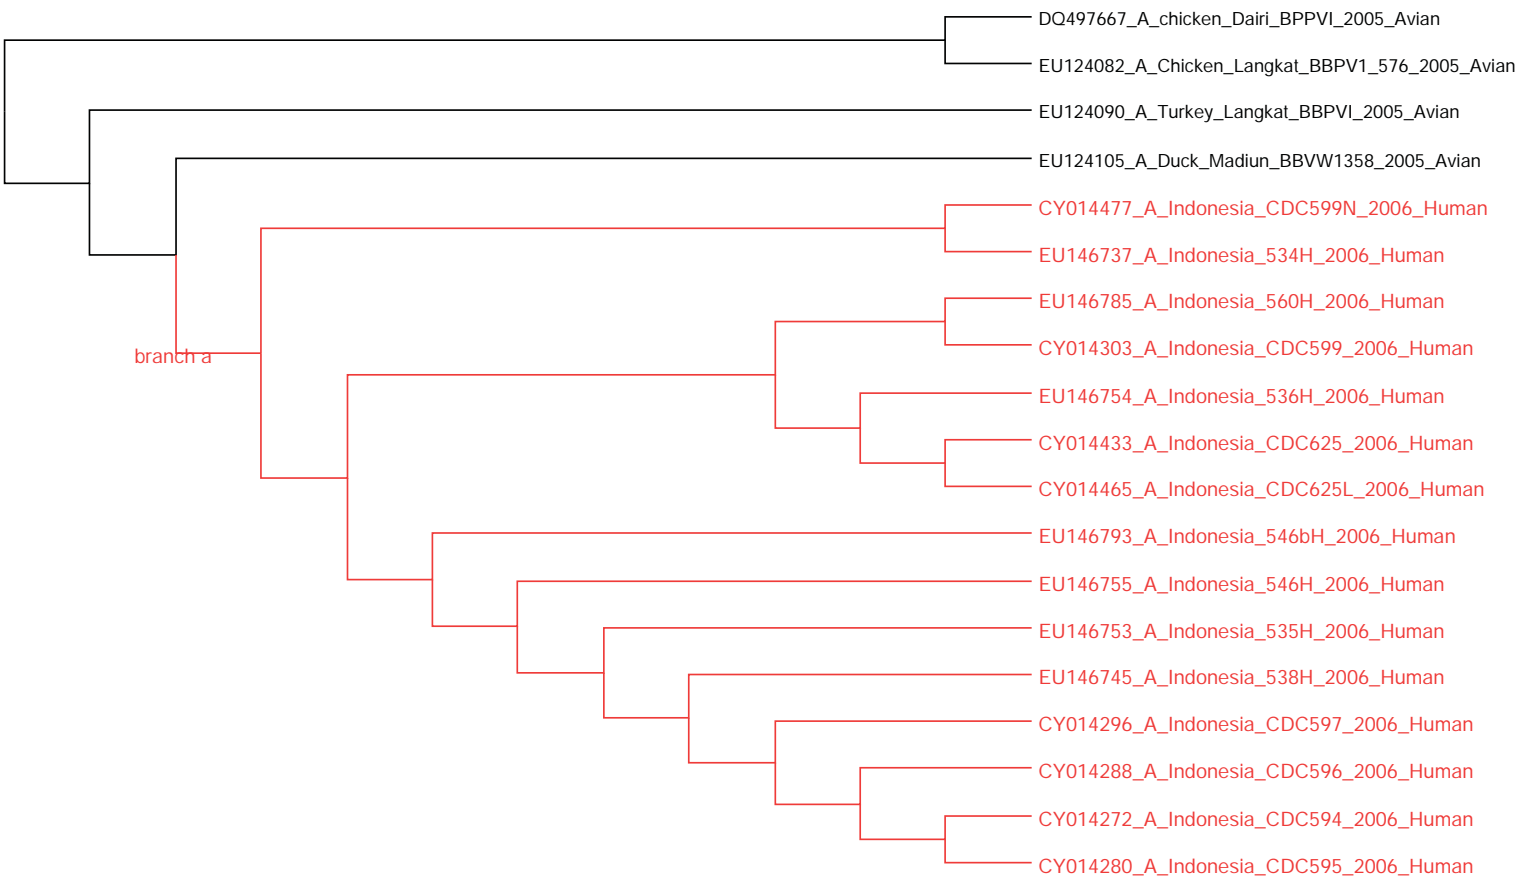

# HA-Group 131

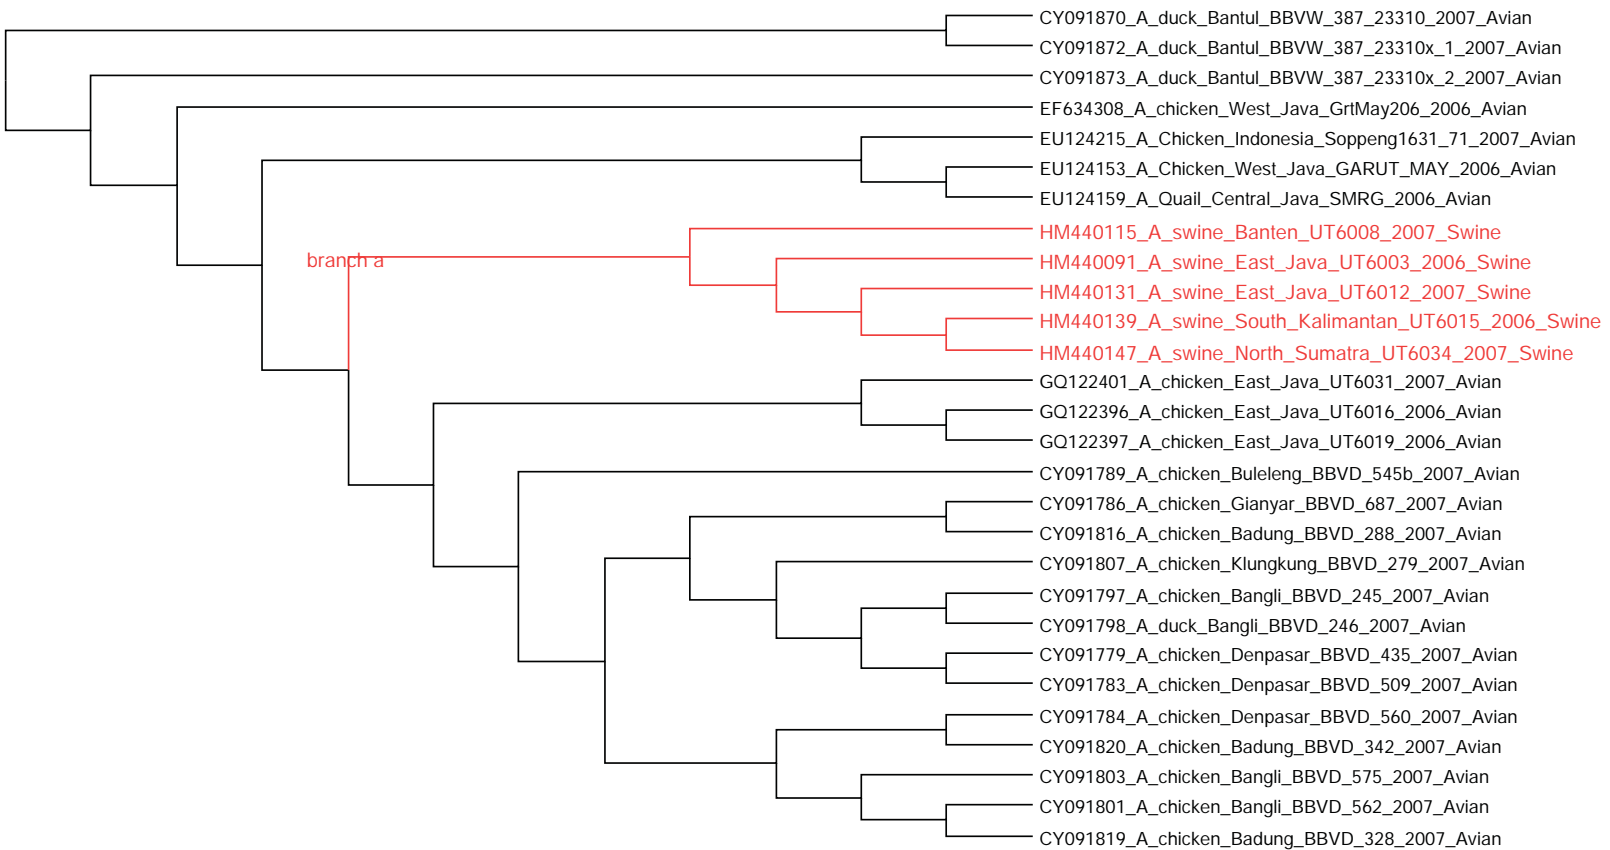

# HA-Group132

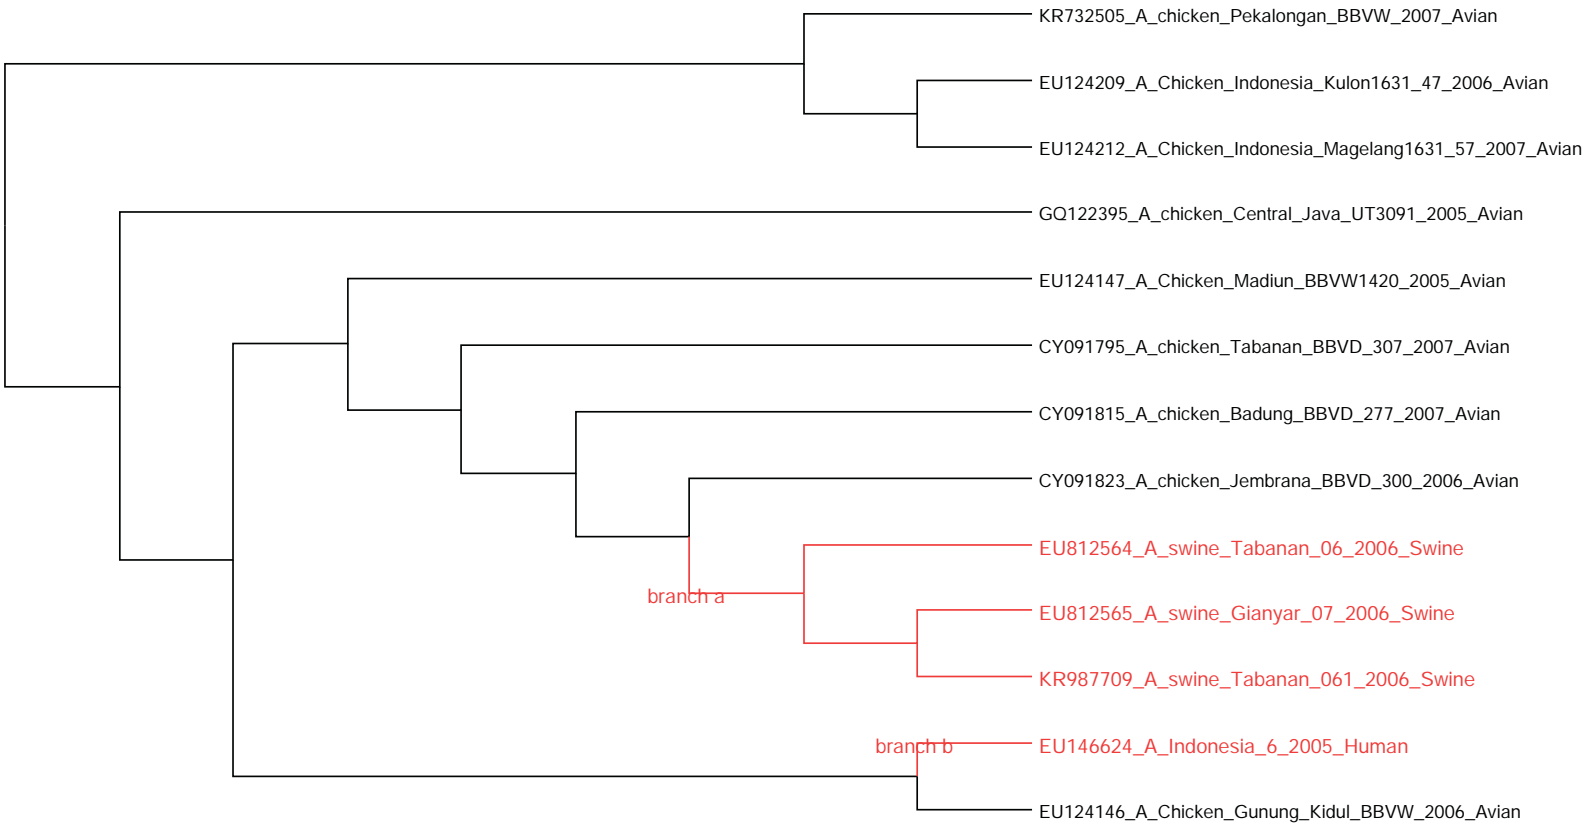

Supplement: Supplementary file [file 15450311]
